# Supplementary material
Source: HighWire-hosted journal article supplement (https://www.cmajopen.ca/highwire/filestream/80962/field_highwire_adjunct_files/4/2016-0084_original_submission.pdf)
Supplement: 2016-0084_original_submission.pdf [file 2016-0084_original_submission.pdf]

1  
2  
3  
4  
5  
6  
7  
8 **Systematic review of the accuracy of antibody tests used to screen asymptomatic adults for hepatitis C**  
9 **infection**

10  
11 | Geneviève Cadieux, PhD, MD, ~~CCFP~~<sup>1</sup>, Jennifer Campbell, MD, MPH<sup>1</sup>, Nandini Dendukuri, PhD<sup>2</sup>  
12

13  
14 <sup>1</sup> University of Toronto, Dalla Lana School of Public Health

15 <sup>2</sup> McGill University, Department of Epidemiology, Biostatistics, and Occupational Health  
16  
17

18 **Corresponding author:**

19 Dr Geneviève Cadieux  
20 c/o Public Health & Preventive Medicine Residency Program  
21 Dalla Lana School of Public Health  
22 University of Toronto  
23 155 College St, 5<sup>th</sup> floor  
24 Toronto, ON, M5T 3M7  
25 Cell phone: 416-258-9396  
26 Email: [genevieve.cadieux@mail.utoronto.ca](mailto:genevieve.cadieux@mail.utoronto.ca)  
27

28 **Funding statement:**

29 No funding was received for this research.  
30

31 **Competing interests:**

32 The authors have no competing interests.  
33  
34

35 **Word count (max 2,500):** 2,789  
36  
37  
38  
39  
40  
41  
42  
43  
44  
45  
46  
47  
48  
49  
50  
51  
52  
53  
54  
55  
56  
57  
58  
59  
60

1  
2  
3  
4  
5  
6  
7  
8  
9  
10  
11  
12  
13  
14  
15  
16  
17  
18  
19  
20  
21  
22  
23  
24  
25  
26  
27  
28  
29  
30  
31  
32  
33  
34  
35  
36  
37  
38  
39  
40  
41  
42  
43  
44  
45  
46  
47  
48  
49  
50  
51  
52  
53  
54  
55  
56  
57  
58  
59  
60

**ABSTRACT**

**Background:** ~~Several expert groups, including the United States Preventive Services Task Force and the Canadian Task Force on Preventive Health Care, have recently examined or are currently examining whether or not primary care physicians should screen asymptomatic adults for hepatitis C virus (HCV) infection.~~ ~~The Canadian Task Force on Preventive Health Care is examining whether or not Canadian primary care physicians should screen asymptomatic adults for hepatitis C virus (HCV) infection.~~ To inform decision-making on HCV screening, we performed a systematic review of the accuracy of antibody tests, as compared to other immunoassays and RNA detection, for screening asymptomatic adults for HCV infection.

**Methods:** MEDLINE and EMBASE databases were searched from 1990-2016; resulting citations were uploaded into DistillerSR and independently screened by 2 reviewers. Risk of bias was assessed using the QUADAS-2 tool; the quality of the 'body of evidence' was assessed using GRADE methodology.

**Results:** Of 1,537 articles identified, 81 underwent full-text review, and 9 studies met inclusion criteria. Compared to RNA detection, the sensitivity of ELISA v3.0 was variable (61.0%-81.8%) and the specificity was high (97.5%-99.7%). As expected, there were more false-positive results when comparing antibody tests to RNA detection than to other immunoassays; in fact, there were more false-positives than true-positives. Our GRADE assessment suggested that there was a high concern for risk of bias, particularly verification bias, and substantial inconsistency between studies in terms of their design.

**Interpretation:** More research is needed to better characterize the accuracy of antibody tests used to screen for HCV infection in the general population. Jurisdictions that recently adopted birth cohort screening for HCV infection are encouraged to evaluate and report on HCV screening test accuracy, and screening benefits and harms.

**PROSPERO registration:** #CRD42016039710

- Formatted: Not Highlight

## INTRODUCTION

The incidence of hepatitis C virus (HCV) infection in Canada has declined in recent years (1;2), and the population prevalence of chronic HCV infection is estimated at 0.64-0.71% (2), which is approximately half of that of the United States (3). An estimated 21-44% of those Canadians with chronic HCV infection are unaware of their infection (1;2). In low-prevalence countries like Canada and the United Kingdom, the approach to HCV prevention and control has focused on case-finding (4;5), i.e., testing persons with risk factors for HCV infection, such as intravenous drug users (~~HVDU~~) and refugees from endemic countries. The recent development of costly but effective treatment for chronic hepatitis C (6) has led some to re-evaluate the evidence for/against population screening for HCV infection (7). In 2013, the United States Preventive Services Task Force (~~USPSTF~~) revised their 2004 recommendation against screening asymptomatic adults for HCV infection (8); it now recommends one-time screening for all adults born between 1945 and 1965 (7). The Canadian Task Force on Preventive Health Care (~~CTFPHC~~) is currently examining whether or not primary care physicians should screen asymptomatic adults for HCV infection (9).

The World Health Organization (10;11) and the UK National Screening Committee's (12) guidance on when screening should be performed emphasizes the fundamental importance of having a 'safe, valid, and reliable' screening test. Screening for HCV infection typically relies on antibody testing. Because approximately 25% of HCV-infected persons spontaneously clear the infection (13) but antibodies may persist (14), antibody testing cannot discriminate current from resolved infections, leading to false-positive results (15). False-positive results can also occur from other antibodies interacting non-specifically with the test (16). False-positive results can cause harm (e.g., through labeling, anxiety). Therefore, individuals who screen positive typically undergo further testing, which has resource implications and may carry additional inherent risk. To inform decision-making on screening for chronic HCV infection, we performed a systematic review of the evidence on the accuracy of antibody tests used to screen asymptomatic adults for HCV infection.

## METHODS

### Laboratory tests for HCV

Laboratory tests for HCV can be divided into 3 categories based on what they detect: 1) antibodies to HCV, 2) antibodies to HCV and HCV core antigen (i.e., antigen-antibody tests), or 3) HCV RNA (16). Antibody tests include third-generation enzyme-linked immunosorbent assay (ELISA), chemiluminescent immunoassay (CLIA), electro chemiluminescent immunoassay (ECLIA), chemiluminescent microparticle immunoassay (CMIA), and

1  
2  
3  
4  
5  
6  
7  
8  
9  
10  
11  
12  
13  
14  
15  
16  
17  
18  
19  
20  
21  
22  
23  
24  
25  
26  
27  
28  
29  
30  
31  
32  
33  
34  
35  
36  
37  
38  
39  
40  
41  
42  
43  
44  
45  
46  
47  
48  
49  
50  
51  
52  
53  
54  
55  
56  
57  
58  
59  
60

microparticle enzyme immunoassay (MEIA). Each commercial antibody testing kit uses slightly different sets of HCV antigens to bind and detect host antibodies (Table 1). Antigen-antibody tests include fourth-generation ELISAs; because they detect antibodies to HCV, they would have the same issues with false-positives as 3<sup>rd</sup> generation ELISAs, but higher sensitivity because they also detect HCV antigen. Molecular techniques that detect HCV RNA, such as polymerase chain reaction (PCR) and nucleic acid testing (NAT), are recommended as confirmatory tests (17), even though immunocompromised and hemodialysis patients may have false-negative results (16). RNA-based testing can detect HCV before antibodies are produced (early infection) and can differentiate between current and resolved infection (i.e., fewer false-positives). It is important to note that there is no perfect reference standard for HCV infection, and the [United States Centers for Disease Control and Prevention](#) CDC has recommended a testing strategy where the initial test is an antibody test, and the confirmatory test may be either RNA detection or serological methods similar to the index test (17).

#### Environmental scan of laboratory testing for HCV in Canada

To scope our systematic review, we first performed an environmental scan of laboratory testing for HCV in Canada. Given that provincial/territorial (P/T) laboratories generally perform the majority of HCV testing (18), one author (GC) searched the grey literature on P/T laboratory and CATIE websites, and contacted P/T laboratories by email in February 2016, on behalf of the [Canadian Task Force for Preventive Health Care](#), to inquire about HCV testing (Appendix A). In a majority of P/T labs, the initial test used was an antibody test, such as CLIA (British Columbia, Northwest Territory, Saskatchewan), CMIA (Alberta, Manitoba, New Brunswick, Newfoundland & Labrador, Nova Scotia, Ontario), or MEIA (Quebec). Confirmatory testing was typically performed using another immunoassay, such as CMIA (British Columbia, Saskatchewan), CLIA (Ontario), fourth-generation ELISA (Alberta), or recombinant immunoblot assay (RIBA) (Manitoba, Quebec), rather than PCR (New Brunswick, Newfoundland & Labrador, Nova Scotia). Use of a different immunoassay to confirm HCV infection (19), rather than RNA detection, is also aligned with current US Centers for Disease Control and Prevention ~~(CDC)~~ recommendations (17).

#### Research question

Our objective was to carry out a systematic review to estimate the accuracy of antibody tests used in Canada (i.e., CMIA, CLIA, ECLIA, MEIA, and ELISA version 3.0) to screen for HCV infection among asymptomatic, non-pregnant, treatment-naïve adults with unknown liver enzyme values. In the absence of a perfect reference standard, we used two different sets of reference tests: 1) inferior serological reference tests (CMIA, CLIA, ECLIA, MEIA, ELISA version 3.0+, RIBA) commonly used as confirmatory tests in Canada, and 2) superior RNA-based reference tests (PCR, NAT), which are less commonly used. We also sought to assess the accuracy of the

1  
2  
3  
4  
5  
6  
7  
8 two-step HCV screening procedure (i.e., the combination of the initial and confirmatory tests) currently used in  
9 Canada. The research protocol to answer this question was registered with PROSPERO (#CRD42016039710).  
10

#### 11 12 13 14 **Literature search strategy**

15 The literature search strategy was developed with the help of a librarian at the University of Toronto Gerstein  
16 Science Information Centre (Appendix B). Ovid MEDLINE® 1946 to present, Ovid MEDLINE® In-Process & Other  
17 Non-Indexed Citations, and Ovid EMBASE® were systematically searched using both controlled vocabulary and  
18 keywords. Because the oldest immunoassay of interest (ELISA v3.0) was first marketed in 1993 (20), retrieval  
19 was limited to articles published between January 1, 1990 and May 6, 2016. Language was restricted to English  
20 or French. Conference abstracts were excluded from the search results.  
21  
22

#### 23 24 25 **Selection criteria**

26 Original research studies, systematic reviews and meta-analyses were eligible for inclusion. At least 80% of the  
27 study population had to be asymptomatic, non-pregnant, treatment-naïve adults with unknown liver enzyme  
28 values and unknown HCV status (e.g., general population, blood donors); high-risk groups such as hemodialysis  
29 patients, transplant/transfusion recipients, ~~IVDU~~ intravenous drug users, patients co-infected with other  
30 blood-borne infections were excluded, as well as blood bank specimens that previously tested negative for HCV  
31 and specimen panels. The index test had to be one of CLIA, ECLIA, CMIA, MEIA, or ELISA v3.0; rapid tests, tests  
32 performed on specimens other than blood (e.g., saliva), and sero/genotyping tests were excluded. Within a  
33 given study, the reference test had to be different from the index test. In the absence of a perfect reference  
34 standard, two different sets of reference tests were eligible for inclusion: inferior serological reference tests  
35 (CMIA, CLIA, ECLIA, MEIA, ELISA version 3.0+, RIBA) and superior RNA-based reference tests (PCR, NAT). The  
36 reference test had to be applied to some subjects who tested positive on the index test as well as some of  
37 those who tested negative on the index test, so that a 2x2 table could be filled and sensitivity and/or specificity  
38 estimated. The setting had to resemble primary care (e.g., blood donation centre, population-based screening);  
39 hospital-based specialty clinics and inpatient hospital settings were excluded.  
40  
41  
42  
43  
44  
45

#### 46 47 **Selection method**

48 Using DistillerSR software, both reviewers (GC, JC) independently screened all titles and abstracts using the  
49 pre-determined selection criteria above. Potentially relevant articles were retrieved, and both reviewers (GC,  
50 JC) screened all full-text articles using the same selection criteria as above. Disagreements were resolved  
51 through discussion.  
52  
53  
54  
55  
56  
57  
58  
59  
60

### Data extraction

One reviewer (GC) extracted data on study characteristics and findings from each included study into Tables 2-4, as appropriate. Raw data was abstracted to create 2x2 tables of index test(s) compared to reference test(s) for each study. The second reviewer (JC) verified the accuracy and completeness of the other's data extraction. Disagreements were resolved through discussion. Authors of one included study were contacted (21) to obtain additional data not reported in the published article (22).

### Risk of bias assessment

One reviewer (GC), with previous experience conducting validation studies (23;24) and performing statistical adjustment for verification bias (25), assessed the risk of bias and applicability of each included study using the Quality Assessment of Diagnostic Accuracy Studies (QUADAS-2) tool. QUADAS-2 focuses on four domains: patient selection, index test, reference test, as well as patient flow and timing of testing (26). The second reviewer (JC) verified the accuracy and completeness of the other's assessment. Disagreements were resolved through discussion.

### Statistical analyses

Sensitivity, specificity, positive predictive value (PPV), negative predictive value (NPV), false-positive (FP) rate, false-negative (FN) rate, and 95% confidence intervals (CI) were estimated using the raw data (2x2 tables) extracted from the included studies. For studies that suffered from verification bias as a result of the sampling strategy used, statistical adjustment of sensitivity and specificity estimates (and therefore false-positive FP and false-negative FN rate) was performed (27). Given the small number of included studies and the heterogeneity of index-reference test pairings between studies, quantitative synthesis was not considered appropriate.

### Assessment of the quality of the 'body of evidence' using GRADE

Whereas studies using inferior serological reference tests reflect current laboratory practice in several P/T, they likely underestimate the true number of false-positives. For this reason, we further restricted the 'body of evidence' to studies where the index test was an antibody test (reflecting current laboratory practice) and the reference test detected RNA. Two reviewers (GC, JC) independently used GRADE methodology for diagnostic testing accuracy (DTA) studies (28-31) to assess the body of evidence; disagreements between reviewers were resolved through discussion. The GRADE criteria evaluate the evidence in terms of study design, risk of bias, indirectness, imprecision, and publication bias (31).

## RESULTS

### Literature search results and characteristics of included studies

1,537 articles were identified, of which 81 underwent full-text review, and 9 were included (Figure 1). A list of all excluded studies and each study's reason for exclusion is available in Appendix C. We did not identify any eligible studies that evaluated the two-step HCV screening procedure. Included studies (Table 2) were conducted in countries with low (15;32;33), moderate (34;35), and high (22;36-38) HCV prevalence (39). ~~Only 2 studies involved routine HCV screening of the general population (21;31); the other 7 studies involved blood donor screening (14;32-37). The 9 included studies reported on 11 different index-reference test pairings: 5 studies compared antibody tests to other antibody tests (14;21;31;32;35), 2 studies compared antigen-antibody tests to antibody tests (33;36), 3 studies compared antibody tests to RNA detection (20;21;35;37), and 1 study compared an antigen-antibody test to RNA detection (34).~~

~~Seven studies applied the index and reference tests to all samples in parallel (14;31;32;34-37); 2 studies (21;33) suffered from verification bias as a result of applying the reference test to a larger proportion of samples that had tested positive on the index test relative to those that had tested negative on the index test (Appendix D—QUADAS-2 assessment).~~

### Accuracy of immunoassays as compared to other immunoassays

The sample size of studies comparing two immunoassays ranged from 106 to 5,208 (Table 3). For antibody tests compared to other antibody tests, sensitivity ranged from 70.4% to 99.5% and specificity ranged from 98.7% to 99.8%. For an antigen-antibody test compared to an antibody test, sensitivity ranged from 52.4% to 95.6% and specificity was over 99%.

### Accuracy of immunoassays as compared to RNA detection

The sample size of studies comparing an antibody test to RNA detection ranged from 106 to 21,115 (Table 4). For antibody tests compared to RNA detection, sensitivity ranged from 61.0% to 81.8% and specificity ranged from 97.5% to 99.7%. As expected, the antigen-antibody test performed better against RNA detection than the antibody tests did; its sensitivity was 90.2% and its specificity was 99.8%. Also as expected, the number of false-positive results was higher when comparing antibody tests to RNA detection than to other antibody tests; in fact, there were more false-positives than true-positives.

### Assessment of included studies' risk of bias using QUADAS-2

Field Code Changed

1  
2  
3  
4  
5  
6  
7  
8 With respect to patient selection, only 2 studies involved routine HCV screening of the general population  
9 (22;32); the other 7 studies involved blood donor screening (15;33-38) (Appendix D – QUADAS-2 assessment).  
10 The 9 included studies reported on 11 different index—reference test pairings: 5 studies compared antibody  
11 tests to other antibody tests (15;22;32;33;36), 2 studies compared antigen-antibody tests to antibody tests  
12 (34;37), 3 studies compared antibody tests to RNA detection (21;22;36;38), and 1 study compared an antigen-  
13 antibody test to RNA detection (35). With respect to study flow and timing, 7 studies applied the index and  
14 reference tests to all samples in parallel (15;32;33;35-38); 2 studies (22;34) suffered from verification bias as a  
15 result of applying the reference test to a larger proportion of samples that had tested positive on the index test  
16 relative to those that had tested negative on the index test.  
17  
18  
19  
20

#### 21 **Assessment of the quality of the 'body of evidence' using GRADE**

22  
23 Three studies comparing antibody tests to RNA detection were considered for inclusion in the 'body of  
24 evidence'. One study (22) was excluded because, as a result of there being zero false-negatives, the correction  
25 of the sensitivity estimate for verification bias was overly conservative (40) and the uncorrected sensitivity was  
26 too biased to be meaningful. Another study (36) was excluded because, based on its results, the study  
27 prevalence of HCV was 23.6%; this very high prevalence suggests that either the study population was not  
28 reflective of the general population or a case-control design was used (in either case, it did not meet our  
29 inclusion criteria). Findings from the remaining study (38) were assessed as 'very low' quality of evidence using  
30 GRADE (Table 5); this study reported a sensitivity of 81.8%, 95% CI (59.0-100%) and a specificity of 99.7%, 95% CI  
31 (99.6-99.8%). Assuming an HCV seroprevalence of 0.96% as in the general Canadian population (2), instead  
32 of the 0.1% prevalence among the 17,840 blood donors in the study (38), the PPV would be 72.7%, 95% CI  
33 (66.2-78.8%), and the NPV would be 99.8%, 95% CI (99.8-99.9%).—Applying this study's findings to 1,000  
34 individuals drawn from the general Canadian population (Table 5), assuming a population HCV seroprevalence  
35 of 0.96% (0.61%–1.34%) (2), we would expect 8, 95% CI (6-10) true-positives, 987, 95% CI (986-988) true-  
36 negatives, 3, 95% CI (2-4) false-positives, and 2, 95% CI (0-4) false-negatives.  
37  
38  
39  
40  
41  
42

#### 43 **INTERPRETATION**

44  
45  
46 We performed a systematic review of the evidence on the accuracy of antibody tests, as compared to other  
47 immunoassays and RNA detection, for screening asymptomatic adults for HCV infection. We found that the  
48 sensitivity of antibody tests was highly variable (52.4%-99.5%) and the specificity was high (97.5%-99.8%). The  
49 lack of a perfect reference test for HCV raises concerns that these estimates are biased. In particular, when an  
50 inferior serological reference test that shares the same risk of false-positives as the index test is used, the  
51  
52  
53  
54  
55  
56  
57  
58  
59  
60

Field Code Changed



1  
2  
3  
4  
5  
6  
7  
8 specificity could be overestimated. As expected, we found that there were more false-positive results when  
9 comparing antibody tests to superior RNA-based reference tests, than to inferior serological reference tests; in  
10 fact, there were more false-positives than true-positives owing to the very low prevalence of HCV. Bias  
11 correction of the specificity estimate could make the difference even greater. This finding highlights a potential  
12 problem with using an inferior serological reference test as a confirmatory test (17;19) when screening the  
13 general population for HCV infection. Our assessment of the 'body of evidence' using GRADE methodology led  
14 us to focus on a single 'least biased' study (38), which reported the sensitivity of ELISA v3.0 compared to NAT as  
15 81.8%, 95% CI (59.0%-100%), its specificity as 99.8%, 95% CI (99.7%-99.8%), and its PPV as 13.8%, 95% CI (5.4-  
16 22.2).  
17  
18  
19  
20

21 The only other systematic review of HCV antibody test accuracy was performed in the context of the [United](#)  
22 [States Preventive Services Task Force's](#) 2004 recommendation on HCV screening. However, the populations of  
23 the studies included in that review (i.e., hemodialysis patients, patients with histologically-verified hepatitis,  
24 patients hospitalized with suspected acute/chronic hepatitis, blood donors with persistently elevated liver  
25 enzymes, and blood donors who previously screened positive for HCV) did not reflect the general population,  
26 therefore those findings are not directly comparable to ours (8;20). When the [United States Preventive](#)  
27 [Services Task Force](#) revised its recommendation on HCV screening in 2013, it did not re-assess HCV screening  
28 test accuracy, despite the introduction of new immunoassays (i.e., CLIA, ECLIA, CMIA, MEIA) since its 2004  
29 systematic review (3). Similarly, when the WHO published its HCV screening guideline in 2014 (41), it did not  
30 re-assess screening test accuracy, instead citing a 2001 report (42) on simple/rapid test accuracy and a 2002  
31 report (43) on ELISA v3.0+ immunoassay accuracy, both involving blood panels not reflective of the general  
32 population. Because antibody tests have not been adequately evaluated for population-based HCV screening,  
33 and because the availability of a 'safe, valid, and reliable' screening test is a fundamental consideration of any  
34 screening recommendation or program (10-12), this highlights a knowledge gap and brings into question the  
35 evidence basis for these recommendations.  
36  
37  
38  
39  
40  
41  
42

43 Our findings are limited by the paucity and the low quality of the available evidence [published in English or](#)  
44 [French](#). In particular, we were unable to locate any studies of the accuracy of CLIA, CMIA, or MEIA (the HCV  
45 screening tests most commonly used in Canada) as compared to RNA detection for HCV screening in the  
46 general population. The applicability of our findings to the general Canadian population is limited because a  
47 majority of included studies were conducted among blood donors, and persons eligible to donate blood are at  
48 lower risk of blood-borne infections like HCV than the general population. Rapid and point-of-care tests were  
49 beyond the scope of our review; whereas those tests are important for reaching some vulnerable populations,  
50  
51  
52  
53  
54  
55  
56  
57  
58  
59  
60

1  
2  
3  
4  
5  
6  
7  
8  
9  
10  
11  
12  
13  
14  
15  
16  
17  
18  
19  
20  
21  
22  
23  
24  
25  
26  
27  
28  
29  
30  
31  
32  
33  
34  
35  
36  
37  
38  
39  
40  
41  
42  
43  
44  
45  
46  
47  
48  
49  
50  
51  
52  
53  
54  
55  
56  
57  
58  
59  
60

a majority of HCV testing in Canada is laboratory-based (18); also, a systematic review of the accuracy of rapid tests was recently published (44).

In conclusion, the availability of a 'safe, valid, and reliable' screening test is a primordial consideration for decision-making about screening (10-12), but our study has shown that more-further research is needed to adequately characterize the accuracy of antibody tests used to screen the general population for HCV infection. ~~Whereas decision-making about screening involves multiple considerations, such as the availability of safe and effective treatment, having a 'safe, valid, and reliable' screening test is a primordial consideration (10-12). Our study focused on the accuracy of HCV screening tests; however, several other important factors must be considered when making decisions about HCV screening, including: the benefits and harms of screening, the benefits and harms of treatment for screen-detected cases, the cost-effectiveness of screening, as well as patient preferences related to screening. A review of the evidence related to these considerations is beyond the scope of the present study, but such a review is being performed by others in the context of the Canadian Task Force on Preventive Health Care's upcoming guidelines on HCV screening. To help inform decision-making about HCV screening, we encourage jurisdictions that have already adopted population-based (birth cohort) HCV-screening for HCV to carefully evaluate and report on the accuracy of antibody tests, as well as screening benefits and harms; these findings will help inform future HCV screening policies.~~

**ACKNOWLEDGEMENTS**

~~We are grateful to Dr Roland Grad and Alejandra Jaramillo, members of the working group on HCV screening of the Canadian Task Force for Preventive Health Care, for their helpful comments on our study design, findings, and manuscript. We are grateful to the members of the Canadian Task Force for Preventive Health Care and the Public Health Agency of Canada's Preventive Guidelines Division for enabling us to undertake this work and for their helpful comments on our manuscript. We would also like to thank Dr Barry Pakes, our Public Health & Preventive Medicine residency program director at the University of Toronto, Dr Barry Pakes, for his support and editorial suggestions.~~

Formatted: Not Highlight  
Formatted: Not Highlight  
Formatted: Not Highlight

## REFERENCES

- (1) Public Health Agency of Canada (PHAC). Hepatitis C in Canada: 2005-2010 Surveillance Report. 2012. Available from: [http://publications.gc.ca/collections/collection\\_2012/aspc-phac/HP40-70-2012-eng.pdf](http://publications.gc.ca/collections/collection_2012/aspc-phac/HP40-70-2012-eng.pdf)
- (2) Trubnikov M, Yan P, Archibald C. Estimated prevalence of hepatitis C virus infection in Canada, 2011. *CCDR* 2014;40(19):429-36.
- (3) Chou R, Cottrell EB, Wasson N, Rahman B, Guise JM. Screening for hepatitis C virus infection in adults: a systematic review for the U.S. Preventive Services Task Force. *Ann Intern Med* 2013 Jan 15;158(2):101-8.
- (4) Provincial Infectious Disease Advisory Committee (PIDAC). Recommendations for the Public Health Response to Hepatitis C in Ontario. 2014. Available from: [https://www.publichealthontario.ca/en/BrowseByTopic/InfectiousDiseases/PIDAC/Pages/PIDAC\\_Documents.aspx#.V1TB0pOzI\\_k](https://www.publichealthontario.ca/en/BrowseByTopic/InfectiousDiseases/PIDAC/Pages/PIDAC_Documents.aspx#.V1TB0pOzI_k)
- (5) National Health Service (NHS). Hepatitis C: Essential information for professionals and guidance on testing. 2004. Available from: <http://www.nhs.uk/hepatitisc/SiteCollectionDocuments/pdf/essential-information-for-professionals-and-guidance-on-testing.pdf>
- (6) Kohli A, Shaffer A, Sherman A, Kottlil S. Treatment of hepatitis C: a systematic review. *JAMA* 2014 Aug 13;312(6):631-40.
- (7) Moyer VA. Screening for hepatitis C virus infection in adults: U.S. Preventive Services Task Force recommendation statement. *Ann Intern Med* 2013 Sep 3;159(5):349-57.
- (8) Chou R, Clark EC, Helfand M. Screening for hepatitis C virus infection: a review of the evidence for the U.S. Preventive Services Task Force. *Ann Intern Med* 2004 Mar 16;140(6):465-79.
- (9) Canadian Task Force on Preventive Health Care (CTFPHC). Recommendations on Screening for Hepatitis C. Last updated: 11-19-2015. Accessed: 6-12-2016. <http://canadiantaskforce.ca/ctfphc-guidelines/2015-hepatitis-c/guidelines-on-screening-for-hepatitis-c/>
- (10) Wilson JM, Jungner YG. [Principles and practice of mass screening for disease]. *Bol Oficina Sanit Panam* 1968 Oct;65(4):281-393.
- (11) Andermann A, Blancquaert I, Beauchamp S, Dery V. Revisiting Wilson and Jungner in the genomic age: a review of screening criteria over the past 40 years. *Bulletin of the World Health Organization* 2008;86(4):317-9.
- (12) Public Health England (PHE). Criteria for appraising the viability, effectiveness and appropriateness of a screening programme. Last updated: 10-23-2015. Accessed: 4-27-2016. <https://www.gov.uk/government/publications/evidence-review-criteria-national-screening-programmes/criteria-for-appraising-the-viability-effectiveness-and-appropriateness-of-a-screening-programme>
- (13) Hajarizadeh B, Grebely J, Dore GJ. Epidemiology and natural history of HCV infection. *Nat Rev Gastroenterol Hepatol* 2013 Sep;10(9):553-62.

- 1  
2  
3  
4  
5  
6  
7  
8  
9  
10  
11  
12  
13  
14  
15  
16  
17  
18  
19  
20  
21  
22  
23  
24  
25  
26  
27  
28  
29  
30  
31  
32  
33  
34  
35  
36  
37  
38  
39  
40  
41  
42  
43  
44  
45  
46  
47  
48  
49  
50  
51  
52  
53  
54  
55  
56  
57  
58  
59  
60
- (14) Giuberti T, Ferrari C, Marchelli S, Degli Antoni AM, Schianchi C, Pizzaferrri P, et al. Long-term follow-up of anti-hepatitis C virus antibodies in patients with acute nonA nonB hepatitis and different outcome of liver disease. *Liver* 1992 Apr;12(2):94-9.
- (15) Denoyel G, van HJ, Bauer R, Preisel-Simmons B. Performance of a new hepatitis C assay on the Bayer ADVIA Centaur Immunoassay System. *Clin Lab* 2004;50(1-2):75-82.
- (16) Saludes V, Gonzalez V, Planas R, Matas L, Ausina V, Martro E. Tools for the diagnosis of hepatitis C virus infection and hepatic fibrosis staging. *World J Gastroenterol* 2014 Apr 7;20(13):3431-42.
- (17) Testing for HCV infection: an update of guidance for clinicians and laboratorians. *MMWR Morb Mortal Wkly Rep* 2013 May 10;62(18):362-5.
- (18) CATIE. Hepatitis C: Testing in your region. Last updated: 2010. Accessed: 2-22-2016. <http://www.catie.ca/en/practical-guides/hepc-in-depth/testing/testing-your-region>
- (19) Vermeersch P, Van RM, Lagrou K. Validation of a strategy for HCV antibody testing with two enzyme immunoassays in a routine clinical laboratory. *J Clin Virol* 2008 Aug;42(4):394-8.
- (20) Colin C, Lanoir D, Touzet S, Meyaud-Kraemer L, Bailly F, Trepo C. Sensitivity and specificity of third-generation hepatitis C virus antibody detection assays: an analysis of the literature. *J Viral Hepat* 2001 Mar;8(2):87-95.
- (21) Benouda A. Email communication regarding results for the 2x2 table of ELISA v3.0 compared to PCR. 2-22-2016.
- (22) Benouda A, Boujdiya Z, Ahid S, Abouqal R, Adnaoui M. [Prevalence of hepatitis C virus infection in Morocco and serological tests assessment of detection for the viremia prediction]. *Pathol Biol (Paris)* 2009 Jul;57(5):368-72.
- (23) Cadieux G, Tamblyn R. Accuracy of Physician Billing Claims for Identifying Acute Respiratory Infections in Primary Care. *Health Services Research* 2008 Dec;43(6):2223-38.
- (24) Cadieux G, Buckeridge DL, Jacques A, Libman M, Dendukuri N. Accuracy of Syndrome Definitions Based on Diagnoses in Physician Claims. *BMC Public Health* 2011 Jan 7;11:17-26.
- (25) Cadieux G, Tamblyn R, Buckeridge DL, Dendukuri N. Validation of Diagnostic Groups Based on Health Care Utilization Data Should Adjust for Sampling Strategy. *Med Care* 2015 Mar 27.
- (26) Whiting PF, Rutjes AW, Westwood ME, Mallett S, Deeks JJ, Reitsma JB, et al. QUADAS-2: a revised tool for the quality assessment of diagnostic accuracy studies. *Ann Intern Med* 2011 Oct 18;155(8):529-36.
- (27) Irwig L, Glasziou PP, Berry G, Chock C, Mock P, Simpson JM. Efficient Study Designs to Assess the Accuracy of Screening-Tests. *Am J Epidemiol* 1994 Oct 15;140(8):759-69.
- (28) Schunemann HJ, Oxman AD, Brozek J, Glasziou P, Jaeschke R, Vist GE, et al. Grading quality of evidence and strength of recommendations for diagnostic tests and strategies. *BMJ* 2008 May 17;336:1106-10.

- 1  
2  
3  
4  
5  
6  
7  
8 (29) Brozek JL, Akl EA, Jaeschke R, Lang DM, Bossuyt P, Glasziou P, et al. Grading quality of evidence and  
9 strength of recommendations in clinical practice guidelines: Part 2 of 3. The GRADE approach to  
10 grading quality of evidence about diagnostic tests and strategies. *Allergy* 2009 Aug;64(8):1109-16.  
11  
12 (30) Hsu J, Brozek JL, Terracciano L, Kreis J, Compalati E, Stein AT, et al. Application of GRADE: making  
13 evidence-based recommendations about diagnostic tests in clinical practice guidelines. *Implement  
14 Sci* 2011;6:62.  
15  
16 (31) Gopalakrishna G, Mustafa RA, Davenport C, Scholten RJ, Hyde C, Brozek J, et al. Applying Grading of  
17 Recommendations Assessment, Development and Evaluation (GRADE) to diagnostic tests was  
18 challenging but doable. *J Clin Epidemiol* 2014 Jul;67(7):760-8.  
19  
20 (32) Park Y, Seok Y, Choi J, Kim HS. Performance evaluation of the Vitros anti-hepatitis C virus antibody  
21 assay for use in clinical laboratories. *Clin Biochem* 2012 Jan;45(1-2):175-7.  
22  
23 (33) Sommesse L, Sabia C, Paolillo R, Parente D, Capuano M, Iannone C, et al. Screening tests for hepatitis  
24 B virus, hepatitis C virus, and human immunodeficiency virus in blood donors: evaluation of two  
25 chemiluminescent immunoassay systems. *Scand J Infect Dis* 2014 Sep;46(9):660-4.  
26  
27 (34) Ol HS, Bjoerkvoll B, Sothy S, Van HY, Hoel H, Husebekk A, et al. Prevalence of hepatitis B and hepatitis  
28 C virus infections in potential blood donors in rural Cambodia. *Southeast Asian J Trop Med Public  
29 Health* 2009 Sep;40(5):963-71.  
30  
31 (35) Arora S, Doda V. Role of signal-to-cut-off ratios of anti-hepatitis C virus antibody by enzyme  
32 immunoassays along with ID-NAT for screening of whole blood donors in India. *Asian J Transfus Sci*  
33 2016 Jan;10(1):75-8.  
34  
35 (36) Tashkandy MA, Khodari YA, Ibrahim AM, Dhafar KO, Gazzaz ZJ, Azab BA. Evaluation of the available  
36 anti-HCV antibody detection tests and RT-PCR assay in the diagnosis of hepatitis C virus infection.  
37 *Saudi J Kidney Dis Transpl* 2007 Nov;18(4):523-31.  
38  
39 (37) Rao HY, Ren FR, Guan WL, Houde M, Du SC, Liu CL, et al. Evaluation of the performance of the EIAGEN  
40 HCV test for detection of hepatitis C virus infection. *J Virol Methods* 2009 Dec;162(1-2):203-7.  
41  
42 (38) Kosan E, Kocazeybek B, Altunay H, Aymelek M, Alan E, Saribas S, et al. Can the nucleic acid  
43 amplification test (NAT) be an alternative to the serologic tests? A prospective study, the results of  
44 18,200 blood donors from the Turkish Red Crescent. *Transfus Apher Sci* 2010 Dec;43(3):269-72.  
45  
46 (39) Mohd HK, Groeger J, Flaxman AD, Wiersma ST. Global epidemiology of hepatitis C virus infection:  
47 new estimates of age-specific antibody to HCV seroprevalence. *Hepatology* 2013 Apr;57(4):1333-42.  
48  
49 (40) Cronin AM, Vickers AJ. Statistical methods to correct for verification bias in diagnostic studies are  
50 inadequate when there are few false negatives: a simulation study. *BMC Med Res Methodol*  
51 2008;8:75.  
52  
53 (41) World Health Organization (WHO). Guidelines for the screening, care and treatment of persons with  
54 hepatitis C infection. 2014 Apr. Available from: <http://www.who.int/hiv/pub/hepatitis/hepatitis-c-guidelines/en/>  
55  
56 (42) World Health Organization (WHO). Hepatitis C Assays: Operational Characteristics (Phase I) Report 1.  
57 2001 Jan. Available from: <http://apps.who.int/medicinedocs/en/d/Js15208e/>  
58  
59  
60

1  
2  
3  
4  
5  
6  
7  
8  
9  
10  
11  
12  
13  
14  
15  
16  
17  
18  
19  
20  
21  
22  
23  
24  
25  
26  
27  
28  
29  
30  
31  
32  
33  
34  
35  
36  
37  
38  
39  
40  
41  
42  
43  
44  
45  
46  
47  
48  
49  
50  
51  
52  
53  
54  
55  
56  
57  
58  
59  
60

(43) World Health Organization (WHO). Hepatitis C Assays: Operational Characteristics (Phase I) Report 2. 2001 Jul. Available from: <http://apps.who.int/iris/handle/10665/67061>

(44) Shivkumar S, Peeling R, Jafari Y, Joseph L, Pant PN. Accuracy of rapid and point-of-care screening tests for hepatitis C: a systematic review and meta-analysis. *Ann Intern Med* 2012 Oct 16;157(8):558-66.

Confidential

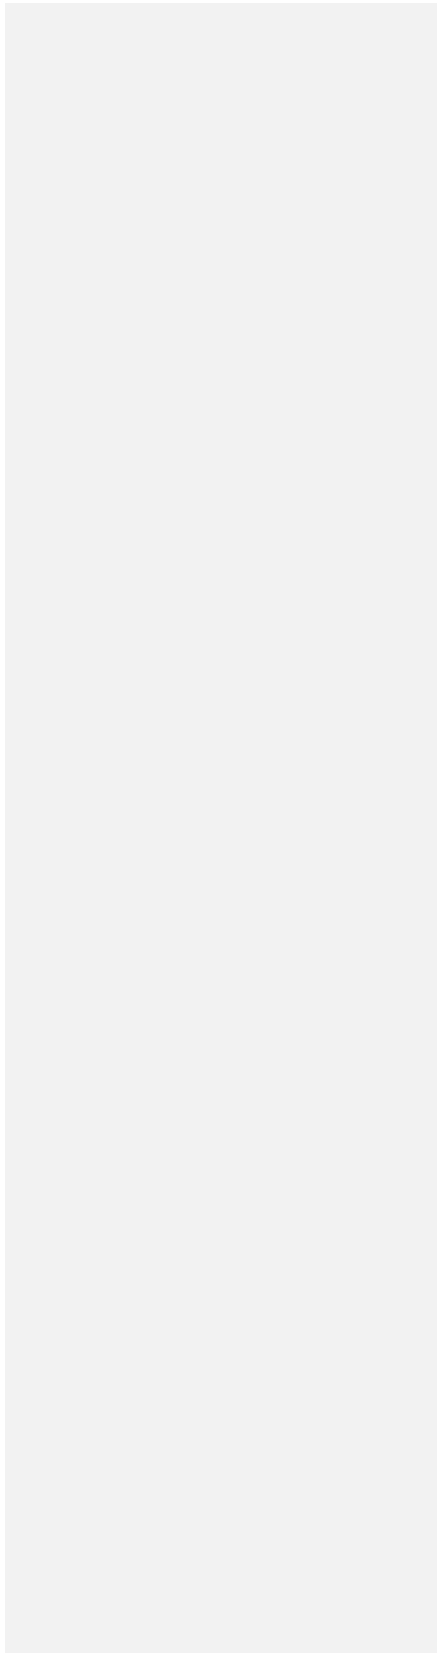

1  
2 **Systematic review of the accuracy of antibody tests used to screen asymptomatic adults for hepatitis C**  
3 **infection**  
4

5  
6 Geneviève Cadieux, PhD, MD<sup>1</sup>, Jennifer Campbell, MD, MPH<sup>1</sup>, Nandini Dendukuri, PhD<sup>2</sup>  
7  
8

9  
10 <sup>1</sup> University of Toronto, Dalla Lana School of Public Health

11 <sup>2</sup> McGill University, Department of Epidemiology, Biostatistics, and Occupational Health  
12  
13

14 **Corresponding author:**

15 Dr Geneviève Cadieux

16 c/o Public Health & Preventive Medicine Residency Program

17 Dalla Lana School of Public Health

18 University of Toronto

19 155 College St, 5<sup>th</sup> floor

20 Toronto, ON, M5T 3M7

21 Cell phone: 416-258-9396

22 Email: [genevieve.cadieux@mail.utoronto.ca](mailto:genevieve.cadieux@mail.utoronto.ca)  
23  
24  
25  
26

27 **Funding statement:**

28 No funding was received for this research.  
29  
30  
31

32 **Competing interests:**

33 The authors have no competing interests.  
34  
35

36 **Word count (max 2,500): 2,789**  
37  
38  
39  
40  
41  
42  
43  
44  
45  
46  
47  
48  
49  
50  
51  
52  
53  
54  
55  
56  
57  
58  
59  
60

1  
2  
3  
4  
5  
6  
7  
8  
9  
10  
11  
12  
13  
14  
15  
16  
17  
18  
19  
20  
21  
22  
23  
24  
25  
26  
27  
28  
29  
30  
31  
32  
33  
34  
35  
36  
37  
38  
39  
40  
41  
42  
43  
44  
45  
46  
47  
48  
49  
50  
51  
52  
53  
54  
55  
56  
57  
58  
59  
60**ABSTRACT**

**Background:** Several expert groups, including the United States Preventive Services Task Force and the Canadian Task Force on Preventive Health Care, have recently examined or are currently examining whether or not primary care physicians should screen asymptomatic adults for hepatitis C virus (HCV) infection. To inform decision-making on HCV screening, we performed a systematic review of the accuracy of antibody tests, as compared to other immunoassays and RNA detection, for screening asymptomatic adults for HCV infection.

**Methods:** MEDLINE and EMBASE databases were searched from 1990-2016; resulting citations were uploaded into DistillerSR and independently screened by 2 reviewers. Risk of bias was assessed using the QUADAS-2 tool; the quality of the 'body of evidence' was assessed using GRADE methodology.

**Results:** Of 1,537 articles identified, 81 underwent full-text review, and 9 studies met inclusion criteria. Compared to RNA detection, the sensitivity of ELISA v3.0 was variable (61.0%-81.8%) and the specificity was high (97.5%-99.7%). As expected, there were more false-positive results when comparing antibody tests to RNA detection than to other immunoassays; in fact, there were more false-positives than true-positives. Our GRADE assessment suggested that there was a high concern for risk of bias, particularly verification bias, and substantial inconsistency between studies in terms of their design.

**Interpretation:** More research is needed to better characterize the accuracy of antibody tests used to screen for HCV infection in the general population. Jurisdictions that recently adopted birth cohort screening for HCV infection are encouraged to evaluate and report on HCV screening test accuracy, and screening benefits and harms.

**PROSPERO registration:** #CRD42016039710



## INTRODUCTION

The incidence of hepatitis C virus (HCV) infection in Canada has declined in recent years (1;2), and the population prevalence of chronic HCV infection is estimated at 0.64-0.71% (2), which is approximately half of that of the United States (3). An estimated 21-44% of those Canadians with chronic HCV infection are unaware of their infection (1;2). In low-prevalence countries like Canada and the United Kingdom, the approach to HCV prevention and control has focused on case-finding (4;5), i.e., testing persons with risk factors for HCV infection, such as intravenous drug users and refugees from endemic countries. The recent development of costly but effective treatment for chronic hepatitis C (6) has led some to re-evaluate the evidence for/against population screening for HCV infection (7). In 2013, the United States Preventive Services Task Force revised their 2004 recommendation against screening asymptomatic adults for HCV infection (8); it now recommends one-time screening for all adults born between 1945 and 1965 (7). The Canadian Task Force on Preventive Health Care is currently examining whether or not primary care physicians should screen asymptomatic adults for HCV infection (9).

The World Health Organization (10;11) and the UK National Screening Committee's (12) guidance on when screening should be performed emphasizes the fundamental importance of having a 'safe, valid, and reliable' screening test. Screening for HCV infection typically relies on antibody testing. Because approximately 25% of HCV-infected persons spontaneously clear the infection (13) but antibodies may persist (14), antibody testing cannot discriminate current from resolved infections, leading to false-positive results (15). False-positive results can also occur from other antibodies interacting non-specifically with the test (16). False-positive results can cause harm (e.g., through labeling, anxiety). Therefore, individuals who screen positive typically undergo further testing, which has resource implications and may carry additional inherent risk. To inform decision-making on screening for chronic HCV infection, we performed a systematic review of the evidence on the accuracy of antibody tests used to screen asymptomatic adults for HCV infection.

## METHODS

### Laboratory tests for HCV

Laboratory tests for HCV can be divided into 3 categories based on what they detect: 1) antibodies to HCV, 2) antibodies to HCV and HCV core antigen (i.e., antigen-antibody tests), or 3) HCV RNA (16). Antibody tests include third-generation enzyme-linked immunosorbent assay (ELISA), chemiluminescent immunoassay (CLIA), electro chemiluminescent immunoassay (ECLIA), chemiluminescent microparticle immunoassay (CMIA), and

1  
2 microparticle enzyme immunoassay (MEIA). Each commercial antibody testing kit uses slightly different sets of  
3 HCV antigens to bind and detect host antibodies (Table 1). Antigen-antibody tests include fourth-generation  
4 ELISAs; because they detect antibodies to HCV, they would have the same issues with false-positives as 3<sup>rd</sup>  
5 generation ELISAs, but higher sensitivity because they also detect HCV antigen. Molecular techniques that  
6 detect HCV RNA, such as polymerase chain reaction (PCR) and nucleic acid testing (NAT), are recommended as  
7 confirmatory tests (17), even though immunocompromised and hemodialysis patients may have false-negative  
8 results (16). RNA-based testing can detect HCV before antibodies are produced (early infection) and can  
9 differentiate between current and resolved infection (i.e., fewer false-positives). It is important to note that  
10 there is no perfect reference standard for HCV infection, and the United States Centers for Disease Control and  
11 Prevention has recommended a testing strategy where the initial test is an antibody test, and the confirmatory  
12 test may be either RNA detection or serological methods similar to the index test (17).  
13  
14  
15  
16  
17  
18  
19  
20  
21

### 22 **Environmental scan of laboratory testing for HCV in Canada**

23  
24 To scope our systematic review, we first performed an environmental scan of laboratory testing for HCV in  
25 Canada. Given that provincial/territorial (P/T) laboratories generally perform the majority of HCV testing (18),  
26 one author (GC) searched the grey literature on P/T laboratory and CATIE websites, and contacted P/T  
27 laboratories by email in February 2016, on behalf of the Canadian Task Force for Preventive Health Care, to  
28 inquire about HCV testing (Appendix A). In a majority of P/T labs, the initial test used was an antibody test, such  
29 as CLIA (British Columbia, Northwest Territory, Saskatchewan), CMIA (Alberta, Manitoba, New Brunswick,  
30 Newfoundland & Labrador, Nova Scotia, Ontario), or MEIA (Quebec). Confirmatory testing was typically  
31 performed using another immunoassay, such as CMIA (British Columbia, Saskatchewan), CLIA (Ontario), fourth-  
32 generation ELISA (Alberta), or recombinant immunoblot assay (RIBA) (Manitoba, Quebec), rather than PCR  
33 (New Brunswick, Newfoundland & Labrador, Nova Scotia). Use of a different immunoassay to confirm HCV  
34 infection (19), rather than RNA detection, is also aligned with current US Centers for Disease Control and  
35 Prevention recommendations (17).  
36  
37  
38  
39  
40  
41  
42  
43  
44  
45  
46

### 47 **Research question**

48  
49 Our objective was to carry out a systematic review to estimate the accuracy of antibody tests used in Canada  
50 (i.e., CMIA, CLIA, ECLIA, MEIA, and ELISA version 3.0) to screen for HCV infection among asymptomatic, non-  
51 pregnant, treatment-naïve adults with unknown liver enzyme values. In the absence of a perfect reference  
52 standard, we used two different sets of reference tests: 1) inferior serological reference tests (CMIA, CLIA,  
53 ECLIA, MEIA, ELISA version 3.0+, RIBA) commonly used as confirmatory tests in Canada, and 2) superior RNA-  
54 based reference tests (PCR, NAT), which are less commonly used. We also sought to assess the accuracy of the  
55  
56  
57  
58  
59  
60

1  
2 two-step HCV screening procedure (i.e., the combination of the initial and confirmatory tests) currently used in  
3 Canada. The research protocol to answer this question was registered with PROSPERO (#CRD42016039710).  
4  
5  
6  
7

### 8 9 **Literature search strategy**

10 The literature search strategy was developed with the help of a librarian at the University of Toronto Gerstein  
11 Science Information Centre (Appendix B). Ovid MEDLINE® 1946 to present, Ovid MEDLINE® In-Process & Other  
12 Non-Indexed Citations, and Ovid EMBASE® were systematically searched using both controlled vocabulary and  
13 keywords. Because the oldest immunoassay of interest (ELISA v3.0) was first marketed in 1993 (20), retrieval  
14 was limited to articles published between January 1, 1990 and May 6, 2016. Language was restricted to English  
15 or French. Conference abstracts were excluded from the search results.  
16  
17  
18  
19  
20

### 21 22 23 **Selection criteria**

24 Original research studies, systematic reviews and meta-analyses were eligible for inclusion. At least 80% of the  
25 study population had to be asymptomatic, non-pregnant, treatment-naïve adults with unknown liver enzyme  
26 values and unknown HCV status (e.g., general population, blood donors); high-risk groups such as hemodialysis  
27 patients, transplant/transfusion recipients, intravenous drug users, patients co-infected with other blood-  
28 borne infections were excluded, as well as blood bank specimens that previously tested negative for HCV and  
29 specimen panels. The index test had to be one of CLIA, ECLIA, CMIA, MEIA, or ELISA v3.0; rapid tests, tests  
30 performed on specimens other than blood (e.g., saliva), and sero/genotyping tests were excluded. Within a  
31 given study, the reference test had to be different from the index test. In the absence of a perfect reference  
32 standard, two different sets of reference tests were eligible for inclusion: inferior serological reference tests  
33 (CMIA, CLIA, ECLIA, MEIA, ELISA version 3.0+, RIBA) and superior RNA-based reference tests (PCR, NAT). The  
34 reference test had to be applied to some subjects who tested positive on the index test as well as some of  
35 those who tested negative on the index test, so that a 2x2 table could be filled and sensitivity and/or specificity  
36 estimated. The setting had to resemble primary care (e.g., blood donation centre, population-based screening);  
37 hospital-based specialty clinics and inpatient hospital settings were excluded.  
38  
39  
40  
41  
42  
43  
44  
45  
46  
47  
48

### 49 50 **Selection method**

51 Using DistillerSR software, both reviewers (GC, JC) independently screened all titles and abstracts using the  
52 pre-determined selection criteria above. Potentially relevant articles were retrieved, and both reviewers (GC,  
53 JC) screened all full-text articles using the same selection criteria as above. Disagreements were resolved  
54 through discussion.  
55  
56  
57  
58  
59  
60

1  
2  
3  
4  
5  
6  
7  
8  
9  
10  
11  
12  
13  
14  
15  
16  
17  
18  
19  
20  
21  
22  
23  
24  
25  
26  
27  
28  
29  
30  
31  
32  
33  
34  
35  
36  
37  
38  
39  
40  
41  
42  
43  
44  
45  
46  
47  
48  
49  
50  
51  
52  
53  
54  
55  
56  
57  
58  
59  
60**Data extraction**

One reviewer (GC) extracted data on study characteristics and findings from each included study into Tables 2-4, as appropriate. Raw data was abstracted to create 2x2 tables of index test(s) compared to reference test(s) for each study. The second reviewer (JC) verified the accuracy and completeness of the other's data extraction. Disagreements were resolved through discussion. Authors of one included study were contacted (21) to obtain additional data not reported in the published article (22).

**Risk of bias assessment**

One reviewer (GC), with previous experience conducting validation studies (23;24) and performing statistical adjustment for verification bias (25), assessed the risk of bias and applicability of each included study using the Quality Assessment of Diagnostic Accuracy Studies (QUADAS-2) tool. QUADAS-2 focuses on four domains: patient selection, index test, reference test, as well as patient flow and timing of testing (26). The second reviewer (JC) verified the accuracy and completeness of the other's assessment. Disagreements were resolved through discussion.

**Statistical analyses**

Sensitivity, specificity, positive predictive value (PPV), negative predictive value (NPV), false-positive rate, false-negative rate, and 95% confidence intervals (CI) were estimated using the raw data (2x2 tables) extracted from the included studies. For studies that suffered from verification bias as a result of the sampling strategy used, statistical adjustment of sensitivity and specificity estimates (and therefore false-positive and false-negative rate) was performed (27). Given the small number of included studies and the heterogeneity of index-reference test pairings between studies, quantitative synthesis was not considered appropriate.

**Assessment of the quality of the 'body of evidence' using GRADE**

Whereas studies using inferior serological reference tests reflect current laboratory practice in several P/T, they likely underestimate the true number of false-positives. For this reason, we further restricted the 'body of evidence' to studies where the index test was an antibody test (reflecting current laboratory practice) and the reference test detected RNA. Two reviewers (GC, JC) independently used GRADE methodology for diagnostic testing accuracy studies (28-31) to assess the body of evidence; disagreements between reviewers were resolved through discussion. The GRADE criteria evaluate the evidence in terms of study design, risk of bias, indirectness, imprecision, and publication bias (31).

## RESULTS

### Literature search results and characteristics of included studies

1,537 articles were identified, of which 81 underwent full-text review, and 9 were included (Figure 1). A list of all excluded studies and each study's reason for exclusion is available in Appendix C. We did not identify any eligible studies that evaluated the two-step HCV screening procedure. Included studies (Table 2) were conducted in countries with low (15;32;33), moderate (34;35), and high (22;36-38) HCV prevalence (39).

### Accuracy of immunoassays as compared to other immunoassays

The sample size of studies comparing two immunoassays ranged from 106 to 5,208 (Table 3). For antibody tests compared to other antibody tests, sensitivity ranged from 70.4% to 99.5% and specificity ranged from 98.7% to 99.8%. For an antigen-antibody test compared to an antibody test, sensitivity ranged from 52.4% to 95.6% and specificity was over 99%.

### Accuracy of immunoassays as compared to RNA detection

The sample size of studies comparing an antibody test to RNA detection ranged from 106 to 21,115 (Table 4). For antibody tests compared to RNA detection, sensitivity ranged from 61.0% to 81.8% and specificity ranged from 97.5% to 99.7%. As expected, the antigen-antibody test performed better against RNA detection than the antibody tests did; its sensitivity was 90.2% and its specificity was 99.8%. Also as expected, the number of false-positive results was higher when comparing antibody tests to RNA detection than to other antibody tests; in fact, there were more false-positives than true-positives.

### Assessment of included studies' risk of bias using QUADAS-2

With respect to patient selection, only 2 studies involved routine HCV screening of the general population (22;32); the other 7 studies involved blood donor screening (15;33-38) (Appendix D – QUADAS-2 assessment). The 9 included studies reported on 11 different index—reference test pairings: 5 studies compared antibody tests to other antibody tests (15;22;32;33;36), 2 studies compared antigen-antibody tests to antibody tests (34;37), 3 studies compared antibody tests to RNA detection (21;22;36;38), and 1 study compared an antigen-antibody test to RNA detection (35). With respect to study flow and timing, 7 studies applied the index and reference tests to all samples in parallel (15;32;33;35-38); 2 studies (22;34) suffered from verification bias as a result of applying the reference test to a larger proportion of samples that had tested positive on the index test relative to those that had tested negative on the index test.

### Assessment of the quality of the 'body of evidence' using GRADE

Three studies comparing antibody tests to RNA detection were considered for inclusion in the 'body of evidence'. One study (22) was excluded because, as a result of there being zero false-negatives, the correction of the sensitivity estimate for verification bias was overly conservative (40) and the uncorrected sensitivity was too biased to be meaningful. Another study (36) was excluded because, based on its results, the study prevalence of HCV was 23.6%; this very high prevalence suggests that either the study population was not reflective of the general population or a case-control design was used (in either case, it did not meet our inclusion criteria). Findings from the remaining study (38) were assessed as 'very low' quality of evidence using GRADE (Table 5); this study reported a sensitivity of 81.8%, 95% CI (59.0-100%) and a specificity of 99.7%, 95% CI (99.6-99.8%). Assuming an HCV seroprevalence of 0.96% as in the general Canadian population (2), instead of the 0.1% prevalence among the 17,840 blood donors in the study (38), the PPV would be 72.7%, 95% CI (66.2-78.8%), and the NPV would be 99.8%, 95% CI (99.8-99.9%). Applying this study's findings to 1,000 individuals drawn from the general Canadian population (Table 5), we would expect 8, 95% CI (6-10) true-positives, 987, 95% CI (986-988) true-negatives, 3, 95% CI (2-4) false-positives, and 2, 95% CI (0-4) false-negatives.

### INTERPRETATION

We performed a systematic review of the evidence on the accuracy of antibody tests, as compared to other immunoassays and RNA detection, for screening asymptomatic adults for HCV infection. We found that the sensitivity of antibody tests was highly variable (52.4%-99.5%) and the specificity was high (97.5%-99.8%). The lack of a perfect reference test for HCV raises concerns that these estimates are biased. In particular, when an inferior serological reference test that shares the same risk of false-positives as the index test is used, the specificity could be overestimated. As expected, we found that there were more false-positive results when comparing antibody tests to superior RNA-based reference tests, than to inferior serological reference tests; in fact, there were more false-positives than true-positives owing to the very low prevalence of HCV. Bias correction of the specificity estimate could make the difference even greater. This finding highlights a potential problem with using an inferior serological reference test as a confirmatory test (17;19) when screening the general population for HCV infection. Our assessment of the 'body of evidence' using GRADE methodology led us to focus on a single 'least biased' study (38), which reported the sensitivity of ELISA v3.0 compared to NAT as 81.8%, 95% CI (59.0%-100%), its specificity as 99.8%, 95% CI (99.7%-99.8%), and its PPV as 13.8%, 95% CI (5.4-22.2).

1  
2  
3  
4 The only other systematic review of HCV antibody test accuracy was performed in the context of the United  
5 States Preventive Services Task Force's 2004 recommendation on HCV screening. However, the populations of  
6 the studies included in that review (i.e., hemodialysis patients, patients with histologically-verified hepatitis,  
7 patients hospitalized with suspected acute/chronic hepatitis, blood donors with persistently elevated liver  
8 enzymes, and blood donors who previously screened positive for HCV) did not reflect the general population,  
9 therefore those findings are not directly comparable to ours (8;20). When the United States Preventive  
10 Services Task Force revised its recommendation on HCV screening in 2013, it did not re-assess HCV screening  
11 test accuracy, despite the introduction of new immunoassays (i.e., CLIA, ECLIA, CMIA, MEIA) since its 2004  
12 systematic review (3). Similarly, when the WHO published its HCV screening guideline in 2014 (41), it did not  
13 re-assess screening test accuracy, instead citing a 2001 report (42) on simple/rapid test accuracy and a 2002  
14 report (43) on ELISA v3.0+ immunoassay accuracy, both involving blood panels not reflective of the general  
15 population. Because antibody tests have not been adequately evaluated for population-based HCV screening,  
16 and because the availability of a 'safe, valid, and reliable' screening test is a fundamental consideration of any  
17 screening recommendation or program (10-12), this highlights a knowledge gap and brings into question the  
18 evidence basis for these recommendations.  
19  
20  
21  
22  
23  
24  
25  
26  
27  
28  
29

30  
31 Our findings are limited by the paucity and the low quality of the available evidence published in English or  
32 French. In particular, we were unable to locate any studies of the accuracy of CLIA, CMIA, or MEIA (the HCV  
33 screening tests most commonly used in Canada) as compared to RNA detection for HCV screening in the  
34 general population. The applicability of our findings to the general Canadian population is limited because a  
35 majority of included studies were conducted among blood donors, and persons eligible to donate blood are at  
36 lower risk of blood-borne infections like HCV than the general population. Rapid and point-of-care tests were  
37 beyond the scope of our review; whereas those tests are important for reaching some vulnerable populations,  
38 a majority of HCV testing in Canada is laboratory-based (18); also, a systematic review of the accuracy of rapid  
39 tests was recently published (44).  
40  
41  
42  
43  
44  
45  
46  
47

48  
49 In conclusion, the availability of a 'safe, valid, and reliable' screening test is a primordial consideration for  
50 decision-making about screening (10-12), but our study has shown that further research is needed to  
51 adequately characterize the accuracy of antibody tests used to screen the general population for HCV infection.  
52 Our study focused on the accuracy of HCV screening tests; however, several other important factors must be  
53 considered when making decisions about HCV screening, including: the benefits and harms of screening, the  
54 benefits and harms of treatment for screen-detected cases, the cost-effectiveness of screening, as well as  
55  
56  
57  
58  
59  
60



1  
2  
3  
4  
5  
6  
7  
8  
9  
10  
11  
12  
13  
14  
15  
16  
17  
18  
19  
20  
21  
22  
23  
24  
25  
26  
27  
28  
29  
30  
31  
32  
33  
34  
35  
36  
37  
38  
39  
40  
41  
42  
43  
44  
45  
46  
47  
48  
49  
50  
51  
52  
53  
54  
55  
56  
57  
58  
59  
60

patient preferences related to screening. A review of the evidence related to these considerations is beyond the scope of the present study, but such a review is being performed by others in the context of the Canadian Task Force on Preventive Health Care’s upcoming guidelines on HCV screening. To help inform decision-making about HCV screening, we encourage jurisdictions that have already adopted population-based (birth cohort) screening for HCV to carefully evaluate and report on the accuracy of antibody tests, as well as screening benefits and harms.

**ACKNOWLEDGEMENTS**

We are grateful to Dr Roland Grad and Alejandra Jaramillo, members of the working group on HCV screening of the Canadian Task Force for Preventive Health Care, for their helpful comments on our study design, findings, and manuscript. We would also like to thank Dr Barry Pakes, Public Health & Preventive Medicine residency program director at the University of Toronto, for his support and editorial suggestions.

Confidential



## REFERENCES

- (1) Public Health Agency of Canada (PHAC). Hepatitis C in Canada: 2005-2010 Surveillance Report. 2012. Available from: [http://publications.gc.ca/collections/collection\\_2012/aspc-phac/HP40-70-2012-eng.pdf](http://publications.gc.ca/collections/collection_2012/aspc-phac/HP40-70-2012-eng.pdf)
- (2) Trubnikov M, Yan P, Archibald C. Estimated prevalence of hepatitis C virus infection in Canada, 2011. *CCDR* 2014;40(19):429-36.
- (3) Chou R, Cottrell EB, Wasson N, Rahman B, Guise JM. Screening for hepatitis C virus infection in adults: a systematic review for the U.S. Preventive Services Task Force. *Ann Intern Med* 2013 Jan 15;158(2):101-8.
- (4) Provincial Infectious Disease Advisory Committee (PIDAC). Recommendations for the Public Health Response to Hepatitis C in Ontario. 2014. Available from: [https://www.publichealthontario.ca/en/BrowseByTopic/InfectiousDiseases/PIDAC/Pages/PIDAC\\_Documents.aspx#.V1TB0pOzl\\_k](https://www.publichealthontario.ca/en/BrowseByTopic/InfectiousDiseases/PIDAC/Pages/PIDAC_Documents.aspx#.V1TB0pOzl_k)
- (5) National Health Service (NHS). Hepatitis C: Essential information for professionals and guidance on testing. 2004. Available from: <http://www.nhs.uk/hepatitisc/SiteCollectionDocuments/pdf/essential-information-for-professionals-and-guidance-on-testing.pdf>
- (6) Kohli A, Shaffer A, Sherman A, Kottitil S. Treatment of hepatitis C: a systematic review. *JAMA* 2014 Aug 13;312(6):631-40.
- (7) Moyer VA. Screening for hepatitis C virus infection in adults: U.S. Preventive Services Task Force recommendation statement. *Ann Intern Med* 2013 Sep 3;159(5):349-57.
- (8) Chou R, Clark EC, Helfand M. Screening for hepatitis C virus infection: a review of the evidence for the U.S. Preventive Services Task Force. *Ann Intern Med* 2004 Mar 16;140(6):465-79.
- (9) Canadian Task Force on Preventive Health Care (CTFPHC). Recommendations on Screening for Hepatitis C. Last updated: 11-19-2015. Accessed: 6-12-2016. <http://canadiantaskforce.ca/ctfphc-guidelines/2015-hepatitis-c/guidelines-on-screening-for-hepatitis-c/>
- (10) Wilson JM, Jungner YG. [Principles and practice of mass screening for disease]. *Bol Oficina Sanit Panam* 1968 Oct;65(4):281-393.
- (11) Andermann A, Blancquaert I, Beauchamp S, Dery V. Revisiting Wilson and Jungner in the genomic age: a review of screening criteria over the past 40 years. *Bulletin of the World Health Organization* 2008;86(4):317-9.
- (12) Public Health England (PHE). Criteria for appraising the viability, effectiveness and appropriateness of a screening programme. Last updated: 10-23-2015. Accessed: 4-27-2016. <https://www.gov.uk/government/publications/evidence-review-criteria-national-screening-programmes/criteria-for-appraising-the-viability-effectiveness-and-appropriateness-of-a-screening-programme>
- (13) Hajarizadeh B, Grebely J, Dore GJ. Epidemiology and natural history of HCV infection. *Nat Rev Gastroenterol Hepatol* 2013 Sep;10(9):553-62.

- 1  
2 (14) Giuberti T, Ferrari C, Marchelli S, Degli Antoni AM, Schianchi C, Pizzaferrri P, et al. Long-term follow-up  
3 of anti-hepatitis C virus antibodies in patients with acute nonA nonB hepatitis and different outcome  
4 of liver disease. *Liver* 1992 Apr;12(2):94-9.  
5  
6 (15) Denoyel G, van HJ, Bauer R, Preisel-Simmons B. Performance of a new hepatitis C assay on the Bayer  
7 ADVIA Centaur Immunoassay System. *Clin Lab* 2004;50(1-2):75-82.  
8  
9 (16) Saludes V, Gonzalez V, Planas R, Matas L, Ausina V, Martro E. Tools for the diagnosis of hepatitis C  
10 virus infection and hepatic fibrosis staging. *World J Gastroenterol* 2014 Apr 7;20(13):3431-42.  
11  
12 (17) Testing for HCV infection: an update of guidance for clinicians and laboratorians. *MMWR Morb*  
13 *Mortal Wkly Rep* 2013 May 10;62(18):362-5.  
14  
15 (18) CATIE. Hepatitis C: Testing in your region. Last updated: 2010. Accessed: 2-22-2016.  
16 <http://www.catie.ca/en/practical-guides/hepc-in-depth/testing/testing-your-region>  
17  
18 (19) Vermeersch P, Van RM, Lagrou K. Validation of a strategy for HCV antibody testing with two enzyme  
19 immunoassays in a routine clinical laboratory. *J Clin Virol* 2008 Aug;42(4):394-8.  
20  
21 (20) Colin C, Lanoir D, Touzet S, Meyaud-Kraemer L, Bailly F, Trepo C. Sensitivity and specificity of third-  
22 generation hepatitis C virus antibody detection assays: an analysis of the literature. *J Viral Hepat*  
23 2001 Mar;8(2):87-95.  
24  
25 (21) Benouda A. Email communication regarding results for the 2x2 table of ELISA v3.0 compared to PCR.  
26 2-22-2016.  
27  
28 (22) Benouda A, Boujdiya Z, Ahid S, Abouqal R, Adnaoui M. [Prevalence of hepatitis C virus infection in  
29 Morocco and serological tests assessment of detection for the viremia prediction]. *Pathol Biol (Paris)*  
30 2009 Jul;57(5):368-72.  
31  
32 (23) Cadieux G, Tamblyn R. Accuracy of Physician Billing Claims for Identifying Acute Respiratory  
33 Infections in Primary Care. *Health Services Research* 2008 Dec;43(6):2223-38.  
34  
35 (24) Cadieux G, Buckeridge DL, Jacques A, Libman M, Dendukuri N. Accuracy of Syndrome Definitions  
36 Based on Diagnoses in Physician Claims. *BMC Public Health* 2011 Jan 7;11:17-26.  
37  
38 (25) Cadieux G, Tamblyn R, Buckeridge DL, Dendukuri N. Validation of Diagnostic Groups Based on Health  
39 Care Utilization Data Should Adjust for Sampling Strategy. *Med Care* 2015 Mar 27.  
40  
41 (26) Whiting PF, Rutjes AW, Westwood ME, Mallett S, Deeks JJ, Reitsma JB, et al. QUADAS-2: a revised  
42 tool for the quality assessment of diagnostic accuracy studies. *Ann Intern Med* 2011 Oct  
43 18;155(8):529-36.  
44  
45 (27) Irwig L, Glasziou PP, Berry G, Chock C, Mock P, Simpson JM. Efficient Study Designs to Assess the  
46 Accuracy of Screening-Tests. *Am J Epidemiol* 1994 Oct 15;140(8):759-69.  
47  
48 (28) Schunemann HJ, Oxman AD, Brozek J, Glasziou P, Jaeschke R, Vist GE, et al. Grading quality of  
49 evidence and strength of recommendations for diagnostic tests and strategies. *BMJ* 2008 May  
50 17;336:1106-10.  
51  
52  
53  
54  
55  
56  
57  
58  
59  
60

- 1  
2  
3  
4  
5  
6  
7  
8  
9  
10  
11  
12  
13  
14  
15  
16  
17  
18  
19  
20  
21  
22  
23  
24  
25  
26  
27  
28  
29  
30  
31  
32  
33  
34  
35  
36  
37  
38  
39  
40  
41  
42  
43  
44  
45  
46  
47  
48  
49  
50  
51  
52  
53  
54  
55  
56  
57  
58  
59  
60
- (29) Brozek JL, Akl EA, Jaeschke R, Lang DM, Bossuyt P, Glasziou P, et al. Grading quality of evidence and strength of recommendations in clinical practice guidelines: Part 2 of 3. The GRADE approach to grading quality of evidence about diagnostic tests and strategies. *Allergy* 2009 Aug;64(8):1109-16.
- (30) Hsu J, Brozek JL, Terracciano L, Kreis J, Compalati E, Stein AT, et al. Application of GRADE: making evidence-based recommendations about diagnostic tests in clinical practice guidelines. *Implement Sci* 2011;6:62.
- (31) Gopalakrishna G, Mustafa RA, Davenport C, Scholten RJ, Hyde C, Brozek J, et al. Applying Grading of Recommendations Assessment, Development and Evaluation (GRADE) to diagnostic tests was challenging but doable. *J Clin Epidemiol* 2014 Jul;67(7):760-8.
- (32) Park Y, Seok Y, Choi J, Kim HS. Performance evaluation of the Vitros anti-hepatitis C virus antibody assay for use in clinical laboratories. *Clin Biochem* 2012 Jan;45(1-2):175-7.
- (33) Sommese L, Sabia C, Paolillo R, Parente D, Capuano M, Iannone C, et al. Screening tests for hepatitis B virus, hepatitis C virus, and human immunodeficiency virus in blood donors: evaluation of two chemiluminescent immunoassay systems. *Scand J Infect Dis* 2014 Sep;46(9):660-4.
- (34) Ol HS, Bjoerkvoll B, Sothy S, Van HY, Hoel H, Husebekk A, et al. Prevalence of hepatitis B and hepatitis C virus infections in potential blood donors in rural Cambodia. *Southeast Asian J Trop Med Public Health* 2009 Sep;40(5):963-71.
- (35) Arora S, Doda V. Role of signal-to-cut-off ratios of anti-hepatitis C virus antibody by enzyme immunoassays along with ID-NAT for screening of whole blood donors in India. *Asian J Transfus Sci* 2016 Jan;10(1):75-8.
- (36) Tashkandy MA, Khodari YA, Ibrahim AM, Dhafar KO, Gazzaz ZJ, Azab BA. Evaluation of the available anti-HCV antibody detection tests and RT-PCR assay in the diagnosis of hepatitis C virus infection. *Saudi J Kidney Dis Transpl* 2007 Nov;18(4):523-31.
- (37) Rao HY, Ren FR, Guan WL, Houde M, Du SC, Liu CL, et al. Evaluation of the performance of the EIAGEN HCV test for detection of hepatitis C virus infection. *J Virol Methods* 2009 Dec;162(1-2):203-7.
- (38) Kosan E, Kocazeybek B, Altunay H, Aymelek M, Alan E, Saribas S, et al. Can the nucleic acid amplification test (NAT) be an alternative to the serologic tests? A prospective study, the results of 18,200 blood donors from the Turkish Red Crescent. *Transfus Apher Sci* 2010 Dec;43(3):269-72.
- (39) Mohd HK, Groeger J, Flaxman AD, Wiersma ST. Global epidemiology of hepatitis C virus infection: new estimates of age-specific antibody to HCV seroprevalence. *Hepatology* 2013 Apr;57(4):1333-42.
- (40) Cronin AM, Vickers AJ. Statistical methods to correct for verification bias in diagnostic studies are inadequate when there are few false negatives: a simulation study. *BMC Med Res Methodol* 2008;8:75.
- (41) World Health Organization (WHO). Guidelines for the screening, care and treatment of persons with hepatitis C infection. 2014 Apr. Available from: <http://www.who.int/hiv/pub/hepatitis/hepatitis-c-guidelines/en/>
- (42) World Health Organization (WHO). Hepatitis C Assays: Operational Characteristics (Phase I) Report 1. 2001 Jan. Available from: <http://apps.who.int/medicinedocs/en/d/Js15208e/>

1  
2  
3  
4  
5  
6  
7  
8  
9  
10  
11  
12  
13  
14  
15  
16  
17  
18  
19  
20  
21  
22  
23  
24  
25  
26  
27  
28  
29  
30  
31  
32  
33  
34  
35  
36  
37  
38  
39  
40  
41  
42  
43  
44  
45  
46  
47  
48  
49  
50  
51  
52  
53  
54  
55  
56  
57  
58  
59  
60

(43) World Health Organization (WHO). Hepatitis C Assays: Operational Characteristics (Phase I) Report 2. 2001 Jul. Available from: <http://apps.who.int/iris/handle/10665/67061>

(44) Shivkumar S, Peeling R, Jafari Y, Joseph L, Pant PN. Accuracy of rapid and point-of-care screening tests for hepatitis C: a systematic review and meta-analysis. *Ann Intern Med* 2012 Oct 16;157(8):558-66.

Confidential

**Table 1. Screening tests for HCV based on antibody detection**

| Antibody test                    | Examples of assays (manufacturer)                                                                                                                                          | Antigens (region of the genome)                                                                                                                      |
|----------------------------------|----------------------------------------------------------------------------------------------------------------------------------------------------------------------------|------------------------------------------------------------------------------------------------------------------------------------------------------|
| 3 <sup>rd</sup> generation ELISA | <ul style="list-style-type: none"> <li>▪ ORTHO HCV 3.0 ELISA (Ortho)</li> </ul>                                                                                            | <ul style="list-style-type: none"> <li>▪ c100-3 (NS3-NS4)</li> <li>▪ c33-c (NS3)</li> <li>▪ c22-3 (core)</li> <li>▪ NS5</li> </ul>                   |
| CLIA                             | <ul style="list-style-type: none"> <li>▪ ARCHITECT i4000 anti-HCV assay (Abbott)</li> <li>▪ VITROS Eci anti-HCV assay (Ortho)</li> <li>▪ ADVIA Centaur, Siemens</li> </ul> | <ul style="list-style-type: none"> <li>▪ c22-3 (core)</li> <li>▪ c200 (NS3 - NS4)</li> <li>▪ NS5</li> </ul>                                          |
| ECLIA                            | <ul style="list-style-type: none"> <li>▪ Elecsys anti-HCV assay (Roche)</li> </ul>                                                                                         | <ul style="list-style-type: none"> <li>▪ Core</li> <li>▪ NS3</li> <li>▪ NS4</li> </ul>                                                               |
| CMIA                             | <ul style="list-style-type: none"> <li>▪ ARCHITECT® anti-HCV (Abbott)</li> </ul>                                                                                           | <ul style="list-style-type: none"> <li>▪ HCr43 (core-NS3)</li> <li>▪ c100-3 (NS3-NS4)</li> </ul>                                                     |
| MEIA                             | <ul style="list-style-type: none"> <li>▪ AxSYM® HCV 3.0 (Abbott)</li> </ul>                                                                                                | <ul style="list-style-type: none"> <li>▪ HCr43 (Fusion core e NS3)</li> <li>▪ c200 (NS3 - NS4)</li> <li>▪ c100-3 (NS3-NS4)</li> <li>▪ NS5</li> </ul> |

Source: Villar LM, *et al.* Update on hepatitis B and C virus diagnosis. *World Journal of Virology*. 2015; 4(4): 323-42.

1  
2  
3  
4  
5  
6  
7  
8  
9  
10  
11  
12  
13  
14  
15  
16  
17  
18  
19  
20  
21  
22  
23  
24  
25  
26  
27  
28  
29  
30  
31  
32  
33  
34  
35  
36  
37  
38  
39  
40  
41  
42  
43  
44  
45  
46  
47  
48  
49

**Table 2. Characteristics of included studies**

| Study           | Country (HCV prevalence <sup>1</sup> ) | Setting & study period                                                                    | Funding source & conflict(s) of interests | Study population                                                                                                             | Study flow & timing                                                                                                                                                                                                          | Index test(s)                       | Reference test(s)                                                                                          |
|-----------------|----------------------------------------|-------------------------------------------------------------------------------------------|-------------------------------------------|------------------------------------------------------------------------------------------------------------------------------|------------------------------------------------------------------------------------------------------------------------------------------------------------------------------------------------------------------------------|-------------------------------------|------------------------------------------------------------------------------------------------------------|
| Denoyel, 2004   | France (low)                           | NR                                                                                        | NR                                        | 5,228 individuals: 5,015 random blood donors and 213 hospitalized patients                                                   | Not specified; based on results, all samples underwent both the index and reference tests                                                                                                                                    | CLIA (ADVIA Centaur® HCV assay)     | MEIA (AxSYM® HCV v.3.0 assay, Abbott)                                                                      |
| Tashkandy, 2007 | Saudi Arabia (high)                    | Immunology and Serology Department, Al-Noor Specialist Hospital, Makkah; study period: NR | NR                                        | 106 male blood donors; samples from patients with diabetes or other endocrine diseases and autoimmune diseases were excluded | All samples were aliquoted into two portions: one for PCR, the other for serological testing                                                                                                                                 | ELISA v3.0 (Murex anti-HCV, Abbott) | LIA (INNo-LIA HCV Ab III Update, Innogenetics)<br>RT-PCR (High Pure Viral Nucleic Acid reagent set, Roche) |
| Benouda, 2009   | Morocco (high)                         | Workplace blood specimen collection; December 2005 to April 2007                          | NR                                        | 8,326 adults from the general population with unknown HCV serology                                                           | A subset of 158/161 (98%) ELISA-positive and 100/8,165 (1%) ELISA-negative adults were called back to undergo the reference standard (verification bias); 3/161 lost to follow-up; time interval between tests not specified | ELISA v3.0 (Murex anti-HCV, Abbott) | MEIA (AxSYM® HCV v.3.0 assay, Abbott)<br>RT-PCR (Amplicor HCV® v2.0, Roche)                                |

| Study     | Country (HCV prevalence <sup>1</sup> ) | Setting & study period                                                                      | Funding source & conflict(s) of interests                                                                                                                                                                                    | Study population                                                                                                                                                                                                               | Study flow & timing                                                                                                                                                                                        | Index test(s)                  | Reference test(s)                |
|-----------|----------------------------------------|---------------------------------------------------------------------------------------------|------------------------------------------------------------------------------------------------------------------------------------------------------------------------------------------------------------------------------|--------------------------------------------------------------------------------------------------------------------------------------------------------------------------------------------------------------------------------|------------------------------------------------------------------------------------------------------------------------------------------------------------------------------------------------------------|--------------------------------|----------------------------------|
| Rao, 2009 | China (high)                           | Beijing Red Cross Blood Center and Peking University Hepatology Institute; study period: NR | Grants from the Chinese Basic Research Foundation, National Science and Technology Key Project, and Key Clinical Research Program of Ministry of Health; conflict(s) of interest: NR, but one author affiliated with Aldatis | 2,559 individuals: 2,082 blood donors (Beijing Red Cross Blood Center) and 477 (18.6%) patients (Peking University Hepatology Institute; including various HCV genotypes, non-C hepatitis, pregnant women, and lipidemia sera) | All samples underwent both the index and reference tests "side-by-side"                                                                                                                                    | ELISA v4.0 (EIAgen, Adaltis)   | ELISA v3.0 (Ortho HCV 3.0 ELISA) |
| OI, 2009  | Cambodia (moderate)                    | Rural areas of 2 Cambodian provinces: Battambang and Pailin; May to June 2007               | Sponsored by the European Plasma Fraction Foundation and Tromsø Mine Victim Resource Center, University Hospital, North Norway; conflict(s) of interest: NR                                                                  | 1,200 potential volunteer blood donors: 677 females, 523 males, mean age: 32.8 years, age range 18-52 year; sample stratified by province (600 each)                                                                           | A subset of 80/176 (45%) ELISA-positive and 40/1,024 (4%) ELISA-negative samples were selected to undergo the reference test (verification bias); all samples underwent both the index and reference tests | ELISA v4.0 (Monolisa™, BioRad) | CMIA (Abbott)                    |

1  
2  
3  
4  
5  
6  
7  
8  
9  
10  
11  
12  
13  
14  
15  
16  
17  
18  
19  
20  
21  
22  
23  
24  
25  
26  
27  
28  
29  
30  
31  
32  
33  
34  
35  
36  
37  
38  
39  
40  
41  
42  
43  
44  
45  
46  
47  
48  
49

| Study         | Country (HCV prevalence <sup>1</sup> ) | Setting & study period                                                                              | Funding source & conflict(s) of interests                                                                                                                                       | Study population                                                                                                                                                                                                                     | Study flow & timing                                                                                                         | Index test(s)                                  | Reference test(s)                    |
|---------------|----------------------------------------|-----------------------------------------------------------------------------------------------------|---------------------------------------------------------------------------------------------------------------------------------------------------------------------------------|--------------------------------------------------------------------------------------------------------------------------------------------------------------------------------------------------------------------------------------|-----------------------------------------------------------------------------------------------------------------------------|------------------------------------------------|--------------------------------------|
| Kosan, 2010   | Turkey (high)                          | Turkish Red Crescent Çapa Blood Centre of Istanbul; intermittently from February 2007 to March 2008 | “No role for sponsors in our study”; “there are no financial or personal relationships with other people or organisations that could inappropriately influence (bias) our work” | 18,200 volunteer blood donors: 546 (3%) were women, 17,654 (97%) were men, 18,198 (99.9%) were first-time donors, mean age: 40 years, age range: 18-60 years; individuals underwent a mandatory physical exam prior to blood drawing | For each subject, two sets of blood samples were collected: one underwent serological testing and one underwent NAT testing | ELISA v3.0 (Innotest HCV Ab III, Innogenetics) | NAT (Procleix Ultrio kit, Chiron)    |
| Park, 2012    | South Korea (low)                      | “Routine HCV screening”; August 2009 to January 2011                                                | Funding source not reported, but Ortho provided the CLIA assay kits; conflict(s) of interest: NR                                                                                | 1,011 sera from individuals undergoing routine HCV screening                                                                                                                                                                         | Not specified; based on results, all samples underwent both the index and reference test                                    | CLIA (Vitros Anti-HCV assay)                   | ECLIA (Elecsys anti-HCV test, Roche) |
| Sommese, 2014 | Italy (low)                            | Volunteer blood donors, Second University of Naples; January to June 2013                           | “The authors do not have any conflicts of interest to declare. No funding was received.”                                                                                        | 840 volunteer blood donors: 275 (32.7%) were women, 564 (67.3%) men, mean age: 37.7 years (SD 12.5 years)                                                                                                                            | All samples underwent both the index and reference test in parallel                                                         | CMIA (Architect i200SR, Abbott)                | ECLIA (Cobas e411, Roche)            |
| Arora, 2016   | India (moderate)                       | Blood bank; January 2013 to March 2014                                                              | “Financial support and sponsorship: Nil. Conflicts of interest: there are no conflicts of interest.”                                                                            | 21,115 blood donors                                                                                                                                                                                                                  | All samples underwent both the index and reference test in parallel                                                         | ELISA v4.0 (Monolisa Ag-Ab Ultra, BioRad)      | NAT (Procleix Ultrio kit, Chiron)    |

<sup>1</sup> Country HCV prevalence is categorized as low (<1.5%), moderate (1.5-3.5%), or high (>3.5%), as per Hanafiah *et al.*, 2013.(38)  
Abbreviations: NR: not reported; ELISA: enzyme-linked immunosorbent assay; CLIA: chemiluminescent immunoassay; CMIA: chemiluminescent microparticle immunoassay; MEIA: microparticle enzyme immunoassay; LIA: line immunoassay; RIBA: recombinant immunoblot assay; NAT: nucleic acid amplification test; PCR: polymerase chain reaction; RT-PCR: reverse-transcription polymerase chain reaction.



**Table 3. Accuracy of HCV screening immunoassays as compared to serological reference tests**

| Study                                                                    | Index test                          | Serological reference test                    | TP  | FP | FN             | TN    | Pr (%) | Sn (%) (95% CI)               | Sp (%) (95% CI)               | PPV (%) (95% CI) | NPV (%) (95% CI) | FP rate (%) (95% CI)       | FN rate (%) (95% CI)          |
|--------------------------------------------------------------------------|-------------------------------------|-----------------------------------------------|-----|----|----------------|-------|--------|-------------------------------|-------------------------------|------------------|------------------|----------------------------|-------------------------------|
| <i>Immunoassays that detect only antibodies to HCV</i>                   |                                     |                                               |     |    |                |       |        |                               |                               |                  |                  |                            |                               |
| Denoyel, 2004                                                            | CLIA (ADVIA Centaur® HCV assay)     | MEIA (AxSYM® HCV v3.0 assay, Abbott)          | NR  | 9  | NR             | 5,199 | -      | -                             | 99.8 (99.7-99.9)              | -                | -                | 0.2 (0.1-0.3)              | -                             |
| Tashkandy, 2007                                                          | ELISA v3.0 (Murex anti-HCV, Abbott) | LIA (INNo-LIA HCVAb III Update, Innogenetics) | 19  | 1  | 8 <sup>†</sup> | 78    | 25.4   | 70.4 (53.1-87.6)              | 98.7 (96.3-100)               | 95.0 (85.4-100)  | 90.7 (84.6-96.8) | 1.3 (0-3.7)                | 29.6 (12.4-46.9)              |
| Benouda, 2009                                                            | ELISA V3.0 (Murex anti-HCV, Abbott) | MEIA (AxSYM® HCV v.3.0 assay, Abbott)         | 100 | 58 | 0              | 100   | 38.8   | 71.6 (13.6-97.6) <sup>‡</sup> | 99.3 (99.0-99.5) <sup>‡</sup> | 63.3 (55.8-70.8) | 100 (100-100)    | 0.7 (0.5-1.0) <sup>‡</sup> | 28.4 (2.4-86.4) <sup>‡</sup>  |
| Park, 2012                                                               | CLIA (Vitros Anti-HCV assay)        | ECLIA (Elecsys anti-HCV test, Roche)          | 213 | 3  | 1              | 794   | 8.8    | 99.5 (98.6-100)               | 99.6 (99.2-100)               | 98.6 (97.1-100)  | 99.9 (99.6-100)  | 0.4 (0-0.8)                | 0.5 (0-1.4)                   |
| Sommese, 2014                                                            | CMIA (Architect i200SR, Abbott)     | ECLIA (Cobas e411, Roche)                     | 17  | 8  | 2              | 813   | 69.2   | 89.5 (75.7-100)               | 99.0 (98.4-99.7)              | 68.0 (49.7-86.3) | 99.8 (99.4-100)  | 1.0 (0.3-1.6)              | 10.5 (0-24.3)                 |
| <i>Immunoassay that detects both antibodies to HCV and viral antigen</i> |                                     |                                               |     |    |                |       |        |                               |                               |                  |                  |                            |                               |
| Rao, 2009                                                                | ELISA v4.0 (EIAgen, Adaltis)        | ELISA v3.0 (Ortho HCV 3.0 ELISA)              | 216 | 4  | 10             | 2,329 | 21.2   | 95.6 (92.9-98.3)              | 99.8 (99.7-100)               | 98.2 (96.4-99.9) | 99.6 (99.3-99.8) | 0.2 (0-0.3)                | 4.4 (1.7-7.1)                 |
| Ol, 2009                                                                 | ELISA v4.0 (Monolisa™, BioRad)      | CMIA (Abbott)                                 | 77  | 3  | 6              | 34    | 2.3    | 52.4 (34.1-70.1) <sup>‡</sup> | 99.2 (96.4-99.8) <sup>‡</sup> | 96.3 (92.1-100)  | 85.0 (73.9-96.1) | 0.8 (0.2-3.6) <sup>‡</sup> | 47.6 (29.9-65.9) <sup>‡</sup> |

Abbreviations: Pr: prevalence in the study; TP: true-positives; FN: false-negatives; FP: false-positives; TN: true-negatives; Sn: sensitivity; Sp: specificity; PPV: positive predictive value; NPV: negative predictive value; FP rate: false-positive rate; FN rate: false-negative rate. ELISA: enzyme-linked immunosorbent assay; CLIA: chemiluminescent immunoassay; ECLIA: electrochemiluminescent immunoassay; CMIA: chemiluminescent microparticle immunoassay; MEIA: microparticle enzyme immunoassay; LIA: line immunoassay; RIBA: recombinant immunoblot assay; NAT: nucleic acid amplification test; PCR: polymerase chain reaction; RT-PCR: reverse-transcription polymerase chain reaction. NR: not reported.

<sup>†</sup>Tashkandy, 2007 report the number of RIBA-positive samples as 22±5 (i.e., 5 borderline-positive samples); whereas they exclude those 5 samples from their analyses (bringing the total sample size to 101 from 106), the preferred and more conservative analysis includes the 5 borderline samples, so that FN=8 instead of FN=3.

<sup>‡</sup>Adjusted for verification bias.(44)

**Table 4. Accuracy of HCV screening immunoassays as compared to RNA detection**

| Study                                                                    | Index test                                     | RNA-based reference test                                 | TP | FP | FN | TN     | Pr (%) | Sn (%) (95% CI)              | Sp (%) (95% CI)               | PPV (%) (95% CI) | NPV (%) (95% CI) | FP rate (%) (95% CI)       | FN rate (%) (95% CI)         |
|--------------------------------------------------------------------------|------------------------------------------------|----------------------------------------------------------|----|----|----|--------|--------|------------------------------|-------------------------------|------------------|------------------|----------------------------|------------------------------|
| <i>Immunoassays that detect only antibodies to HCV</i>                   |                                                |                                                          |    |    |    |        |        |                              |                               |                  |                  |                            |                              |
| Tashkandy, 2007                                                          | ELISA v3.0 (Murex anti-HCV, Abbott)            | RT-PCR (High Pure Viral Nucleic Acid reagent set, Roche) | 18 | 2  | 7  | 79     | 23.6   | 72.0 (54.4-89.6)             | 97.5 (94.2-100)               | 90.0 (76.9-100)  | 91.9 (86.1-97.6) | 2.5 (0-5.8)                | 28.0 (10.4-45.6)             |
| Benouda, 2009 <sup>†</sup>                                               | ELISA V3.0 (Murex anti-HCV, Abbott)            | RT-PCR (Amplicor HCV® v2.0, Roche)                       | 62 | 96 | 0  | 100    | 24.0   | 61.0 (8.9-96.2) <sup>‡</sup> | 98.8 (98.5-99.0) <sup>‡</sup> | 39.2 (31.6-46.9) | 100 (100-100)    | 1.2 (1.0-1.5) <sup>‡</sup> | 39.0 (3.8-91.1) <sup>‡</sup> |
| Kosan, 2010                                                              | ELISA v3.0 (Innotest HCV Ab III, Innogenetics) | NAT (Procleix Ultrio kit, Chiron)                        | 9  | 56 | 2  | 17,784 | 0.1    | 81.8 (59.0-100)              | 99.7 (99.6-99.8)              | 13.8 (5.4-22.2)  | 100 (100-100)    | 0.3 (0.2-0.4)              | 18.2 (0-41.0)                |
| <i>Immunoassay that detects both antibodies to HCV and viral antigen</i> |                                                |                                                          |    |    |    |        |        |                              |                               |                  |                  |                            |                              |
| Arora, 2016                                                              | ELISA v4.0 (Monolisa Ag-Ab Ultra, BioRad)      | NAT (Procleix Ultrio kit, Chiron)                        | 37 | 46 | 4  | 21,028 | 0.2    | 90.2 (81.2-99.3)             | 99.8 (99.7-99.8)              | 44.6 (33.9-55.3) | 100 (100-100)    | 0.2 (0.2-0.3)              | 9.8 (0.7-18.8)               |

Abbreviations: Pr: prevalence in the study; TP: true-positives; FN: false-negatives; FP: false-positives; TN: true-negatives; Sn: sensitivity; Sp: specificity; PPV: positive predictive value; NPV: negative predictive value; FP rate: false-positive rate; FN rate: false-negative rate. ELISA: enzyme-linked immunosorbent assay; CLIA: chemiluminescent immunoassay; ECLIA: electrochemiluminescent immunoassay; CMIA: chemiluminescent microparticle immunoassay; MEIA: microparticle enzyme immunoassay; LIA: line immunoassay; RIBA: recombinant immunoblot assay; NAT: nucleic acid amplification test; PCR: polymerase chain reaction; RT-PCR: reverse-transcription polymerase chain reaction.

<sup>†</sup>The Benouda 2009 article does not report on the comparison of ELISA v3.0 to PCR; these data were obtained through personal communication with the authors.(20)

<sup>‡</sup>Adjusted for verification bias.(44)

Table 5. Assessment of the quality of the 'body of evidence' using GRADE

| Outcome                                                                                 | No of studies<br>(No of patients)       | Study design                                    | Factors that may decrease quality of evidence |                           |                      |                           |                  | Expected number per 1000 patients tested   |                                            |                                            | Test accuracy QoE |
|-----------------------------------------------------------------------------------------|-----------------------------------------|-------------------------------------------------|-----------------------------------------------|---------------------------|----------------------|---------------------------|------------------|--------------------------------------------|--------------------------------------------|--------------------------------------------|-------------------|
|                                                                                         |                                         |                                                 | Risk of bias                                  | Indirectness              | Inconsistency        | Imprecision               | Publication bias | pre-test probability <sup>1</sup> of 0.96% | pre-test probability <sup>1</sup> of 0.61% | pre-test probability <sup>1</sup> of 1.34% |                   |
| <b>True positives</b><br>(patients with HCV infection)                                  | 1 study<br>11 patients <sup>2</sup>     | cross-sectional<br>(cohort type accuracy study) | not serious <sup>3</sup>                      | very serious <sup>4</sup> | serious <sup>5</sup> | very serious <sup>6</sup> | none             | 8 (6 to 10)                                | 5 (4 to 6)                                 | 11 (8 to 13)                               | ⊕○○○<br>VERY LOW  |
| <b>False negatives</b><br>(patients incorrectly classified as not having HCV infection) |                                         |                                                 |                                               |                           |                      |                           |                  | 2 (0 to 4)                                 | 1 (0 to 2)                                 | 2 (0 to 5)                                 | -                 |
| <b>True negatives</b><br>(patients without HCV infection)                               | 1 study<br>17.840 patients <sup>2</sup> | cross-sectional<br>(cohort type accuracy study) | not serious <sup>3</sup>                      | very serious <sup>4</sup> | serious <sup>5</sup> | not serious <sup>7</sup>  | none             | 987 (986 to 988)                           | 991 (990 to 992)                           | 984 (983 to 985)                           | ⊕○○○<br>VERY LOW  |
| <b>False positives</b><br>(patients incorrectly classified as having HCV infection)     |                                         |                                                 |                                               |                           |                      |                           |                  | 3 (2 to 4)                                 | 3 (2 to 4)                                 | 3 (2 to 4)                                 | -                 |

<sup>1</sup> The pre-test probabilities correspond to the HCV seroprevalence estimate in the general Canadian population of 0.96, 95% CI (0.61-1.34) (2)

<sup>2</sup> Kosan *et al.*, 2010

<sup>3</sup> These outcomes were not downgraded for risk of bias; based on the QUADAS-2, the risk of bias was assessed to be low (Appendix D).

<sup>4</sup> These outcomes were downgraded by 2 points for indirectness, because 1) the study population is different from our research question (Turkish volunteers who underwent a mandatory physical examination prior to blood donation versus the general Canadian population), and 2) this study answers an indirect question about diagnostic testing accuracy rather than directly assessing the effectiveness of screening the general population for HCV infection.

<sup>5</sup> These outcomes were downgraded by 1 point for inconsistency, because we expect that other studies may have different estimates.

<sup>6</sup> The outcomes were downgraded by 1 point for imprecision, because the very low number of true-positives and false-negatives led to a very wide 95% confidence interval for the sensitivity estimate.

<sup>7</sup> These outcomes were not downgraded for imprecision, because the large number of true negatives led to a very narrow 95% confidence interval for the specificity estimate.

Figure 1. PRISMA flow diagram of study selection

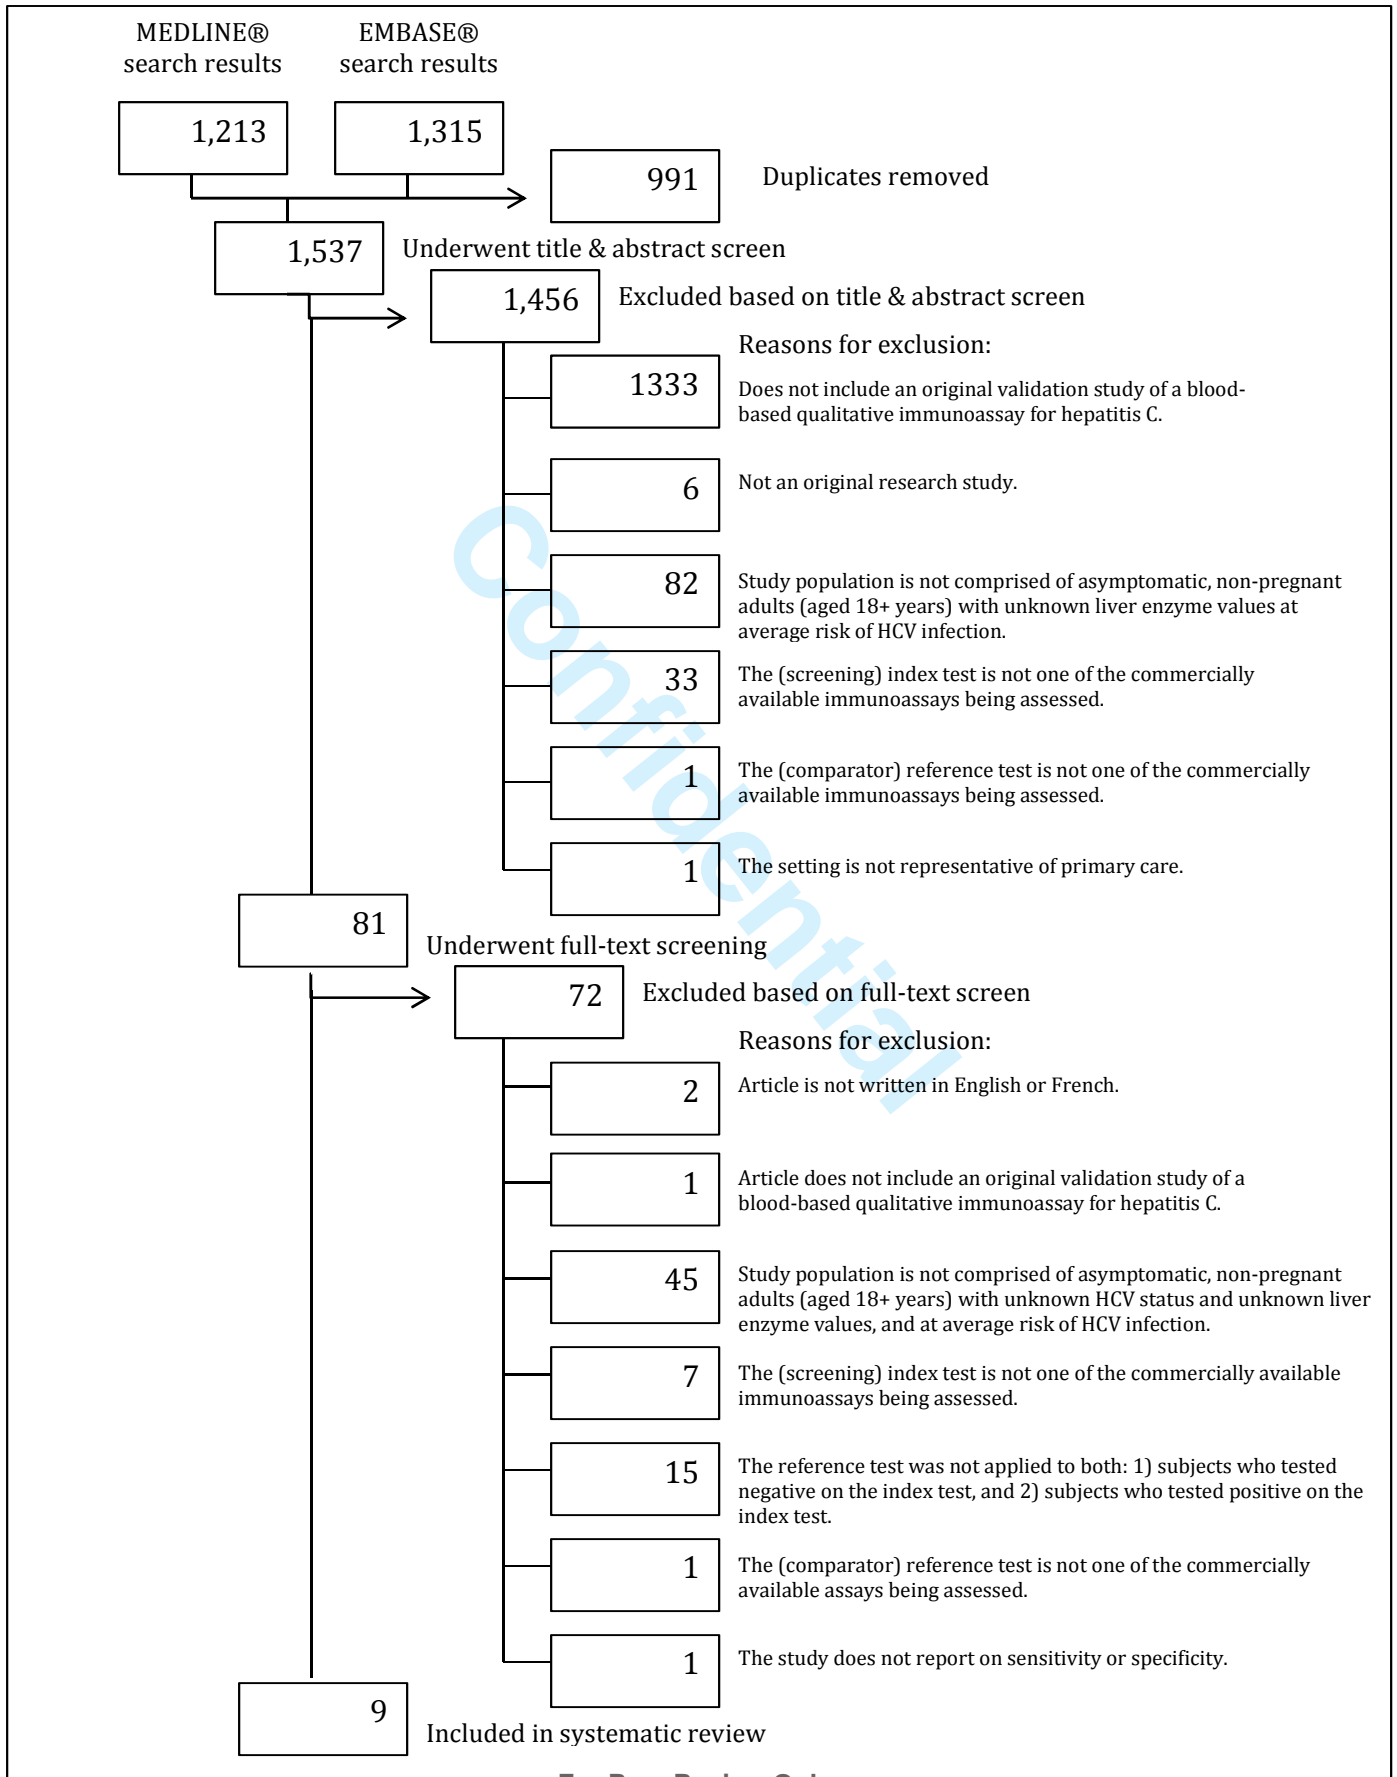

## Appendix A: Hepatitis C testing at provincial/territorial labs: environmental scan

### OBJECTIVE

The objective of this environmental scan was to obtain information about the tests and testing sequences used to diagnose HCV infection in Canada.

### METHODS

Given that provincial and territorial (P/T) laboratories would be expected to perform a majority of HCV testing (and nearly all HCV genotyping), I focused on HCV testing performed by the P/T laboratories. I first performed a grey literature search of all P/T laboratory websites, as well as websites from reputable HCV-related non-profit organization such as CATIE.

Next, to supplement the grey literature search, I contacted each P/T laboratory by email and/or telephone and asked to speak to the person most directly responsible for HCV testing. I asked the following 6 questions for each P/T laboratory:

*The Canadian Task Force on Preventive Health Care (CTFPHC) is currently working on a guideline re: screening for hepatitis C in primary care. To help with this process, we would like more information about how each of the provincial labs conducts testing for hepatitis C.*

*Could you please provide us with the following information:*

- 1) What is the initial test for hepatitis C used by your laboratory (e.g., ELISA)?*
- 2) What is the confirmatory test for hepatitis C used by your laboratory (e.g., PCR)?*
- 3) Are other tests done routinely (other than viral load)?*
- 4) Is the confirmatory test applied to all specimens that are positive on the initial test automatically?*
- 5) Is additional specimen collection required in order to apply the confirmatory test?*
- 6) When is the ordering physician notified of the test result (i.e., after the initial test, or only after the confirmatory test)?*

For ambiguous answers, I obtained clarification by email or telephone as needed. Data collection for this environmental scan took place from February 25 to March 2, 2016.

### RESULTS

The grey literature search identified useful but potentially outdated information about each province's HCV testing on the CATIE website (<http://www.catie.ca/en/practical-guides/hepc-in-depth/testing/testing-your-region>). A search of individual P/T laboratory websites similarly identified some useful but potentially outdated information (Table 1). Information identified through the grey literature search was verified and supplemented by surveying each P/T laboratory (Table 1).

**Initial screening test**

9 provinces and 1 territory performed the initial screening test for HCV locally; 3 referred it to other P/T labs (NU, PE, YT). For the initial HCV screening test, 6/10 laboratories used a CMIA (AB, MB, NB, NL, NS, ON), 3/10 used a CLIA (BC, NT, SK), and 1/10 used an MEIA (QC).

**Confirmatory testing**

9 provinces performed confirmatory testing for HCV locally; 4 referred it to other P/T laboratories (NT, NU, PE, YT). For the confirmatory HCV test, 6/9 laboratories used an immunoassay (AB, BC, MB, ON, QC, SK), and 3/9 used PCR (NB, NL, NS).

**Testing sequence**

In all P/T laboratories, the confirmatory test is usually performed on the same blood specimen as the initial test, provided that the specimen is sufficient; the patient is not typically required to provide an additional blood specimen for the confirmatory test to be applied. Some laboratories release the results of the initial test to the ordering physician immediately, whereas others wait until the confirmatory test result is available.

**DISCUSSION**

This rapid environmental scan revealed that a large majority of P/T laboratories use immunoassays for both their initial screening test and their confirmatory test for HCV. The initial screening tests for HCV included CMIA, CLIA, and MEIA; ELISA was not used by any P/T laboratory as an initial screening test. Only a small minority of P/T laboratories use PCR as their confirmatory test for HCV.

A limitation of this study is that not all testing for HCV is done by the P/T laboratories; this study did not ascertain the tests used by non-P/T (typically, commercial) laboratories. This study does not account for the use of 'rapid tests' (based on finger prick blood) that may be conducted in some healthcare settings; however, in Canada, 'rapid tests' would typically be used to reach high-risk and/or vulnerable populations, and not the general population targeted by the CTFPHC clinical practice guideline.

Confidential

1  
2  
3  
4  
5  
6  
7  
8  
9  
10  
11  
12  
13  
14  
15  
16  
17  
18  
19  
20  
21  
22  
23  
24  
25  
26  
27  
28  
29  
30  
31  
32  
33  
34  
35  
36  
37  
38  
39  
40  
41  
42  
43  
44  
45  
46  
47  
48  
49

1  
2  
3  
4  
5  
6  
7  
8  
9  
10  
11  
12  
13  
14  
15  
16  
17  
18  
19  
20  
21  
22  
23  
24  
25  
26  
27  
28  
29  
30  
31  
32  
33  
34  
35  
36  
37  
38  
39  
40  
41  
42  
43  
44  
45  
46  
47  
48  
49

Table 1. Hepatitis C testing by provincial labs: results from the environmental scan

| Province/territory           | First test              | Second test                                 | Third test                                                                                                                                                                                                                                   | Notification of ordering physician                                                                               | Testing site (laboratory)                                                                     | Information source                                                                                                                                                                                                                                                                         |
|------------------------------|-------------------------|---------------------------------------------|----------------------------------------------------------------------------------------------------------------------------------------------------------------------------------------------------------------------------------------------|------------------------------------------------------------------------------------------------------------------|-----------------------------------------------------------------------------------------------|--------------------------------------------------------------------------------------------------------------------------------------------------------------------------------------------------------------------------------------------------------------------------------------------|
| <b>Alberta (AB)</b>          | Architect Anti-HCV CMIA | BioRad Monolisa HCV Ag-Ab ULTRA Assay (EIA) | We do not currently have a reflex to viral load testing, although for first time positives and for indeterminate results (i.e. when 1/2 EIAs are positive), we recommend to the physician that they send in a sample for viral load testing. | The result is reported after the confirmatory EIA is completed.                                                  | Most Hep C tests in Alberta are sent to the Provincial Laboratory of Public Health (ProvLab). | Carmen L Charlton<br>Clinical Microbiologist<br>Provincial Laboratory of Public Health (ProvLab)<br>(responded by email on 2016-02-25)                                                                                                                                                     |
| <b>British Columbia (BC)</b> | Advia Centaur HCV CLIA  | Architect Anti-HCV CMIA                     | For all seropositive or equivocal samples we automatically request a new sample to be drawn in an EDTA blood for HCV RNA testing.                                                                                                            | After the confirmatory (second) test, which is done automatically if the initial test is positives or equivocal. | Most Hep C tests in British Columbia are sent to the BC Centre for Disease Control (BCCDC).   | Mel Kraiden<br>BC Public Health<br>Microbiology & Reference Laboratory (responded by email on 2016-02-28)                                                                                                                                                                                  |
| <b>Manitoba (MB)</b>         | Architect Anti-HCV CMIA | Chiron RIBA HCV test 3.0                    | COBAS AmpliPrep/COBAS AMPLICOR HCV test                                                                                                                                                                                                      |                                                                                                                  | Most Hep C tests in Manitoba are sent to the Cadham Provincial Lab.                           | CATIE, 2010.<br><a href="http://www.catie.ca/en/practical-guides/hepc-in-depth/testing/testing-your-region/manitoba">http://www.catie.ca/en/practical-guides/hepc-in-depth/testing/testing-your-region/manitoba</a><br><br>No response was obtained from the Cadham Provincial Laboratory. |



| Province/territory                      | First test              | Second test                                                                                       | Third test                                 | Notification of ordering physician                                                           | Testing site (laboratory)                                                                                                                                                                                                             | Information source                                                                                                                                                                                                                                                                                                                                                                                                                                                |
|-----------------------------------------|-------------------------|---------------------------------------------------------------------------------------------------|--------------------------------------------|----------------------------------------------------------------------------------------------|---------------------------------------------------------------------------------------------------------------------------------------------------------------------------------------------------------------------------------------|-------------------------------------------------------------------------------------------------------------------------------------------------------------------------------------------------------------------------------------------------------------------------------------------------------------------------------------------------------------------------------------------------------------------------------------------------------------------|
| <b>New Brunswick (NB)</b>               | Architect Anti-HCV CMIA | COBAS AmpliPrep/COBAS AMPLICOR HCV test                                                           | INNO-LIA HCV Score v2                      | Depends on the hospital policy. All tests are run automatically if the sample is sufficient. | <i>“Les tests de dépistage sont faits dans les 7 hôpitaux régionaux du NB. Nous utilisons tous le même test de dépistage. Les tests supplémentaires référés à mon laboratoire, qui sert de laboratoire provincial en la matière.”</i> | Richard Garceau Microbiology Laboratory at George Dumont Hospital (responded by email 2016-02-29)                                                                                                                                                                                                                                                                                                                                                                 |
| <b>Newfoundland &amp; Labrador (NL)</b> | Architect Anti-HCV CMIA | Roche Diagnostics. Cobas Amplicor (PCR); if reactive anti-HCV (auto-reflex testing by laboratory) | If PCR is negative, then INNO-LIA HCV test |                                                                                              | All Hep C tests in the province are sent to the Public Health Laboratory in St. John's.                                                                                                                                               | Newfoundland and Labrador Public Health Laboratory<br><br>Testing algorithm on lab website (2012):<br><a href="http://publichealthlab.ca/wp-content/uploads/2012/10/Hepatitis-Algorithm.pdf">http://publichealthlab.ca/wp-content/uploads/2012/10/Hepatitis-Algorithm.pdf</a><br>and<br><a href="http://publichealthlab.ca/service/anti-hcv-anti-hepatitis-c-virus-antibodies/">http://publichealthlab.ca/service/anti-hcv-anti-hepatitis-c-virus-antibodies/</a> |
| <b>Northwest Territories (NT)</b>       | VITROS Anti-HCV CLIA    | See AB                                                                                            | See AB                                     | See AB                                                                                       | Hep C antibody tests from Yellowknife HSS area are sent to the Stanton Territorial Hospital in Yellowknife. All other Health authorities in the Northwest Territories send their Hep C antibody tests directly to Alberta.            | CATIE, 2010.<br><a href="http://www.catie.ca/en/practical-guides/hepc-in-depth/testing/testing-your-region/northwest-territories">http://www.catie.ca/en/practical-guides/hepc-in-depth/testing/testing-your-region/northwest-territories</a>                                                                                                                                                                                                                     |

1  
2  
3  
4  
5  
6  
7  
8  
9  
10  
11  
12  
13  
14  
15  
16  
17  
18  
19  
20  
21  
22  
23  
24  
25  
26  
27  
28  
29  
30  
31  
32  
33  
34  
35  
36  
37  
38  
39  
40  
41  
42  
43  
44  
45  
46  
47  
48  
49

| Province/territory               | First test              | Second test                                                                              | Third test                                                                                                                                                                                                                    | Notification of ordering physician                                                                  | Testing site (laboratory)                                                                                                            | Information source                                                                                                                                                                                                                       |
|----------------------------------|-------------------------|------------------------------------------------------------------------------------------|-------------------------------------------------------------------------------------------------------------------------------------------------------------------------------------------------------------------------------|-----------------------------------------------------------------------------------------------------|--------------------------------------------------------------------------------------------------------------------------------------|------------------------------------------------------------------------------------------------------------------------------------------------------------------------------------------------------------------------------------------|
| <b>Nova Scotia (NS)</b>          | Architect Anti-HCV CMIA | Roche Taqman HCV viral load assay. We do not ask for a second specimen for confirmation. | If the Viral load assay is negative we perform an InnoLia immunoblot assay to see if the positive screen was due to a previous infection that has resolved or a false positive screening result. These are reflexively added. | We release the result as a screening test only and highlight that a confirmatory test is to follow. | Most Hep C tests in Nova Scotia are sent to the Queen Elizabeth II Health Sciences Centre in Halifax.                                | Dr Todd F. Hatchette Chief, Division of Microbiology Department of Pathology and Laboratory Medicine Nova Scotia Health Authority (responded by email on 2016-02-25)                                                                     |
| <b>Nunavut (NU)</b>              | See AB                  | See AB                                                                                   | See AB                                                                                                                                                                                                                        | See AB                                                                                              | Most Hep C tests in Nunavut are sent to the Provincial Laboratory of Public Health (ProvLab) in Alberta                              | CATIE, 2010. <a href="http://www.catie.ca/en/practical-guides/hepc-in-depth/testing/testing-your-region/nunavut">http://www.catie.ca/en/practical-guides/hepc-in-depth/testing/testing-your-region/nunavut</a>                           |
| <b>Ontario (ON)</b>              | Architect Anti-HCV CMIA | Advia Centaur HCV CLIA                                                                   | For reactive (positive) or inconclusive anti-HCV results, submission of a 2.5 mL frozen serum or frozen plasma is recommended for HCV RNA viral load (Roche Assay) +/- HCV genotyping (Abbott Assay)                          | CMIA and CLIA results are reported together, turnaround time is up to 5 days                        | Most Hep C tests in Ontario are sent to the Public Health Ontario Laboratory (PHOL).                                                 | Public Health Ontario Laboratory (PHOL) Jocelyn Maregmen Supplemental Virology (responded by email on 2016-02-25)                                                                                                                        |
| <b>Prince Edward Island (PE)</b> | See NS                  | See NS                                                                                   | See NS                                                                                                                                                                                                                        | See NS                                                                                              | All Hep C tests in Prince Edward Island are sent to the lab at the Queen Elizabeth II Health Sciences Centre in Halifax, Nova Scotia | CATIE, 2010. <a href="http://www.catie.ca/en/practical-guides/hepc-in-depth/testing/testing-your-region/prince-edward-island">http://www.catie.ca/en/practical-guides/hepc-in-depth/testing/testing-your-region/prince-edward-island</a> |

| Province/<br>territory       | First test                      | Second test                 | Third test                                                                              | Notification of<br>ordering physician | Testing site<br>(laboratory)                                                                                    | Information source                                                                                                                                                                                                                                                                                                  |
|------------------------------|---------------------------------|-----------------------------|-----------------------------------------------------------------------------------------|---------------------------------------|-----------------------------------------------------------------------------------------------------------------|---------------------------------------------------------------------------------------------------------------------------------------------------------------------------------------------------------------------------------------------------------------------------------------------------------------------|
| <b>Quebec (QC)</b>           | AxSym Anti-HCV<br>MEIA          | Chiron RIBA HCV test<br>3.0 | COBAS<br>AmpliPrep/COBAS<br>AMPLICOR HCV test<br>(PCR)                                  |                                       | Most Hep C tests in<br>Québec are sent to Le<br>Laboratoire de Santé<br>Publique du Quebec<br>(LSPQ).           | CATIE, 2010.<br><a href="http://www.catie.ca/en/practical-guides/hepc-in-depth/testing/testing-your-region/quebec">http://www.catie.ca/en/practical-guides/hepc-in-depth/testing/testing-your-region/quebec</a><br><br>No response was<br>obtained from the<br>Laboratoire de sante<br>publique du Québec<br>(LSPQ) |
| <b>Saskatchewan<br/>(SK)</b> | Advia Centaur anti-<br>HCV CLIA | Architect HCV-Ag CMIA       | if the Architect HCV-Ag<br>CMIA is negative then a<br>INNO-LIA HCV Score test<br>is run | Only after the<br>confirmatory test   | Most Hep C tests in the<br>province are sent to the<br>Saskatchewan Disease<br>Control Laboratory in<br>Regina. | Jim Putz, Saskatchewan<br>Disease Control<br>Laboratory<br>(responded by email<br>2016-02-26)                                                                                                                                                                                                                       |
| <b>Yukon (YT)</b>            | See BC                          | See BC                      | See BC                                                                                  | See BC                                | Most Hep C tests in<br>Yukon are sent to the<br>BCCDC Provincial Lab<br>in British Columbia                     | CATIE, 2010.<br><a href="http://www.catie.ca/en/practical-guides/hepc-in-depth/testing/testing-your-region/yukon">http://www.catie.ca/en/practical-guides/hepc-in-depth/testing/testing-your-region/yukon</a>                                                                                                       |

CLIA: chemiluminescent immunoassay; CMIA: chemiluminescent microparticle immunoassay; MEIA: microparticle enzyme immunoassay; ELISA : enzyme-linked immunosorbent assay; RIBA : recombinant immunoblot assay; PCR: polymerase chain reaction

1  
2  
3  
4  
5  
6  
7  
8  
9  
10  
11  
12  
13  
14  
15  
16  
17  
18  
19  
20  
21  
22  
23  
24  
25  
26  
27  
28  
29  
30  
31  
32  
33  
34  
35  
36  
37  
38  
39  
40  
41  
42  
43  
44  
45  
46  
47  
48  
49  
50  
51  
52  
53  
54  
55  
56  
57  
58  
59  
60**Appendix B: literature search strategies**

**Search strategy for Ovid MEDLINE® 1946-present and Ovid MEDLINE® In-Process & Other Non-Indexed Citations; run on 2016-MAY-06, yielding 1,213 results.**

| #  | Search                                                                                                                                                                 |
|----|------------------------------------------------------------------------------------------------------------------------------------------------------------------------|
| 1  | Hepatitis C/ or Hepatitis C, Chronic/ or Hepacivirus/ or Hepatitis C Antibodies/ or exp Hepatitis C Antigens/                                                          |
| 2  | (hepatitis C or hepC or hep C or hepacivirus or HCV).ti,ab,kf                                                                                                          |
| 3  | 1 or 2                                                                                                                                                                 |
| 4  | exp Enzyme-Linked Immunosorbent Assay/                                                                                                                                 |
| 5  | (ELISA or EIA or enzyme immunoassa* or enzyme linked immunosorben* or enzyme linked immunoassa* or enzyme linked immuno-sorben* or enzyme linked immunoblot*).ti,ab,kf |
| 6  | ((immunosorb* or immuno-sorb*) adj2 enzyme* adj2 (assay or assays)).ti,ab,kf                                                                                           |
| 7  | (CMIA or CLIA or CIA or MEIA).ti,ab,kf                                                                                                                                 |
| 8  | ((chemilumin* or chemi-lumin*) adj2 (immunoassa* or immuno-assa* or assa*)).ti,ab,kf                                                                                   |
| 9  | ((micropart* or micro-part*) adj2 (immunoassa* or immuno-assa* or assa*)).ti,ab,kf                                                                                     |
| 10 | (Architect or Vitros or ADVIA or Centaur or AxSYM or Monolisa or Murex).ti,ab,kf                                                                                       |
| 11 | 4 or 5 or 6 or 7 or 8 or 9 or 10                                                                                                                                       |
| 12 | 3 and 11                                                                                                                                                               |
| 13 | exp Mass Screening/                                                                                                                                                    |
| 14 | (detect* or screen*).ti,ab,kf                                                                                                                                          |
| 15 | 13 or 14                                                                                                                                                               |
| 16 | 12 and 15                                                                                                                                                              |
| 17 | exp "Sensitivity and Specificity"/ or Diagnostic errors/ or exp False Positive Reactions/ or exp "Predictive Value of Tests"/                                          |
| 18 | (false adj2 (positive* or negative*)).ti,ab,kf                                                                                                                         |
| 19 | (predict* adj2 (positive* or negative*)).ti,ab,kf                                                                                                                      |
| 20 | (sensitiv* or specific*).ti,ab,kf                                                                                                                                      |
| 21 | ((test* or diagnos*) adj2 (performance or accura* or characteristic*)).ti,ab,kf                                                                                        |
| 22 | DTA.ti,ab,kf                                                                                                                                                           |
| 23 | 17 or 18 or 19 or 20 or 21 or 22                                                                                                                                       |
| 24 | 3 and 11 and 15 and 23                                                                                                                                                 |
| 25 | 24 not conference abstract.pt                                                                                                                                          |
| 26 | limit 25 to English language                                                                                                                                           |
| 27 | limit 25 to French                                                                                                                                                     |
| 28 | 26 or 27                                                                                                                                                               |
| 29 | limit 28 to yr="1990-current"                                                                                                                                          |
| 30 | remove duplicates from 29                                                                                                                                              |

Search strategy for EMBASE®; run on 2016-MAY-06, yielding 1,315 results.

| #  | Search                                                                                                                                                                       |
|----|------------------------------------------------------------------------------------------------------------------------------------------------------------------------------|
| 1  | exp hepatitis C/ or exp Hepatitis C virus/ or exp hepatitis C antibody/ or exp hepatitis C antigen/                                                                          |
| 2  | (hepatitis C or hepC or hep C or hepacivirus or HCV).ti,ab                                                                                                                   |
| 3  | 1 or 2                                                                                                                                                                       |
| 4  | exp enzyme linked immunosorbent assay/ or exp chemiluminescence immunoassay/ or exp microparticle enzyme immunoassay/                                                        |
| 5  | (ELISA or EIA or enzyme immunoassa* or enzyme linked immunosorben* or enzyme linked immunoassa* or enzyme linked immuno-sorben* or enzyme linked immunoblot*).ti,ab          |
| 6  | ((immunosorb* or immuno-sorb*) adj2 enzyme* adj2 (assay or assays)).ti,ab                                                                                                    |
| 7  | (CMIA or CLIA or CIA or MEIA).ti,ab                                                                                                                                          |
| 8  | ((chemilumin* or chemi-lumin*) adj2 (immunoassa* or immuno-assa* or assa*)).ti,ab                                                                                            |
| 9  | ((micropart* or micro-part*) adj2 (immunoassa* or immuno-assa* or assa*)).ti,ab                                                                                              |
| 10 | (Architect or Vitros or ADVIA or Centaur or AxSYM or Monolisa or Murex).ti,ab                                                                                                |
| 11 | 4 or 5 or 6 or 7 or 8 or 9 or 10                                                                                                                                             |
| 12 | 3 and 11                                                                                                                                                                     |
| 13 | exp antibody screening/ or exp mass screening/ or exp screening/ or exp screening test/                                                                                      |
| 14 | (detect* or screen*).ti,ab                                                                                                                                                   |
| 15 | 13 or 14                                                                                                                                                                     |
| 16 | 12 and 15                                                                                                                                                                    |
| 17 | exp diagnostic accuracy/ or exp "sensitivity and specificity"/ or exp diagnostic error/ or exp false positive result/ or exp false negative result/ or exp predictive value/ |
| 18 | (false adj2 (positive* or negative*)).ti,ab                                                                                                                                  |
| 19 | (predict* adj2 (positive* or negative*)).ti,ab                                                                                                                               |
| 20 | (sensitiv* or specific*).ti,ab                                                                                                                                               |
| 21 | ((test* or diagnos*) adj2 (performance or accura* or characteristic*)).ti,ab                                                                                                 |
| 22 | DTA.ti,ab                                                                                                                                                                    |
| 23 | 17 or 18 or 19 or 20 or 21 or 22                                                                                                                                             |
| 24 | 3 and 11 and 15 and 23                                                                                                                                                       |
| 25 | 24 not conference abstract.pt                                                                                                                                                |
| 26 | limit 25 to English language                                                                                                                                                 |
| 27 | limit 25 to French                                                                                                                                                           |
| 28 | 26 or 27                                                                                                                                                                     |
| 29 | limit 28 to yr="1990-current"                                                                                                                                                |
| 30 | remove duplicates from 29                                                                                                                                                    |

## Appendix C: Excluded articles by level and question

**Level 1: Title and Abstract Screening****1. Is it or does it include an original validation study of a blood-based qualitative immunoassay for hepatitis C? (Exclude rapid/point-of-care tests, geno/serotyping tests, tests applied to dried blood or saliva.)**

**A Alberti, G Morsica, L Chemello, D Cavalletto, F Noventa, P Pontisso, A Ruol** (1992//). Hepatitis C viraemia and liver disease in symptom-free individuals with anti-HCV. *Lancet (London, England)*, 340(8821), 697

**A Antico, S Platzgummer, D Bassetti, N Bizzaro, R Tozzoli, D Villalta, Study Group on Autoimmune Diseases of the Italian Society of Laboratory Medicine (SIMeL)** (2010//). Diagnosing systemic lupus erythematosus: new-generation immunoassays for measurement of anti-dsDNA antibodies are an effective alternative to the Farr technique and the Crithidia luciliae immunofluorescence test. *Lupus*, 19(8), 906

**A Assadian, O Assadian, G Holak, T Watkins-Riedel, C Senekowitsch, J Kovarik, G W Haggmuller** (2008//). Hemodialysis access surgery - is there an increased risk of acquiring hepatitis C virus compared to other elective vascular interventions?. *VASA. Zeitschrift für Gefasskrankheiten*, 37(1), 81

**A Behzad-Behbahani, A Mafi-Nejad, S Z Tabei, K B Lankarani, A Torab, A Moaddeb** (2006//). Anti-HBc & HBV-DNA detection in blood donors negative for hepatitis B virus surface antigen in reducing risk of transfusion associated HBV infection. *The Indian journal of medical research*, 123(1), 37

**A Berger, H W Doerr, H F Rabenau, B Weber** (2000//). High frequency of HCV infection in individuals with isolated antibody to hepatitis B core antigen. *Intervirology*, 43(2), 71

**A Berger, W Preiser, H W Doerr** (2001//). The role of viral load determination for the management of human immunodeficiency virus, hepatitis B virus and hepatitis C virus infection. *Journal of clinical virology : the official publication of the Pan American Society for Clinical Virology*, 20(1-2), 23

**A Carroccio, L Giannitrapani, M Soresi, T Not, G Iacono, C Di Rosa, E Panfili, A Notarbartolo, G Montalto** (2001//). Guinea pig transglutaminase immunolinked assay does not predict coeliac disease in patients with chronic liver disease. *Gut*,

49(4), 506

**A Cecille, M J Wendling, O Panabieres, J P Gut** (1999//). [Retrospective study of the value of the RIBA-3 test in 68 patients with discordant serologies with regard to hepatitis C obtained with third generation ELISA tests. Is there still a value in RIBA-3?]. *Pathologie-biologie*, 47(5), 508

**A D Shannon, C Morrissy, S G Mackintosh, H A Westbury** (1993//). Detection of hog cholera virus antigens in experimentally-infected pigs using an antigen-capture ELISA. *Veterinary microbiology*, 34(3), 233

**A Diez, J A Quiroga, M Melero, G Moraleda, I Castillo, J C Porres, V Carreno** (1991//). Detection of antibody to calmodulin in chronic viral hepatitis: lack of correlation with virus replication and hepatocellular damage. *Digestion*, 49(3), 125

**A E Silva, B Hosein, R W Boyle, C T Fang, M Shindo, J G Waggoner, J H Hoofnagle, A M Di Bisceglie** (1994//). Diagnosis of chronic hepatitis C: comparison of immunoassays and the polymerase chain reaction. *The American journal of gastroenterology*, 89(4), 493

**A Goudeau, F Dubois** (2000//). [Diagnosis and biological surveillance of hepatitis C virus infections]. *La Revue du praticien*, 50(10), 1071

**A Granito, L Muratori, P Muratori, G Pappas, M Guidi, F Cassani, U Volta, A Ferri, M Lenzi, F B Bianchi** (2006//). Antibodies to filamentous actin (F-actin) in type 1 autoimmune hepatitis. *Journal of clinical pathology*, 59(3), 280

**A Heim, D Wagner, T Rothamel, U Hartmann, J Flik, W Verhagen** (1999//). Evaluation of serological screening of cadaveric sera for donor selection for cornea transplantation. *Journal of medical virology*, 58(3), 291

**A J Czaja, H F Taswell, J Rakela, C M Schimek** (1991//). Frequency and significance of antibody to hepatitis C virus in severe corticosteroid-treated autoimmune chronic active hepatitis. *Mayo Clinic proceedings*, 66(6), 572

**A J Czaja, H F Taswell, J Rakela, C Schimek** (1992//). Frequency of antibody to hepatitis C virus in asymptomatic HBsAg-negative chronic active hepatitis. *Journal of hepatology*, 14(1), 88

**A J Czaja, S Magrin, C Fabiano, G Fiorentino, O Diquattro, A Craxi, L Pagliaro** (1995//). Hepatitis C virus infection as a determinant of behavior in type 1 autoimmune hepatitis. *Digestive diseases and sciences*, 40(1), 33

- 1  
2  
3  
4  
5  
6  
7  
8  
9  
10  
11  
12  
13  
14  
15  
16  
17  
18  
19  
20  
21  
22  
23  
24  
25  
26  
27  
28  
29  
30  
31  
32  
33  
34  
35  
36  
37  
38  
39  
40  
41  
42  
43  
44  
45  
46  
47  
48  
49  
50  
51  
52  
53  
54  
55  
56  
57  
58  
59  
60
- A J Weiner, H M Geysen, C Christopherson, J E Hall, T J Mason, G Saracco, F Bonino, K Crawford, C D Marion, K A Crawford** (1992//). Evidence for immune selection of hepatitis C virus (HCV) putative envelope glycoprotein variants: potential role in chronic HCV infections. *Proceedings of the National Academy of Sciences of the United States of America*, 89(8), 3468
- A K Panigrahi, S K Panda, R K Dixit, K V Rao, S K Acharya, S Dasarathy, A Nanu** (1997//). Magnitude of hepatitis C virus infection in India: prevalence in healthy blood donors, acute and chronic liver diseases. *Journal of medical virology*, 51(3), 167
- A Khanna, C D Poduri, P Murugan, S Kumar, V S Sugunan, K T Shenoy, M R Das** (1998//). Analysis of human immune response to potential hepatitis C viral epitopes. *Acta virologica*, 42(3), 141
- A Kubota, S Okamura, F Omori, K Shimoda, T Otsuka, H Ishibashi, Y Niho** (1995//). High serum levels of granulocyte-macrophage colony-stimulating factor in patients with liver cirrhosis and granulocytopenia. *Clinical and laboratory haematology*, 17(1), 61
- A M Atta, P Estevam, R Parana, C M Pereira, B C O Leite, M L B Sousa-Atta** (2008//). Antiphospholipid antibodies in Brazilian hepatitis C virus carriers. *Brazilian journal of medical and biological research = Revista brasileira de pesquisas medicas e biologicas / Sociedade Brasileira de Biofisica ... [et al.]*, 41(6), 489
- A M E C Barreto, K Takei, Sabino E C, M A O Bellesa, N A Salles, C C Barreto, A S Nishiya, D F Chamone** (2008//). Cost-effective analysis of different algorithms for the diagnosis of hepatitis C virus infection. *Brazilian journal of medical and biological research = Revista brasileira de pesquisas medicas e biologicas / Sociedade Brasileira de Biofisica ... [et al.]*, 41(2), 126
- A M Prince, J W Scheffel, B Moore** (1997//). A search for hepatitis C virus polymerase chain reaction-positive but seronegative subjects among blood donors with elevated alanine aminotransferase. *Transfusion*, 37(2), 211
- A M Yamamoto, C Johanet, J C Duclos-Vallee, F A Bustarret, F Alvarez, J C Homberg, J F Bach** (1997//). A new approach to cytochrome CYP2D6 antibody detection in autoimmune hepatitis type-2 (AIH-2) and chronic hepatitis C virus (HCV) infection: a sensitive and quantitative radioligand assay. *Clinical and experimental immunology*, 108(3), 396
- A Martini, G Fattovich, M Guido, E Bugianesi, A Biasiolo, D Ieluzzi, A Gallotta, G Fassina, C Merkel, A Gatta, F Negro, P Pontisso** (2015//). HCV genotype 3 and squamous cell carcinoma antigen (SCCA)-IgM are independently associated with histological features of NASH in HCV-infected patients. *Journal of viral hepatitis*, 22(10), 800
- A Monteverde, G Airoidi, M Ballare, G Fortina, V Quaglia, A Pigatto, P Manzini** (1993//). Reliability of immunoassays for anti-HCV antibodies (ELISA and RIBA II) in patients with essential mixed cryoglobulinemia (EMC). *Clinical and experimental rheumatology*, 11(6), 609
- A Nishizono, H Terao, R Shutoh, M Nasu, K Mifune, B J Wun, B Montas, F S Fernandez** (1997//). Genotyping of hepatitis C virus in the Dominican Republic. *The American journal of tropical medicine and hygiene*, 57(6), 719
- A O Shittu, H O Olawumi, J O Adewuyi** (2014//). Pre-donation screening of blood for transfusion transmissible infections: the gains and the pains - experience at a resource limited blood bank. *Ghana medical journal*, 48(3), 158
- A Pekarikova, D Sanchez, L Palova-Jelinkova, M Simsova, Z Benes, I Hoffmanova, P Drastich, I Janatkova, T Mothes, H Tlaskalova-Hogenova, L Tuckova** (2010//). Calreticulin is a B cell molecular target in some gastrointestinal malignancies. *Clinical and experimental immunology*, 160(2), 215
- A Pivert, C Payan, P Morand, S Fafi-Kremer, J Deshayes, F Carrat, S Pol, P Cacoub, C Perronne, F Lunel** (2006//). Comparison of serum hepatitis C virus (HCV) RNA and core antigen levels in patients coinfecting with human immunodeficiency virus and HCV and treated with interferon plus ribavirin. *Journal of clinical microbiology*, 44(2), 417
- A Widell, G Sundstrom, B G Hansson, T Moestrup, E Nordenfelt** (1991//). Antibody to hepatitis-C-virus-related proteins in sera from alanine-aminotransferase-screened blood donors and prospectively studied recipients. *Vox sanguinis*, 60(1), 28
- A Widell, V Molnegren, F Pieksma, M Calmann, J Peterson, S R Lee** (2002//). Detection of hepatitis C core antigen in serum or plasma as a marker of hepatitis C viraemia in the serological window-phase. *Transfusion medicine (Oxford, England)*, 12(2), 107
- A Xiang, F Wei, X Lei, Y Liu, Y Liu, Y Guo** (2013//). A simple and rapid capillary chemiluminescence immunoassay for quantitatively detecting human serum HBsAg. *European journal of clinical microbiology &*



1  
2  
3  
4  
5  
6  
7  
8  
9  
10  
11  
12  
13  
14  
15  
16  
17  
18  
19  
20  
21  
22  
23  
24  
25  
26  
27  
28  
29  
30  
31  
32  
33  
34  
35  
36  
37  
38  
39  
40  
41  
42  
43  
44  
45  
46  
47  
48  
49  
50  
51  
52  
53  
54  
55  
56  
57  
58  
59  
60

*infectious diseases : official publication of the European Society of Clinical Microbiology*, 32(12), 1557

**A Yaari, D Tovbin, M Zlotnick, M Mostoslavsky, Y Shemer-Avni, N Hanuka, Z Burbea, Z Katzir, S Storch, M Margalith** (2006//). Detection of HCV salivary antibodies by a simple and rapid test. *Journal of virological methods*, 133(1), 1

**A Zibert, H Meisel, W Kraas, A Schulz, G Jung, M Roggendorf** (1997//). Early antibody response against hypervariable region 1 is associated with acute self-limiting infections of hepatitis C virus. *Hepatology (Baltimore, Md.)*, 25(5), 1245

**A Zibert, W Kraas, R S Ross, H Meisel, S Lechner, G Jung, M Roggendorf** (1999//). Immunodominant B-cell domains of hepatitis C virus envelope proteins E1 and E2 identified during early and late time points of infection. *Journal of hepatology*, 30(2), 177

**Abdelfattah M Attallah, Faten Zahran, Hisham Ismail, Mohamed M Omran, Ibrahim El-Dosoky, Gamal E Shiha** (2007//). Immunochemical identification and detection of serum fibronectin in liver fibrosis patients with chronic hepatitis C. *Journal of immunoassay & immunochemistry*, 28(4), 331

**Abdelfattah M Attallah, Hisham Ismail, Ashraf A Tabll, Gamal E Shiha, Ibrahim El-Dosoky** (2003//). A novel antigen detection immunoassay for field diagnosis of hepatitis C virus infection. *Journal of immunoassay & immunochemistry*, 24(4), 395

**Abdelfattah M Attallah, Hisham Ismail, Gamal E Shiha, Mohamed I Abou-Dobara, Rania E El-Sherbiny, Ibrahim El-Dosoky** (2008//). Immunochemical identification and partial characterization of a native hepatitis C viral non-structural 4 antigen in sera of HCV infected patients. *Clinica chimica acta; international journal of clinical chemistry*, 388(1-2), 115

**Abdelfattah M Attallah, Mohamed El-Far, Mohamed M Omran, Khaled Farid, Ahmed A Attallah, Dalal Abd-Elaziz, Mohamed S El-Bendary, Ibrahim El-Dosoky, Hisham Ismail** (2016//). Levels of Schistosoma mansoni Circulating Antigen in Chronic Hepatitis C Patients with Different Stages of Liver Fibrosis. *Journal of immunoassay & immunochemistry*, 37(3), 316

**Abdelfattah M Attallah, Mohamed M Omran, Wesam A Nasif, Mohamed F Ghaly, Abd El-Raheem R El-Shanshoury, Mohga S Abdalla, Hayat M Sharada, Khaled Farid, Wageh El-Shony, El-Sayed M Moussa, Ehab B El-Domany,**

**Eman Nour, Ibrahim Eldosoky** (2012//). Diagnostic performances of hepatitis C virus-NS4 antigen in patients with different liver pathologies. *Archives of medical research*, 43(7), 555

**Abdelfattah M Attallah, Sanaa O Abdallah, Amr S El Sayed, Mohamed M Omran, Mahmoud El-Bendary, Khaled Farid, Mohamed Kadry** (2011//). Non-invasive predictive score of fibrosis stages in chronic hepatitis C patients based on epithelial membrane antigen in the blood in combination with routine laboratory markers. *Hepatology research : the official journal of the Japan Society of Hepatology*, 41(11), 1075

**Abdelfattah M Attallah, Tamer E Mosa, Mohamed M Omran, Mostafa M Abo-Zeid, Ibrahim El-Dosoky, Yehia M Shaker** (2007//). Immunodetection of collagen types I, II, III, and IV for differentiation of liver fibrosis stages in patients with chronic HCV. *Journal of immunoassay & immunochemistry*, 28(2), 155

**Adalbert Krawczyk, Christian Hintze, Jessica Ackermann, Birgit Goitowski, Martin Trippler, Nico Gruner, Maria Neumann-Fraune, Jens Verheyen, Melanie Fiedler** (2014//). Clinical performance of the novel DiaSorin LIAISON() XL murex: HBsAg Quant, HCV-Ab, HIV-Ab/Ag assays. *Journal of clinical virology : the official publication of the Pan American Society for Clinical Virology*, 59(1), 44

**Addisalem T Makuria, Sukanya Raghuraman, Peter D Burbelo, Cathy C Cantilena, Robert D Allison, Joan Gibble, Barbara Rehermann, Harvey J Alter** (2012//). The clinical relevance of persistent recombinant immunoblot assay-indeterminate reactions: insights into the natural history of hepatitis C virus infection and implications for donor counseling. *Transfusion*, 52(9), 1940

**Adele Caterino-de-Araujo, Claudio Tavares Sacchi, Maria Gisele Goncalves, Karoline Rodrigues Campos, Mariana Cavalheiro Magri, Wong Kuen Alencar, Group of Surveillance and Diagnosis of HTLV of Sa~o Paulo (GSuDiHTLV-SP)** (2015//). Short Communication: Current Prevalence and Risk Factors Associated with Human T Lymphotropic Virus Type 1 and Human T Lymphotropic Virus Type 2 Infections Among HIV/AIDS Patients in Sao Paulo, Brazil. *AIDS research and human retroviruses*, 31(5), 543

**Adrian Gadano, Omar Galdame, Sebastian Marciano** (2010//). Diagnosis of patients with suspected chronic hepatitis C infection. *Annals of hepatology*, 9 Suppl(#issue#), 34

**Adrienn Biro, Anna Horvath, Lilian Varga,**



**Elemer Nemesanszky, Antal Csepregi, Karoly David, Gyula Tolvaj, Endre Ibranyi, Laszlo Telegdy, Alajos Par, Laszlo Romics, Istvan Karadi, Margit Horanyi, Judit Gervain, Pal Ribiczey, Mihaly Csondes, George Fust** (2003//). Serum anti-cholesterol antibodies in chronic hepatitis-C patients during IFN-alpha-2b treatment. *Immunobiology*, 207(3), 161

**Agnes Perrin, David Duracher, Magali Perret, Philippe Cleuziat, Bernard Mandrand** (2003//). A combined oligonucleotide and protein microarray for the codetection of nucleic acids and antibodies associated with human immunodeficiency virus, hepatitis B virus, and hepatitis C virus infections. *Analytical biochemistry*, 322(2), 148

**Ahmed Abdalla, Abd-Al Gawad Sheesha, Mohammad Shokeir, Osama el-Agrody, Mohammad Ezz el-Regal, Mohammad K Abdel-Khalik, Katherine Freeman, Anna Boneberg, Hassan H A-Kader** (2002//). Serum intercellular adhesion molecule-I in children with chronic liver disease: relationship to disease activity. *Digestive diseases and sciences*, 47(6), 1206

**Akihiro Tamori, Takehiro Hayashi, Mayumi Shinzaki, Sawako Kobayashi, Shuji Iwai, Masaru Enomoto, Hiroyasu Morikawa, Hiroki Sakaguchi, Susumu Shiomi, Shigekazu Takemura, Shoji Kubo, Norifumi Kawada** (2009//). Frequent detection of hepatitis B virus DNA in hepatocellular carcinoma of patients with sustained virologic response for hepatitis C virus. *Journal of medical virology*, 81(6), 1009

**Akira Yoshikawa, Yuhko Gotanda, Masako Itabashi, Kiyoshi Minegishi, Kimihiro Kanemitsu, Kusuya Nishioka, Japanese Red Cross NAT Screening Research Group** (2005//). HBV NAT positive [corrected] blood donors in the early and late stages of HBV infection: analyses of the window period and kinetics of HBV DNA. *Vox sanguinis*, 88(2), 77

**Alessandra Biasiolo, Natascia Tono, Martina Zaninotto, Carlo Merkel, Giorgio Fassina, Mario Plebani, Angelo Gatta, Patrizia Pontisso** (2013//). Specificity of squamous cell carcinoma antigen (SCCA)-IgM detection in patients with HCV infection and rheumatoid factor seropositivity. *Journal of medical virology*, 85(6), 1005

**Alexandra Nieters, Birgit Kallinowski, Paul Brennan, Melanie Ott, Marc Maynadie, Yolanda Benavente, Lenka Foretova, Pier Luigi Cocco, Anthony Staines, Martine Vornanen, Denise Whitby, Paolo Boffetta, Nikolaus Becker, Silvia De Sanjose** (2006//). Hepatitis C and risk of lymphoma: results of the European multicenter

case-control study EPILYMPH. *Gastroenterology*, 131(6), 1879

**Alexsandro S Galdino, Jose C Santos, Marilen Q Souza, Yanna K M Nobrega, Mary-Ann E Xavier, Maria S S Felipe, Sonia M Freitas, Fernando A G Torres** (2016//). A Novel Structurally Stable Multi-epitope Protein for Detection of HCV. *Hepatitis research and treatment*, 2016(#issue#), 6592143

**Ali Acar, Sabri Kemahli, Husnu Altunay, Erdogan Kosan, Oral Oncul, Levent Gorenek, Saban Cavuslu** (2010//). HBV, HCV and HIV seroprevalence among blood donors in Istanbul, Turkey: how effective are the changes in the national blood transfusion policies?. *The Brazilian journal of infectious diseases : an official publication of the Brazilian Society of Infectious Diseases*, 14(1), 41

**Ali Judd, John Parry, Matthew Hickman, Tamara McDonald, Laura Jordan, Kim Lewis, Marcela Contreras, Geoff Dusheiko, Graham Foster, Noel Gill, Katie Kemp, Janice Main, Iain Murray-Lyon, Mark Nelson** (2003//). Evaluation of a modified commercial assay in detecting antibody to hepatitis C virus in oral fluids and dried blood spots. *Journal of medical virology*, 71(1), 49

**Amelie Heinrichs, Martine Antoine, Deborah Steensels, Isabel Montesinos, Marie-Luce Delforge** (2016//). HCV false positive immunoassays in patients with LVAD: A potential trap!. *Journal of clinical virology : the official publication of the Pan American Society for Clinical Virology*, 78(#issue#), 44

**Amira El Tawdy, Laila Rashed** (2012//). Downregulation of TLR-7 receptor in hepatic and non-hepatic patients with lichen planus. *International journal of dermatology*, 51(7), 785

**Amjad Ali, Muhammad Nisar, Muhammad Idrees, Shazia Rafique, Muhammad Iqbal** (2015//). Expression of Hepatitis C Virus Core and E2 antigenic recombinant proteins and their use for development of diagnostic assays. *International journal of infectious diseases : IJID : official publication of the International Society for Infectious Diseases*, 34(#issue#), 84

**Ana M Contreras, Rodolfo J Ochoa-Jimenez, Alfredo Celis, Claudia Mendez, Laura Olivares, Claudia E Rebolledo, Isabel Hernandez-Lugo, Ana I Aguirre-Zavala, Ricardo Jimenez-Mendez, Raymond T Chung** (2010//). High antibody level: an accurate serologic marker of viremia in asymptomatic people with hepatitis C infection. *Transfusion*, 50(6), 1335

**Andrew L Singer, Lauren M Kucirka, Ruth Namuyinga, Colleen Hanrahan, Aruna K Subramanian, Dorry L Segev** (2008//). The high-risk donor: viral infections in solid organ transplantation. *Current opinion in organ transplantation*, 13(4), 400

**Anis Khan, Yasuhito Tanaka, Fuat Kurbanov, Abeer Elkady, Zaigham Abbas, Zahid Azam, Amna Subhan, Sajjad Raza, Sajjad Razza, Saeed Hamid, Wasim Jafri, James Shih, Ningshao Xia, Kazuaki Takahashi, Shunji Mishiro, Masashi Mizokami** (2011//). Investigating an outbreak of acute viral hepatitis caused by hepatitis E virus variants in Karachi, South Pakistan. *Journal of medical virology*, 83(4), 622

**Anita Chakravarti, Mayank S Chauhan, Gaurav Dogra, Sayantan Banerjee** (2013//). Hepatitis C virus core antigen assay: can we think beyond convention in resource limited settings?. *The Brazilian journal of infectious diseases : an official publication of the Brazilian Society of Infectious Diseases*, 17(3), 369

**Antoni Xavier Torres-Collado, Albert J Czaja, Carmen Gelpi** (2005//). Anti-tRNP(ser)sec/SLA/LP autoantibodies. Comparative study using in-house ELISA with a recombinant 48.8 kDa protein, immunoblot, and analysis of immunoprecipitated RNAs. *Liver international : official journal of the International Association for the Study of the Liver*, 25(2), 410

**Aseem K Tiwari, Prashant K Pandey, Avinash Negi, Ruchika Bagga, Ajay Shanker, Usha Baveja, Raina Vimarsh, Richa Bhargava, Ravi C Dara, Ganesh Rawat** (2015//). Establishing a sample-to-cut-off ratio for lab-diagnosis of hepatitis C virus in Indian context. *Asian journal of transfusion science*, 9(2), 185

**Aseem K Tiwari, Prashant K Pandey, Ravi C Dara, Ganesh S Rawat, Vimarsh Raina, Richa Bhargava** (2015//). Evaluation of a new serological test for syphilis based on chemiluminescence assay in a tertiary care hospital. *Asian journal of transfusion science*, 9(1), 65

**Ashish Chandra Shrestha, Prakash Ghimire, Bishnu Raj Tiwari, Manita Rajkarnikar** (2009//). Transfusion-transmissible infections among blood donors in Kathmandu, Nepal. *Journal of infection in developing countries*, 3(10), 794

**Ashraf A Tabll, Samy B Khalil, Reem M El-Shenawy, Gamal Esmat, Amr Helmy, Abdel Fattah Attallah, Mostafa K El-Awady** (2008//). Establishment of hybrid cell lines producing monoclonal antibodies to a synthetic peptide from

the E1 region of the hepatitis C virus. *Journal of immunoassay & immunochemistry*, 29(1), 91

**Axel zur Hausen, Josine van Beek, Elisabeth Bloemena, Fiebo J ten Kate, Chris J L M Meijer, Adriaan J C van den Brule** (2003//). No role for Epstein-Barr virus in Dutch hepatocellular carcinoma: a study at the DNA, RNA and protein levels. *The Journal of general virology*, 84(Pt 7), 1863

**Aya Mostafa, Sylvia M Taylor, Mai el-Daly, Mostafa el-Hoseiny, Iman Bakr, Naglaa Arafa, Valerie Thiers, Francois Rimlinger, Mohamed Abdel-Hamid, Arnaud Fontanet, Mostafa K Mohamed** (2010//). Is the hepatitis C virus epidemic over in Egypt? Incidence and risk factors of new hepatitis C virus infections. *Liver international : official journal of the International Association for the Study of the Liver*, 30(4), 560

**Aamado L., Villar L.M., Paula V.S., Almeida A.J., Gaspar A.M.C.** (2006//). Detection of hepatitis A, B, and C virus-specific antibodies using oral fluid for epidemiological studies *Memorias do Instituto Oswaldo Cruz*, 101(2), 149

**Abdallah N., Abdel Aziz H.K., Hamed N.A., Gamal M.** (2010//). Correlation between serum levels of interleukins 10 and 12 and thrombocytopenia in hepatitis c cirrhotic (class A) patients *Journal of Venomous Animals and Toxins Including Tropical Diseases*, 16(3), 456

**Abdel Hady S.I., El-Din M.S., El-Din M.E.** (1998//). A high hepatitis E virus (HEV) seroprevalence among unpaid blood donors and haemodialysis patients in Egypt *The Journal of the Egyptian Public Health Association*, 73(3-4), 165

**Abdel-Latif M.S.** (2015//). Plasma levels of matrix metalloproteinase (MMP)-2, MMP-9 and tumor necrosis factor-alpha in chronic hepatitis C virus patients *Open Microbiology Journal*, 9(#issue#), 136

**Abdel-Razik A., Mousa N., Elbaz S., Eissa M., Elhelaly R., Eldars W.** (2015//). Diagnostic utility of interferon gamma-induced protein 10 kDa in spontaneous bacterial peritonitis: Single-center study *European Journal of Gastroenterology and Hepatology*, 27(9), 1087

**Abdelkader N.A., Abdelmoniem S.S., Sabry D., Abdelbaky A.M., Mahdy M.M., Zaky E., Saad W.E.** (2014//). Vitamin D and IL28B genotyping as predictors for antiviral therapy: A retrospective study in Egyptian HCV genotype 4a *Tropical Journal of Pharmaceutical Research*, 13(10), 1725

**Abo Elmagd E.K., Abdel-Wahab K.S., Alrasheedy**

- 1  
2  
3  
4  
5  
6  
7  
8  
9  
10  
11  
12  
13  
14  
15  
16  
17  
18  
19  
20  
21  
22  
23  
24  
25  
26  
27  
28  
29  
30  
31  
32  
33  
34  
35  
36  
37  
38  
39  
40  
41  
42  
43  
44  
45  
46  
47  
48  
49  
50  
51  
52  
53  
54  
55  
56  
57  
58  
59  
60
- Z.E.,Khalifa A.S.** (2011//). An Egyptian study of mother to child transmission of hepatitis C virus *International Journal of Virology*, 7(3), 100
- Acquaye J.K.,Tetty-Donkor D.** (2000//). Frequency of hepatitis C virus antibodies and elevated serum alanine transaminase levels in Ghanaian blood donors *West African journal of medicine*, 19(4), 239
- Afonso A.M.R.,Didier J.,Plouvier E.,Falissard B.,Ferey M.P.,Bogard M.,Dussaix E.** (2000//). Performance of an automated system for quantification of hepatitis C virus RNA *Journal of Virological Methods*, 86(1), 55
- Ahmed M.A.-H.,Ellakwa D.E.-S.,Omar N.N.** (2014//). Role of serum osteopontin level as a diagnostic biomarker for early hepatocellular carcinoma *International Journal of Cancer Research*, 10(1), 37
- Ahn J.,Cohen S.M.** (2008//). Transmission of human immunodeficiency virus and hepatitis C virus through liver transplantation *Liver Transplantation*, 14(11), 1603
- Ajorloo M.,Bamdad T.,Hashempour T.,Alborzi A.M.,Mozhgani S.H.,Asadi R.,Haj-sheykholeslami A.,Merat S.** (2015//). Detection of Specific Antibodies to HCV-ARF/CORE+1 Protein in Cirrhotic and Non-Cirrhotic Patients with Hepatitis C: A Possible Association with Progressive Fibrosis *Archives of Iranian medicine*, 18(5), 304
- Alatrakchi N.,Graham C.S.,Van Der Vliet H.J.J.,Sherman K.E.,Exley M.A.,Koziel M.J.** (2007//). Hepatitis C virus (HCV)-specific CD8+ cells produce transforming growth factor beta that can suppress HCV-specific T-cell responses *Journal of Virology*, 81(11), 5882
- Albertoni G.,Arnoni C.P.,Araujo P.R.B.,Carvalho F.O.,Barreto J.A.** (2010//). Signal to cutoff (S/CO) ratio and detection of HCV genotype 1 by realtime PCR one-step method: Is there any direct relationship? *Brazilian Journal of Infectious Diseases*, 14(2), 147
- Ali O.S.,Abo-Shadi M.A.,Hammad L.N.** (2005//). The biological significance of serum complements C3 and C4 in HCV-related chronic liver diseases and hepatocellular carcinoma *The Egyptian journal of immunology / Egyptian Association of Immunologists*, 12(2), 91
- Ali S.,Van Pelt J.F.,Verslype C.,Nevens F.,Feverly J.,Yap S.H.** (2004//). TT virus infection in acute and chronic liver diseases and in patients regularly receiving blood products in Belgium *Acta Gastro-Enterologica Belgica*, 67(2), 161
- Allain J.-P.** (2005//). Hepatitis C virus in blood donation *Lancet*, 365(9456), 276
- Alvarez-Lajonchere L.,Guerra I.,Amador-Canizares Y.,Frias R.,Vazquez-Blomquist D.,Morales J.,Duenas-Carrera S.** (2007//). Generation and characterization of recombinant vaccinia viruses expressing a hepatitis C virus Core protein, genotype 1b, individually or as a polyprotein *Biotechnologia Aplicada*, 24(3-4), 246
- Anonymous.** (2002//). NIH Consensus Statement on Management of Hepatitis C: 2002 *NIH consensus and state-of-the-science statements*, 19(3), 1
- Anonymous.** (1993//). False-positive serologic tests for human T-cell lymphotropic virus type I among blood donors following influenza vaccination, 1992 *MMWR. Morbidity and mortality weekly report*, 42(9), 173
- Anonymous.** (1992//). Immunogenic polypeptides with epitopes specific for hepatitis C virus *Current Opinion in Therapeutic Patents*, 2(11), 1865
- Ansari M.A.,Irshad M.,Agarwal S.K.,Chosdol K.** (2013//). Expression of the full-length HCV core subgenome from HCV genotype-1a and genotype-3a and evaluation of the antigenicity of translational products *European Journal of Gastroenterology and Hepatology*, 25(7), 806
- Arapinis C.,Kostaridou S.,Kattamis C.** (1997//). Effective detection of active HCV infection: HCV RNA carrier state in a context free of hepatitis symptoms *Clinica Chimica Acta*, 258(1), 91
- Arora M.M.,Bhatia J.K.** (2007//). Aggressive use of diagnostic services is counterproductive *Medical Journal Armed Forces India*, 63(3), 253
- Attallah A.M.,El-Din N.K.,Omran M.M.,Farid K.,El-Wahab A.H.,El-Bendary M.,El-Dosoky I.** (2011//). Assessment of matrix metalloproteinase-1 for marking liver cirrhosis in chronic hepatitis C patients *The Egyptian journal of immunology / Egyptian Association of Immunologists*, 18(1), 33
- Attallah A.M.,Shiha G.E.,Abdel Malak C.A.,Hagras H.E.,Abdel-Razik W.S.,Ismail H.** (2004//). Utility of a novel HCV-NS4 antigen detection immunoassay for monitoring treatment of HCV-infected individuals with pegylated interferon alpha-2a *Hepatology Research*, 28(2), 68
- B C Dow, H Munro, I Buchanan, E A Follett, F Davidson, P L Yap, P Simmonds** (1996//). Third-generation recombinant immunoblot assay: comparison of reactivities according to hepatitis C virus genotype. *Transfusion*, 36(6), 547

**B Erer, E Angelucci, G Lucarelli, C Giardini, D Baronciani, M Galimberti, P Polchi, G Amadei, L Battistini, S Paolucci** (1994//). Hepatitis C virus infection in thalassemia patients undergoing allogeneic bone marrow transplantation. *Bone marrow transplantation*, 14(3), 369

**B Hosein, C T Fang, M A Popovsky, J Ye, M Zhang, C Y Wang** (1991//). Improved serodiagnosis of hepatitis C virus infection with synthetic peptide antigen from capsid protein. *Proceedings of the National Academy of Sciences of the United States of America*, 88(9), 3647

**B J Pereira, E L Milford, R L Kirkman, S Quan, K R Sayre, P J Johnson, J C Wilber, A S Levey** (1992//). Prevalence of hepatitis C virus RNA in organ donors positive for hepatitis C antibody and in the recipients of their organs. *The New England journal of medicine*, 327(13), 910

**B L C Marques, C U Brandao, E F Silva, V A Marques, C A Villela-Nogueira, K M R Do O, M T de Paula, L L Lewis-Ximenez, E Lampe, L M Villar** (2012//). Dried blood spot samples: optimization of commercial EIAs for hepatitis C antibody detection and stability under different storage conditions. *Journal of medical virology*, 84(10), 1600

**B Luettig, K H Boeker, W Schoessler, H Will, S Loges, E Schmidt, H J Worman, M E Gershwin, M P Manns** (1998//). The antinuclear autoantibodies Sp100 and gp210 persist after orthotopic liver transplantation in patients with primary biliary cirrhosis. *Journal of hepatology*, 28(5), 824

**B M McFarlane, C B Bridger, H M Smith, K A Antonov, N Naoumov, R Williams, I G McFarlane** (1995//). Autoimmune mechanisms in chronic hepatitis B and delta virus infections. *European journal of gastroenterology & hepatology*, 7(7), 615

**B M McFarlane, C Bridger, C J Tibbs, M G Saleh, A Fuzio, G Verucchi, L Attard, A Boschi, F Chiodo, I G McFarlane** (1994//). Virus-induced autoimmunity in hepatitis C virus infections: a rare event. *Journal of medical virology*, 42(1), 66

**B Nalpas, V Thiers, S Pol, F Driss, V Thepot, P Berthelot, C Brechot** (1992//). Hepatitis C viremia and anti-HCV antibodies in alcoholics. *Journal of hepatology*, 14(2-3), 381

**B P Thornton, V Vetvicka, G D Ross** (1996//). Function of C3 in a humoral response: iC3b/C3dg bound to an immune complex generated with natural antibody and a primary antigen promotes antigen uptake and the expression of co-stimulatory molecules by all B cells, but only

stimulates immunoglobulin synthesis by antigen-specific B cells. *Clinical and experimental immunology*, 104(3), 531

**B S Kim, Y M Park** (1993//). Prevalence of hepatitis C virus related to liver diseases in Korea. *Gastroenterologia Japonica*, 28 Suppl 5(#issue#), 17

**B S Tzang, T Y Chen, T C Hsu, Y C Liu, G J Tsay** (1999//). Presentation of autoantibody to proliferating cell nuclear antigen in patients with chronic hepatitis B and C virus infection. *Annals of the rheumatic diseases*, 58(10), 630

**B Sarov, L Novack, N Beer, J Safi, H Soliman, J S Pliskin, E Litvak, A Yaari, E Shinar** (2007//). Feasibility and cost-benefit of implementing pooled screening for HCVAg in small blood bank settings. *Transfusion medicine (Oxford, England)*, 17(6), 479

**B Weber, W Melchior, R Gehrke, H W Doerr, A Berger, H Rabenau** (2001//). Hepatitis B virus markers in anti-HBc only positive individuals. *Journal of medical virology*, 64(3), 312

**Bailin Tu, Robert N Ziemann, Bryan C Tieman, David J Hawksworth, Joan Tyner, James Scheffel, Mary S Pinkus, Susan E Brophy, Jeffrey M Werneke, Robin Gutierrez, Michael White** (2010//). Generation and characterization of chimeric antibodies against NS3, NS4, NS5, and core antigens of hepatitis C virus. *Clinical and vaccine immunology : CVI*, 17(6), 1040

**Benoit Visseaux, Lucile Larrouy, Ruxandra Calin, Christine Katlama, Thierry Poynard, Vlad Ratziu, Vincent Thibault** (2013//). Anti-hepatitis C virus antibody detection in oral fluid: influence of human immunodeficiency virus co-infection. *Journal of clinical virology : the official publication of the Pan American Society for Clinical Virology*, 58(2), 385

**Bettina Langhans, Ingrid Braunschweiger, Susann Schweitzer, Tilman Sauerbruch, Ulrich Spengler** (2004//). Primary immunisation of hepatitis C virus (HCV)-specific antibody producing B cells by lipidated peptides. *Vaccine*, 22(11-12), 1441

**Bin Tan, Li Qin, ChunXia Chen, ChunYan Huang, Bing Han, LiXin Wang, ZengZhen Wei** (2015//). Multiplex fluorescence quantitative polymerase chain reaction for simultaneous detection of hepatitis B virus, hepatitis C virus and human immunodeficiency virus. *Clinical laboratory*, 61(1-2), 53

**Bo Feng, Rui-Feng Yang, Hai-Ying Zhang, Bi-Fen Luo, Fan-Yun Kong, Hui-Ying Rao, Qian Jin, Xu**



- Cong, Lai Wei** (2015//). Early predictive efficacy of core antigen on antiviral outcomes in genotype 1 hepatitis C virus infected patients. *The Brazilian journal of infectious diseases : an official publication of the Brazilian Society of Infectious Diseases*, 19(4), 390
- Bo Jin, Richard Y Wang, Qi Qiu, Fuminaka Sugauchi, Teresa Grandinetti, Harvey J Alter, J Wai-Kuo Shih** (2007//). Induction of potent cellular immune response in mice by hepatitis C virus NS3 protein with double-stranded RNA. *Immunology*, 122(1), 15
- Bolormaa Dondog, Paul Schnitzler, Kristina M Michael, Gary Clifford, Silvia Franceschi, Michael Pawlita, Tim Waterboer** (2015//). Hepatitis C Virus Seroprevalence in Mongolian Women Assessed by a Novel Multiplex Antibody Detection Assay. *Cancer epidemiology, biomarkers & prevention : a publication of the American Association for Cancer Research, cosponsored by the American Society of Preventive Oncology*, 24(9), 1360
- Boutheina Cherif, Andre Roget, Christian L Villiers, Roberto Calemczuk, Vincent Leroy, Patrice N Marche, Thierry Livache, Marie-Bernadette Villiers** (2006//). Clinically related protein-peptide interactions monitored in real time on novel peptide chips by surface plasmon resonance imaging. *Clinical chemistry*, 52(2), 255
- Brenden C Smith, Yvonne Simpson, Muhammad G Morshed, Laura L E Cowen, Rebecca Hof, Charmaine Wetherell, Caroline E Cameron** (2013//). New proteins for a new perspective on syphilis diagnosis. *Journal of clinical microbiology*, 51(1), 105
- Brian Latimer, Roberta Toporovski, Jian Yan, Panyupa Pankhong, Matthew P Morrow, Amir S Khan, Niranjana Y Sardesai, Seth L Welles, Jeffrey M Jacobson, David B Weiner, Michele A Kutzler** (2014//). Strong HCV NS3/4a, NS4b, NS5a, NS5b-specific cellular immune responses induced in Rhesus macaques by a novel HCV genotype 1a/1b consensus DNA vaccine. *Human vaccines & immunotherapeutics*, 10(8), 2357
- Bruno Cacopardo, Marilia Rita Pinzone, Filippo Palermo, Giuseppe Nunnari** (2012//). Changes in serum Interleukin-33 concentration before and after treatment with pegylated interferon alfa-2a plus ribavirin in patients with chronic hepatitis C genotype 1b infection. *Hepatitis monthly*, 12(12), e7611
- Bruno Fernandes de Oliveira Santos, Nathalie Oliveira de Santana, Alex Vianey Callado Franca** (2011//). Prevalence, genotypes and factors associated with HCV infection among prisoners in Northeastern Brazil. *World journal of gastroenterology*, 17(25), 3027
- Baath L.,Widell A.** (1994//). Anti-GOR without anti-HCV core is not associated with hepatitis C viremia [3] *Vox Sanguinis*, 66(2), 151
- Badr E.A.E.,Korah T.E.,Ghani A.A.,El-Sayed S.,Badr S.** (2014//). Role of serum glypican-3 in the diagnosis and differentiation of small hepatocellular carcinoma from hepatitis-C virus cirrhosis *Alexandria Journal of Medicine*, 50(3), 221
- Bailey J.R.,Dowd K.A.,Snider A.E.,Osburn W.O.,Mehta S.H.,Kirk G.D.,Thomas D.L.,Ray S.C.** (2015//). CD4+ T-Cell-Dependent Reduction in Hepatitis C Virus-Specific Neutralizing Antibody Responses After Coinfection With Human Immunodeficiency Virus *Journal of Infectious Diseases*, 212(6), 914
- Bakir T.M.F.,Halawani M.,Al-Ahdal M.N.,Kessie G.,Ramia S.** (1997//). Significance of serum hepatitis C virus RNA, IgM and IgG antibodies as markers of HCV infection *Medical Science Research*, 25(12), 853
- Baleriola C.,Johal H.,Robertson P.,Jacka B.,Whybin R.,Taylor P.,Rawlinson W.D.** (2012//). Infectious disease screening of blood specimens collected post-mortem provides comparable results to pre-mortem specimens *Cell and Tissue Banking*, 13(2), 251
- Balogun T.M.,Emmanuel S.,Ojerinde E.F.** (2012//). HIV, hepatitis B and C viruses' coinfection among patients in a nigerian tertiary hospital *Pan African Medical Journal*, 12(1), no pagination
- Barril G.,Quiroga J.A.,Arenas M.D.,Espinosa M.,Garcia-Fernandez N.,Cigarran S.,Herrero J.A.,Del Peso G.,Caro P.,Garcia-Agudo R.,Amezquita Y.,Blanco A.,Martinez-Rubio P.,Alcazar J.M.,Gonzalez-Parra E.,Martin-Gomez A.,Castillo I.,Bartolome J.,Carreno V.** (2014//). Impact of isolated hepatitis C virus (HCV) core-specific antibody detection and viral RNA amplification among HCV-seronegative dialysis patients at risk for infection *Journal of Clinical Microbiology*, 52(8), 3053
- Bashir M.F.,Haider M.S.,Rashid N.,Riaz S.** (2013//). Core gene expression and association of genotypes with viral load in hepatitis C virus (HCV) - Infected patients in Punjab Pakistan *Tropical Journal of Pharmaceutical Research*, 12(3), 335
- Bassat H.E.,Ali L.A.,Alm El-Din R.A.,Hasby E.,Shahbah A.** (2013//). Serum level of

interleukin-10 with its gene polymorphism can be predictors of response to treatment in Egyptian patients with chronic hepatitis C virus *Egyptian Journal of Medical Human Genetics*, 14(3), 227

**Batool A.,Khan M.I.,Bano K.A.** (2009//). Efficacy of immunoassay chromatography test for hepatitis-C antibodies detection *Journal of Ayub Medical College, Abbottabad : JAMC*, 21(3), 38

**Beardsley A.M.,LaBrooy J.T.,Rozen L.,Gowans E.J.** (1994//). A comparison of hepatitis C virus (HCV)-RNA and--antibody as markers of infection and predictors of infectivity *Australian and New Zealand journal of medicine*, 24(2), 182

**Beccari M.,Rizzolo L.,Ottolenghi A.,Sorgato G.** (2002//). Hepatitis C virus screening strategies in haemodialysis units [4] *Nephrology Dialysis Transplantation*, 17(8), 1536

**Behzad-Behbahani A.,Mafi-Nejad A.,Tabei S.Z.,Lankarani K.B.,Rashidi M.,Rasouli M.,Pourabbas B.,Torab A.,Salah A.R.** (2005//). Indication of Anti-HBc antibody screening and HBV-DNA detection in diagnosing latent hepatitis B virus infection *Iranian Journal of Medical Sciences*, 30(1), 28

**Beinhardt S.,Aberle J.H.,Strasser M.,Duliclakovic E.,Maieron A.,Kreil A.,Rutter K.,Staettermayer A.F.,Datz C.,Scherzer T.M.,Strassl R.,Bischof M.,Stauber R.,Bodlaj G.,Laferl H.,Holzmann H.,Steindlmunda P.,Ferenci P.,Hofer H.** (2012//). Serum level of IP-10 increases predictive value of IL28B polymorphisms for spontaneous clearance of acute HCV infection *Gastroenterology*, 142(1), 78

**Benkovskaya L.K.,Ivanska N.V.,Sergeyeva T.A.** (2013//). The molecular mimicry and its possible role in origin of false-positive results in HCV-infection testing *Biopolymers and Cell*, 29(5), 406

**Berezin S.W.,Bodenheimer Jr. H.C.** (1992//). Significance of a positive serologic test for hepatitis C *Pediatric Infectious Disease Journal*, 11(3), 340

**Bhardwaj K.,Prasad K.M.,Bhardwaj R.,Bhardwaj B.L.** (2013//). Seroprevalence of HBs ag and HCV in healthy blood donors at a tertiary care hospital in India *Research Journal of Pharmaceutical, Biological and Chemical Sciences*, 4(4), 1272

**Bhat N.A.,Khan M.A.,Shazia,Rafiq M.,Masoodi N.A.** (2002//). Safe blood and its rational use *JK Practitioner*, 9(2), 137

**Bhat N.M.,Kshirsagar M.A.,Bieber M.M.,Teng N.N.H.** (2015//). IgG subclasses and isotypes of vh4-34 encoded antibodies *Immunological Investigations*, 44(4), 400

**Bhattacharya P.,Chandra P.K.,Datta S.,Banerjee A.,Chakraborty S.,Rajendran K.,Basu S.K.,Bhattacharya S.K.,Chakravarty R.** (2007//). Significant increase in HBV, HCV, HIV and syphilis infections among blood donors in West Bengal, Eastern India 2004-2005: Exploratory screening reveals high frequency of occult HBV infection *World Journal of Gastroenterology*, 13(27), 3730

**Biernat M.,Gosciniak G.,Simon K.,Knysz B.,Rotter K.,Grabinska J.,Fleischer K.** (2007//). Helicobacter spp. infection and chronic liver diseases *Advances in Clinical and Experimental Medicine*, 16(4), 537

**Bingulac-Popovic J.,Grahovac B.,Zambeli J.,Mihaljevic I.,Drazic V.,Pirc-Tiljak D.,Petroveckii M.,Balija M.,Grgicevic D.** (1998//). Detection of hepatitis C virus by polymerase chain reaction among Croatian blood donors and patients *Periodicum Biologorum*, 100(3), 389

**Bjoerkvoll B.,Viet L.,Ol H.S.,Lan N.T.,Sothy S.,Hoel H.,Gutteberg T.,Husebekk A.,Larsen S.,Husum H.** (2010//). Screening test accuracy among potential blood donors of HBsAg, anti-HBc and anti-HCV to detect hepatitis B and C virus infection in rural Cambodia and Vietnam *The Southeast Asian journal of tropical medicine and public health*, 41(5), 1127

**Blackard J.T.,Smeaton L.,Hiasa Y.,Horiike N.,Onji M.,Jamieson D.J.,Rodriguez I.,Mayer K.H.,Chung R.T.** (2005//). Detection of hepatitis C virus (HCV) in serum and peripheral-blood mononuclear cells from HCV-monoinfected and HIV/HCV-coinfected persons *Journal of Infectious Diseases*, 192(2), 258

**Bon C.,Brillard B.,Gelineau M.-C.,Mailliavin A.,Trepo C.,Pichot J.** (1998//). Decarboxyprothrombin : Diagnostic value in hepatocellular carcinoma *Annales de Biologie Clinique*, 56(2), 175

**Bonaguidi-Magniaux M.,Pilette C.,Oberti F.,Bidet M.-L.,Cales P.** (1996//). Follow-up of blood donors positive for HCV serology and of their recipients is insufficient *Gastroenterologie Clinique et Biologique*, 20(8-9), 663

**Bonilla N.,Barget N.,Andrieu M.,Roulot D.,Letoumelin P.,Grando V.,Trinchet J.C.,Ganne-Carrie N.,Beaugrand M.,Deny P.,Choppin J.,Guillet J.,Ziol M.** (2006//). Interferon gamma-secreting HCV-specific CD8+ T cells in the liver of patients with chronic C hepatitis: Relation to liver fibrosis - ANRS HC EP07 study *Journal of Viral Hepatitis*, 13(7), 474

**Bonne N.J.,Wong D.T.W.** (2012//). Salivary

biomarker development using genomic, proteomic and metabolomic approaches *Genome Medicine*, 4(10), no pagination

**Bosevska G.,Panovski N.,Dokic E.,Grunevska V.** (2008//). RT-PCR detection of HIV in Republic of Macedonia *Bosnian journal of basic medical sciences / Udruzenje basicnih medicinskih znanosti = Association of Basic Medical Sciences*, 8(4), 350

**Bradley D.W.** (1995//). Hepatitis E virus: A brief review of the biology, molecular virology, and immunology of a novel virus *Journal of Hepatology, Supplement*, 22(1), 140

**Brillanti S.,Masci C.,Miglioli M.,Barbara L.** (1993//). Serum IgM antibodies to hepatitis C virus in acute and chronic hepatitis C *Archives of virology. Supplementum*, 8(#issue#), 213

**Bruno C.M.,Valenti M.,Bertino G.,Ardiri A.,Consolo M.,Mazzarino C.M.,Amoroso A.,Neri S.** (2009//). Altered pattern of circulating matrix metalloproteinases -2, -9 and tissue inhibitor of metalloproteinase-2 in patients with HCV-related chronic hepatitis. Relationship to histological features *Panminerva medica*, 51(4), 191

**Buisson Y.,Teyssou R.** (1996//). Biological diagnosis of hepatic C virus infections *Bulletin de l'Academie nationale de medecine*, 180(6), 1241

**Bull R.A.,Leung P.,Gaudieri S.,Deshpande P.,Cameron B.,Walker M.,Chopra A.,Lloyd A.R.,Luciani F.** (2015//). Transmitted/Founder Viruses Rapidly Escape from CD8+ T Cell Responses in Acute Hepatitis C Virus Infection *Journal of virology*, 89(10), 5478

**Busch M.P.,Korelitz J.J.,Kleinman S.H.,Lee S.R.,Aubuchon J.P.,Schreiber G.B.** (1995//). Declining value of alanine aminotransferase in screening of blood donors to prevent posttransfusion hepatitis B and C virus infection *Transfusion*, 35(11), 903

**Buti M.,Cotrina M.,Chan H.,Jardi R.,Rodriguez F.,Costa X.,Esteban R.,Guardia J.** (2000//). Rapid method for the detection of anti-HCV antibodies in patients with chronic hepatitis C *Revista espanola de enfermedades digestivas : organo oficial de la Sociedad Espanola de Patologia Digestiva*, 92(3), 140

**Butt A.S.,Jacobson I.M.** (2005//). Hepatitis C: Making the diagnosis *Consultant*, 45(9), 955

**Bychkov A.V.,Dorosevich A.E.,D'Souza J.W.** (2009//). Postmortem investigations following human immunodeficiency virus infection *International Journal of Collaborative Research on*

*Internal Medicine and Public Health*, 1(2), 28

**Cameron S.O.,Carman W.F.** (2005//). The use of the OraSure collection device for hepatitis virus testing in health care settings *Journal of clinical virology : the official publication of the Pan American Society for Clinical Virology*, 34 Suppl 1(#issue#), S22

**Carreno V.,Bartolome J.,Castillo I.,Quiroga J.A.** (2012//). New perspectives in occult hepatitis C virus infection *World Journal of Gastroenterology*, 18(23), 2887

**Caspari G.,Gerlich W.H.,Beyer J.,Schmitt H.** (1997//). Non-specific and specific anti-HCV results correlated to age, sex, transaminase, rhesus blood group and follow-up in blood donors *Archives of Virology*, 142(3), 473

**Catelle A.,Edert D.,Renoult E.,Cao Huu T.** (1992//). Incidence of hepatitis C virus in kidney transplantation recipients *Agressologie: revue internationale de physio-biologie et de pharmacologie appliquees aux effets de l'agression*, 33 Spec No 2(#issue#), 99

**Chan C.Y.,Huang Y.S.,Wu J.C.,Lu R.H.,Hwang S.J.,Wang Y.J.,Lee S.D.** (1995//). Detection of antibody to M2 mitochondrial antigen in Chinese patients with primary biliary cirrhosis *Zhonghua yixue za zhi = Chinese medical journal; Free China ed*, 55(3), 214

**Chandrasekaran S.,Palaniappan N.,Krishnan V.,Mohan G.,Chandrasekaran N.** (2000//). Relative prevalence of hepatitis B viral markers and hepatitis C virus antibodies (anti HCV) in Madurai, south India *Indian journal of medical sciences*, 54(7), 270

**Charpentier C.,Champenois K.,Gervais A.,Landman R.,Joly V.,Le Gac S.,Larrouy L.,Damond F.,Brun-Vezinet F.,Descamps D.,Yazdanpanah Y.** (2013//). Predictive Value of Liver Enzymes and Inflammatory Biomarkers for the Severity of Liver Fibrosis Stage in HIV/HCV Co-Infected Patients *PLoS ONE*, 8(3), no pagination

**Charuworm P.,Cheung R.** (2008//). Diagnostic markers for hepatitis virus infection *Expert Opinion on Medical Diagnostics*, 2(3), 303

**Chattoraj A.,Behl R.,Kataria V.K.** (2008//). Infectious disease markers in blood donors *Medical Journal Armed Forces India*, 64(1), 33

**Chauhan R.S.,Cohen Tervaert J.W.,Conrad K.,Cooper G.S.,De Souza Querioz M.L.,Germolec D.R.,Hall A.J.,Ohsawa M.,Philen R.M.,Pieters R.H.H.,Rose N.R.,Van Loveren H.,Vos J.G.,Vickers**

- 1  
2  
3  
4  
5  
6  
7  
8  
9  
10  
11  
12  
13  
14  
15  
16  
17  
18  
19  
20  
21  
22  
23  
24  
25  
26  
27  
28  
29  
30  
31  
32  
33  
34  
35  
36  
37  
38  
39  
40  
41  
42  
43  
44  
45  
46  
47  
48  
49  
50  
51  
52  
53  
54  
55  
56  
57  
58  
59  
60
- C., Damoiseaux J., De Jong W.H., Van Londen K., Colosio C., Corsini E., Descotes J., Lovik M., Luster M.I., Pallardy M., Kunz S.** (2006//). WHO task group on environmental health criteria on principles and methods for assessing autoimmunity associated with exposure to chemicals *Principles and Methods for Assessing Autoimmunity Associated with Exposure to Chemicals, Environmental Health Criteria*, #volume#(236), xi
- Chen J., Liu T., Chen Z., Hou J., Wu Y., Li M.** (2015//). Development of a time-resolved fluorescence immunoassay for Epstein-Barr virus zta iga antibodies in human serum *Viral Immunology*, 28(3), 179
- Chen J.-J., Liu T.-C., Liang Q.-N., Dong Z.-N., Wu Y.-S., Li M.** (2015//). Development of a time-resolved fluorescence immunoassay for Epstein-Barr virus nuclear antigen 1-immunoglobulin A in human serum *Journal of Medical Virology*, 87(11), 1940
- Chen M., Sallaberg M., Sonneborg A., Weiland O., Mattsson L., Jin L., Birkett A., Peterson D., Milich D.R.** (1999//). Limited humoral immunity in hepatitis C virus infection *Gastroenterology*, 116(1), 135
- Chen M., Zheng T., Han S., Zhang L., Bai Y., Fang X., Ding S.-Z., Yang Y.** (2015//). A preliminary study of plasma cyclase-associated protein 2 as a novel biomarker for early stage and alpha-fetoprotein negative hepatocellular carcinoma patients *Clinics and Research in Hepatology and Gastroenterology*, 39(2), 215
- Cheng C., Chenghua S., Ping L., Yizheng T., Qingjun M.** (1996//). Diagnosis of hepatitis C virus (HCV) infection by antigen-capturing ELISA *Clinical and Diagnostic Virology*, 6(2-3), 137
- Chevaliez S.** (2008//). Virological tests in hepatitis B and C *Hepato-Gastro*, 15(5), 345
- Chevaliez S., Rodriguez C., Pawlotsky J.-M.** (2012//). New virologic tools for management of chronic hepatitis B and C *Gastroenterology*, 142(6), 1303
- Choudhury N., Phadke S.** (2001//). Transfusion transmitted diseases *Indian journal of pediatrics*, 68(10), 951
- Christodoulou D., Christou L., Zervou E., Katsanos K., Kitsanou M., Tsianos E.V.** (2007//). Antiplatelet antibodies in patients with chronic viral hepatitis receiving interferon-alpha *Hepato-Gastroenterology*, 54(78), 1761
- Cicchetti A., Ruggeri M., Coretti S., Piscaglia A., Ponziani F.R., Lanati E., Gasbarrini A.** (2011//). Economic evaluation of an anti-HCV screening program in Italy *PharmacoEconomics - Italian Research Articles*, 13(2), 81
- Cleri D.J., Ricketti A.J., Vernaleo J.R.** (2010//). Combating the epidemiology of fear *Dialysis and Transplantation*, 39(5), 184
- Clossais Besnard N., Minjolle S., Gicquel J., Colimon R., Andre P.M.** (1995//). Automated determination of amplified PCR products: application to HCV viremia detection and quantification *Cellular and molecular biology (Noisy-le-Grand, France)*, 41(7), 959
- Cojocaru I.M., Cojocaru M., Burcin C.** (2007//). Ischemic stroke accompanied by anti-PR3 antibody-related cerebral vasculitis and hepatitis C virus infection *Romanian journal of internal medicine = Revue roumaine de medecine interne*, 45(1), 47
- Cojocaru M., Cojocaru I.M., Iacob S.A.** (2004//). Cerebral ischaemic attack in asymptomatic hepatitis C virus infection *Jugoslovenska Medicinska Biohemija*, 23(3), 289
- Cojocaru M., Cojocaru I.M., Matei I., Iacob S.A., Silosi I., Rogoz S.** (2008//). The value of interleukin-6 as a predictor of tissue injury due to hepatitis B virus replication *Archives of the Balkan Medical Union*, 43(1), 15
- Comunale M.A., Rodemich-Betesh L., Hafner J., Wang M., Norton P., di Bisceglie A.M., Block T., Mehta A.** (2010//). Linkage specific fucosylation of alpha-1-antitrypsin in liver cirrhosis and cancer patients: Implications for a biomarker of hepatocellular carcinoma *PLoS ONE*, 5(8), no pagination
- Comunale M.A., Wang M., Anbarasan N., Betesh L., Karabudak A., Moritz E., Devarajan K., Marrero J., Block T.M., Mehta A.** (2013//). Total serum glycan analysis is superior to lectin-FLISA for the early detection of hepatocellular carcinoma *Proteomics - Clinical Applications*, 7(9-10), 690
- Constantinescu I., Diaconu C., Grancea C., Bleontu C., Ruta S.M., Cernescu C.** (1998//). "Trial moves rapidly on, when the judge has determined the sentence beforehand" (W. Scott: Ivanhoe, 36) or pitfalls in serosurvey of anti-hepatitis C antibody in children *Romanian journal of virology*, 49(1-4), 11
- Constantinescu I., Petica M., Hoinarescu M., Oproiu A.** (2001//). Virological, clinical and histopathological aspects in patients with chronic hepatitis C virus infections *Annals of Fundeni Hospital*, 6(2-3), 104



**Coonrod D.V., Jack B.W., Stubblefield P.G., Hollier L.M., Boggess K.A., Cefalo R., Cox S.N., Dunlop A.L., Hunter K.D., Prasad M.R., Lu M.C., Conry J.A., Gibbs R.S., Hogan V.K.** (2008//). The clinical content of preconception care: infectious diseases in preconception care *American Journal of Obstetrics and Gynecology*, 199(6 SUPPL. B), S296

**Costa Z.B., Machado G.C., Avelino M.M., Filho C.G., Filho J.V.M., Minuzzi A.L., Turchi M.D., Stefani M.M.A., de Souza W.V., Martelli C.M.T.** (2009//). Prevalence and risk factors for Hepatitis C and HIV-1 infections among pregnant women in Central Brazil *BMC Infectious Diseases*, 9(#issue#), no pagination

**Coursaget P., Simpson B., el Goulli N., Ben Khelifa H., Kastally R.** (1992//). Hepatitis C core antibody detection in acute hepatitis and cirrhosis patients from Tunisia *Pathologie-biologie*, 40(6), 646

**Cruz-Ruiz M.A., Lopez Diaz F., Gonzalez-Ibarra F.P., Lara-Ortega C., Munoz-Ledo Guzman A.L., Patino-Lopez G.A.** (2013//). Prevalence of Antibodies for the hepatitis C virus in the Lowland (Bajio) region of Mexico *Archives of Medical Research*, 44(5), 390

**Cussenot O., Marie L., Janvier D., Benbunan M., Lassau J.P.** (1999//). Post-mortem detection of HIV, HTLV, hepatitis C viral infections to reduce the risk of contamination during anatomical cadaver dissections *European Journal of Internal Medicine*, 10(4), 223

**C A Schirren, M C Jung, T Worzfeld, M Mamin, G Baretton, J T Gerlach, N H Gruener, R Zachoval, M Houghton, H G Rau, G R Pape** (2001//). Hepatitis C virus-specific CD4+ T cell response after liver transplantation occurs early, is multispecific, compartmentalizes to the liver, and does not correlate with recurrent disease. *The Journal of infectious diseases*, 183(8), 1187

**C Alessandri, M Bombardieri, L Di Prospero, P Conigliaro, F Conti, G Labbadia, R Misasi, M Sorice, G Valesini** (2005//). Anti-lysobisphosphatidic acid antibodies in patients with antiphospholipid syndrome and systemic lupus erythematosus. *Clinical and experimental immunology*, 140(1), 173

**C Alonso, M L Pedroso, S de Sanjose, P Montcharmont, J M Chevre, M J Boucaud, V Lambert, M L Cortey, C Trepo** (1994//). Hepatitis C virus among blood donors: follow-up study. *Transfusion*, 34(6), 527

**C Bon, B Brillard, M C Gelineau, A Mailliavin, C Trepo, J Pichot** (1998//).

[Decarboxyprothrombin: importance in the diagnosis of hepatocellular carcinoma]. *Annales de biologie clinique*, 56(2), 175

**C Cao, C Shi, P Li, Y Tong, Q Ma** (1996//). Diagnosis of hepatitis C virus (HCV) infection by antigen-capturing ELISA. *Clinical and diagnostic virology*, 6(2-3), 137

**C Cattaneo, P A Nuttall, R J Sokol** (1996//). Detection of HIV, hepatitis B and hepatitis C markers in discarded syringes and bloodstains. *Science & justice : journal of the Forensic Science Society*, 36(4), 271

**C F Yoshida, C D Rouzere, R M Nogueira, E Lampe, M A Travassos-da-Rosa, B O Vanderborcht, H G Schatzmayr** (1992//). Human antibodies to dengue and yellow fever do not react in diagnostic assays for hepatitis C virus. *Brazilian journal of medical and biological research = Revista brasileira de pesquisas medicas e biologicas / Sociedade Brasileira de Biofisica ... [et al.]*, 25(11), 1131

**C Ferri, F Greco, G Longombardo, P Palla, A Moretti, E Marzo, P V Fosella, G Pasero, S Bombardieri** (1991//). Antibodies to hepatitis C virus in patients with mixed cryoglobulinemia. *Arthritis and rheumatism*, 34(12), 1606

**C Hyland, C R Seed, P Kiely, S Parker, N Cowley, W Bolton** (2003//). Follow-up of six blood donors highlights the complementary role and limitations of hepatitis C virus antibody and nucleic acid amplification tests. *Vox sanguinis*, 85(1), 1

**C J McIver, C F H Jacques, S S W Chow, S C Munro, G M Scott, J A Roberts, M E Craig, W D Rawlinson** (2005//). Development of multiplex PCRs for detection of common viral pathogens and agents of congenital infections. *Journal of clinical microbiology*, 43(10), 5102

**C Janot, A M Courouze** (1990//). [Importance of the RIBA test for the diagnosis of antibodies against hepatitis C virus. "Viral Hepatitis" Study Group]. *Revue française de transfusion et d'hémiobiologie : bulletin de la Société nationale de transfusion sanguine*, 33(6), 439

**C Jolivet-Reynaud, P Dalbon, F Viola, S Yvon, G Paranhos-Baccala, N Piga, L Bridon, M A Trabaud, N Battail, G Sibai, M Jolivet** (1998//). HCV core immunodominant region analysis using mouse monoclonal antibodies and human sera: characterization of major epitopes useful for antigen detection. *Journal of medical virology*, 56(4), 300

**C L Thio, K R Nolt, J Astemborski, D Vlahov, K E**

**Nelson, D L Thomas** (2000//). Screening for hepatitis C virus in human immunodeficiency virus-infected individuals. *Journal of clinical microbiology*, 38(2), 575

**C L van der Poel, D Bresters, H W Reesink, A A Plaisier, W Schaasberg, A Leentvaar-Kuypers, Q L Choo, S Quan, A Polito, M Houghton** (1992//). Early antihepatitis C virus response with second-generation C200/C22 ELISA. *Vox sanguinis*, 62(4), 208

**C L van der Poel, H W Reesink, W Schaasberg, A Leentvaar-Kuypers, E Bakker, P J Exel-Oehlers, P N Lelie** (1990//). Infectivity of blood seropositive for hepatitis C virus antibodies. *Lancet (London, England)*, 335(8689), 558

**C M Nubling, H Bialleck, A J Fursch, I Scharrer, W Schramm, E Seifried, U Schmidt, S Staszewski, J Lower** (1997//). Frequencies of GB virus C/hepatitis G virus genomes and of specific antibodies in German risk and non-risk populations. *Journal of medical virology*, 53(3), 218

**C Mancini, D Rivanera, D Lilli, G Di Cuonzo, S Angeletti, G Lorino, G M De Sanctis, I G Barbacini, G Leonetti, P Bianchi, L V Chircu, C Galli** (1995//). IgM anti-hepatitis C virus in patients with chronic non-A, non-B hepatitis and their relationship to viral replication. *Clinical and diagnostic virology*, 4(4), 293

**C Micha Nubling, Michael Chudy, Peter Volkers, Johannes Lower** (2006//). Neopterin levels during the early phase of human immunodeficiency virus, hepatitis C virus, or hepatitis B virus infection. *Transfusion*, 46(11), 1886

**C P U Brandao, B L C Marques, V A Marques, C A Villela-Nogueira, K M R Do O, M T de Paula, L L Lewis-Ximenez, E Lampe, J A Sa Ferreira, L M Villar** (2013//). Simultaneous detection of hepatitis C virus antigen and antibodies in dried blood spots. *Journal of clinical virology: the official publication of the Pan American Society for Clinical Virology*, 57(2), 98

**C Payan, F Bloch, I Gaultier, L Belec** (1995//). Single-step reverse transcription-polymerase chain reaction for hepatitis C virus RNA with DNA enzyme immunoassay hybridization. *Journal of virological methods*, 53(2-3), 167

**C Prezzi, M A Casciaro, V Francavilla, E Schiaffella, L Finocchi, L V Chircu, G Bruno, A Sette, S Abrignani, V Barnaba** (2001//). Virus-specific CD8(+) T cells with type 1 or type 2 cytokine profile are related to different disease activity in chronic hepatitis C virus infection. *European journal of immunology*, 31(3), 894

**C S Huang, M S Ho, C S Yang, C L Lee, C A Tan** (1993//). Hepatitis C markers in hemodialysis patients. *Journal of clinical microbiology*, 31(7), 1764

**C T Fang, S P Field, M P Busch, A du P Heyns** (2003//). Human immunodeficiency virus-1 and hepatitis C virus RNA among South African blood donors: estimation of residual transfusion risk and yield of nucleic acid testing. *Vox sanguinis*, 85(1), 9

**C T Yeh, C M Han, S Y Lo, J H Ou, K D Fan, I S Sheen, C M Chu, Y F Liaw** (1994//). Early detection of anti-HCc antibody in acute hepatitis C virus (HCV) by western blot (immunoblot) using a recombinant HCV core protein fragment. *Journal of clinical microbiology*, 32(9), 2235

**C Trepo, A M Courouce, L Noel** (1990//). [Discovery of the hepatitis C virus]. *Presse medicale (Paris, France : 1983)*, 19(34), 1582

**C Trepo, C Alonso, J S Li, D Qu, F Laurent, L Vitvitski** (1994//). [Limits of immunoserologic and molecular diagnosis of hepatitis C]. *Nuclear medicine and biology*, 21(3), 419

**C W Carson, D L Conn, A J Czaja, T L Wright, M E Brecher** (1993//). Frequency and significance of antibodies to hepatitis C virus in polyarteritis nodosa. *The Journal of rheumatology*, 20(2), 304

**Carlos Madrid, Bruno Courtois, Damien Duran** (2004//). Chronic Sialadenitis revealing hepatitis C: a case report. *Medicina oral : organo oficial de la Sociedad Espanola de Medicina Oral y de la Academia Iberoamericana de Patologia y Medicina Bucal*, 9(4), 328

**Carolyn Edler, Birgit Wulff, Ann-Sophie Schroder, Ina Wilkemeyer, Susanne Polywka, Thomas Meyer, Ulrich Kalus, Axel Pruss** (2011//). A prospective time-course study on serological testing for human immunodeficiency virus, hepatitis B virus and hepatitis C virus with blood samples taken up to 48 h after death. *Journal of medical microbiology*, 60(Pt 7), 920

**Caroline Aparicio, Thomas Mourez, Guy Simoneau, Jean-Dominique Magnier, Bertrand Galichon, Patrick Plaisance, Jean-Francois Bergmann, Pierre Sellier** (2012//). [Proposal of HIV, HBV and HCV targeted screening: short period feasibility study in a free-access outpatient medical structure]. *Presse medicale (Paris, France : 1983)*, 41(10), e517

**Cem Cengiz, Ulus S Akarca, Erdem Goker, Gul Yuce** (2003//). Detection of mutant p53 in hepatocellular cancer from Turkey and its

correlation with clinicopathologic parameters. *Digestive diseases and sciences*, 48(5), 865

**Chao-Jun Hu, Guang Song, Wei Huang, Guo-Zhen Liu, Chui-Wen Deng, Hai-Pan Zeng, Li Wang, Feng-Chun Zhang, Xuan Zhang, Jun Seop Jeong, Seth Blackshaw, Li-Zhi Jiang, Heng Zhu, Lin Wu, Yong-Zhe Li** (2012//). Identification of new autoantigens for primary biliary cirrhosis using human proteome microarrays. *Molecular & cellular proteomics : MCP*, 11(9), 669

**Chen-Ji Huang, Hwei-Ling Peng, Chih-Yu Cheng** (2011//). Improving antigenicity of the recombinant hepatitis C virus core protein via random mutagenesis. *Journal of biomedicine & biotechnology*, 2011(#issue#), 359042

**Christian Molleken, Barbara Sitek, Corinna Henkel, Gereon Poschmann, Bence Sipos, Sebastian Wiese, Bettina Warscheid, Christoph Broelsch, Markus Reiser, Scott L Friedman, Ida Tornoe, Anders Schlosser, Gunter Kloppel, Wolff Schmiegel, Helmut E Meyer, Uffe Holmskov, Kai Stuhler** (2009//). Detection of novel biomarkers of liver cirrhosis by proteomic analysis. *Hepatology (Baltimore, Md.)*, 49(4), 1257

**Christos Liaskos, Gary L Norman, Anargyros Moulas, Athanasios Garagounis, Ioannis Goulis, Eirini I Rigopoulou, George N Dalekos** (2010//). Prevalence of gastric parietal cell antibodies and intrinsic factor antibodies in primary biliary cirrhosis. *Clinica chimica acta; international journal of clinical chemistry*, 411(5-6), 411

**Chunfeng Wang, Lianfeng Zhang, Xuanmei Shen** (2013//). Development of a nucleic acid lateral flow strip for detection of hepatitis C virus (HCV) core antigen. *Nucleosides, nucleotides & nucleic acids*, 32(2), 59

**Cicioglu Aridogan Buket, Aynali Ayse, Kaya Selcuk, Onal Suleyman, Sesli Cetin Emel** (2014//). Comparison of HCV core antigen and anti-HCV with HCV RNA results. *African health sciences*, 14(4), 816

**Claude Tayou Tagny, Dora Mbanya, Edward L Murphy, Jean-Jacques Lefrere, Syria Laperche** (2014//). Screening for hepatitis C virus infection in a high prevalence country by an antigen/antibody combination assay versus a rapid test. *Journal of virological methods*, 199(#issue#), 119

**Claudia Matteucci, Roberta Sorrentino, Lia Bellis, Giuseppe Maria Ettorre, Valentina Svicher, Roberto Santoro, Giovanni Vennarecci, Alessandra Biasiolo, Patrizia Pontisso, Daria Scacciarelli, Luca Beneduce, Cesare Sarrecchia,**

**Paolo Casalino, Sergio Bernardini, Pasquale Pierimarchi, Enrico Garaci, Claudio Puoti, Guido Rasi** (2014//). Detection of high levels of Survivin-immunoglobulin M immune complex in sera from hepatitis C virus infected patients with cirrhosis. *Hepatology research : the official journal of the Japan Society of Hepatology*, 44(9), 1008

**Clement Barjon, Toshiro Niki, Benjamin Verillaud, Paule Opolon, Pierre Bedossa, Mitsuomi Hirashima, Stephanie Blanchin, Michel Wassef, Hugo R Rosen, Anne-Sophie Jimenez, Ming Wei, Pierre Busson** (2012//). A novel monoclonal antibody for detection of galectin-9 in tissue sections: application to human tissues infected by oncogenic viruses. *Infectious agents and cancer*, 7(1), 16

**Cornelia Ottiger, Nicole Gygli, Andreas R Huber** (2013//). Detection limit of architect hepatitis C core antigen assay in correlation with HCV RNA, and renewed confirmation algorithm for reactive anti-HCV samples. *Journal of clinical virology : the official publication of the Pan American Society for Clinical Virology*, 58(3), 535

**D B Smith, F Davidson, P Simmonds** (1995//). Hepatitis C virus variants and the role of genotyping. *Journal of hepatology*, 23 Suppl 2(#issue#), 26

**D Brown, L Powell, A Morris, S Rassam, S Sherlock, N McIntyre, A J Zuckerman, G M Dusheiko** (1992//). Improved diagnosis of chronic hepatitis C virus infection by detection of antibody to multiple epitopes: confirmation by antibody to synthetic oligopeptides. *Journal of medical virology*, 38(3), 167

**D M Watts, A L Corwin, M A Omar, K C Hyams** (1994//). Low risk of sexual transmission of hepatitis C virus in Somalia. *Transactions of the Royal Society of Tropical Medicine and Hygiene*, 88(1), 55

**D M Wolk, M F Jones, J E Rosenblatt** (2001//). Laboratory diagnosis of viral hepatitis. *Infectious disease clinics of North America*, 15(4), 1109

**D Michael Strong, Louis Katz** (2002//). Blood-bank testing for infectious diseases: how safe is blood transfusion?. *Trends in molecular medicine*, 8(7), 355

**D N Amarapurkar, A Kumar, S Vaidya, P Murti, S K Bichile, R H Kalro, H G Desai** (1992//). Frequency of hepatitis B, C and D and human immunodeficiency virus infections in multi-transfused thalasseemics. *Indian journal of gastroenterology : official journal of the Indian Society of Gastroenterology*, 11(2), 80

**D P Bogdanos, G N Dalekos** (2008//). Enzymes as target antigens of liver-specific autoimmunity: the case of cytochromes P450s. *Current medicinal chemistry*, 15(22), 2285

**D R Gretch** (1997//). Diagnostic tests for hepatitis C. *Hepatology (Baltimore, Md.)*, 26(3 Suppl 1), 43S

**D Roth, J A Fernandez, S Babischkin, A De Mattos, B E Buck, S Quan, L Olson, G W Burke, J R Nery, V Esquenazi** (1992//). Detection of hepatitis C virus infection among cadaver organ donors: evidence for low transmission of disease. *Annals of internal medicine*, 117(6), 470

**D Saadoun, S Sadallah, M Trendelenburg, N Limal, D Sene, J C Piette, J A Schifferli, P Cacoub** (2006//). Anti-C1q antibodies in hepatitis C virus infection. *Clinical and experimental immunology*, 145(2), 308

**D Sansonno, G Lauletta, F Dammacco** (2004//). Detection and quantitation of HCV core protein in single hepatocytes by means of laser capture microdissection and enzyme-linked immunosorbent assay. *Journal of viral hepatitis*, 11(1), 27

**D Sene, P Ghillani-Dalbin, N Limal, V Thibault, T van Boekel, J-C Piette, P Cacoub** (2006//). Anti-cyclic citrullinated peptide antibodies in hepatitis C virus associated rheumatological manifestations and Sjogren's syndrome. *Annals of the rheumatic diseases*, 65(3), 394

**D T Abdourakhmanov, A S Hasaev, F J Castro, J Guardia** (1998//). Epidemiological and clinical aspects of hepatitis C virus infection in the Russian Republic of Daghestan. *European journal of epidemiology*, 14(6), 549

**D Villalta, M G Alessio, M Tampoia, A Da Re, S Stella, M Da Re, R Tozzoli, N Bizzaro** (2009//). Accuracy of the first fully automated method for anti-cardiolipin and anti-beta2 glycoprotein I antibody detection for the diagnosis of antiphospholipid syndrome. *Annals of the New York Academy of Sciences*, 1173(#issue#), 21

**D Y Chien, Q L Choo, A Tabrizi, C Kuo, J McFarland, K Berger, C Lee, J R Shuster, T Nguyen, D L Moyer** (1992//). Diagnosis of hepatitis C virus (HCV) infection using an immunodominant chimeric polyprotein to capture circulating antibodies: reevaluation of the role of HCV in liver disease. *Proceedings of the National Academy of Sciences of the United States of America*, 89(21), 10011

**Dale M Netski, Tim Mosbrugger, Erik Depla, Geert Maertens, Stuart C Ray, Robert G**

**Hamilton, Stacy Roundtree, David L Thomas, Jane McKeating, Andrea Cox** (2005//). Humoral immune response in acute hepatitis C virus infection. *Clinical infectious diseases : an official publication of the Infectious Diseases Society of America*, 41(5), 667

**Dale M Netski, Xiao-Hong Wang, Shruti H Mehta, Kenrad Nelson, David Celentano, Satawat Thongsawat, Niwat Maneekarn, Vinai Suriyanon, Jaroon Jittiwutikorn, David L Thomas, John R Ticehurst** (2004//). Hepatitis C virus (HCV) core antigen assay to detect ongoing HCV infection in thai injection drug users. *Journal of clinical microbiology*, 42(4), 1631

**Damien Lucidarme, Anne Decoster, Catherine Delamare, Christophe Schmitt, David Kozlowski, Jean Harbonnier, Claude Jacob, Christian Cyran, Gerard Forzy, Christine Defer, Daniele Ilef, Julien Emmanuelli, Bernard Filoche** (2003//). [An inter-laboratory study of anti-HCV antibody detection in saliva samples]. *Gastroenterologie clinique et biologique*, 27(2), 159

**Danilo Villalta, Maria G Mytilinaiou, Martina Elsner, Christian Hentschel, Juliane Cuccato, Valentina Somma, Peter Schierack, Dirk Roggenbuck, Dimitrios P Bogdanos** (2015//). Autoantibodies to asialoglycoprotein receptor (ASGPR) in patients with autoimmune liver diseases. *Clinica chimica acta; international journal of clinical chemistry*, 450(#issue#), 1

**Danilo Villalta, Nicola Bizzaro, Mirella Da Re, Renato Tozzoli, Lars Komorowski, Elio Tonutti** (2008//). Diagnostic accuracy of four different immunological methods for the detection of anti-F-actin autoantibodies in type 1 autoimmune hepatitis and other liver-related disorders. *Autoimmunity*, 41(1), 105

**David D Kim, David W Hutton, Ahmed A Raouf, Mohsen Salama, Ahmed Hablas, Ibrahim A Seifeldin, Amr S Soliman** (2015//). Cost-effectiveness model for hepatitis C screening and treatment: Implications for Egypt and other countries with high prevalence. *Global public health*, 10(3), 296

**David J Woollard, Gholamreza Haqshenas, Xuebin Dong, Bridget F Pratt, Stephen J Kent, Eric J Gowans** (2008//). Virus-specific T-cell immunity correlates with control of GB virus B infection in marmosets. *Journal of virology*, 82(6), 3054

**Delphine Desbois, Parissa Vaghefi, Jeanine Savary, Elisabeth Dussaix, Anne-Marie Roque-Afonso** (2008//). Sensitivity of a rapid immunochromatographic test for hepatitis C antibodies



detection. *Journal of clinical virology : the official publication of the Pan American Society for Clinical Virology*, 41(2), 129

**Delphine Feron, Cathy Charlier, Victor Gourain, Laurent Garderet, Marianne Coste-Burel, Patrice Le Pape, Pierre Weigel, Yannick Jacques, Sylvie Hermouet, Edith Bigot-Corbel** (2013//). Multiplexed infectious protein microarray immunoassay suitable for the study of the specificity of monoclonal immunoglobulins. *Analytical biochemistry*, 433(2), 202

**Dennis G Fisher, Kristen L Hess, Erlyana Erlyana, Grace L Reynolds, Catherine A Cummins, Todd A Alonzo** (2015//). Comparison of Rapid Point-of-Care Tests for Detection of Antibodies to Hepatitis C Virus. *Open forum infectious diseases*, 2(3), ofv101

**Domenico Sansonno, Sabino Russi, Silvia Sansonno, Fabio Pavone, Franco Dammacco** (2015//). Thymic stromal lymphopoietin in hepatitis C virus-related cryoglobulinemic vasculitis: gene expression level and protein distribution. *Arthritis research & therapy*, 17(#issue#), 62

**Douglas Lienesch, Robert Morris, Allan Metzger, Paige Debuys, Kenneth Sherman** (2005//). Absence of cyclic citrullinated peptide antibody in nonarthritic patients with chronic hepatitis C infection. *The Journal of rheumatology*, 32(3), 489

**Dragica Terzic, Branko Brmbolic, Djordje Singer, Brankica Dupanovic, Milos Korac, Dubravka Selemovic, Neda Svrtlih, Nenad Draskovic, Boban Mugosa, Ivan Boricic, Zoran Terzic** (2008//). Liver enlargement associated with opportunistic infections in patients with human immunodeficiency virus infection. *Journal of gastrointestinal and liver diseases : JGLD*, 17(4), 401

**Dror D Siman-Tov, Romy Zemel, Ran Tur Kaspas, Jonathan M Gershoni** (2013//). The use of epitope arrays in immunodiagnosis of infectious disease: hepatitis C virus, a case study. *Analytical biochemistry*, 432(2), 63

**Da Costa A.N., Plymouth A., Santos-Silva D., Ortiz-Cuaran S., Camey S., Guilloureau P., Sangrajrang S., Khuhaprema T., Mendy M., Lesi O.A., Chang H.-K., Oh J.-K., Lee D.-H., Shin H.-R., Kirk G.D., Merle P., Beretta L., Hainaut P.** (2015//). Osteopontin and latent-TGF beta binding-protein 2 as potential diagnostic markers for HBV-related hepatocellular carcinoma *International Journal of Cancer*, 136(1), 172

**Dahle J., Schagemann G., Moennig V., Liess B.** (1993//). Clinical, virological and serological

findings after intranasal inoculation of pigs with bovine viral diarrhoea virus and subsequent intranasal challenge with hog cholera virus *Zentralblatt fur Veterinarmedizin. Reihe B. Journal of veterinary medicine. Series B*, 40(1), 46

**Dalekos G.N., Manoussakis M.N., Zervou E., Tsianos E.V., Moutsopoulos H.M.** (1993//). Immunologic and viral markers in the circulation of anti-HIV negative heroin addicts *European Journal of Clinical Investigation*, 23(4), 219

**Dao T., Lecoite I., Galateau F., Freymuth F., Rideau A., Verwaerde J.-C., Valla A.** (1993//). Contribution of liver biopsy and hepatitis B virus antibodies to the diagnosis of persistent and moderate elevation of aminotransferases *Gastroenterologie Clinique et Biologique*, 17(1), 37

**Das S., Harendra Kumar M.L.** (2012//). Viral hepatitis among the blood donors in a rural based hospital: A five year study *Journal of Clinical and Diagnostic Research*, 6(4 SUPPL. 2), 619

**Das U., Kar P., Gopalkrishna V., Sharma J.K., Madan K., Das B.C.** (1999//). Comparative evaluation of hepatitis C virus infection in serum and liver tissue of patients with chronic liver disease by reverse transcription-polymerase chain reaction *Clinical Microbiology and Infection*, 5(5), 256

**De Medina M., Hill M., Sullivan H.O., Leclercq B., Pennell J.P., Jeffers L., Reddy K.R., Schiff E.R., Perez G.O.** (1998//). Detection of anti-hepatitis C virus antibodies in patients undergoing dialysis by utilizing a hepatitis C virus 3,0 assay: Correlation with hepatitis C virus RNA *Journal of Laboratory and Clinical Medicine*, 132(1), 73

**De Souza V.A.U.F., Sumita L.M., Nascimento M.-C., Oliveira J., Mascheretti M., Quiroga M., Freire W.S., Tateno A., Boulos M., Mayaud P., Pannuti C.S.** (2007//). Human herpesvirus-8 infection and oral shedding in Amerindian and non-Amerindian populations in the Brazilian Amazon Region *Journal of Infectious Diseases*, 196(6), 844

**Derbala M., Rizk N., Shebl F., Alkaabi S., Eldweik N., John A., Sharma M., Yaqoob R., Almohanadi M., Butt M., Alejji K.** (2012//). Interleukin-28 and hepatitis C virus genotype-4: Treatment-induced clearance and liver fibrosis *World Journal of Gastroenterology*, 18(47), 7003

**Ding J., Takada A., Yamada N., Tsutsumi M., Date T.** (1998//). Study of hepatitis C virus genotype in Guizhou area of southwestern China *Chinese Medical Journal*, 111(2), 128

**Ding J., Yi Y., Su Q., Qiu F., Jia Z., Bi S.** (2014//). High

expression of small hepatitis D antigen in Escherichia coli and ELISA for diagnosis of hepatitis D virus *Journal of Virological Methods*, 197(#issue#), 34

**Dipti C.A.,Jain S.K.,Navin K.** (2006//). A novel recombinant multi-epitope protein as a hepatitis C diagnostic intermediate of high sensitivity and specificity *Protein Expression and Purification*, 47(1), 319

**Djebbi A.,Sadraoui A.,Triki H.** (2003//). Comparison of different methods for genotyping hepatitis C virus *Annales de Biologie Clinique*, 61(6), 689

**Dou J.,Liu K.,Chen Z.,Wo J.,He N.,Liu Y.,Zhang M.,Wang X.,Xu C.** (1999//). Effect of immunization in mice with recombinant DNA encoding the hepatitis C virus structural protein *Chinese medical journal*, 112(11), 1036

**Dow B.C.** (1999//). Microbiology confirmatory tests for blood donors *Blood Reviews*, 13(2), 91

**Dow D.C.** (2000//). 'Noise' in microbiological screening assays *Transfusion Medicine*, 10(2), 97

**Dubois F.,Barin F.,Goudeau A.** (1998//). Anti-HCV immunoblot: Its use for confirmation of initial screening and follow-up of hepatitis C infection *Annales de Biologie Clinique*, 56(4), 417

**Dumaidi K.,Al-Jawabreh A.** (2014//). Prevalence of occult HBV among hemodialysis patients in two districts in the northern part of the West Bank, Palestine *Journal of medical virology*, 86(10), 1694

**Dumestre-Perard C.,Ponard D.,Drouet C.,Leroy V.,Zarski J.-P.,Dutertre N.,Colomb M.G.** (2002//). Complement C4 monitoring in the follow-up of chronic hepatitis C treatment *Clinical and Experimental Immunology*, 127(1), 131

**Durand F.,Danic B.,Tardivel R.,Semana G.,Gouezec H.,Martinot M.,Marcellin P.,Beauplet A.** (2000//). Detection of an HCV chronic carrier state without anti-HCV antibody in a blood donor during 28 months *Transfusion Clinique et Biologique*, 7(3), 242

**Dwyer R.** (2004//). The ADVIA Centaur infectious disease assays: A technical review *Journal of Clinical Virology*, 30(SUPPL. 1), S1

**Edelenyi-Pinto M.,Carvalho A.P.,Nogueira C.,Ferreira Junior O.,Schechter M.** (1993//). Prevalence of antibodies to hepatitis C virus in populations at low and high risk for sexually transmitted diseases in Rio de Janeiro *Memorias do Instituto Oswaldo Cruz*, 88(2), 305

**Ehrnsperger M.,Hergersberg C.,Wienhues U.,Nichtl A.,Buchner J.** (1998//). Stabilization of proteins and peptides in diagnostic immunological assays by the molecular chaperone Hsp25 *Analytical Biochemistry*, 259(2), 218

**Eissa S.,Swellam M.,El Ahmady O.,Hamdy H.,Youssef M.,Khalifa A.** (2002//). Clinical significance of circulating p53 autoantibodies in hepatocellular carcinoma and chronic HCV patients in relation to AFP and ferritin levels *Cancer Molecular Biology*, 9(1), 1773

**El Aggan H.A.,Sidkey F.,El Gezery D.A.,Ghoneim E.** (2004//). Circulating anti-HLA antibodies in patients with chronic hepatitis C: relation to disease activity *The Egyptian journal of immunology / Egyptian Association of Immunologists*, 11(2), 71

**El Bassuoni M.A.,Obada M.A.,Korah T.,El Sayed S.** (2008//). Assessment of Treg cells CD4+CD25+ in chronic cirrhotic liver disease and hepatocellular carcinoma Egyptian patients *Hepatitis Monthly*, 8(3), 173

**El-Gindy I.,El Rahman A.T.,El-Alim M.A.,Zaki S.S.** (2003//). Diagnostic potential of serum matrix metalloproteinase-2 and tissue inhibitor of metalloproteinase-1 as non-invasive markers of hepatic fibrosis in patients with HCV related chronic liver disease *The Egyptian journal of immunology / Egyptian Association of Immunologists*, 10(1), 27

**el-Kady I.M.,el-Masry S.A.,Badra G.,Halafawy K.A.** (2004//). Different cytokine patterns in patients coinfecting with hepatitis C virus and *Schistosoma mansoni* *The Egyptian journal of immunology / Egyptian Association of Immunologists*, 11(1), 23

**El-Kamary S.S.,Hashem M.,Saleh D.A.,Abdelwahab S.F.,Sobhy M.,Shebl F.M.,Shardell M.D.,Strickland G.T.,Shata M.T.** (2013//). Hepatitis C virus-specific cell-mediated immune responses in children born to mothers infected with hepatitis C virus *Journal of Pediatrics*, 162(1), 148

**el-Sayed Zaki M.,el-Adrosy H.** (2004//). Recent approach for diagnosis of early HCV infection *The Egyptian journal of immunology / Egyptian Association of Immunologists*, 11(1), 123

**El-Zefzafy W.,Eltokhy H.,El-Ghaffar Mohamed N.A.,Abu-Zahab Z.** (2015//). Significance of serum cytokeratin-18 in prediction of hepatocellular carcinoma in chronic hepatitis C infected Egyptian patients *Macedonian Journal of Medical Sciences*, 3(1), 117

**Elbouaishi A., Rhoma N., Turki M., Fituri O., Elbousaife A., Grera A.** (2010//). Nephrotic syndrome in Libyan children *Jamahiriya Medical Journal*, 10(3), 199

**Eldin S.S., Seddik I., Daef E.A., Shata M.T., Raafat M., Abdel Baky L., Nafeh M.A.** (2010//). Risk factors and immune response to hepatitis E viral infection among acute hepatitis patients in Assiut, Egypt *The Egyptian journal of immunology / Egyptian Association of Immunologists*, 17(1), 73

**Elgohry I., Elbanna A., Hashad D.** (2012//). Occult hepatitis B virus infection in a cohort of Egyptian chronic hemodialysis patients *Clinical Laboratory*, 58(9-10), 1057

**Elira Doekias A., Okandze-Elenga J.P., Gouary Kinkouna A.S., Bokilo Dzia Lefoundzou A., Garcia S.** (2003//). Seroprevalence of viral hepatitis C in multitransfused patients at university hospital of Brazzaville *Bulletin de la Societe de Pathologie Exotique*, 96(4), 279

**Elkayam O., Segal R., Bendayan D., van Uitert R., Onnekink C., Pruijn G.J.M.** (2010//). The anti-cyclic citrullinated peptide response in tuberculosis patients is not citrulline-dependent and sensitive to treatment *Arthritis Research and Therapy*, 12(1), no pagination

**Elzouki A.-N.Y., Gargoum H.M., Habas E.M., Rayani A.A., Othman M.** (2014//). Impact of hepatitis C infection on renal transplant patients: a single-center experience in Libya *Saudi journal of kidney diseases and transplantation : an official publication*

**E A Beckers, P M Thijssen, T Nijdam, D J Van Rhenen** (1994//). Evaluation of anti-HCV ELISA seropositivity in voluntary blood donors: a proposal for donor counseling strategies. *Infusionstherapie und Transfusionsmedizin*, 21(3), 143

**E A Gudim, I I Agapov, I S Komolov, A G Tonevitskii** (2005//). Humoral immune response to recombinant viral NS3 protein in patients with hepatitis C. *Bulletin of experimental biology and medicine*, 139(1), 77

**E Ballot, J C Homberg, C Johanet** (2000//). Antibodies to soluble liver antigen: an additional marker in type 1 auto-immune hepatitis. *Journal of hepatology*, 33(2), 208

**E Buratti, M Di Michele, P Song, C Monti-Bragadin, E A Scodeller, F E Baralle, S G Tisminetzky** (1997//). Improved reactivity of hepatitis C virus core protein epitopes in a conformational antigen-presenting system. *Clinical*

*and diagnostic laboratory immunology*, 4(2), 117

**E Farma, E Boeri, P Bettini, C M Repetto, J McDermott, F B Lillo, O E Varnier** (1996//). Single-step PCR in molecular diagnosis of hepatitis C virus infection. *Journal of clinical microbiology*, 34(12), 3171

**E Gobin, J M Desruelle, J P Vigier** (2001//). [Evaluation of the analytic performance of blood collection tubes (BD Vacutainer SST) for the screening of anti-HIV, anti-HTLV, anti-HCV, anti-HBc, anti-CMV antibodies, and of HBs, P24 HIV antigens, and of alanine aminotransferase]. *Transfusion clinique et biologique : journal de la Societe francaise de transfusion sanguine*, 8(1), 44

**E H Frost** (1993//). Investigation of sera reactive to hepatitis C virus by second-generation enzyme immunoassay. *Journal of clinical microbiology*, 31(1), 163

**E J Gordon, R Bhat, Q Liu, Y F Wang, C Tackney, A M Prince** (2000//). Immune responses to hepatitis C virus structural and nonstructural proteins induced by plasmid DNA immunizations. *The Journal of infectious diseases*, 181(1), 42

**E Jirillo, N M Pellegrino, G Piazzolla, D Caccavo, S Antonaci** (2000//). Hepatitis C virus infection: immune responsiveness and interferon-alpha treatment. *Current pharmaceutical design*, 6(2), 169

**E K Kolho, T Krusius** (1992//). Risk factors for hepatitis C virus antibody positivity in blood donors in a low-risk country. *Vox sanguinis*, 63(3), 192

**E Kainne Dokubo, Jennifer Evans, Valerie Winkelman, Sherri Cyrus, Leslie H Tobler, Alice Asher, Alya Briceno, Kimberly Page** (2014//). Comparison of Hepatitis C Virus RNA and antibody detection in dried blood spots and plasma specimens. *Journal of clinical virology : the official publication of the Pan American Society for Clinical Virology*, 59(4), 223

**E Kocabas, N Aksaray, E Alhan, F Yarkin, F Koksal, Y Kilinc** (1997//). Hepatitis B and C virus infections in Turkish children with haemophilia. *Acta paediatrica (Oslo, Norway : 1992)*, 86(10), 1135

**E Kolho, R Naukkarinen, T Krusius** (1992//). Specificity and sensitivity of two second-generation ELISA tests in detecting hepatitis C antibodies in blood donors known to be reactive with a supplemental assay. *Vox sanguinis*, 63(2), 158

**E Kovalenko, F Tacke, O A Gressner, H W Zimmermann, B Lahme, A Janetzko, T**

- 1  
2  
3  
4  
5  
6  
7  
8  
9  
10  
11  
12  
13  
14  
15  
16  
17  
18  
19  
20  
21  
22  
23  
24  
25  
26  
27  
28  
29  
30  
31  
32  
33  
34  
35  
36  
37  
38  
39  
40  
41  
42  
43  
44  
45  
46  
47  
48  
49  
50  
51  
52  
53  
54  
55  
56  
57  
58  
59  
60
- Wiederholt, T Berg, T Muller, C Trautwein, A M Gressner, R Weiskirchen** (2009//). Validation of connective tissue growth factor (CTGF/CCN2) and its gene polymorphisms as noninvasive biomarkers for the assessment of liver fibrosis. *Journal of viral hepatitis*, 16(9), 612
- E Kurstak, C Kurstak, A Hossain, A Al Tuwaijri** (1995//). Current status of the molecular genetics of hepatitis C virus and its utilization in the diagnosis of infection. *Clinical and diagnostic virology*, 3(1), 1
- E L Leikin, J F Reinus, E Schmall, N Tejani** (1994//). Epidemiologic predictors of hepatitis C virus infection in pregnant women. *Obstetrics and gynecology*, 84(4), 529
- E L Murphy, S Bryzman, A E Williams, H Co-Chien, G B Schreiber, H E Ownby, R O Gilcher, S H Kleinman, L Matijas, R A Thomson, G J Nemo** (1996//). Demographic determinants of hepatitis C virus seroprevalence among blood donors. *JAMA*, 275(13), 995
- E Lawlor, J Power, J Garson, P Yap, F Davidson, G Columb, D Smith, L Pomeroy, J O'Riordan, P Simmonds, R Tedder** (1999//). Transmission rates of hepatitis C virus by different batches of a contaminated anti-D immunoglobulin preparation. *Vox sanguinis*, 76(3), 138
- E M Bloch, A Shah, Z Kaidarova, S Laperche, J-J Lefrere, J van Hasselt, P Zacharias, E L Murphy, Anglophone Africa Transfusion Research Group** (2014//). A pilot external quality assurance study of transfusion screening for HIV, HCV and HBsAG in 12 African countries. *Vox sanguinis*, 107(4), 333
- E Orito, M Mizokami, T Tanaka, J Y Lau, K Suzuki, M Yamauchi, Y Ohta, A Hasegawa, S Tanaka, M Kohara** (1996//). Quantification of serum hepatitis C virus core protein level in patients chronically infected with different hepatitis C virus genotypes. *Gut*, 39(6), 876
- E R Schiff, M de Medina, R S Kahn** (1999//). New perspectives in the diagnosis of hepatitis C. *Seminars in liver disease*, 19 Suppl 1(#issue#), 3
- E Tanaka, C Ohue, K Aoyagi, K Yamaguchi, S Yagi, K Kiyosawa, H J Alter** (2000//). Evaluation of a new enzyme immunoassay for hepatitis C virus (HCV) core antigen with clinical sensitivity approximating that of genomic amplification of HCV RNA. *Hepatology (Baltimore, Md.)*, 32(2), 388
- E Tanaka, K Kiyosawa, A Matsumoto, T Kashiwakuma, A Hasegawa, H Mori, O Yanagihara, Y Ohta** (1996//). Serum levels of hepatitis C virus core protein in patients with chronic hepatitis C treated with interferon alfa. *Hepatology (Baltimore, Md.)*, 23(6), 1330
- E Tanaka, K Kiyosawa, T Seki, A Matsumoto, T Sodeyama, S Furuta, T Kumagai, M Kohara** (1993//). Low prevalence of hepatitis C virus infection in patients with auto-immune hepatitis type 1. *Journal of gastroenterology and hepatology*, 8(5), 442
- E Tanaka, M Tacke, M Kobayashi, Y Nakatsuji, K Kiyosawa, S Schmolke, A M Engel, G Hess, H J Alter** (1998//). Past and present hepatitis G virus infections in areas where hepatitis C is highly endemic and those where it is not endemic. *Journal of clinical microbiology*, 36(1), 110
- E Vardas, F Sitas, K Seidel, A Casteling, J Sim** (1999//). Prevalence of hepatitis C virus antibodies and genotypes in asymptomatic, first-time blood donors in Namibia. *Bulletin of the World Health Organization*, 77(12), 965
- E Zucca, E Roggero, N Maggi-Solca, A Conconi, F Bertoni, I Reilly, D Castelli, E Pedrinis, J C Piffaretti, F Cavalli** (2000//). Prevalence of Helicobacter pylori and hepatitis C virus infections among non-Hodgkin's lymphoma patients in Southern Switzerland. *Haematologica*, 85(2), 147
- E Zuckerman, T Zuckerman, A M Levine, D Douer, K Gutekunst, M Mizokami, D G Qian, M Velankar, B N Nathwani, T L Fong** (1997//). Hepatitis C virus infection in patients with B-cell non-Hodgkin lymphoma. *Annals of internal medicine*, 127(6), 423
- Edgar D Charles, Michael I M Orloff, Eiko Nishiuchi, Svetlana Marukian, Charles M Rice, Lynn B Dustin** (2013//). Somatic hypermutations confer rheumatoid factor activity in hepatitis C virus-associated mixed cryoglobulinemia. *Arthritis and rheumatism*, 65(9), 2430
- Edith Hintermann, Martin Holdener, Monika Bayer, Stephanie Loges, Josef M Pfeilschifter, Claude Granier, Michael P Manns, Urs Christen** (2011//). Epitope spreading of the anti-CYP2D6 antibody response in patients with autoimmune hepatitis and in the CYP2D6 mouse model. *Journal of autoimmunity*, 37(3), 242
- Edna Maria Vissoci Reiche, Ingridt Hildegard Vogler, Helena Kaminami Morimoto, Andre Luis Bortoliero, Tiemi Matsuo, Katia Kioko Yuahasi, Sanderson Junior Cancian, Roberto Setsuo Koguichi** (2003//). Evaluation of surrogate markers for human immunodeficiency virus infection among blood donors at the blood bank of "Hospital Universitario Regional Norte do Parana",



Londrina, PR, Brazil. *Revista do Instituto de Medicina Tropical de Sao Paulo*, 45(1), 23

**Edouard Tuaille, Anne-Marie Mondain, Fadi Meroueh, Laure Ottomani, Marie-Christine Picot, Nicolas Nagot, Philippe Van de Perre, Jacques Ducos** (2010//). Dried blood spot for hepatitis C virus serology and molecular testing. *Hepatology (Baltimore, Md.)*, 51(3), 752

**Eirini I Rigopoulou, Ioannis Stefanidis, Christos Liaskos, Eleftheria K Zervou, Christos Rizos, Paraskevi Mina, Kalliopi Zachou, Christos Syrganis, Eftichios Patsidis, George Kyriakopoulos, Lambros Sdrakas, Nikolaos Tsianias, Georgios N Dalekos** (2005//). HCV-RNA qualitative assay based on transcription mediated amplification improves the detection of hepatitis C virus infection in patients on hemodialysis: results from five hemodialysis units in central Greece. *Journal of clinical virology : the official publication of the Pan American Society for Clinical Virology*, 34(1), 81

**Eirini I Rigopoulou, Maria Mytilinaiou, Ourania Romanidou, Christos Liaskos, George N Dalekos** (2007//). Autoimmune hepatitis-specific antibodies against soluble liver antigen and liver cytosol type 1 in patients with chronic viral hepatitis. *Journal of autoimmune diseases*, 4(issue#), 2

**Eishiro Mizukoshi, Michelina Nascimbeni, Joshua B Blaustein, Kathleen Mihalik, Charles M Rice, T Jake Liang, Stephen M Feinstone, Barbara Rehermann** (2002//). Molecular and immunological significance of chimpanzee major histocompatibility complex haplotypes for hepatitis C virus immune response and vaccination studies. *Journal of virology*, 76(12), 6093

**Elena Bartoloni, Alessia Alunno, Onelia Bistoni, Nicola Bizzaro, Paola Migliorini, Gabriella Morozzi, Andrea Doria, Alessandro Mathieu, Milvia Lotzniker, Flavio Allegri, Valeria Ricciari, Claudia Alpini, Armando Gabrielli, Marilina Tampoia, Roberto Gerli, Forum Interdisciplinare per la Ricerca nelle Malattie Autoimmuni (FIRMA) investigators** (2012//). Diagnostic value of anti-mutated citrullinated vimentin in comparison to anti-cyclic citrullinated peptide and anti-viral citrullinated peptide 2 antibodies in rheumatoid arthritis: an Italian multicentric study and review of the literature. *Autoimmunity reviews*, 11(11), 815

**Ellen Heck, Allen Brown, H Dwight Cavanagh** (2013//). Nucleic acid testing and tissue safety: an eye bank's five-year review of HIV and hepatitis testing for donor corneas. *Cornea*, 32(4), 503

**Elyanne Gault, Patrick Soussan, Yoann Morice, Lara Sanders, Assia Berrada, Brian Rogers, Paul Deny** (2003//). Evaluation of a new serotyping assay for detection of anti-hepatitis C virus type-specific antibodies in serum samples. *Journal of clinical microbiology*, 41(5), 2084

**Emiko Hayashi, Yutaka Motomura, Hirofumi Shirakawa, Toshiaki Yoshikawa, Nobuyuki Oba, Shuta Nishinakagawa, Yasuhiro Mizuguchi, Tatsuya Kojima, Kazuhiro Nomura, Tetsuya Nakatsura** (2009//). Detection of glypican-3-specific CTLs in chronic hepatitis and liver cirrhosis. *Oncology reports*, 22(1), 149

**Emma C Thomson, Eleni Nastouli, Janice Main, Peter Karayiannis, Joseph Eliahoo, David Muir, Myra O McClure** (2009//). Delayed anti-HCV antibody response in HIV-positive men acutely infected with HCV. *AIDS (London, England)*, 23(1), 89

**Emmanuel Nna, Chinenye Mbamalu, Ifeoma Ekejindu** (2014//). Occult hepatitis B viral infection among blood donors in South-Eastern Nigeria. *Pathogens and global health*, 108(5), 223

**Erdem Akbal, Seyfettin Koklu, Erdem Kocak, Basak Cakal, Fahri Gunes, Omer Basar, Yasar Tuna, Mehmet Senes** (2013//). Liver fatty acid-binding protein is a diagnostic marker to detect liver injury due to chronic hepatitis C infection. *Archives of medical research*, 44(1), 34

**Erin Wigglesworth, Alan Heath, Harvey Holmes** (2010//). Development of a World Health Organisation International Reference Panel for Anti-HIV. *Journal of virological methods*, 163(1), 101

**Erman Timurdogan, B Erdem Alaca, I Halil Kavakli, Hakan Urey** (2011//). MEMS biosensor for detection of Hepatitis A and C viruses in serum. *Biosensors & bioelectronics*, 28(1), 189

**Essam M Elsayy, Mohamed A Sobh, Farha A El-Chenawi, Ihab M Hassan, Ahmad B Shehab El-Din, Mohamed A Ghoneim** (2005//). Serotyping of hepatitis C virus in hemodialysis patients: comparison with a standardized genotyping assay. *Diagnostic microbiology and infectious disease*, 51(2), 91

**Eva A Operskalski, James W Mosley, Leslie H Tobler, Eberhard W Fiebig, Marek J Nowicki, Larry T Mimms, James Gallarda, Bruce H Phelps, Michael P Busch, Transfusion-Transmitted Viruses Study, Retrovirus Epidemiology Donor Study** (2003//). HCV viral load in anti-HCV-reactive donors and infectivity for their recipients. *Transfusion*, 43(10), 1433

1  
2  
3  
4  
5  
6  
7  
8  
9  
10  
11  
12  
13  
14  
15  
16  
17  
18  
19  
20  
21  
22  
23  
24  
25  
26  
27  
28  
29  
30  
31  
32  
33  
34  
35  
36  
37  
38  
39  
40  
41  
42  
43  
44  
45  
46  
47  
48  
49  
50  
51  
52  
53  
54  
55  
56  
57  
58  
59  
60

**Everton Hadlich, Mario Reis Alvares-Da-Silva, Rafaela Komorowski Dal Molin, Raquel Zenker, Luciano Zubaran Goldani** (2007//). Hepatitis C virus (HCV) viremia in HIV-infected patients without HCV antibodies detectable by third-generation enzyme immunoassay. *Journal of gastroenterology and hepatology*, 22(9), 1506

**F Cassani, L Muratori, P Manotti, M Lenzi, M Fusconi, G Ballardini, L Selleri, U Volta, D Zauli, R Miniero** (1992//). Serum autoantibodies and the diagnosis of type-1 autoimmune hepatitis in Italy: a reappraisal at the light of hepatitis C virus infection. *Gut*, 33(9), 1260

**F Cassani, P Valentini, M Cataleta, P Manotti, R Francesconi, F Giostra, G Ballardini, M Lenzi, D Zauli, F B Bianchi** (1997//). Ultrasound-detected abdominal lymphadenopathy in chronic hepatitis C: high frequency and relationship with viremia. *Journal of hepatology*, 26(3), 479

**F Dammacco, D Sansonno, A Beardley, E J Gowans** (1993//). Failure to detect hepatitis C virus (HCV) genome by polymerase chain reaction in human anti-HCV-positive intravenous immunoglobulins. *Clinical and experimental immunology*, 92(2), 205

**F De Filippi, M Fraquelli, D Conte, R Soffredini, D Prati, G Ronchi, A Zanella, E Del Ninno, M Colombo** (1998//). High prevalence but low pathogenicity of hepatitis G virus infection in Italian patients with genetic haemochromatosis. *Italian journal of gastroenterology and hepatology*, 30(5), 529

**F Dubois, F Barin, A Goudeau** (1998//). [Anti-HCV serology for screening, diagnosis and surveillance of hepatitis C: role of the immunoblot]. *Annales de biologie clinique*, 56(4), 417

**F Durand, B Danic, R Tardivel, G Semana, H Gouezec, M Martinot, P Marcellin, A Beauplet** (2000//). [Discovery of a chronic HVC infection without seroconversion in a blood donor in France during 28 months]. *Transfusion clinique et biologique : journal de la Societe francaise de transfusion sanguine*, 7(3), 242

**F E Preston, L M Jarvis, M Makris, L Philp, J C Underwood, C A Ludlam, P Simmonds** (1995//). Heterogeneity of hepatitis C virus genotypes in hemophilia: relationship with chronic liver disease. *Blood*, 85(5), 1259

**F Ebeling** (1991//). Alanine aminotransferase, gamma-glutamyltransferase, antibodies to hepatitis B core antigen and antibodies to hepatitis C virus in blood donor screening. A prospective study in Finland. *Vox sanguinis*, 60(4), 219

**F Ebeling, J Leikola** (1991//). Post-transfusion hepatitis. *Annals of medicine*, 23(4), 361

**F Fabrizi, G Lunghi, I Guarnori, L Raffaele, G Erba, A Pagano, F Locatelli** (1996//). IgM antibody response to hepatitis C virus in end-stage renal disease. *Nephrology, dialysis, transplantation : official publication of the European Dialysis and Transplant Association - European Renal Association*, 11(2), 314

**F Fabrizi, G Lunghi, I Guarnori, L Raffaele, S Di Filippo, G Erba, A Pagano, F Locatelli** (1995//). Virological characteristics of hepatitis C virus infection in chronic hemodialysis patients: a cross-sectional study. *Clinical nephrology*, 44(1), 49

**F Izzo, F Cremona, P Delrio, E Leonardi, G Castello, S Pignata, B Daniele, S A Curley** (1999//). Soluble interleukin-2 receptor levels in hepatocellular cancer: a more sensitive marker than alpha fetoprotein. *Annals of surgical oncology*, 6(2), 178

**F T al-Mahroos, A Ebrahim** (1995//). Prevalence of hepatitis B, hepatitis C and human immune deficiency virus markers among patients with hereditary haemolytic anaemias. *Annals of tropical paediatrics*, 15(2), 121

**Fabian C Franzeck, Ramadhani Ngwale, Bernadeta Msongole, Marian Hamisi, Omary Abdul, Lars Henning, Emilio Letang, Geoffrey Mwaigomole, Manuel Battegay, Christoph Hatz, Marcel Tanner** (2013//). Viral hepatitis and rapid diagnostic test based screening for HBsAg in HIV-infected patients in rural Tanzania. *PLoS one*, 8(3), e58468

**Fabrice Bonnet, Jean-Jacques Pineau, Jean-Luc Taupin, Anne Feyler, Mojgan Bonarek, Sten de Witte, Noelle Bernard, Denis Lacoste, Philippe Morlat, Jacques Beylot** (2003//). Prevalence of cryoglobulinemia and serological markers of autoimmunity in human immunodeficiency virus infected individuals: a cross-sectional study of 97 patients. *The Journal of rheumatology*, 30(9), 2005

**Fan Chen, Si-Chong Chen, Jing Zhou, Zhi-De Chen, Fang Chen** (2015//). Identification of aptamer-binding sites in hepatitis C virus envelope glycoprotein e2. *Iranian journal of medical sciences*, 40(1), 63

**Faris Q Alenzi, Eman M El-Nashar, Saad S Al-Ghamdi, Mohammed Y Abbas, Abubaker M Hamad, Osama M El-Saeed, Richard K H Wyse, Mahmoud Lotfy** (2010//). Original Article: Investigation of Bcl-2 and PCNA in Hepatocellular Carcinoma: Relation to Chronic HCV. *Journal of the*

Egyptian National Cancer Institute, 22(1), 87

**Feng Yang, Jason M Robotham, Henry Grise, Stephen Frausto, Vanesa Madan, Margarita Zayas, Ralf Bartenschlager, Margaret Robinson, Andrew E Greenstein, Anita Nag, Timothy M Logan, Ewa Bienkiewicz, Hengli Tang** (2010//). A major determinant of cyclophilin dependence and cyclosporine susceptibility of hepatitis C virus identified by a genetic approach. *PLoS pathogens*, 6(9), e1001118

**Feng-Bo Wu, Hai-Qiao Ouyan, Xiao-Yan Tang, Zhen-Xian Zhou** (2008//). Double-antigen sandwich time-resolved immunofluorometric assay for the detection of anti-hepatitis C virus total antibodies with improved specificity and sensitivity. *Journal of medical microbiology*, 57(Pt 8), 947

**Fengxiang Gao, Elizabeth A Talbot, Carol H Loring, Jill J Power, Jodie Dionne-Odom, Sharon Alroy-Preis, Patricia Jackson, Christine L Bean** (2014//). Performance of the OraQuick HCV rapid antibody test for screening exposed patients in a hepatitis C outbreak investigation. *Journal of clinical microbiology*, 52(7), 2650

**Fernando Herz Wolff, Sandra Costa Fuchs, Ajacio B M Brandao** (2011//). Absence of occult hepatitis B among blood donors in southern Brazil. *The Brazilian journal of infectious diseases : an official publication of the Brazilian Society of Infectious Diseases*, 15(2), 159

**Filippo Ansaldi, Bianca Bruzzone, Stefania Salmaso, Maria Cristina Rota, Paolo Durando, Roberto Gasparini, Giancarlo Icardi** (2005//). Different seroprevalence and molecular epidemiology patterns of hepatitis C virus infection in Italy. *Journal of medical virology*, 76(3), 327

**Flavia F Fernandes, Maria L Ferraz, Luiz E Andrade, Alessandra Dellavance, Carlos Terra, Gustavo Pereira, Joao L Pereira, Frederico Campos, Fatima Figueiredo, Renata M Perez** (2015//). Enhanced liver fibrosis panel as a predictor of liver fibrosis in chronic hepatitis C patients. *Journal of clinical gastroenterology*, 49(3), 235

**Florence Komurian-Pradel, Alain Rajoharison, Jean-Luc Berland, Valerie Khouri, Magali Perret, Mark Van Roosmalen, Stanislas Pol, Francesco Negro, Glaucia Paranhos-Baccala** (2004//). Antigenic relevance of F protein in chronic hepatitis C virus infection. *Hepatology (Baltimore, Md.)*, 40(4), 900

**Francesco Dati** (2004//). An update on laboratory productivity with infectious disease assays on the

Bayer ADVIA Centaur Immunoassay System. *Clinical laboratory*, 50(1-2), 53

**Francois Rouet, Marie-Laure Chaix, Andre Inwoley, Philippe Msellati, Ida Viho, Patrice Combe, Valerie Leroy, Francois Dabis, Christine Rouzioux, ANRS 1236 DITRAME-B&C Study Group** (2004//). HBV and HCV prevalence and viraemia in HIV-positive and HIV-negative pregnant women in Abidjan, Cote d'Ivoire: the ANRS 1236 study. *Journal of medical virology*, 74(1), 34

**Fumio Nomura, Kazuyuki Sogawa, Kenta Noda, Masanori Seimiya, Kazuyuki Matsushita, Toshihide Miura, Takeshi Tomonaga, Hideyuki Yoshitomi, Fumio Imazeki, Hiroataka Takizawa, Kaoru Mogushi, Masaru Miyazaki, Osamu Yokosuka** (2012//). Serum anti-Ku86 is a potential biomarker for early detection of hepatitis C virus-related hepatocellular carcinoma. *Biochemical and biophysical research communications*, 421(4), 837

**Fabregas B.C., Moura A.S., de Avila R.E., Faria M.N., Carmo R.A., Teixeira A.L.** (2014//). Sexual dysfunction and dissatisfaction in chronic hepatitis C patients *Revista da Sociedade Brasileira de Medicina Tropical*, 47(5), 564

**Fabrizi F., Poordad F.F., Martin P.** (2001//). Diagnostic workup of hepatitis C and the patient on maintenance dialysis *International Journal of Artificial Organs*, 24(12), 843

**Ferguson M.C.** (2011//). Current therapies for chronic hepatitis C *Pharmacotherapy*, 31(1), 92

**Fernando S., Fernando S.S., Sheriff M.H., Vitarana U.T.** (2001//). Antibodies to hepatitis C virus in patients who have had multiple transfusions in Sri Lanka *The Ceylon medical journal*, 46(3), 91

**Ferrari C., Valli A., Galati L., Penna A., Scaccaglia P., Giuberti T., Schianchi C., Missale G., Marin M.G., Fiaccadori F.** (1994//). T-cell response to structural and nonstructural hepatitis C virus antigens in persistent and self-limited hepatitis C virus infections *Hepatology*, 19(2), 286

**Ferrin G., Ranchal I., Llamaza C., Rodriguez-Peralvarez M.L., Romero-Ruiz A., Aguilar-Melero P., Lopez-Cillero P., Briceno J., Muntane J., Montero-Alvarez J.L., De la Mata M.** (2014//). Identification of candidate biomarkers for hepatocellular carcinoma in plasma of HCV-infected cirrhotic patients by 2-D DIGE *Liver international : official journal of the International Association for the Study of the Liver*, 34(3), 438

**Fong H.-F., Christian C.W.** (2012//). Evaluating

Sexually Transmitted Infections in Sexually Abused Children: New Techniques to Identify Old Infections *Clinical Pediatric Emergency Medicine*, 13(3), 202

**Forsgren M.,Strannegard O.** (2007//). Clinical virology in Sweden *APMIS*, 115(5), 401

**Fouad S.A.,Elsaaid N.H.,Mohamed N.A.,Abutaleb O.M.** (2014//). Diagnostic value of serum level of soluble tumor necrosis factor receptor IIalpha in Egyptian patients with chronic hepatitis C virus infection and hepatocellular carcinoma #journal#, 14(9), no pagination

**Fournillier A.,Nakano I.,Vitvitski L.,Depla E.,Vidalin O.,Maertens G.,Trepo C.,Inchauspe G.** (1998//). Modulation of immune responses to hepatitis C virus envelope E2 protein following injection of plasmid DNA using single or combined delivery routes *Hepatology*, 28(1), 237

**Fox J.M.,Newton R.,Bedaj M.,Keding A.,Molyneux E.,Carpenter L.M.,Martin F.,Mutalima N.** (2015//). Prevalence of hepatitis C virus in mothers and their children in Malawi *Tropical Medicine and International Health*, 20(5), 638

**Freeman A.J.,Marinos G.,Ffrench R.A.,Lloyd A.R.** (2005//). Intrahepatic and peripheral blood virus-specific cytotoxic T lymphocyte activity is associated with a response to combination IFN-alpha and ribavirin treatment among patients with chronic hepatitis C virus infection *Journal of Viral Hepatitis*, 12(2), 125

**Frider B.,Sookoian S.,Castano G.,Gonzalez J.,Flichman D.,Viudez P.,Dawson G.J.,Schlauder G.G.,Mushahwar I.K.** (1998//). Detection of hepatitis G virus RNA in patients with acute non-A-E hepatitis *Journal of Viral Hepatitis*, 5(3), 161

**Fruttero E.R.,Picciolo G.,De Matteis J.A.** (2015//). Operative performances and efficiency for infectious disease testing of two immunochemistry analyzers - Abbott ARCHITECT i2000SR and DiaSorin Liaison XL *Clinical Chemistry and Laboratory Medicine*, 53(1), e19

**Fujimoto N.,Kyo M.,Ichikawa Y.,Fukunishi T.,Nagano S.** (1994//). The impact of hepatitis C virus infection on liver disease in renal transplant recipients *Transplant international : official journal of the European Society for Organ Transplantation*, 7 Suppl 1(#issue#), S346

**Fukuda S.,Suzuki T.,Nagayama R.,Tsuda F.,Kojima M.,Okamoto H.,Tanaka T.,Miyakawa Y.,Mayumi M.** (1994//). Hepatitis C virus RNA in blood units with antibodies detectable by a second-generation passive hemagglutination assay,

antibodies to synthetic core peptides or elevated transaminase levels *Transfusion Science*, 15(1), 83

**Ganczak M.,Bohatyrewicz A.,Korzen M.,Karakiewicz B.** (2012//). The comparison of sharps injuries reported by doctors versus nurses from surgical wards in the context of the prevalence of HBV, HCV and HIV infections *Polski Przegląd Chirurgiczny/ Polish Journal of Surgery*, 84(4), 190

**Ganesh H.R.,Krishna Prasad M.S.,Vimal Kumar K.,Veena Shetty A.** (2013//). Seroprevalence of leptospirosis among patients with acute febrile illness - A prospective study *Biomedicine (India)*, 33(3), 341

**Garbuglia A.R.,Monachetti A.,Galli C.,Sabatini R.,Ferreri M.L.,Capobianchi M.R.,Bagnarelli P.** (2014//). HCV core antigen and HCV-RNA in HIV/HCV co-infected patients with different HCV genotypes *BMC infectious diseases*, 14(#issue#), 222

**Gasiorowski J.,Marchewka Z.,Lapinski L.,Szymanska B.,Glowacka K.,Knysz B.,Dlugosz A.,Wiela-Hojenska A.** (2013//). The investigation of specific biochemical markers in monitoring kidney function of drug addicts *Postepy Higieny i Medycyny Doswiadczalnej*, 67(#issue#), 1214

**Gatselis N.K.,Georgiadou S.P.,Tassopoulos N.,Zachou K.,Liaskos C.,Hatzakis A.,Dalekos G.N.** (2005//). Impact of parietal cell autoantibodies and non-organ-specific autoantibodies on the treatment outcome of patients with hepatitis C virus infection: A pilot study *World Journal of Gastroenterology*, 11(4), 482

**Ghorbani M.,Nass T.,Azizi A.,Soare C.,Aucoin S.,Giulivi A.,Anderson D.E.,Diaz-Mitoma F.** (2005//). Comparison of antibody- and cell-mediated immune responses after intramuscular hepatitis C immunizations of BALB/c mice *Viral Immunology*, 18(4), 637

**Gish R.G.,Qian K.,Brooks L.,Leung J.,Xu Y.,Pike I.,Lau J.Y.N.** (1999//). Characterization of anti-hepatitis C virus-positive sera not genotyped by restriction fragment length polymorphism or serology *Journal of Gastroenterology and Hepatology (Australia)*, 14(4), 339

**Gish R.G.,Warmerdam M.T.,Zeldis J.B.,Keeffe E.B.,Nakazato P.,Lim J.,Cox K.,Kuramoto I.K.,Fry K.E.,Yarborough P.O.,Moeckli R.,Yun-Cho K.,Reyes G.R.** (1993//). Variation in antibody reactivity to the hepatitis C virus by comparative immunoscreening and enzyme immunoassay *Viral Immunology*, 6(1), 49

**Gobin E.,Desruelle J.M.,Vigier J.P.** (2001//).



Evaluation of evacuated blood collection tubes (BD Vacutainer™ SST™) analytical performances for the screening of anti-HIV, anti-HLV, anti-HCV, anti-HBc, anti-HBs, anti-CMV antibodies, and of HBS, P24 HIV antigens and for the assay of alanine aminotransferase *Transfusion Clinique et Biologique*, 8(1), 44

**Goergen B., Jakobs S., Symmons P., Hornes E., Meyer Zum Buschenfelde K.-H., Gerken G.** (1994//). Quantitation of HCV-replication using one-step competitive reverse transcription-polymerase chain reaction and a solid phase, colorimetric detection method *Journal of Hepatology*, 21(4), 678

**Goffin E., Pirson Y., Cornu C., Jadoul M., van Ypersele de Strihou C.** (1994//). Significance of NS3 and NS5 antigens in screening for HCV antibody *Lancet*, 343(8901), 854

**Gojak R., Ferhatovic M., Bajramovic N., Hadzic A., Gazibera B., Bankovic D.** (2012//). Importance of quick test for screening of former drug users *Medicinski arhiv*, 66(3 Suppl 1), 30

**Gomes Y.M., Pereira V.R., Nakazawa M., Rosa D.S., Barros M.D., Ferreira A.G., Silva E.D., Ogatta S.F., Krieger M.A., Goldenberg S.** (2001//). Serodiagnosis of chronic Chagas infection by using EIE-Recombinant-Chagas-Biomanguinhos kit *Memorias do Instituto Oswaldo Cruz*, 96(4), 497

**Gong J., Zhu C., Zhuang R., Song C., Li Q., Xu Z., Wei Y., Yang K., Yang A., Chen L., Jin B.** (2009//). Establishment of an enzyme-linked immunosorbent assay system for determining soluble CD96 and its application in the measurement of sCD96 in patients with viral hepatitis B and hepatic cirrhosis *Clinical and Experimental Immunology*, 155(2), 207

**Gorodin S., Unal S., Wang Y., Mikhaylov M.I., Bigbulatova L., Jehuda-Cohen T.** (2013//). New tools in HCV diagnosis, in light of the enhanced awareness and the new drugs for treatment: SMARTube and stimmunology *The Scientific World Journal*, 2013(#issue#), no pagination

**Goudeau A., Dubois F.** (2000//). Biological diagnosis and follow-up of hepatitis C virus infections *Revue du Praticien*, 50(10), 1071

**Greer S., Alexander G.J.M.** (1995//). Viral serology and detection *Bailliere's Clinical Gastroenterology*, 9(4), 689

**Gretch D.R.** (1997//). Use and interpretation of HCV diagnostic tests in the clinical setting *Clinics in liver disease*, 1(3), 543

**Griffiths S.J., Koegl M., Boutell C., Zenner H.L., Crump C.M., Pica F., Gonzalez O., Friedel C.C., Barry G., Martin K., Craigon M.H., Chen R., Kaza L.N., Fossum E., Fazakerley J.K., Efstathiou S., Volpi A., Zimmer R., Ghazal P., Haas J.** (2013//). A Systematic Analysis of Host Factors Reveals a Med23-Interferon-lambda Regulatory Axis against Herpes Simplex Virus Type 1 Replication *PLoS Pathogens*, 9(8), no pagination

**Gu W.-M., Yang Y., Wang Q.-Z., Pan B.-S., Guo W., Wu L., Hu W.-Z., Yang S., Song B.-B., Zhang C.-Y.** (2013//). Comparing the performance of traditional non-treponemal tests on syphilis and non-syphilis serum samples *International Journal of STD and AIDS*, 24(12), 919

**Guobuzaitė A., Chokshi S., Balciuniene L., Voinic A., Stikleryte A., Zagminas K., Ambrozaitis A., Naoumov N.** (2008//). Viral clearance or persistence after acute hepatitis C infection: interim results from a prospective study *Medicina (Kaunas, Lithuania)*, 44(7), 510

**Gupta P.K., Kumar H., Basannar D.R., Jaiprakash M.** (2006//). Transfusion transmitted infections in armed forces: Prevalence and trends *Medical Journal Armed Forces India*, 62(4), 348

**Gupta S.K.** (2003//). Status of immunodiagnosis and immunocontraceptive vaccines in India *Advances in biochemical engineering/biotechnology*, 85(#issue#), 181

**Gupte G.M., Arankalle V.A.** (2012//). Evaluation of the immunogenicity of liposome encapsulated HVR1 and NS3 regions of genotype 3 HCV, either singly or in combination *Virology Journal*, 9(#issue#), no pagination

**Guttikonda S., Wang W., Suresh M.** (2004//). Molecular zipper assays: a simple homosandwich with the sensitivity of PCR *Journal of pharmacy & pharmaceutical sciences : a publication of the Canadian Society for Pharmaceutical Sciences, Societe canadienne des sciences pharmaceutiques*, 7(4), 7

**G Caspari, W H Gerlich, J Beyer, H Schmitt** (1995//). Age, sex and transaminase dependency of specific and nonspecific results from enzyme immunoassays for antibodies to hepatitis C virus and follow-up of blood donors. *Infusionstherapie und Transfusionsmedizin*, 22(4), 208

**G Dalagiorgou, N Vassilaki, P Foka, A Boumlic, A Kakkanas, E Kochlios, S Khalili, E Aslanoglou, S Veletza, G Orfanoudakis, D Vassilopoulos, S J Hadziyannis, J Koskinas, P Mavromara** (2011//). High levels of HCV core+1 antibodies in HCV

patients with hepatocellular carcinoma. *The Journal of general virology*, 92(Pt 6), 1343

**G Gitnick** (1992//). Hepatitis C: what progress?. *Scandinavian journal of gastroenterology. Supplement*, 192(#issue#), 50

**G Grohmann, R I Glass, J Gold, M James, P Edwards, T Borg, S E Stine, C Goldsmith, S S Monroe** (1991//). Outbreak of human calicivirus gastroenteritis in a day-care center in Sydney, Australia. *Journal of clinical microbiology*, 29(3), 544

**G Harcourt, E Gomperts, S Donfield, P Klenerman** (2006//). Diminished frequency of hepatitis C virus specific interferon gamma secreting CD4+ T cells in human immunodeficiency virus/hepatitis C virus coinfecting patients. *Gut*, 55(10), 1484

**G Icardi, P Bonanni, A M Raffo, A Masini, L Orione, M De Martini, P Crovari** (1997//). Evaluation of performance of the RIBA processor system for automated analysis of the strip immunoblot assay for detection of antibodies to hepatitis C virus. *Journal of clinical microbiology*, 35(9), 2331

**G J Kotwal** (1993//). Routine laboratory diagnosis of hepatitis C virus infection. *Journal of hepatology*, 17 Suppl 3(#issue#), S83

**G J Kotwal, V K Rustgi, B M Baroudy** (1992//). Detection of hepatitis C virus-specific antigens in semen from non-A, non-B hepatitis patients. *Digestive diseases and sciences*, 37(5), 641

**G J van Doornum, A Lodder, M Buimer, E J van Ameijden, S Bruisten** (2001//). Evaluation of hepatitis C antibody testing in saliva specimens collected by two different systems in comparison with HCV antibody and HCV RNA in serum. *Journal of medical virology*, 64(1), 13

**G La Torre, E De Vito, E Langiano, P Petta, G Colarossi, L Cipriani, M Tucciarone, G Ricciardi** (2003//). Epidemiology of hepatitis C virus antibodies in blood donors from the province of Latina, Italy. *European journal of epidemiology*, 18(7), 691

**G Longombardo, C Ferri, S Marchi, F Costa, F Lombardini, L Vacri, S Bombardieri, P Migliorini** (1998//). Immune response to an epitope of the NS4 protein of hepatitis C virus in HCV-related disorders. *Clinical immunology and immunopathology*, 87(2), 124

**G Maio, P d'Argenio, T Stroffolini, A Bozza, L Sacco, M E Tosti, M Intorcia, E Fossi, G d'Alessio,**

**L A Kondili, M Rapicetta, A Mele** (2000//). Hepatitis C virus infection and alanine transaminase levels in the general population: a survey in a southern Italian town. *Journal of hepatology*, 33(1), 116

**G Michel, A Ritter, G Gerken, K H Meyer zum Buschenfelde, R Decker, M P Manns** (1992//). Anti-GOR and hepatitis C virus in autoimmune liver diseases. *Lancet (London, England)*, 339(8788), 267

**G Missale, E Cariani, V Lamonaca, A Ravaggi, A Rossini, R Bertoni, M Houghton, Y Matsuura, T Miyamura, F Fiaccadori, C Ferrari** (1997//). Effects of interferon treatment on the antiviral T-cell response in hepatitis C virus genotype 1b- and genotype 2c-infected patients. *Hepatology (Baltimore, Md.)*, 26(3), 792

**G N Dalekos, K G Kistis, D S Boumba, P Voulgari, E K Zervou, A A Drosos, E V Tsianos** (2000//). Increased incidence of anti-cardiolipin antibodies in patients with hepatitis C is not associated with aetiopathogenetic link to anti-phospholipid syndrome. *European journal of gastroenterology & hepatology*, 12(1), 67

**G V Papatheodoridis, J K Delladetsima, A Katsoulidou, V Sypsa, M Albrecht, G Michel, A Hatzakis, N C Tassopoulos** (1997//). Significance of IgM anti-HCV core level in chronic hepatitis C. *Journal of hepatology*, 27(1), 36

**Gabriel Chamie, Maurizio Bonacini, David R Bangsberg, Jack T Stapleton, Christopher Hall, E Turner Overton, Rebecca Scherzer, Phyllis C Tien** (2007//). Factors associated with seronegative chronic hepatitis C virus infection in HIV infection. *Clinical infectious diseases : an official publication of the Infectious Diseases Society of America*, 44(4), 577

**Georg M Lauer, Kei Ouchi, Raymond T Chung, Tam N Nguyen, Cheryl L Day, Deborah R Purkis, Markus Reiser, Arthur Y Kim, Michaela Lucas, Paul Klenerman, Bruce D Walker** (2002//). Comprehensive analysis of CD8(+)-T-cell responses against hepatitis C virus reveals multiple unpredicted specificities. *Journal of virology*, 76(12), 6104

**Georgios N Dalekos, Eirini Makri, Stephanie Loges, Petra Obermayer-Straub, Kalliopi Zachou, Thomas Tsirikas, Elenore Schmidt, Georgia Papadamou, Michael P Manns** (2002//). Increased incidence of anti-LKM autoantibodies in a consecutive cohort of hepatitis C patients from central Greece. *European journal of gastroenterology & hepatology*, 14(1), 35  
**Gert Hausdorf, Dirk Roggenbuck, Eugen Feist, Thomas Buttner, Peter R Jungblut, Karsten**

**Conrad, Christoph Berg, Reinhild Klein** (2009//). Autoantibodies to asialoglycoprotein receptor (ASGPR) measured by a novel ELISA-- revival of a disease-activity marker in autoimmune hepatitis. *Clinica chimica acta; international journal of clinical chemistry*, 408(1-2), 19

**Ghada F Helaly, Ebtisam F El Ghazzawi, Sherine M Shawky, Farag M Farag** (2015//). Occult hepatitis B virus infection among chronic hemodialysis patients in Alexandria, Egypt. *Journal of infection and public health*, 8(6), 562

**Ghada F Helaly, Nabila G Hussein, Wael Refai, Mervat Ibrahim** (2011//). Relation of serum insulin-like growth factor-1 (IGF-1) levels with hepatitis C virus infection and insulin resistance. *Translational research : the journal of laboratory and clinical medicine*, 158(3), 155

**Ghamdan Al-Tahish, Mohamed A El-Barrawy, Mona H Hashish, Zeinab Heddaya** (2013//). Effectiveness of three types of rapid tests for the detection of hepatitis C virus antibodies among blood donors in Alexandria, Egypt. *Journal of virological methods*, 189(2), 370

**Giambattista Ravera, Luigi Carlo Bottaro, Mauro Franceschini, Anna Morando, Monica De Polo, Mahmoud Zare, Carmen Giacomelli, Sabrina Zanardi** (2006//). Reliability and diagnostic use of a test for the search of the hepatitis C virus Ag (AgHCV). *Hepato-gastroenterology*, 53(71), 753

**Gilles Kaplanski, Thierry Maisonobe, Valerie Marin, Sandra Gres, Stephane Robitail, Catherine Farnarier, Jean-Robert Harle, Jean-Charles Piette, Patrice Cacoub** (2005//). Vascular cell adhesion molecule-1 (VCAM-1) plays a central role in the pathogenesis of severe forms of vasculitis due to hepatitis C-associated mixed cryoglobulinemia. *Journal of hepatology*, 42(3), 334

**Gillian C Harcourt, Sharyne Donfield, Edward Gomperts, Eric S Daar, Philip Jr Goulder, Rodney E Phillips, Paul Klenerman, Hemophilia Growth and Development Study (HGDS)** (2005//). Longitudinal analysis of CD8 T-cell responses to HIV and hepatitis C virus in a cohort of co-infected haemophiliacs. *AIDS (London, England)*, 19(11), 1135

**Giovanna A Moscato, Gianluigi Giannelli, Barbara Grandi, Daniela Pieri, Ombretta Marsi, Isabella Guarducci, Irene Batini, Emanuele Altomare, Salvatore Antonaci, Alfonso Capria, Giovanni Pellegrini, Rodolfo Sacco** (2011//). Quantitative determination of hepatitis C core antigen in therapy monitoring for chronic hepatitis C. *Intervirology*, 54(2), 61

**Gita Negi, Dushyant Singh Gaur** (2014//). Trends of transfusion transmissible diseases among blood donors at uttarakhand, India. *Indian journal of community medicine : official publication of Indian Association of Preventive & Social Medicine*, 39(3), 183

**Gregor Leckie, George Schneider, Klara Abravaya, Robert Hoenle, Julie Johanson, John Lampinen, Reuben Ofsaiof, Lisa Rundle, Shruti Shah, Andrea Frank, Dan Toolsie, Roy Vijesurier, Hong Wang, John Robinson** (2004//). Performance attributes of the LCx HCV RNA quantitative assay. *Journal of virological methods*, 115(2), 207

**Guilherme Albertoni, C P Arnoni, P R B Araujo, F O Carvalho, J A Barreto** (2010//). Signal to cut-off (S/CO) ratio and detection of HCV genotype 1 by real-time PCR one-step method: is there any direct relationship?. *The Brazilian journal of infectious diseases : an official publication of the Brazilian Society of Infectious Diseases*, 14(2), 147

**Guillaume Bach, Laure Perrin-Cocon, Estelle Gerossier, Aurelie Guironnet-Paquet, Vincent Lotteau, Genevieve Inchauspe, Anne Fournillier** (2010//). Single lysophosphatidylcholine components exhibit adjuvant activities in vitro and in vivo. *Clinical and vaccine immunology : CVI*, 17(3), 429

**Gustavo Ferrin, Manuel Rodriguez-Peralvarez, Patricia Aguilar-Melero, Isidora Ranchal, Camilo Llamaza, Clara I Linares, Sandra Gonzalez-Rubio, Jordi Muntane, Javier Briceno, Pedro Lopez-Cillero, Jose Luis Montero-Alvarez, Manuel de la Mata** (2015//). Plasma protein biomarkers of hepatocellular carcinoma in HCV-infected alcoholic patients with cirrhosis. *PLoS one*, 10(3), e0118527

**H Akkiz, S Colakoglu, F Koksall, H Korkut, A Hafta** (1996//). Hepatitis C virus genotypes in patients with hepatocellular carcinoma. *Journal of environmental pathology, toxicology and oncology : official organ of the International Society for Environmental Toxicology and Cancer*, 15(2-4), 85

**H Claeys, A Volckaerts, W Mertens, Z Liang, P Fiten, G Opendakker** (1995//). Localization and reactivity of an immunodominant domain in the NS3 region of hepatitis C virus. *Journal of medical virology*, 45(3), 273

**H De Beenhouwer, H Verhaert, H Claeys, C Vermeylen** (1992//). Confirmation of hepatitis C virus positive blood donors by immunoblotting and polymerase chain reaction. *Vox sanguinis*, 63(3), 198



**H E Ownby, J J Korelitz, M P Busch, A E Williams, SH Kleinman, R O Gilcher, P Nourjah** (1997//).

Loss of volunteer blood donors because of unconfirmed enzyme immunoassay screening results. *Retrovirus Epidemiology Donor Study. Transfusion*, 37(2), 199

**H H Feucht, B Zollner, M Schroter, S Polywka, P Buggisch, H Nolte, R Laufs** (1999//). High rate of chronicity in HCV infection determined by antibody confirmatory assay and PCR in 4110 patients during long-term follow-up. *Journal of clinical virology : the official publication of the Pan American Society for Clinical Virology*, 13(1-2), 43

**H H Feucht, B Zollner, R Laufs** (1995//). Comparison of conventional autoradiography with a new DNA enzyme immunoassay for the detection of hepatitis C virus-polymerase chain reaction amplification products. *Journal of virological methods*, 55(1), 105

**H H Hsu, M Donets, H B Greenberg, S M Feinstone** (1993//). Characterization of hepatitis C virus structural proteins with a recombinant baculovirus expression system. *Hepatology (Baltimore, Md.)*, 17(5), 763

**H H Hsu, T L Wright, D Luba, M Martin, S M Feinstone, G Garcia, H B Greenberg** (1991//). Failure to detect hepatitis C virus genome in human secretions with the polymerase chain reaction. *Hepatology (Baltimore, Md.)*, 14(5), 763

**H H Lin, H Y Hsu, M H Chang, K F Hong, Y C Young, T Y Lee, P J Chen, D S Chen** (1991//). Low prevalence of hepatitis C virus and infrequent perinatal or spouse infections in pregnant women in Taiwan. *Journal of medical virology*, 35(4), 237

**H I Atrah, M M Ahmed** (1996//). Hepatitis C virus seroconversion by a third generation ELISA screening test in blood donors. *Journal of clinical pathology*, 49(3), 254

**H Imai, Y Nakano, K Kiyosawa, E M Tan** (1993//). Increasing titers and changing specificities of antinuclear antibodies in patients with chronic liver disease who develop hepatocellular carcinoma. *Cancer*, 71(1), 26

**H J Alter, R Sanchez-Pescador, M S Urdea, J C Wilber, R J Lagier, A M Di Bisceglie, J W Shih, P D Neuwald** (1995//). Evaluation of branched DNA signal amplification for the detection of hepatitis C virus RNA. *Journal of viral hepatitis*, 2(3), 121

**H J Lin, T Tanwandee, F B Hollinger** (1997//). Improved methods for quantification of human immunodeficiency virus type 1 RNA and hepatitis C virus RNA in blood using spin column technology

and chemiluminescent assays of PCR products. *Journal of medical virology*, 51(1), 56

**H J Park, S M Byun, Y J Ha, J S Ahn, H M Moon** (1995//). Identification of immunodominant epitopes in the core and non-structural region of hepatitis C virus by enzyme immunoassay using synthetic peptides. *Journal of immunoassay*, 16(2), 167

**H Khorsi, T Salabi, S Castelain, O Jaillon, P Zawadzki, J P Capron, F Eb, C Wychowski, G Duverlie** (1998//). Amplification and detection of the terminal 3' non-coding region of hepatitis C virus isolates. *Research in virology*, 149(2), 115

**H L Tillmann, J Wiegand, I Glomb, A Jelineck, G Picchio, H Wedemeyer, M P Manns** (2005//). Diagnostic algorithm for chronic hepatitis C virus infection: role of the new HCV-core antigen assay. *Zeitschrift fur Gastroenterologie*, 43(1), 11

**H L Zaaijer, H T Cuypers, H W Reesink, P N Lelie** (1994//). Should the c100 antigen be removed from HCV antibody assays?. *Vox sanguinis*, 66(2), 150

**H L Zaaijer, H Vrieling, P J van Exel-Oehlers, H T Cuypers, P N Lelie** (1994//). Confirmation of hepatitis C infection: a comparison of five immunoblot assays. *Transfusion*, 34(7), 603

**H Lohr, C Nagel, H P Dienes, B Simpson, G Michel, B Goergen, K H Meyer zum Buschenfelde, G Gerken** (1994//). Significance of IgG and IgM HCV antibody secretion in vitro in patients with chronic hepatitis C: correlation with disease activity and response to interferon-alpha. *Hepatology (Baltimore, Md.)*, 20(6), 1383

**H M Cruz, V A Marques, C A Villela-Nogueira, K M R do O, L L Lewis-Ximenez, E Lampe, L M Villar** (2012//). An evaluation of different saliva collection methods for detection of antibodies against hepatitis C virus (anti-HCV). *Journal of oral pathology & medicine : official publication of the International Association of Oral Pathologists and the American Academy of Oral Pathology*, 41(10), 793

**H M Lee, J Naor, R Alhindi, T Chinfook, M Krajdien, T Mazzulli, D S Rootman** (2001//). Detection of hepatitis C virus in the corneas of seropositive donors. *Cornea*, 20(1), 37

**H Miyakawa, E Kikazawa, K Abe, K Kikuchi, H Fujikawa, M Matsushita, N Kawaguchi, T Morizane, K Ohya, M Kako** (1999//). Detection of anti-LKM-1(anti-CYP2D6) by an enzyme-linked immunosorbent assay in adult patients with chronic liver diseases. *Autoimmunity*, 30(2), 107

**H Ohnuma, T Tanaka, A Yoshikawa, H Murokawa, K Minegishi, R Yamanaka, H Y Lizuka, M Miyamoto, S Satoh, S Nakahira, T Tomono, T Murozuka, Y Takeda, Y Doi, H Mine, S Yokoyama, T Hirose, K Nishioka, Japanese Red Cross NAT Screening Research Group** (2001//).

The first large-scale nucleic acid amplification testing (NAT) of donated blood using multiplex reagent for simultaneous detection of HBV, HCV, and HIV-1 and significance of NAT for HBV. *Microbiology and immunology*, 45(9), 667

**H Okamoto, E Munekata, F Tsuda, K Takahashi, S Yotsumoto, T Tanaka, K Tachibana, Y Akahane, Y Sugai, Y Miyakawa** (1990//).

Enzyme-linked immunosorbent assay for antibodies against the capsid protein of hepatitis C virus with a synthetic oligopeptide. *The Japanese journal of experimental medicine*, 60(4), 223

**H P Kapprell, G Michel, H Hampl, F Bonino, J I Esteban** (1996//). Demonstration of specific detection of anti-HCV IgM core antibodies. *Journal of virological methods*, 59(1-2), 121

**H S Lee, C J Han, C Y Kim** (1993//). Predominant etiologic association of hepatitis C virus with hepatocellular carcinoma compared with hepatitis B virus in elderly patients in a hepatitis B-endemic area. *Cancer*, 72(9), 2564

**H Sakugawa, H Nakasone, T Nakayoshi, F Kinjo, A Saito, S Yakabi, H Zukeran, Y Miyagi, R Taira, K Koja** (1995//). High proportion of false positive reactions among donors with anti-HCV antibodies in a low prevalence area. *Journal of medical virology*, 46(4), 334

**H T Chung, J S Lee, A S Lok** (1993//). Prevention of posttransfusion hepatitis B and C by screening for antibody to hepatitis C virus and antibody to HBcAg. *Hepatology (Baltimore, Md.)*, 18(5), 1045

**H W Reesink, D Bresters, C L van der Poel, H T Cuypers, P N Lelie** (1992//). New developments in hepatitis C. *Scandinavian journal of gastroenterology. Supplement*, 194(#issue#), 82

**H Yatsushashi, O Inoue, M Koga, S Nagataki, K Mizuno, J Kolberg, E Beall, T A Cha, B Irvine, G Kuo** (1992//). Comparison of hepatitis C virus markers in patients with NANB hepatitis. *Journal of virological methods*, 37(1), 13

**Hadir Ahmed El-Mahallawy, Nahla Bahgat, Hanaa Mahmoud Alam El-Din, Samah A Farag, Akram Nouh, Inas El-Attar** (2004//). Hepatitis C virus and its genotypes and *Helicobacter pylori* in pediatric non-Hodgkin's lymphoma: could there be a possible etiologic role?. *Journal of the Egyptian*

*National Cancer Institute*, 16(2), 114

**Haiying Liu, Gary L Norman, Zakera Shums, Howard J Worman, Edward L Krawitt, Nicola Bizzaro, Diego Vergani, Dimitrios P Bogdanos, George N Dalekos, Piotr Milkiewicz, Albert J Czaja, E Jenny Heathcote, Gideon M Hirschfield, Eng M Tan, Kiyomitsu Miyachi, Monica Bignotto, Pier Maria Battezzati, Ana Lleo, Patrick S Leung, Mauro Podda, M Eric Gershwin, Pietro Invernizzi** (2010//). PBC screen: an IgG/IgA dual isotype ELISA detecting multiple mitochondrial and nuclear autoantibodies specific for primary biliary cirrhosis. *Journal of autoimmunity*, 35(4), 436

**Hamish Mohammed, Jeffrey M Linnen, Jorge L Munoz-Jordan, Kay Tomashek, Gregory Foster, Amy S Broulik, Lyle Petersen, Susan L Stramer** (2008//). Dengue virus in blood donations, Puerto Rico, 2005. *Transfusion*, 48(7), 1348

**Hans Orlent, Isabelle Desombere, Bettina Hansen, Hans Van Vlierberghe, Bart Haagmans, Robert J De Knegt, Solko W Schalm, Geert Leroux-Roels, Harry L A Janssen, DITTO-HCV Study Group** (2010//). Baseline anti-NS4a antibodies in combination with on-treatment quantitative HCV-RNA reliably identifies nonresponders to pegylated interferon-ribavirin combination therapy after 4 weeks of treatment. *European journal of gastroenterology & hepatology*, 22(12), 1443

**Hatem A El-mezayen, Hossam Darwish** (2014//). Development of a novel score for early detection of hepatocellular carcinoma among high-risk hepatitis C virus patients. *Tumour biology : the journal of the International Society for Oncodevelopmental Biology and Medicine*, 35(7), 6501

**Hayley A Croom, Kim M Richards, Susan J Best, Barbara H Francis, Elizabeth I M Johnson, Elizabeth M Dax, Kim M Wilson** (2006//). Commercial enzyme immunoassay adapted for the detection of antibodies to hepatitis C virus in dried blood spots. *Journal of clinical virology : the official publication of the Pan American Society for Clinical Virology*, 36(1), 68

**Heike Bantel, Andreas Luger, Jan Heidemann, Xandra Volkmann, Christopher Poremba, Christian P Strassburg, Michael Peter Manns, Klaus Schulze-Osthoff** (2004//). Detection of apoptotic caspase activation in sera from patients with chronic HCV infection is associated with fibrotic liver injury. *Hepatology (Baltimore, Md.)*, 40(5), 1078

**Helena Medina Cruz, Leticia de Paula Scalioni, Vanessa Salette de Paula, Elisangela Ferreira da Silva, Kycia Maria Rodrigues do O, Flavio**

1  
2  
3  
4  
5  
6  
7  
8  
9  
10  
11  
12  
13  
14  
15  
16  
17  
18  
19  
20  
21  
22  
23  
24  
25  
26  
27  
28  
29  
30  
31  
32  
33  
34  
35  
36  
37  
38  
39  
40  
41  
42  
43  
44  
45  
46  
47  
48  
49  
50  
51  
52  
53  
54  
55  
56  
57  
58  
59  
60

**Augusto Padua Milagres, Marcelo Santos Cruz, Francisco Inacio Bastos, Priscila Pollo-Flores, Erotildes Leal, Ana Rita Coimbra Motta-Castro, Jose Henrique Pilotto, Lia Laura Lewis-Ximenez, Elisabeth Lampe, Livia Melo Villar** (2015//). Evaluating HBsAg rapid test performance for different biological samples from low and high infection rate settings & populations. *BMC infectious diseases*, 15(issue#), 548

**Hesam Ahmadi Nooredinvand, David W Connell, Mahmoud Asgheddi, Mohammed Abdullah, Marie O'Donoghue, Louise Campbell, Melissa I Wickremasinghe, Ajit Lalvani, Onn Min Kon, Shahid A Khan** (2015//). Viral hepatitis prevalence in patients with active and latent tuberculosis. *World journal of gastroenterology*, 21(29), 8920

**Hie-Won L Hann, Jungmin Lee, Anne Bussard, Catherine Liu, Yongri R Jin, Koel Guha, Marcia M Clayton, Kristin Ardlie, Michael J Pellini, Mark A Feitelson** (2004//). Preneoplastic markers of hepatitis B virus-associated hepatocellular carcinoma. *Cancer research*, 64(20), 7329

**Hiroshi Miyakawa, Yumi Kawashima, Eriko Kitazawa, Naomi Kawaguchi, Takashi Kato, Kentaro Kikuchi, Erika Imai, Hirotohi Fujikawa, Etsuko Hashimoto, Wolfgang Schlumberger** (2003//). Low frequency of anti-SLA/LP autoantibody in Japanese adult patients with autoimmune liver diseases: analysis with recombinant antigen assay. *Journal of autoimmunity*, 21(1), 77

**Hitoshi Togashi, Chika Hashimoto, Junji Yokozawa, Akihiko Suzuki, Kazuhiko Sugahara, Takafumi Saito, Ichiro Yamaguchi, Hala Badawi, Norikazu Kainuma, Masaaki Aoyama, Hiroaki Ohya, Takao Akatsuka, Yasuhito Tanaka, Masashi Mizokami, Sumio Kawata** (2008//). What can be revealed by extending the sensitivity of HBsAg detection to below the present limit?. *Journal of hepatology*, 49(1), 17

**Hongbo Shi, Li Xie, Honglin Shi, Li Yan, Zhongping Duan** (2012//). Characterization and application of monoclonal antibody against hepatitis C virus nonstructural protein three. *Hybridoma* (2005), 31(1), 54

**Hubert Darius J Daniel, Priya Abraham, Sukanya Raghuraman, Perumal Vivekanandan, Thenmozhi Subramaniam, Gopalan Sridharan** (2005//). Evaluation of a rapid assay as an alternative to conventional enzyme immunoassays for detection of hepatitis C virus-specific antibodies. *Journal of clinical microbiology*, 43(4), 1977

**Hui-Chun Li, Shih-Yen Lo** (2015//). Hepatitis C virus: Virology, diagnosis and treatment. *World journal of hepatology*, 7(10), 1377

**Hadziyannis E., Minopetrou M., Georgiou A., Spanou F., Koskinas J.** (2013//). Is HCV core antigen a reliable marker of viral load? An evaluation of HCV core antigen automated immunoassay *Annals of Gastroenterology*, 26(2), 146

**Hafeez-ud-din, Siddiqui T.S., Lahrasab W., Sharif M.A.** (2012//). Prevalence of hepatitis B and C in healthy adult males of paramilitary personnel in Punjab *Journal of Ayub Medical College, Abbottabad : JAMC*, 24(3-4), 138

**Han X., Aho M., Vene S., Peltomaa M., Vaheri A., Vapalahti O.** (2001//). Evaluation of hepatitis C antibody testing in saliva specimens collected by two different systems in comparison with HCV antibody and HCV RNA in serum *Journal of Medical Virology*, 64(1), 13

**Hanafiah K.M., Garcia M., Anderson D.** (2013//). Point-of-care testing and the control of infectious diseases *Biomarkers in Medicine*, 7(3), 333

**Harbron S.** (1995//). Recombinant antigens in immunoassay *Expert Opinion on Investigational Drugs*, 4(3), 189

**He L., Zang A., Du M., Ma D., Yuan C., Zhou C., Mu J., Shi H., Li D., Huang X., Deng Q., Xiao J., Yan H., Hui L., Lan K., Xiong S., Li X., Huang Z., Xiao H.** (2015//). mTOR regulates TLR-induced c-fos and Th1 responses to HBV and HCV vaccines *Virologica Sinica*, 30(3), 174

**Health Quality Ontario** (2006//). Optimum methadone compliance testing: an evidence-based analysis. *Ontario health technology assessment series*, 6(21), 1

**Heck E., Brown A., Cavanagh H.D.** (2013//). Nucleic acid testing and tissue safety: An eye banks five-year review of hiv and hepatitis testing for donor corneas *Cornea*, 32(4), 503

**Heiat M., Ranjbar R., Alavian S.M.** (2014//). Classical and modern approaches used for viral hepatitis diagnosis *Hepatitis Monthly*, 14(4), no pagination

**Heintges T., Mohr L., Niederau C., Scheiffler F., Hensel F., Haussinger D.** (1998//). Quantitative hepatitis C RNA-polymerase chain reaction and detection with DNA-ELISA *Hepato-Gastroenterology*, 45(23), 1684

**Helaly G.F., Abou Shamaa L.A.** (2006//). Influence

of hepatitis C virus infection on circulating levels of sICAM-1 and VEGF in patients with hepatitis C and hepatocellular carcinoma (HCC) and their role in enhancing detection of HCC *The Egyptian journal of immunology / Egyptian Association of Immunologists*, 13(1), 27

**Henrard D.R.,Berthillon P.,Scheffel J.W.,Ladaique P.L.,Moore B.S.,Pailhous M.C.,Finetti P.H.,Trepo C.** (1998//). Lack of evidence of hepatitis C infection in 290 blood component recipients, demonstrated by several single-antigen research immunoassays *Transfusion*, 38(2), 194

**Herremans M.,Bakker J.,Duizer E.,Vennema H.,Koopmans M.P.G.** (2007//). Use of serological assays for diagnosis of hepatitis e virus genotype 1 and 3 infections in a setting of low endemicity *Clinical and Vaccine Immunology*, 14(5), 562

**Hodgetts A.,Levin M.,Kroll J.S.,Langford P.R.** (2007//). Biomarker discovery in infectious diseases using SELDI *Future Microbiology*, 2(1), 35

**Hofmann H.** (1996//). Comparison of four newly developed immunoblot assays with RIBA II for detection of HCV antibodies *Serodiagnosis and Immunotherapy in Infectious Disease*, 8(2), 79

**Hotta H.,Kemapunmanus M.,Apichartpiyakul C.,Soetjpto,Handajani R.,Barzaga N.G.** (1997//). Differential distribution of hepatitis C virus subtypes in Asia: comparative study among Thailand, Indonesia, the Philippines and Japan *The Southeast Asian journal of tropical medicine and public health*, 28 Suppl 3(#issue#), 23

**Huo T.I.,Wu J.C.,Yen F.S.,Sheen I.J.,Lee S.D.** (1996//). Polymerase chain reaction analysis for viral nucleic acids in acute sporadic hepatitis patients negative for serum hepatitis B surface antigen and antibodies to hepatitis C virus *Zhonghua yi xue za zhi = Chinese medical journal; Free China ed*, 58(6), 379

**Hyder O.,Ijaz M.,Arshad M.A.,Zahira T.** (2010//). Age-specific frequency of screen-detected hepatitis C virus seropositivity in men from the Punjab province of Pakistan *Journal of medical screening*, 17(4), 214

**Ichimura H.,Tamura I.,Yamada O.,Takezaki E.,Koda T.,Kurimura O.,Kurimura T.** (1992//). Hepatitis C virus RNA and hepatitis C virus antibody in the serum of patients with abnormal liver function *Journal of Infection*, 25(SUPPL. 1), 47

**Idrees M.** (2001//). Comparison of two typing systems for genotyping of hepatitis C virus isolates *Journal of the College of Physicians and Surgeons*

*Pakistan*, 11(11), 679

**Ilyas M.,Ahmad I.** (2014//). Chemiluminescent microparticle immunoassay based detection and prevalence of HCV infection in district Peshawar Pakistan *Virology journal*, 11(#issue#), 127

**Isahak I.,Baharin R.,Hakim A.S.,Abu Bakar M.,George E.** (1993//). Antibody to hepatitis C virus in thalassemia patients *The Malaysian journal of pathology*, 15(1), 85

**I G Bondarenko, P E Garrett, I N Savinova, Y A Sedunova** (1999//). Lack of correlation between sensitivity characteristics of the tests for hepatitis C virus antibodies estimated with serially diluted and natural low-reactive control specimens. *Scandinavian journal of clinical and laboratory investigation*, 59(2), 153

**I M Zitron, M Laurinaitis, L Qu, A L Silverman, S C Gordon** (2000//). Immunological responses in patients who have spontaneously eradicated hepatitis C virus infection. *Viral immunology*, 13(4), 521

**I Srugo, E Shinar, S Bar-Shany, L Amos** (1998//). Hepatitis B and C markers among alcoholics in Israel: high incidence of HCV infection. *European journal of epidemiology*, 14(4), 333

**I Stefanidis, E K Zervou, C Rizos, C Syrganis, E Patsidis, G Kyriakopoulos, L Sdrakas, N Tsianias, E I Rigopoulou, V Liakopoulos, G N Dalekos** (2004//). Hepatitis E virus antibodies in hemodialysis patients: an epidemiological survey in central Greece. *The International journal of artificial organs*, 27(10), 842

**Idania Gonzalez-Perez, Yaime Josefina Gonzalez Gonzalez, Ariel Vina-Rodriguez, Anny Armas Cayarga, Rosa Lydia Solis** (2004//). The usefulness of Umelosa hepatitis C virus qualitative kit as supplemental test for confirmation of hepatitis C virus infection. *Revista da Sociedade Brasileira de Medicina Tropical*, 37(1), 25

**Iman Gouda, Ola Nada, Sameera Ezzat, Mai Eldaly, Christopher Loffredo, Clive Taylor, Mohamed Abdel-Hamid** (2010//). Immunohistochemical detection of hepatitis C virus (genotype 4) in B-cell NHL in an Egyptian population: correlation with serum HCV-RNA. *Applied immunohistochemistry & molecular morphology : AIMM / official publication of the Society for Applied Immunohistochemistry*, 18(1), 29

**Inmaculada Castillo, Javier Bartolome, Juan Antonio Quiroga, Guillermina Barril, Vicente Carreno** (2010//). Diagnosis of occult hepatitis C



without the need for a liver biopsy. *Journal of medical virology*, 82(9), 1554

**Isabel Zvibel, Phillipe Halfon, Sigal Fishman, Guillaume Penaranda, Moshe Leshno, Anat Bet Or, Zamir Halpern, Ran Oren** (2009//). Syndecan 1 (CD138) serum levels: a novel biomarker in predicting liver fibrosis stage in patients with hepatitis C. *Liver international : official journal of the International Association for the Study of the Liver*, 29(2), 208

**Izumi Okura, Norio Horiike, Kojiro Michitaka, Morikazu Onji** (2004//). Effect of mutation in the hepatitis C virus nonstructural 5B region on HCV replication. *Journal of gastroenterology*, 39(5), 449

**J A Neville, L E Prescott, V Bhattacharjee, N Adams, I Pike, B Rodgers, A El-Zayadi, S Hamid, G M Dusheiko, A A Saeed, G H Haydon, P Simmonds** (1997//). Antigenic variation of core, NS3, and NS5 proteins among genotypes of hepatitis C virus. *Journal of clinical microbiology*, 35(12), 3062

**J A Oliva, G Ercilla, J M Mallafre, M Bruguera, J Carrio, B J Pereira** (1995//). Markers of hepatitis C infection among hemodialysis patients with acute and chronic infection: implications for infection control strategies in hemodialysis units. *The International journal of artificial organs*, 18(2), 73

**J A Quiroga, J Martin, M Pernas, M Pardo, M Herrero, I Castillo, J Bartolome, V Carreno** (1994//). Evidence of subtype-specific antibodies to antigenic epitopes in the NS5 region of hepatitis C virus in the circulation of patients with chronic hepatitis C. *Clinical and diagnostic laboratory immunology*, 1(5), 545

**J A Quiroga, M L Campillo, I Catillo, J Bartolome, J C Porres, V Carreno** (1991//). IgM antibody to hepatitis C virus in acute and chronic hepatitis C. *Hepatology (Baltimore, Md.)*, 14(1), 38

**J Abb** (1991//). Prevalence of hepatitis C virus antibodies in hospital personnel. *Zentralblatt fur Bakteriologie : international journal of medical microbiology*, 274(4), 543

**J al-Wakeel, G H Malik, S al-Mohaya, A Mitwalli, F Baroudi, H el Gamal, M Kechrid** (1996//). Liver disease in dialysis patients with antibodies to hepatitis C virus. *Nephrology, dialysis, transplantation : official publication of the European Dialysis and Transplant Association - European Renal Association*, 11(11), 2265

**J Andreu, M A Abad, A Sanchez-Quijano, R Torronteras, F Luque, J Garcia de las Heras, B Soto, J A Pineda, M Leal, E Lissen** (1994//). High

rate of nonspecific anti-hepatitis C reactivity amongst homosexual men in comparison with that found in other sexually active groups and blood donors. *Viral Hepatitis and AIDS Study Group. Journal of internal medicine*, 236(1), 73

**J Benitez, D Palenzuela, J Rivero, J V Gavilondo** (1998//). A recombinant protein based immunoassay for the combined detection of antibodies to HIV-1, HIV-2 and HTLV-I. *Journal of virological methods*, 70(1), 85

**J Birguel, J G Ndong, S Akhavan, G Moreau, J J Sobnangou, C Aurenche, F Lunel, V Thibault, J M Huraux** (2011//). [Viral markers of hepatitis B, C and D and HB vaccination status of a health care team in a rural district of Cameroon]. *Medecine tropicale : revue du Corps de sante coloniale*, 71(2), 201

**J Brown, S Dourakis, P Karayiannis, R Goldin, J Chiba, H Ohba, T Miyamura, H C Thomas** (1992//). Seroprevalence of hepatitis C virus nucleocapsid antibodies in patients with cryptogenic chronic liver disease. *Hepatology (Baltimore, Md.)*, 15(2), 175

**J Bukh, P Wantzin, K Krosggaard, F Knudsen, R H Purcell, R H Miller** (1993//). High prevalence of hepatitis C virus (HCV) RNA in dialysis patients: failure of commercially available antibody tests to identify a significant number of patients with HCV infection. *Copenhagen Dialysis HCV Study Group. The Journal of infectious diseases*, 168(6), 1343

**J Bukh, R H Miller, M C Kew, R H Purcell** (1993//). Hepatitis C virus RNA in southern African blacks with hepatocellular carcinoma. *Proceedings of the National Academy of Sciences of the United States of America*, 90(5), 1848

**J C Bode, D M Alscher, H Wisser, C Bode** (1995//). Detection of hepatitis C virus antibodies and hepatitis C virus RNA in patients with alcoholic liver disease. *Alcohol and alcoholism (Oxford, Oxfordshire)*, 30(1), 97

**J C Chang, C Seidel, B Ofenloch, D L Jue, H A Fields, Y E Khudyakov** (1999//). Antigenic heterogeneity of the hepatitis C virus NS4 protein as modeled with synthetic peptides. *Virology*, 257(1), 177

**J C Hierholzer, P E Halonen, P G Bingham, R A Coombs, Y O Stone** (1994//). Antigen detection in human respiratory Coronavirus infections by monoclonal time-resolved fluoroimmunoassay. *Clinical and diagnostic virology*, 2(3), 165

**J C Ryff** (1997//). Clinical investigation of the immunogenicity of interferon-alpha 2a. *Journal of interferon & cytokine research : the official journal of*

the International Society for Interferon and Cytokine Research, 17 Suppl 1(#issue#), S29

**J C Sheu, S H Lee, J T Wang, L N Shih, T H Wang, D S Chen** (1992//). Prevalence of anti-HCV and HCV viremia in hemodialysis patients in Taiwan. *Journal of medical virology*, 37(2), 108

**J Cosserat, P Cacoub, O Bletry** (1996//). Immunological disorders in C virus chronic hepatitis. *Nephrology, dialysis, transplantation : official publication of the European Dialysis and Transplant Association - European Renal Association*, 11 Suppl 4(#issue#), 31

**J E Gao, Q M Tao, J P Guo, H P Ji, Z W Lang, Y Ji, B F Feng** (1997//). Preparation and application of monoclonal antibodies against hepatitis C virus nonstructural proteins. *World journal of gastroenterology*, 3(2), 114

**J Encke, J Findekle, J Geib, E Pfaff, W Stremmel** (2005//). Prophylactic and therapeutic vaccination with dendritic cells against hepatitis C virus infection. *Clinical and experimental immunology*, 142(2), 362

**J F Jusot, C Colin** (2001//). Cost-effectiveness analysis of strategies for hepatitis C screening in French blood recipients. *European journal of public health*, 11(4), 373

**J F Quaranta, S R Delaney, S Alleman, J P Cassuto, P Dellamonica, J P Allain** (1994//). Prevalence of antibody to hepatitis C virus (HCV) in HIV-1-infected patients (nice SEROCO cohort). *Journal of medical virology*, 42(1), 29

**J F Zmuda, B Wagoneer, L Liotta, G Whiteley** (2001//). Recognition of multiple classes of hepatitis C antibodies increases detection sensitivity in oral fluid. *Clinical and diagnostic laboratory immunology*, 8(6), 1267

**J H Kao, H H Lin, P J Chen, M Y Lai, T H Wang, M Mizokami, D S Chen** (1996//). Serotyping of hepatitis C virus in chronic type C hepatitis in Taiwan: correlation with genotypes. *Journal of gastroenterology*, 31(2), 224

**J H Lee, W K Roth, S Zeuzem** (1997//). Evaluation and comparison of different hepatitis C virus genotyping and serotyping assays. *Journal of hepatology*, 26(5), 1001

**J Hayashi, K Nakashima, M Hirata, A Noguchi, K Akazawa, Y Maeda, S Kashiwagi** (1992//). Hepatitis C virus detection is facilitated by the combined use of c100 protein and GOR epitope. *Gastroenterologia Japonica*, 27(5), 632

**J Hayashi, K Nakashima, Y Kishihara, M Ohmiya, E Yoshimura, M Hirata, S Kashiwagi** (1993//). Improved detection of antibodies to hepatitis C virus by the second-generation assay in patients with chronic non-A, non-B liver disease. *The Journal of infection*, 26(3), 287

**J Hilfenhaus, U Krupka, T Nowak, L B Cummins, K Fuchs, M Roggendorf** (1992//). Follow-up of hepatitis C virus infection in chimpanzees: determination of viraemia and specific humoral immune response. *The Journal of general virology*, 73 ( Pt 4)(#issue#), 1015

**J I Esteban, A Gonzalez, J M Hernandez, L Viladomiu, C Sanchez, J C Lopez-Talavera, D Lucea, C Martin-Vega, X Vidal, R Esteban** (1990//). Evaluation of antibodies to hepatitis C virus in a study of transfusion-associated hepatitis. *The New England journal of medicine*, 323(16), 1107

**J I Riezu-Boj, D Parker, M P Civeira, D Phippard, T P Corbishley, J Camps, A Castilla, J Prieto** (1992//). Detection of hepatitis C virus antibodies with new recombinant antigens: assessment in chronic liver diseases. *Journal of hepatology*, 15(3), 309

**J J Poterucha, J Rakela, L Lumeng, C H Lee, H F Taswell, R H Wiesner** (1992//). Diagnosis of chronic hepatitis C after liver transplantation by the detection of viral sequences with polymerase chain reaction. *Hepatology (Baltimore, Md.)*, 15(1), 42

**J L Bosmans, E J Nouwen, G Behets, K Gorteman, S O Huraib, F A Shaheen, G Maertens, G A Verpooten, M M Elseviers, M E de Broe** (1997//). Prevalence and clinical expression of HCV-genotypes in haemodialysis-patients of two geographically remote countries: Belgium and Saudi-Arabia. *Clinical nephrology*, 47(4), 256

**J Larsen, K Skaug, A Maeland** (1992//). Second-generation anti-HCV tests predict infectivity. *Vox sanguinis*, 63(1), 39

**J Liu, L Zhu, X Zhang, M Lu, Y Kong, Y Wang, G Li** (2001//). Expression, purification, immunological characterization and application of Escherichia coli-derived hepatitis C virus E2 proteins. *Biotechnology and applied biochemistry*, 34(Pt 2), 109

**J M Barrera, B Francis, G Ercilla, M Nelles, D Achord, J Darner, S R Lee** (1995//). Improved detection of anti-HCV in post-transfusion hepatitis by a third-generation ELISA. *Vox sanguinis*, 68(1), 15



- 1  
2  
3  
4  
5  
6  
7  
8  
9  
10  
11  
12  
13  
14  
15  
16  
17  
18  
19  
20  
21  
22  
23  
24  
25  
26  
27  
28  
29  
30  
31  
32  
33  
34  
35  
36  
37  
38  
39  
40  
41  
42  
43  
44  
45  
46  
47  
48  
49  
50  
51  
52  
53  
54  
55  
56  
57  
58  
59  
60
- J M Barrera, M Bruguera, M G Ercilla, J M Sanchez-Tapias, M P Gil, J Costa, A Gelabert, J Rodes, R Castillo** (1991//). Incidence of non-A, non-B hepatitis after screening blood donors for antibodies to hepatitis C virus and surrogate markers. *Annals of internal medicine*, 115(8), 596
- J M Pawlowsky** (1999//). Diagnostic tests for hepatitis C. *Journal of hepatology*, 31 Suppl 1(#issue#), 71
- J M Pawlowsky, J Remire, F Darthuy, L Intrator, L Udin, D Dhumeaux, J Duval** (1995//). Is the detection of anti-hepatitis C virus core IgM influenced by the presence of serum rheumatoid factor?. *Journal of medical virology*, 45(1), 68
- J M Pawlowsky, L Prescott, P Simmonds, C Pellet, P Laurent-Puig, C Labonne, F Darthuy, J Remire, J Duval, C Buffet, J P Etienne, D Dhumeaux, E Dussaix** (1997//). Serological determination of hepatitis C virus genotype: comparison with a standardized genotyping assay. *Journal of clinical microbiology*, 35(7), 1734
- J M Sanchez-Tapias, J M Barrera, J Costa, M G Ercilla, A Pares, L Comalrena, F Soley, J Bruix, X Calvet, M P Gil** (1990//). Hepatitis C virus infection in patients with nonalcoholic chronic liver disease. *Annals of internal medicine*, 112(12), 921
- J P Allain** (2000//). Genomic screening for blood-borne viruses in transfusion settings. *Clinical and laboratory haematology*, 22(1), 1
- J P Horcajada, M Garcia-Bengoechea, G Cilla, P Etzaniz, E Cuadrado, J I Arenas** (1999//). Mixed cryoglobulinaemia in patients with chronic hepatitis C infection: prevalence, significance and relationship with different viral genotypes. *Annals of medicine*, 31(5), 352
- J P Watson, A M Brind, C E Chapman, C L Bates, F K Gould, S J Johnson, A D Burt, J Ferguson, P Simmonds, M F Bassendine** (1996//). Hepatitis C virus: epidemiology and genotypes in the north east of England. *Gut*, 38(2), 269
- J Peterson, G Green, K Iida, B Caldwell, P Kerrison, S Bernich, K Aoyagi, S R Lee** (2000//). Detection of hepatitis C core antigen in the antibody negative 'window' phase of hepatitis C infection. *Vox sanguinis*, 78(2), 80
- J Pillot, M Rioche, Y Lazizi** (1994//). ELISA in serodiagnosis of HCV infection. *FEMS microbiology reviews*, 14(3), 221
- J Raedle, G Oremek, W K Roth, W F Caspary, S Zeuzem** (1997//). Anti-p53 autoantibodies in hepatitis C virus-infected patients. *Anticancer research*, 17(4B), 3079
- J Raedle, W K Roth, G Oremek, W F Caspary, S Zeuzem** (1995//). Alpha-fetoprotein and p53 autoantibodies in patients with chronic hepatitis C. *Digestive diseases and sciences*, 40(12), 2587
- J Shimazaki, K Tsubota, M Sawa, S Kinoshita, T Ohkura, M Honda** (1994//). Detection of human immunodeficiency virus, hepatitis B virus, and hepatitis C virus in donor eyes using polymerase chain reaction. *The British journal of ophthalmology*, 78(11), 859
- J Watanabe, C Matsumoto, K Fujimura, T Shimada, H Yoshizawa, H Okamoto, H Iizuka, T Tango, H Ikeda, N Endo** (1993//). Predictive value of screening tests for persistent hepatitis C virus infection evidenced by viraemia. Japanese experience. *Vox sanguinis*, 65(3), 199
- J Y Lai, J S Tam, L Y Lam, N W Leung** (1992//). Prevalence of antibody to hepatitis C virus in HBsAg-negative chronic liver disease in Hong Kong using different assays. *Journal of medical virology*, 37(2), 158
- Jacqueline K Flynn, Gregory J Dore, Gail Matthews, Margaret Hellard, Barbara Yeung, William D Rawlinson, Peter A White, John M Kaldor, Andrew R Lloyd, Rosemary A Ffrench,ATAHC Study Group** (2012//). Impaired hepatitis C virus (HCV)-specific interferon-gamma responses in individuals with HIV who acquire HCV infection: correlation with CD4(+) T-cell counts. *The Journal of infectious diseases*, 206(10), 1568
- James J Goedert, Manhattan Charurat, William A Blattner, Ronald C Hershov, Jane Pitt, Clemente Diaz, Lynne M Mofenson, Karen Green, Howard Minkoff, Mary E Paul, David L Thomas, Denise Whitby,Women and Infants Transmission Study** (2003//). Risk factors for Kaposi's sarcoma-associated herpesvirus infection among HIV-1-infected pregnant women in the USA. *AIDS (London, England)*, 17(3), 425
- Janak Kishore, Manisha Srivastava, Nabajyoti Choudhury** (2011//). Serological study on parvovirus B19 infection in multitransfused thalassemia major patients and its transmission through donor units. *Asian journal of transfusion science*, 5(2), 140
- Jean Summerton, Melissa Riedesel, Oliver Laeyendecker, Charlotte Gaydos, Nancy E Maldeis, Andrew Hardick, Rhoda Ashley Morrow, Thomas C Quinn** (2007//). Effect of sexually transmitted disease (STD) coinfections on performance of three commercially available immunosorbent assays used for detection of herpes simplex virus type 2-specific antibody in men

attending Baltimore, Maryland, STD clinics. *Clinical and vaccine immunology : CVI*, 14(12), 1545

**Jean-Michel Pawlotsky** (2003//). Use and interpretation of hepatitis C virus diagnostic assays. *Clinics in liver disease*, 7(1), 127

**Jean-Michel Pawlotsky** (2002//). Use and interpretation of virological tests for hepatitis C. *Hepatology (Baltimore, Md.)*, 36(5 Suppl 1), S65

**Jean-Pierre Allain, Helen Lee** (2005//). Rapid tests for detection of viral markers in blood transfusion. *Expert review of molecular diagnostics*, 5(1), 31

**Jeffrey J Post, Yong Pan, Anthony J Freeman, Charles E Harvey, Peter A White, Patricia Palladinetti, Paul S Haber, George Marinou, Michael H Levy, John M Kaldor, Kate A Dolan, Rosemary A French, Andrew R Lloyd, William D Rawlinson, Hepatitis C Incidence and Transmission in Prisons Study (HITS) Group** (2004//). Clearance of hepatitis C viremia associated with cellular immunity in the absence of seroconversion in the hepatitis C incidence and transmission in prisons study cohort. *The Journal of infectious diseases*, 189(10), 1846

**Jia-Yu Chen, Fan Li** (2006//). Development of hepatitis C virus vaccine using hepatitis B core antigen as immuno-carrier. *World journal of gastroenterology*, 12(48), 7774

**Jian-Wu Yu, Gui-Qiang Wang, Li-Jie Sun, Xiao-Guang Li, Shu-Chen Li** (2007//). Predictive value of rapid virological response and early virological response on sustained virological response in HCV patients treated with pegylated interferon alpha-2a and ribavirin. *Journal of gastroenterology and hepatology*, 22(6), 832

**Jie Cao, Qiuli Chen, Huaqun Zhang, Peipei Qi, Chao Liu, Xufang Yang, Niansong Wang, Baohua Qian, Jinhong Wang, Shaohua Jiang, Hua Yang, Shuhan Sun, Wei Pan** (2011//). Novel evolved immunoglobulin (Ig)-binding molecules enhance the detection of IgM against hepatitis C virus. *PLoS one*, 6(4), e18477

**Jie Liu, Wenhua Yu, Shuye Liu** (2013//). Positive ratio of specific antibodies to F protein in serum samples from chronic HCV-infected patients using an enzyme-linked immunosorbent assay: systematic review and meta-analysis. *European journal of gastroenterology & hepatology*, 25(10), 1152

**Jillian Kallman, Mary Margaret O'Neil, Brett Larive, Navdeep Boparai, Leonard Calabrese, Zobair M Younossi** (2007//). Fatigue and health-

related quality of life (HRQL) in chronic hepatitis C virus infection. *Digestive diseases and sciences*, 52(10), 2531

**Jing He, Bingshui Xiu, Guohua Wang, Kun Chen, Xiaoyan Feng, Xiaoguo Song, Cuixia Zhu, Shigan Ling, Heqiu Zhang** (2011//). Double-antigen sandwich ELISA for the detection of anti-hepatitis C virus antibodies. *Journal of virological methods*, 171(1), 163

**Jing Liu, Yi Huang, Jingxing Wang, Nan Guo, Julin Li, Xiangdong Dong, Hongli Ma, Meiheili Tiemuer, Mei Huang, David J Wright, Paul Ness, Hua Shan, International Component NHLBI Retrovirus Epidemiology Donor Study-II (REDS-II)** (2012//). The increasing prevalence of serologic markers for syphilis among Chinese blood donors in 2008 through 2010 during a syphilis epidemic. *Transfusion*, 52(8), 1741

**Jiro Ikoma, Masahiko Kaito, Tomoaki Ishihara, Naoki Nakagawa, Akira Kamei, Naoki Fujita, Motoh Iwasa, Shigenori Tamaki, Shozo Watanabe, Yukihiko Adachi** (2002//). Early diagnosis of hepatocellular carcinoma using a sensitive assay for serum des-gamma-carboxy prothrombin: a prospective study. *Hepato-gastroenterology*, 49(43), 235

**Jo-Il Kim, Adela Bordeanu, Jae-Chul Pyun** (2009//). Diamond-like carbon (DLC) microelectrode for electrochemical ELISA. *Biosensors & bioelectronics*, 24(5), 1394

**Johannes Wiegand, Markus Cornberg, Nuray Aslan, Verena Schlaphoff, Christoph Sarrazin, Anne Kubitschke, Peter Buggisch, Ayse Ciner, Elmar Jaeckel, Michael P Manns, Heiner Wedemeyer** (2007//). Fate and function of hepatitis-C-virus-specific T-cells during peginterferon-alpha2b therapy for acute hepatitis C. *Antiviral therapy*, 12(3), 303

**Joop E Arends, Mark A A Claassen, Charlotte H S B van den Berg, Nening M Nanlohy, Karel J van Erpecum, Bert C Baak, Andy I M Hoepelman, Andre Boonstra, Debbie van Baarle** (2010//). T-cell responses at baseline and during therapy with peginterferon-alpha and ribavirin are not associated with outcome in chronic hepatitis C infected patients. *Antiviral research*, 87(3), 353

**Judith C Brillman, Cameron S Crandall, Christopher S Florence, Joshua L Jacobs** (2002//). Prevalence and risk factors associated with hepatitis C in ED patients. *The American journal of emergency medicine*, 20(5), 476

**Juliane Kant, Bernd Moller, Renate Heyne, Adam Herber, Stephan Bohm, Melanie Maier,**

- 1  
2  
3  
4  
5  
6  
7  
8  
9  
10  
11  
12  
13  
14  
15  
16  
17  
18  
19  
20  
21  
22  
23  
24  
25  
26  
27  
28  
29  
30  
31  
32  
33  
34  
35  
36  
37  
38  
39  
40  
41  
42  
43  
44  
45  
46  
47  
48  
49  
50  
51  
52  
53  
54  
55  
56  
57  
58  
59  
60
- Uwe G Liebert, Joachim Mossner, Thomas Berg, Johannes Wiegand** (2013//). Evaluation of a rapid on-site anti-HCV test as a screening tool for hepatitis C virus infection. *European journal of gastroenterology & hepatology*, 25(4), 416
- Jabbari A., Besharat S., Khodabakshi B.** (2008//). Hepatitis C in hemodialysis centers of golestan province, northeast of Iran (2005) *Hepatitis Monthly*, 8(1), 61
- Janot C., Botte C.** (1992//). Hepatitis C virus *Revue française de transfusion et d'hémiobiologie : bulletin de la Société nationale de transfusion sanguine*, 35(3), 155
- Jeong M.-S., Ahn D.-R.** (2015//). A microwell plate-based multiplex immunoassay for simultaneous quantitation of antibodies to infectious viruses *The Analyst*, 140(6), 1995
- Jourbert J.J., Dewar J.B., Weinberg J., De Beer M., Parker J.S., Steele A.D.** (2003//). A cost-effective particle agglutination assay to detect viral antibodies in dried blood spots--a simple solution to HIV and HCV screening *The Central African journal of medicine*, 49(11-12), 127
- Jullien A.M.** (1995//). Transfusion and hepatitis C *Pathologie-biologie*, 43(8), 725
- Jusot J.F., Aubert C., Leconte Des Floris M.F., Rotily M., Lancon F., Colin C., Jullien A.M., Fournel J.J., Laubriat L., Fabre G., Botte C., Montchamont P.** (2002//). Declared hepatitis C screening strategies in blood recipients in French hospitals *Transfusion Clinique et Biologique*, 9(2), 130
- Kabongo N., Baule C., Van Vuuren M.** (2003//). Molecular analysis of bovine viral diarrhoea virus isolates from South Africa *Onderstepoort Journal of Veterinary Research*, 70(4), 273
- Kalus U., Wilkemeyer I., Caspari G., Schroeter J., Pruss A.** (2011//). Validation of the serological testing for anti-HIV-1/2, anti-HCV, HBsAg, and anti-HBc from post-mortem blood on the Siemens-BEP-III automatic system *Transfusion Medicine and Hemotherapy*, 38(6), 365
- Kannangai R., Abraham A.M., Sankar S., Sridharan G.** (2010//). Nanotechnology tools for single-virus particle detection *Indian Journal of Medical Microbiology*, 28(2), 95
- Kasprowicz V.O., Halliday J.S., Mitchell J., Klenerman P.** (2012//). MIGRAs: Are they the new IGRAs? Development of monokine-amplified IFN-gamma release assays *Biomarkers in Medicine*, 6(2), 177
- Kaur H., Dhanao J., Oberoi A.** (2000//). Evaluation of rapid kits for detection of HIV, HBsAg and HCV infections *Indian journal of medical sciences*, 54(10), 432
- Kenfe F.R., Urbaczek A.C., Silva J.C., Neo T.A., da Silva F.H., da Costa P.I.** (2013//). Development of diagnostic methods and study of the immunoreactivity of a mixture of recombinant core and E2 proteins fused to GST with control serum positive for hepatitis C *Talanta*, 110(#issue#), 32
- Khedmat H., Alavian S.-M., Miri S.M., Amini M., Abolghasemi H., Hajibeigi B., Alaeddini F., Fallahian F.** (2009//). Trends in seroprevalence of hepatitis B, hepatitis C, HIV, and syphilis infections in Iranian blood donors from 2003 to 2005 *Hepatitis Monthly*, 9(1), 24
- Khudyakov Y.E., Khudyakova N.S., Fields H.A., Jue D., Starling C., Favorov M.O., Krawczynski K., Polish L., Mast E., Margolis H.** (1993//). Epitope mapping in proteins of hepatitis E virus *Virology*, 194(1), 89
- Kintzios S.E.** (2007//). Cell-based biosensors in clinical chemistry *Mini-Reviews in Medicinal Chemistry*, 7(10), 1019
- Kisiel E., Radkowski M., Pawelczyk A., Horban A., Stanczak J., Bukowska-Osko I., Caraballo Cortes K., Kazmierczak J., Popiel M., Laskus T.** (2014//). Seronegative hepatitis C virus infection in patients with lymphoproliferative disorders *Journal of Viral Hepatitis*, 21(6), 424
- Kobayashi K., Ueno Y., Suzuki H., Miura M., Nagatomi R., Ishii M., Toyota T.** (1994//). Anti-idiotypic antibody production in hepatitis B vaccine recipients *Journal of Gastroenterology*, 29(6), 740
- Kodama T., Ichiyama S., Sato K., Nada T., Nakashima N.** (1998//). Evaluation of a membrane filter assay system, ortho HCV Ab quik pack, for detection of anti-hepatitis C virus antibody *Journal of Clinical Microbiology*, 36(5), 1439
- Kolho E., Naukkarinen R., Krusius T.** (1992//). Transmission of HCV infection by RIBA indeterminate and positive blood units *Transfusion medicine (Oxford, England)*, 2(3), 243
- Kondo Y., Kimura O., Tanaka Y., Ninomiya M., Iwata T., Kogure T., Inoue J., Sugiyama M., Morosawa T., Fujisaka Y., Shimosegawa T.** (2015//). Differential Expression of CX3CL1 in Hepatitis B Virus-Replicating Hepatoma Cells Can Affect the Migration Activity of CX3CR1+ Immune Cells *Journal of virology*, 89(14), 7016

**Kossen K., Vaish N.K., Jadhav V.R., Pasko C., Wang H., Jenison R., McSwiggen J.A., Polisky B., Seiwert S.D.** (2004//). High-throughput ribozyme-based assays for detection of viral nucleic acids *Chemistry and Biology*, 11(6), 807

**Koutouzov S., Jeronimo A.L., Campos H., Amoura Z.** (2004//). Nucleosomes in the pathogenesis of systemic lupus erythematosus *Rheumatic Disease Clinics of North America*, 30(3), 529

**Kroes A.C.M., Quint W.G.V., Heijntink R.A.** (1991//). Significance of isolated hepatitis C core antibodies detected by enzyme immunoassay in a high risk population *Journal of Medical Virology*, 35(2), 96

**Kroot J.J.C., Tjalsma H., Fleming R.E., Swinkels D.W.** (2011//). Hepcidin in human iron disorders: Diagnostic implications *Clinical Chemistry*, 57(12), 1650

**Kucirka L.M., Dagher N.N., Montgomery R.A., Segev D.L., Singer A.L.** (2010//). High infectious risk organ donors in kidney transplantation: Risks, benefits, and current practices *Dialysis and Transplantation*, 39(5), 186

**Kucukbayrak A., Cakmak S., Hakyemez I.N., Tas T., Akdeniz H.** (2013//). Determining immunoassay cutoff value using Western blot results to predict hepatitis C infection in blood donors with low-titer anti-HCV reactivity *Folia Microbiologica*, 58(4), 343

**Level 1, Form Title & abstract screen, Is it or does it include an original ...**

**K A Laycock, L R Essary, S Delaney, M C Kuhns, J S Pepose** (1997//). A critical evaluation of hepatitis C testing of cadaveric corneal donors. *Cornea*, 16(2), 146

**K Aoyagi, K Iida, C Ohue, Y Matsunaga, E Tanaka, K Kiyosawa, S Yagi** (2001//). Performance of a conventional enzyme immunoassay for hepatitis C virus core antigen in the early phases of hepatitis C infection. *Clinical laboratory*, 47(3-4), 119

**K E Sherman, R L Creager, J O'Brien, S Sargent, S Piacentini, T Thieme** (1994//). The use of oral fluid for hepatitis C antibody screening. *The American journal of gastroenterology*, 89(11), 2025

**K H Chau, G J Dawson, I K Mushahwar, R A Gutierrez, R G Johnson, R R Lesniewski, L Mattsson, O Weiland** (1991//). IgM-antibody response to hepatitis C virus antigens in acute and chronic post-transfusion non-A, non-B hepatitis. *Journal of virological methods*, 35(3), 343

**K K Watanabe, M P Busch, G B Schreiber, T F Zuck** (2000//). Evaluation of the safety of Rh immunoglobulin by monitoring viral markers among Rh-negative female blood donors. *Vox sanguinis*, 78(1), 1

**K M Walsh, A Fletcher, R N MacSween, A J Morris** (2000//). Basement membrane peptides as markers of liver disease in chronic hepatitis C. *Journal of hepatology*, 32(2), 325

**K Makris, V Kouvelis, I Drakopoulos, E Oikonomou, A Maniatis** (1995//). Frequency and characteristics of post-transfusion hepatitis in Greece with emphasis on hepatitis C: comparing second- and third-generation assays. *Transfusion medicine (Oxford, England)*, 5(3), 213

**K Malm, E Kragstjerg, S Andersson** (2015//). Performance of Liaison XL automated immunoassay platform for blood-borne infection screening on hepatitis B, hepatitis C, HIV 1/2, HTLV 1/2 and *Treponema pallidum* serological markers. *Transfusion medicine (Oxford, England)*, 25(2), 101

**K Minegishi, A Yoshikawa, S Kishimoto, H Yugi, N Yokoya, M Sakurada, H Kiyokawa, K Nishioka, Japanese Red Cross NAT Screening Research Group** (2003//). Superiority of minipool nucleic acid amplification technology for hepatitis B virus over chemiluminescence immunoassay for hepatitis B surface antigen screening. *Vox sanguinis*, 84(4), 287

**K Nishioka** (1996//). Hepatitis C virus screening and intravenous immunoglobulin safety in Japan. *Clinical therapeutics*, 18 Suppl B(#issue#), 83

**K Nishioka** (1994//). Epidemiological studies on hepatitis C virus infection: detection, prevalence, exposure and prevention. *Intervirology*, 37(2), 58

**K Siemoneit, M da Silva Cardoso, A Wolpl, S Epple, H Wintersinger, K Koerner, B Kubanek** (1994//). Isotype-specific immune response to a single hepatitis C virus core epitope defined by a human monoclonal antibody: diagnostic value and correlation to PCR. *Annals of hematology*, 69(3), 129

**K Sjoberg, S Lindgren, S Eriksson** (1997//). Frequent occurrence of non-specific gliadin antibodies in chronic liver disease. Endomysial but not gliadin antibodies predict coeliac disease in patients with chronic liver disease. *Scandinavian journal of gastroenterology*, 32(11), 1162

**K Skaug, H Li, T O Jonassen, J Larsen, K J Figenschau** (1993//). Hepatitis C virus (HCV) RNA among anti-HCV-positive blood donors and their recipients. *Vox sanguinis*, 64(4), 215



**K Takahashi, H Okamoto, S Kishimoto, E Munekata, K Tachibana, Y Akahane, H Yoshizawa, S Mishiro** (1992//). Demonstration of a hepatitis C virus-specific antigen predicted from the putative core gene in the circulation of infected hosts. *The Journal of general virology*, 73 ( Pt 3)(#issue#), 667

**K Vahdat, H Keyvani, S M Tabib, S Rostamabadi, S M Valizadeh, S Cheraghi, S Shamsian, K Zandi** (2010//). Molecular epidemiology of hepatitis C virus genotypes in Bushehr province, Iran. *European review for medical and pharmacological sciences*, 14(10), 861

**K Wang, Y Chen, S Liu, S Qiu, S Gao, X Huang, J Zhang, X Peng, W Qiani, J Y Zhang** (2009//). Immunogenicity of Ra1A and its tissue-specific expression in hepatocellular carcinoma. *International journal of immunopathology and pharmacology*, 22(3), 735

**K X Luo, Z S Liang, S C Yang, R Zhou, Q H Meng, Y W Zhu, H T He, S Jiang** (1993//). Etiological investigation of acute post-transfusion non-A, non-B hepatitis in China. *Journal of medical virology*, 39(3), 219

**K Y Hung, K C Lee, C J Yen, K D Wu, T J Tsai, W Y Chen** (1997//). Revised cutoff values of serum aminotransferase in detecting viral hepatitis among CAPD patients: experience from Taiwan, an endemic area for hepatitis B. *Nephrology, dialysis, transplantation : official publication of the European Dialysis and Transplant Association - European Renal Association*, 12(1), 180

**Kamyar Kalantar-Zadeh, Charles J McAllister, Loren G Miller** (2005//). Clinical characteristics and mortality in hepatitis C-positive haemodialysis patients: a population based study. *Nephrology, dialysis, transplantation : official publication of the European Dialysis and Transplant Association - European Renal Association*, 20(8), 1662

**Kamyar Kalantar-Zadeh, Loren G Miller, Eric S Daar** (2005//). Diagnostic discordance for hepatitis C virus infection in hemodialysis patients. *American journal of kidney diseases : the official journal of the National Kidney Foundation*, 46(2), 290

**Kathleen A Brady, Mark Weiner, Barbara J Turner** (2009//). Undiagnosed hepatitis C on the general medicine and trauma services of two urban hospitals. *The Journal of infection*, 59(1), 62

**Katja Pfafferott, Pooja Deshpande, Elizabeth McKinnon, Shahzma Merani, Andrew Lucas, David Heckerman, Simon Mallal, Mina John, Silvana Gaudieri, Michaela Lucas** (2015//). Anti-

hepatitis C virus T-cell immunity in the context of multiple exposures to the virus. *PLoS one*, 10(6), e0130420

**Kazuyuki Sogawa, Kenta Noda, Hiroshi Umemura, Masanori Seimiya, Takahisa Kuga, Takeshi Tomonaga, Motoi Nishimura, Fumihiko Kanai, Fumio Imazeki, Hirotaka Takizawa, Masato Yoneda, Atsushi Nakajima, Mikihiro Tsutsumi, Osamu Yokosuka, Fumio Nomura** (2013//). Serum fibrinogen alpha C-chain 5.9 kDa fragment as a biomarker for early detection of hepatic fibrosis related to hepatitis C virus. *Proteomics. Clinical applications*, 7(5-6), 424

**Keane K Y Lai, Ming Jin, Shan Yuan, Meaghan F Larson, Jason A Dornitz, Daniel D Bankson** (2011//). Improved reflexive testing algorithm for hepatitis C infection using signal-to-cutoff ratios of a hepatitis C virus antibody assay. *Clinical chemistry*, 57(7), 1050

**Ken Stein, Kim Dalziel, Andrew Walker, Becky Jenkins, Alison Round, Pam Royle** (2004//). Screening for Hepatitis C in injecting drug users: a cost utility analysis. *Journal of public health (Oxford, England)*, 26(1), 61

**Kenji Abe, Eriko Hayakawa, Andrei V Sminov, Anna L Rossina, Xin Ding, Tran T-T Huy, Tetsutaro Sata, Vasily F Uchaikin** (2004//). Molecular epidemiology of hepatitis B, C, D and E viruses among children in Moscow, Russia. *Journal of clinical virology : the official publication of the Pan American Society for Clinical Virology*, 30(1), 57

**Kerstin Uhde-Holzem, Verena Schlosser, Sergei Viazov, Rainer Fischer, Ulrich Commandeur** (2010//). Immunogenic properties of chimeric potato virus X particles displaying the hepatitis C virus hypervariable region I peptide R9. *Journal of virological methods*, 166(1-2), 12

**Klaus H W Boeker, Christian I Haberkorn, Dirk Michels, Peer Flemming, Michael P Manns, Ralf Lichtinghagen** (2002//). Diagnostic potential of circulating TIMP-1 and MMP-2 as markers of liver fibrosis in patients with chronic hepatitis C. *Clinica chimica acta; international journal of clinical chemistry*, 316(1-2), 71

**Kristen L Hess, Dennis G Fisher, Grace L Reynolds** (2014//). Sensitivity and specificity of point-of-care rapid combination syphilis-HIV-HCV tests. *PLoS one*, 9(11), e112190

**Kuo Zhang, Lunan Wang, Guigao Lin, Jinming Li** (2015//). Is Anti-Hepatitis C Virus Antibody Level an Appropriate Marker to Preclude the Need for Supplemental Testing. *Intervirology*, 58(5), 310

**Kyoumi Nakazato, Satoru Tomioka, Katsuyuki**

- 1  
2  
3  
4  
5  
6  
7  
8  
9  
10  
11  
12  
13  
14  
15  
16  
17  
18  
19  
20  
21  
22  
23  
24  
25  
26  
27  
28  
29  
30  
31  
32  
33  
34  
35  
36  
37  
38  
39  
40  
41  
42  
43  
44  
45  
46  
47  
48  
49  
50  
51  
52  
53  
54  
55  
56  
57  
58  
59  
60
- Nakajima, Hidetoshi Saito, Mihoko Kato, Tsukasa Kodaira, Shin-ichi Yatsuzuka, Younosuke Shimomura, Tomoko Hiroki, Kahoko Motoyama, Hiroko Kodama, Takeaki Nagamine** (2014//). Determination of the serum metallothionein (MT)1/2 concentration in patients with Wilson's disease and Menkes disease. *Journal of trace elements in medicine and biology : organ of the Society for Minerals and Trace Elements (GMS)*, 28(4), 441
- L Baccaglioni, K Thongprasom, M Carrozzo, M Bigby** (2013//). Urban legends series: lichen planus. *Oral diseases*, 19(2), 128
- L Bakkali, R Guillou, M Gonzague, C Cruciere** (1994//). A rapid and sensitive chemiluminescence dot-immunobinding assay for screening hybridoma supernatants. *Journal of immunological methods*, 170(2), 177
- L De Cock, V Hutse, E Verhaegen, S Quoilin, H Vandenberghe, R Vranckx** (2004//). Detection of HCV antibodies in oral fluid. *Journal of virological methods*, 122(2), 179
- L E Prescott, A Berger, J M Pawlotsky, P Conjeevaram, I Pike, P Simmonds** (1997//). Sequence analysis of hepatitis C virus variants producing discrepant results with two different genotyping assays. *Journal of medical virology*, 53(3), 237
- L H Tobler, G Tegtmeier, S L Stramer, S Quan, J Dockter, C Giachetti, M P Busch** (2000//). Lookback on donors who are repeatedly reactive on first-generation hepatitis C virus assays: justification and rational implementation. *Transfusion*, 40(1), 15
- L H Tobler, S L Stramer, D Y Chien, S Lin, P Arcangel, B H Phelps, S L Cooper, M P Busch** (2007//). Antibodies to a novel antigen in acute hepatitis C virus infections. *Vox sanguinis*, 92(1), 1
- L H Tobler, S L Stramer, S R Lee, D Baggett, D Wright, D Hirschhorn, I Walsh, M P Busch** (2005//). Performance of ORTHO HCV core antigen and trak-C assays for detection of viraemia in pre-seroconversion plasma and whole blood donors. *Vox sanguinis*, 89(4), 201
- L Imberti, A Sottini, A Bettinardi, C Mazza, A Albertini, D Primi** (1992//). Non-radioisotopic methods for DNA probes. *Annales de biologie clinique*, 50(3), 163
- L Imberti, E Cariani, A Bettinardi, A Zonaro, A Albertini, D Primi** (1991//). An immunoassay for specific amplified HCV sequences. *Journal of virological methods*, 34(3), 233
- L J van Doorn, B Kleter, I Pike, W Quint** (1996//). Analysis of hepatitis C virus isolates by serotyping and genotyping. *Journal of clinical microbiology*, 34(7), 1784
- L Jin, X Wei, J Gomez, M Datta, A Birkett, D L Peterson** (1995//). Use of alpha-N,N-bis[carboxymethyl]lysine-modified peroxidase in immunoassays. *Analytical biochemistry*, 229(1), 54
- L M Mison, I F Young, M O'Donoghue, N Cowley, N Thorlton, C A Hyland** (1997//). Prevalence of hepatitis C virus and genotype distribution in an Australian volunteer blood donor population. *Transfusion*, 37(1), 73
- L M Webber, S Els, M B Taylor, W O Grabow** (1996//). Assessment of commercial enzyme immunoassay for hepatitis C virus serotyping. *Journal of clinical pathology*, 49(12), 994
- L Montebugnoli, G Borea, R Miniero, G Sprovieri** (1999//). A rapid test for the visual detection of anti-hepatitis C virus antibodies in whole blood. *Clinica chimica acta; international journal of clinical chemistry*, 288(1-2), 91
- L Sheng, A Widyastuti, H Kosala, J Donck, Y Vanrenterghem, E Setijoso, A Soumillion, C Verslype, R Schelstraete, M P Emonds, G Hess, S H Yap** (1998//). High prevalence of hepatitis G virus infection compared with hepatitis C virus infection in patients undergoing chronic hemodialysis. *American journal of kidney diseases : the official journal of the National Kidney Foundation*, 31(2), 218
- L Urbanelli, P Fortugno, F Bartoli, M Nuzzo, A De Tomassi, F Felici, P Monaci** (2000//). "Affinity maturation" of ligands for HCV-specific serum antibodies. *Journal of immunological methods*, 236(1-2), 167
- Laila Ahmed, Hosny Salama, Rasha Ahmed, Sherif Hamdy, Wafaa Al-Akel, Sanaa Abdel Shafi, Abeer Mahgoub, Amal Hareedy, Wael Fathy** (2009//). Non-invasive fibrosis seromarkers as a predictor of liver fibrosis in chronic hepatitis C and/or non-alcoholic steatohepatitis. *Arab journal of gastroenterology : the official publication of the Pan-Arab Association of Gastroenterology*, 10(1), 14
- Laurence Cagnon, Pamela Wagaman, Ralf Bartenschlager, Thomas Pietschmann, Tiejun Gao, Norman M Kneteman, David L J Tyrrell, Chander Bahl, Patrick Niven, Stephen Lee, Kenneth A Simmen** (2004//). Application of the trak-C HCV core assay for monitoring antiviral activity in HCV replication systems. *Journal of virological methods*, 118(1), 23



1  
2  
3  
4  
5  
6  
7  
8  
9  
10  
11  
12  
13  
14  
15  
16  
17  
18  
19  
20  
21  
22  
23  
24  
25  
26  
27  
28  
29  
30  
31  
32  
33  
34  
35  
36  
37  
38  
39  
40  
41  
42  
43  
44  
45  
46  
47  
48  
49  
50  
51  
52  
53  
54  
55  
56  
57  
58  
59  
60

**Laurent Belec, Jerome Legoff, Ali Si-Mohamed, Francis Bloch, Francois Xavier Mbopi Keou, Pierre Becquart, Mathieu Matta, Thierry Prazuck, Jean Pierre Petite, Laurent Gutmann, Christopher Payan (2003//).** Mucosal humoral immune response to hepatitis C virus E1/E2 surface glycoproteins and HCV shedding in saliva and cervicovaginal fluids from chronically HCV-infected patients. *Journal of hepatology*, 38(6), 833

**Le Viet, Nguyen Thi Ngoc Lan, Phung Xuan Ty, Bjorn Bjorkvoll, Hedda Hoel, Tore Gutteberg, Anne Husebekk, Stig Larsen, Eystein Skjerve, Hans Husum (2012//).** Prevalence of hepatitis B & hepatitis C virus infections in potential blood donors in rural Vietnam. *The Indian journal of medical research*, 136(1), 74

**Lena Novack, Eilat Shinar, Jamal Safi, Hassan Soliman, Arieah Yaari, Noya Galai, Joseph S Pliskin, Batia Sarov (2007//).** Evaluation of pooled screening for anti-HCV in two blood services set-ups. *Tropical medicine & international health : TM & IH*, 12(3), 415

**Leonard B Seeff, Jay H Hoofnagle (2003//).** Appendix: The National Institutes of Health Consensus Development Conference Management of Hepatitis C 2002. *Clinics in liver disease*, 7(1), 261

**Leticia de Paula Scalioni, Helena Medina Cruz, Vanessa Salete de Paula, Juliana Custodio Miguel, Vanessa Alves Marques, Cristiane Alves Villela-Nogueira, Flavio Augusto Padua Milagres, Marcelo Santos Cruz, Francisco Inacio Bastos, Tarcisio Matos Andrade, Ana Rita Coimbra Motta-Castro, Lia Laura Lewis-Ximenez, Elisabeth Lampe, Livia Melo Villar (2014//).** Performance of rapid hepatitis C virus antibody assays among high- and low-risk populations. *Journal of clinical virology : the official publication of the Pan American Society for Clinical Virology*, 60(3), 200

**Li Xie, Xiao-dong Wu, De-zhuang Huang, Hai-lun Chen, Li-xiang He, Jian Wang, Da-kang Han (2007//).** Clinical application and analysis of hepatitis C virus NS3 antigen detection by ELISA in human serum. *Chinese medical journal*, 120(4), 294

**Li Zhou, Rui Gong, Xuan Lu, Yi Zhang, Jingfeng Tang (2015//).** Development of a Multiplex Real-Time PCR Assay for the Detection of *Treponema pallidum*, HCV, HIV-1, and HBV. *Japanese journal of infectious diseases*, 68(6), 481

**Li-Hua Hou, Gui-Xin Du, Rong-Bin Guan, Yi-Gang Tong, Hai-Tao Wang (2003//).** In vitro assay for HCV serine proteinase expressed in insect cells. *World journal of gastroenterology*, 9(7), 1629

**Li-Xin Zhu, Jing Liu, Ye Ye, You-Hua Xie, Yu-Ying Kong, Guang-Di Li, Yuan Wang (2004//).** A candidate DNA vaccine elicits HCV specific humoral and cellular immune responses. *World journal of gastroenterology*, 10(17), 2488

**Lihua Hou, Guixin Du, Yigang Tong, Haitao Wang (2002//).** Identification of B cell epitopes of hepatitis C virus RNA dependent RNA polymerase. *Journal of virological methods*, 104(1), 1

**Lin Shi, Shan Liu, Gui-Xiang Fan, Li Sheng, Hui-Xun Ren, Yu-Kang Yuan (2006//).** Effective induction of type 1 cytotoxic T cell responses in mice with DNA vaccine encoding two hepatitis C virus cytotoxic T lymphocyte epitopes. *Viral immunology*, 19(4), 702

**Lina Andrea Gomez, Oscar Penuela, Fernando Higuera (2014//).** Prevalence of antibodies against transfusion-transmissible infections (TTI) in blood donors from the Colombian eastern region. *Clinical laboratory*, 60(5), 869

**Lina Souan, Faten Tout, Mahmoud Siag, Maher A Sughayer (2016//).** Seroprevalence rates of transfusion-transmitted infections among blood donors in Jordan. *Journal of infection in developing countries*, 10(4), 377

**Linda Petrone, Teresa Chiacchio, Valentina Vanini, Elisa Petruccioli, Gilda Cuzzi, Cristina Di Giacomo, Luigia Pucci, Marzia Montalbano, Raffaella Lionetti, Angela Testa, Daniele Lapa, Assunta Navarra, Ubaldo Visco-Comandini, Delia Goletti (2014//).** High urine IP-10 levels associate with chronic HCV infection. *The Journal of infection*, 68(6), 591

**Luan Felipe Botelho-Souza, Alcione de Oliveira dos Santos, Lourdes Maria Borzacov, Eduardo Resende Honda, Juan Miguel Villalobos-Salcedo, Deusilene Souza Vieira (2014//).** Development of a reverse transcription quantitative real-time PCR-based system for rapid detection and quantitation of hepatitis delta virus in the western Amazon region of Brazil. *Journal of virological methods*, 197(#issue#), 19

**Labeledzka H., Simon K., Gladysz A. (2002//).** Clinical and epidemiological assessment of hepatitis C virus infection among voluntary blood donors *Medical Science Monitor*, 8(8), CR591

**Lagerkvist A.C., Foldes-Papp Z., Persson M.A.A., Rigler R. (2001//).** Fluorescence correlation spectroscopy as a method for assessment of interactions between phage displaying antibodies and soluble antigen *Protein Science*, 10(8), 1522

**Laperche S.,Elghouzzi M.H.,Morel P.,Asso-Bonnet M.,Le Marrec N.,Girault A.,Servant-Delmas A.,Bouchardeau F.,Deschaseaux M.,Piquet Y.** (2005//). Is an assay for simultaneous detection of hepatitis C virus core antigen and antibody a valuable alternative to nucleic acid testing? *Transfusion*, 45(12), 1965

**Latt N.L.,Araz F.,Alachkar N.,Durand C.M.,Gurakar A.** (2015//). Management of hepatitis C infection among patients with renal failure *Minerva gastroenterologica e dietologica*, 61(1), 39

**Laurent F.,Li J.S.,Vitivitski L.,Berby F.,Lamelin J.P.,Alonso C.,Trepo C.** (1992//). Importance of PCR in the diagnosis of hepatitis C *Revue française de transfusion et d'hémiobiologie : bulletin de la Société nationale de transfusion sanguine*, 35(3), 211

**Leforban Y.,Edwards S.,Ibata G.,Vannier P.** (1990//). A blocking ELISA to differentiate hog cholera virus antibodies in pig sera from those due to other pestiviruses *Annales de recherches vétérinaires. Annals of veterinary research*, 21(2), 119

**Levast M.,Larrat S.,Thelu M.-A.,Nicod S.,Plages A.,Cheveau A.,Zarski J.-P.,Seigneurin J.-M.,Morand P.,Leroy V.** (2010//). Prevalence and impact of occult hepatitis B infection in chronic hepatitis C patients treated with pegylated interferon and ribavirin *Journal of Medical Virology*, 82(5), 747

**Li F.H.,Guo L.S.,Yu Z.Q.,Wang Y.K.,Qi J.Y.,Yuan X.W.,Hao L.J.** (1993//). Establishment and application of SPA-co-operated ELISA for detection of anti-HCV-IgM *Journal of Tongji Medical University = Tong ji yi ke da xue xue bao*, 13(4), 209

**Li L.,Wang W.,Yu X.** (2000//). Detection of hepatitis C virus RNA in the tissue of hepatocellular carcinoma by multiple detection system *Zhonghua shi yan he lin chuang bing du xue za zhi = Zhonghua shiyan he linchuang bingduxue zazhi = Chinese journal of experimental and clinical virology*, 14(1), 47

**Liebermann H.E.H.,Sietmann R.,Bange R.,Wazel W.,Riebe R.** (2005//). RiV particles are heat stable *Engineering in Life Sciences*, 5(3), 240

**Lin H.H.,Kao J.H.,Mizokami M.,Huang S.C.,Chen P.J.,Chen D.S.** (1996//). Serotypes, genotypes and levels of hepatitis C viremia in pregnant women in Taiwan *Journal of the Formosan Medical Association = Taiwan yi zhi*, 95(6), 429

**Lindley E.,Elseviers M.,Moll R.,Jadoul M.,Jayesekera H.,Zampieron A.,Harrington M.,De Vos J.-Y.** (2001//). Epidemiology and management of hepatitis C in haemodialysis patients: An informal multidisciplinary review *EDTNA-ERCA Journal*, 27(3), 156

**Liu H.,Zhang J.,Wang S.,Pang Z.,Wang Z.,Zhou W.,Wu M.** (2012//). Screening of autoantibodies as potential biomarkers for hepatocellular carcinoma by using T7 phase display system *Cancer Epidemiology*, 36(1), 82

**Liu P.,Shi Z.X.,Zhang Y.C.,Zhang X.Y.** (1998//). Comparative study on 4 EIA kits for screening antibody to hepatitis C virus in pooled sera *Biomedical and environmental sciences : BES*, 11(1), 75

**Long G.S.,Bacon B.R.,Bisceglie A.M.** (1996//). Interpreting serologic tests for hepatitis C virus infection: balancing cost and clarity *Cleveland Clinic journal of medicine*, 63(5), 264

**Lopes E.P.,Granato C.H.,Lanzoni V.,Granero L.,Paranhos-Baccala G.,Tomiyama H.,Silva A.E.,Ferraz M.L.** (2000//). Evaluation of an enzyme immunoassay for hepatitis C virus antibody detection using a recombinant protein derived from the core region of hepatitis C virus genome *Memorias do Instituto Oswaldo Cruz*, 95(5), 717

**Loubiere S.,Rotily M.,Durand-Zaleski I.,Costagliola D.,Moatti J.-P.** (2001//). Adjunction of polymerase chain reaction in screening for hepatitis C virus RNA in blood donations: Misuse of the principle of caution *Medecine/Sciences*, 17(3), 344

**Lu S.C.,Chin L.T.,Wu F.M.,Hsieh G.J.,Haung S.P.,Chen J.C.,Chang A.C.,Hsieh W.K.,Chen B.H.** (1999//). Seroprevalence of CMV antibodies in a blood donor population and premature neonates in the south-central Taiwan *The Kaohsiung journal of medical sciences*, 15(10), 603

**Lucas R.E.,Faoagali J.L.** (1999//). The serological status of Solomon Island blood donors *The Southeast Asian journal of tropical medicine and public health*, 30(3), 542

**Luksamijarulkul P.,Thammata N.,Sujirarat D.,Tiloklurs M.** (2004//). Hepatitis C virus infection among Thai blood donors: Antibody prevalence, risk factors and development of risk screening form *Southeast Asian Journal of Tropical Medicine and Public Health*, 35(1), 147

**Lumbreras C.,Delgado R.,Fuertes A.,Loinaz C.,Iglesias J.,Colina F.,Aguado J.M.,Gimeno**

- 1  
2  
3  
4  
5  
6  
7  
8  
9  
10  
11  
12  
13  
14  
15  
16  
17  
18  
19  
20  
21  
22  
23  
24  
25  
26  
27  
28  
29  
30  
31  
32  
33  
34  
35  
36  
37  
38  
39  
40  
41  
42  
43  
44  
45  
46  
47  
48  
49  
50  
51  
52  
53  
54  
55  
56  
57  
58  
59  
60
- C.,Garcia I.,Lizasoain M.,Moreno E.,Noriega A.R.** (1994//). Clinical significance of hepatitis C virus (HCV) infection in liver transplant recipients: Role of serology and HCV RNA detection *Digestive Diseases and Sciences*, 39(5), 965
- Machado P.R.L.,Machado L.M.,Shibuya M.,Rego J.,Johnson W.D.,Glesby M.J.** (2015//). Viral co-infection and leprosy outcomes: A cohort study *PLoS Neglected Tropical Diseases*, 9(8), no pagination
- Madalinski K.,Godzik P.** (2009//). European demands for the formation of a hepatological laboratory network *Experimental and Clinical Hepatology*, 5(2), 39
- Maddrey W.C.,Greenberger N.J.** (1997//). Containing hepatitis C *Hospital Practice*, 32(3), 107
- Madhusudhan K.** (2014//). Sero-prevalence of hepatitis B and C co-infection in multi-transfused children in South India *Research Journal of Pharmaceutical, Biological and Chemical Sciences*, 5(5), 1192
- Magrin S.,Craxi A.,Fabiano C.,Simonetti R.G.,Fiorentino G.,Marino L.,Di quattro O.,Di Marco V.,Loiacono O.,Volpes R.,Almasio P.,Urdea M.S.,Neuwald P.,Sanchez-Pescador R.,Detmer J.,Wilber J.C.,Pagliaro L.** (1994//). Hepatitis C viremia in chronic liver disease: Relationship to interferon- alpha or corticosteroid treatment *Hepatology*, 19(2), 273
- Mahler M.,Kessenbrock K.,Szmyrka M.,Takasaki Y.,Garcia-De La Torre I.,Shoenfeld Y.,Hiepe F.,Shun-Le C.,Von Muhlen C.A.,Locht H.,Hopfl P.,Wiik A.,Reeves W.,Fritzler M.J.** (2006//). International multicenter evaluation of autoantibodies to ribosomal P proteins *Clinical and Vaccine Immunology*, 13(1), 77
- Maisonneuve P.,Noel L.** (1994//). Demonstrating antibodies against hepatitis C virus in transfusion practice. Viral Hepatitis Working Group of the Societe Francaise de la Transfusion Sanguine *Transfusion clinique et biologique : journal de la Societe francaise de transfusion sanguine*, 1(5), 397
- Makimura M.,Miyake S.,Akino N.,Takamori K.,Matsuura Y.,Miyamura T.,Saito I.** (1996//). Induction of antibodies against structural proteins of hepatitis C virus in mice using recombinant adenovirus *Vaccine*, 14(1), 28
- Makris G.C.,Makris M.C.,Wilmot V.V.,Geroulakos G.,Falagas M.E.** (2010//). The role of infection in carotid plaque pathogenesis and stability: The clinical evidence *Current Vascular Pharmacology*, 8(6), 861
- Makroo R.N.,Hegde V.,Chowdhry M.,Bhatia A.,Rosamma N.L.** (2015//). Seroprevalence of infectious markers & their trends in blood donors in a hospital based blood bank in north India *Indian Journal of Medical Research*, 142(September), 317
- Manamperi A.,Nugawela P.,Gunawardene N.S.,Abeyewickreme W.,De Silva J.** (2010//). RNA positivity rates among anti-HCV reactive blood donors in Sri Lanka: A preliminary study *Indian Journal of Medical Microbiology*, 28(3), 264
- Mangia A.,Antonucci F.,Brunetto M.,Capobianchi M.,Faggioli S.,Guido M.,Farci P.,Lampertico P.,Marzano A.,Niro G.,Pisani G.,Prati D.,Puoti M.,Raimondo G.,Santantonio T.,Smedile A.,Lauria F.** (2008//). The use of molecular assays in the management of viral hepatitis *Digestive and Liver Disease*, 40(6), 395
- Maniez-Montreuil M.,Dubois F.** (2000//). Interpretation of hepatitis C virus serology: Immunoblot assay and genomic amplification *Transfusion Clinique et Biologique*, 7(SUPPL. 1), 25
- Mansour-Ghaneel F.,Sadeghi A.,Mashhour M.Y.,Joukar F.,Besharati S.,Roshan Z.A.,Khosh-Sorur M.** (2009//). Prevalence of hepatitis B and C infection in hemodialysis patients of Rasht (Center of Guilan Province, Northern part of Iran) *Hepatitis Monthly*, 9(1), 45
- Marino Z.,Carrion J.A.,Bedini J.L.,Crespo G.,Martinez S.M.,Sanchez-Tapias J.M.,Forns X.,Navasa M.A.** (2011//). Evaluation of a portable hemoglobinometer (HemoCue) to control anemia in hepatitis C liver transplant recipients undergoing antiviral therapy *European Journal of Gastroenterology and Hepatology*, 23(10), 942
- Markowicz M.,Grilnberger E.,Huber F.,Leibl G.,Abrahamian H.,Gartner M.,Huber M.,Chott A.,Reiter M.,Stanek G.** (2013//). Case report: Lymphogranuloma venereum proctitis-from rapid screening to molecular confirmation of a masked sexually transmitted disease *Diagnostic Microbiology and Infectious Disease*, 76(4), 516
- Marson P.,Donadel C.,Lazzaro A.R.,Nardo G.,Tenan S.,Favero R.,Andrian C.,De Silvestro G.** (1997//). False positive anti-hepatitis C virus IgM core results in IgM monoclonal gammopathy *European Journal of Laboratory Medicine*, 5(1), 11
- Maudar K.K.,Gandhi P.,Mishra P.K.,Varshney S.,Punde R.,Bhargav A.** (2012//). Novel Approach for Quantification of Hepatitis C Virus in Liver Cirrhosis Using Real-Time Reverse Transcriptase PCR *Journal of Gastrointestinal Surgery*, 16(1), 142
- Maylin S.,Fouere S.,Simon F.,Delaugerre C.**

(2014//). Failure of fourth-generation enzyme immunoassay in HIV screening and plasma HIV-1 RNA detection in recent high-risk behavior *Intervirology*, 57(1), 49

**McArthur J.C.** (2012//). Painful small fiber neuropathies *CONTINUUM Lifelong Learning in Neurology*, 18(1), 106

**Mecchia M.,Casato M.,Tafi R.,Filocamo G.,Bonomo L.,Fiorilli M.,Cortese R.,Migliaccio G.,Nicosia A.** (1996//). Nonrheumatoid IgM in human hepatitis C virus-associated type II cryoglobulinemia recognize mimotopes of the CD4-like LAG-3 protein *Journal of immunology (Baltimore, Md. : 1950)*, 157(8), 3727

**Meena M.,Jindal T.,Hazarika A.** (2011//). Prevalence of hepatitis B virus and hepatitis C virus among blood donors at a tertiary care hospital in India: A five-year study *Transfusion*, 51(1), 198

**Melnyk O.,Duburcq X.,Olivier C.,Urbes F.,Auriault C.,Gras-Masse H.** (2002//). Peptide arrays for highly sensitive and specific antibody-binding fluorescence assays *Bioconjugate chemistry*, 13(4), 713

**Melve G.K.,Myrmel H.,Eide G.E.,Hervig T.** (2009//). Evaluation of the persistence and characteristics of indeterminate reactivity against hepatitis C virus in blood donors *Transfusion*, 49(11), 2359

**Mingorance L.,Friesland M.,Coto-Llerena M.,Perez-del-Pulgar S.,Boix L.,Lopez-Oliva J.M.,Bruix J.,Forns X.,Gastaminza P.** (2014//). Selective inhibition of hepatitis c virus infection by hydroxyzine and benzotropine *Antimicrobial Agents and Chemotherapy*, 58(6), 3451

**Miri-Dashe T.,Osawe S.,Daniel M.T.N.,Choji R.P.,Mamman I.,Deme K.,Damulak D.,Abimiku A.** (2014//). Comprehensive reference ranges for hematology and clinical chemistry laboratory parameters derived from normal Nigerian adults *PLoS ONE*, 9(5), no pagination

**Mishra D.,Pensi T.** (2004//). Transfusion Associated Hepatitis C in Multi-Transfused Thalassaemic Children [1] *Indian Pediatrics*, 41(3), 287

**Mittal M.,Zaman S.,Bhatnagar N.,Gajjar M.** (2013//). Transfusion transmitted infections in patients with hemophilia: A study from a tertiary care hospital in western India *Internet Journal of Infectious Diseases*, 12(1), no pagination

**Mizui M.,Moriya T.,Yoshizawa H.,Kondo M.,Saito T.,Imai M.,Nishioka K.** (1994//). A novel

agglutination method for screening of HIV and HCV antibody testing with 5-mul reagents: Reduction of cost and time with high sensitivity *Vox Sanguinis*, 67(3), 315

**Mizuno S.,Nakatani K.,Muraki Y.,Tanemura A.,Azumi Y.,Kuriyama N.,Ohsawa I.,Kishiwada M.,Usui M.,Sakurai H.,Tabata M.,Okuda M.,Nobori T.,Isaji S.** (2013//). Combination assays for evaluation of immune function and CYP3A5 genotype to identify the risk of infectious complications and mortality in living donor liver transplant patients *Annals of Transplantation*, 18(1), 349

**Moennig V.,Schagemann G.,Dahle J.,Greiser-Wilke I.,Leder L.** (1990//). A new approach for the diagnosis of hog cholera *DTW. Deutsche tierärztliche Wochenschrift*, 97(2), 91

**Mohamed A.A.,Hashem A.,Yassin A.S.,Elhusseiny E.M.,Saleh M.A.,Ahmed O.A.,Shabana S.S.,Ezzat O.** (2015//). Human aldehyde dehydrogenase (ALDH) in cirrhotic and hepatocellular carcinoma patients related to hepatitis C virus *Journal of Gastroenterology and Hepatology Research*, 4(10), 1792

**Mohammadali F.,Pourfathollah A.A.** (2014//). Changes in frequency of HBV, HCV, HIV and syphilis infections among blood donors in Tehran province 2005-2011 *Archives of Iranian Medicine*, 17(9), 613

**Mohammed H.,Linnen J.M.,Muhoz-Jorddn J.L.,Tomashek K.,Foster G.,Broulik A.S.,Petersen L.,Stramer S.L.** (2008//). Dengue virus in blood donations, Puerto Rico, 2005 *Transfusion*, 48(7), 1348

**Mohan K.V.,Murugavel K.G.,Rajanikanth,Mathews S.,Raghuram K.,Rajasambandam P.,Murali A.,Srinivas U.,Mathiazhagan,Palaniswamy K.R.,Panda S.K.,Thyagarajan S.P.** (1999//). Diagnosis of hepatitis C virus infection by ELISA, RIBA and RT-PCR: a comparative evaluation *Indian journal of gastroenterology : official journal of the Indian Society of Gastroenterology*, 18(2), 73

**Montebugnoli L.,Dolci G.** (2000//). Anti-HCV antibodies are detectable in the gingival crevicular fluid of HCV positive subjects *Minerva stomatologica*, 49(1-2), 1

**Moradi A.,Khodabakhshi B.,Sadeghipour M.,Besharat S.,Tabarraei A.** (2011//). Concurrent infections of hepatitis C and HIV in hepatitis B patients in the north-east of Iran *Tropical Doctor*, 41(3), 129

**Moretti M.,Pieretti B.,Masucci A.,Sisti D.,Rocchi**



- 1  
2  
3  
4  
5  
6  
7  
8  
9  
10  
11  
12  
13  
14  
15  
16  
17  
18  
19  
20  
21  
22  
23  
24  
25  
26  
27  
28  
29  
30  
31  
32  
33  
34  
35  
36  
37  
38  
39  
40  
41  
42  
43  
44  
45  
46  
47  
48  
49  
50  
51  
52  
53  
54  
55  
56  
57  
58  
59  
60
- M., Delprete E.** (2012//). Role of signal-to-cutoff ratios in hepatitis C virus antibody detection *Clinical and Vaccine Immunology*, 19(8), 1329
- Morgensztern D., Rosado M.F., Silva O., Santos E.S., Abdullah S.A., Goodman M., Hamilton-Nelson K., Rosenblatt J.D., Lossos I.S.** (2004//). Prevalence of hepatitis C infection in patients with non-Hodgkin's lymphoma in South Florida and review of the literature *Leukemia and Lymphoma*, 45(12), 2459
- Morrison B.J., Labo N., Miley W.J., Whitby D.** (2015//). Serodiagnosis for tumor viruses *Seminars in Oncology*, 42(2), 191
- Mousa N., Abdel-Razik A., El-Nahas H., El-Shazly A., Abdelaziz M., Nabih M., Hamed M., Eissa M., Effat N., Eldars W.** (2014//). Cryptosporidiosis in patients with diarrhea and chronic liver diseases *Journal of Infection in Developing Countries*, 8(12), 1584
- Moussa M.B., Barguelli F., Bouziani A., Amor A.** (2003//). Comparison of two hepatitis C virus typing assays in a tunisian population *Annales de Biologie Clinique*, 61(2), 234
- Muhammad S.K., Gurbakshani K.M., Shaikh B.A.** (2012//). Association of hepatitis (B, C & D) viral infection to gallstones in cirrhosis of liver *Medical Forum Monthly*, 23(9), 3
- Mujeeb S.A., Shahab S., Hyder A.A.** (2000//). Geographical display of health information: Study of hepatitis C infection in Karachi, Pakistan *Public Health*, 114(5), 413
- Mukherjee R., Burns A., Rodden D., Chang F., Chaum M., Garcia N., Bollipalli N., Niemz A.** (2015//). Diagnosis and Management of Hepatitis C Virus Infection *Journal of Laboratory Automation*, 20(5), 519
- Mulyanto, S Suwignyo, S Tsaury, K Itoh, M Mizui, F Tsuda, H Okamoto, H Yoshizawa, S Mishiro** (1996//). An easy dipstick assay for anti-core antibodies to screen blood donors for hepatitis C virus viremia. *Vox sanguinis*, 70(4), 229
- Murakami S., Takahashi Y., Yoshida S., Fuke I., Ohmae K., Mori C., Takagi M., Takamizawa A., Okayama H.** (1994//). Highly sensitive detection of viral RNA genomes in blood specimens by an optimized reverse transcription-polymerase chain reaction *Journal of Medical Virology*, 43(2), 175
- M B Carvalho, N Hamerschlag, R S Vaz, O C Jr Ferreira** (1996//). Risk factor analysis and serological diagnosis of HIV-1/HIV-2 infection in a Brazilian blood donor population: validation of the World Health Organization strategy for HIV testing. *AIDS (London, England)*, 10(10), 1135
- M Bes, S Sauleda, I Campos-Varela, F Rodriguez-Frias, N Casamitjana, M Homs, M Piron, J Quer, D Taberner, J Guardia, L Puig, J I Esteban** (2012//). IL28B genetic variation and hepatitis C virus-specific CD4(+) T-cell responses in anti-HCV-positive blood donors. *Journal of viral hepatitis*, 19(12), 867
- M Bonacini, H J Lin, F B Hollinger** (2001//). Effect of coexisting HIV-1 infection on the diagnosis and evaluation of hepatitis C virus. *Journal of acquired immune deficiency syndromes (1999)*, 26(4), 340
- M C Divano, A Parodi, A Reborra** (1992//). Lichen planus, liver kidney microsomal (LKM1) antibodies and hepatitis C virus antibodies. *Dermatology (Basel, Switzerland)*, 185(2), 132
- M Casato, D Lilli, G Donato, M Granata, V Conti, G Del Giudice, D Rivanera, C Scagnolari, G Antonelli, M Fiorilli** (2003//). Occult hepatitis C virus infection in type II mixed cryoglobulinaemia. *Journal of viral hepatitis*, 10(6), 455
- M Castella, G Tenderich, M M Koerner, L Arusoglu, A El-Banayosy, U Schulz, B Schulze, S Schulte-Eistrup, C Wolff, K Minami, R Koerfer** (2001//). Outcome of heart transplantation in patients previously infected with hepatitis C virus. *The Journal of heart and lung transplantation : the official publication of the International Society for Heart Transplantation*, 20(5), 595
- M Chen, M Sallberg, A Sonnerborg, O Weiland, L Mattsson, L Jin, A Birkett, D Peterson, D R Milich** (1999//). Limited humoral immunity in hepatitis C virus infection. *Gastroenterology*, 116(1), 135
- M Contreras, J A Barbara, C C Anderson, E Ranasinghe, C Moore, M T Brennan, D R Howell, S Aloysius, A Yardumian** (1991//). Low incidence of non-A, non-B post-transfusion hepatitis in London confirmed by hepatitis C virus serology. *Lancet (London, England)*, 337(8744), 753
- M da S Cardoso, S Epple, K Koerner, B Kubanek, D Ellbruck, E Seifried** (1991//). Investigating the presence of HIV sequences and the distribution of virological markers in hemophiliacs and their sexual partners. *Annals of hematology*, 63(6), 315
- M da Silva Cardoso, D Sturm, K Koerner, T Dengler, M Kerowgan, B Kubanek** (1997//). Anti-HCV envelope prevalence in blood donors from Baden-Wuerttemberg. *Annals of hematology*, 74(3), 135

**M da Silva Cardoso, K Siemoneit, D Sturm, C Krone, D Moradpour, B Kubanek** (1998//). Isolation and characterization of human monoclonal antibodies against hepatitis C virus envelope glycoproteins. *Journal of medical virology*, 55(1), 28

**M de Medina, M Ashby, V Schluter, M Hill, B Leclercq, J P Pennell, L J Jeffers, K R Reddy, E R Schiff, G Hess, G O Perez** (1998//). Prevalence of hepatitis C and G virus infection in chronic hemodialysis patients. *American journal of kidney diseases : the official journal of the National Kidney Foundation*, 31(2), 224

**M de Medina, S LaRue, M Hill, H O'Sullivan, J P Pennell, B Leclercq, X Li, L Jeffers, T Parker, K R Reddy, E R Schiff, G O Perez** (1997//). Quantitative detection of hepatitis C virus RNA in patients undergoing hemodialysis. *ASAIO journal (American Society for Artificial Internal Organs : 1992)*, 43(1), 19

**M E Lai, A P Mazzoleni, P Farci, A Melis, A Porru, G Orgiana, M Arnone, A Balestrieri** (1993//). Markers of hepatitis C virus infection in Sardinian blood donors: relationship with alanine aminotransferase levels. *Journal of medical virology*, 41(4), 282

**M E Lai, S De Virgillis, F Argioli, P Farci, A P Mazzoleni, V Lisci, M Rapicetta, M G Clemente, P Nurchis, M Arnone** (1993//). Evaluation of antibodies to hepatitis C virus in a long-term prospective study of posttransfusion hepatitis among thalassemic children: comparison between first- and second-generation assay. *Journal of pediatric gastroenterology and nutrition*, 16(4), 458

**M E Singer, Z M Younossi** (2001//). Cost effectiveness of screening for hepatitis C virus in asymptomatic, average-risk adults. *The American journal of medicine*, 111(8), 614

**M Enomoto, S Nishiguchi, S Shiomi, M Tanaka, K Fukuda, T Ueda, A Tamori, D Habu, T Takeda, Y Yano, S Otani** (2001//). Comparison of real-time quantitative polymerase chain reaction with three other assays for quantitation of hepatitis C virus. *Journal of gastroenterology and hepatology*, 16(8), 904

**M F Yuen, C K Hui, J C Yuen, J L Young, C L Lai** (2001//). The accuracy of SM-HCV rapid test for the detection of antibody to hepatitis C virus. *The American journal of gastroenterology*, 96(3), 838

**M Feitelson, L Lega, J Guo, M Resti, M E Rossi, C Azzari, B S Blumberg, A Vierucci** (1994//). Pathogenesis of posttransfusion viral hepatitis in

children with beta-thalassemia. *Hepatology (Baltimore, Md.)*, 19(3), 558

**M Francois, F Dubois, D Brand, Y Bacq, C Guerois, C Mouchet, J Tichet, A Goudeau, F Barin** (1993//). Prevalence and significance of hepatitis C virus (HCV) viremia in HCV antibody-positive subjects from various populations. *Journal of clinical microbiology*, 31(5), 1189

**M Fusconi, A Vannini, A C Dall'Aglio, G Pappas, F Cassani, G Ballardini, M Frisoni, A Grassi, F B Bianchi, D Zauli** (2005//). Anti-cyclic citrullinated peptide antibodies in type 1 autoimmune hepatitis. *Alimentary pharmacology & therapeutics*, 22(10), 951

**M I Merican** (1992//). Hepatitis C: an update. *The Medical journal of Malaysia*, 47(3), 158

**M J Nowicki, T R Welch, N Ahmad, I K Kuramoto, E C Mendoza, J B Zeldis, B M Baroudy, W F Balistreri** (1995//). Absence of hepatitis B and C viruses in pediatric idiopathic membranoproliferative glomerulonephritis. *Pediatric nephrology (Berlin, Germany)*, 9(1), 16

**M Jadoul, C Cornu, C van Ypersele de Strihou** (1993//). Incidence and risk factors for hepatitis C seroconversion in hemodialysis: a prospective study. The UCL Collaborative Group. *Kidney international*, 44(6), 1322

**M Janier, F Lassau, J Bloch, E Spindler, P Morel, P Gerard, A Aufrere** (1999//). Seroprevalence of herpes simplex virus type 2 antibodies in an STD clinic in Paris. *International journal of STD & AIDS*, 10(8), 522

**M K Arababadi, A A Pourfathollah, A Jafarzadeh, G Hassanshahi, M Salehi, B N Ahmadabadi, D Kennedy** (2011//). Hepatitis B virus genotype, HBsAg mutations and co-infection with HCV in occult HBV infection. *Clinics and research in hepatology and gastroenterology*, 35(8-9), 554

**M K Hourfar, L A Walch, G Geusendam, T Dengler, K Janetzko, K Gubbe, K Frank, A Karl, M Lohr, W Sireis, E Seifried, M Schmidt** (2009//). Sensitivity and specificity of Anti-HBc screening assays--which assay is best for blood donor screening?. *International journal of laboratory hematology*, 31(6), 649

**M Kimura, K I Tatsumi, H Tada, M Ikemoto, Y Fukuda, A Kaneko, M Kato, Y Hidaka, N Amino** (2000//). Enzyme immunoassay for autoantibodies to human liver-type arginase and its clinical application. *Clinical chemistry*, 46(1), 112

**M Kobayashi, K Chayama, Y Arase, A Tsubota, S**



- 1  
2  
3  
4  
5  
6  
7  
8  
9  
10  
11  
12  
13  
14  
15  
16  
17  
18  
19  
20  
21  
22  
23  
24  
25  
26  
27  
28  
29  
30  
31  
32  
33  
34  
35  
36  
37  
38  
39  
40  
41  
42  
43  
44  
45  
46  
47  
48  
49  
50  
51  
52  
53  
54  
55  
56  
57  
58  
59  
60
- Saitoh, Y Suzuki, M Kobayashi, K Ikeda, M Matsuda, H Koike, M Hashimoto, H Kumada** (1999//). Enzyme-linked immunosorbent assay to detect hepatitis C virus serological groups 1 to 6. *Journal of gastroenterology*, 34(4), 505
- M Krajden** (2000//). Hepatitis C virus diagnosis and testing. *Canadian journal of public health = Revue canadienne de sante publique*, 91 Suppl 1(#issue#), S34
- M Krajden, F Bishai, C Quan, J Mahony, J Brunton, D Rootman, J Zhao, W Lau, G Snell, J Maurer, S Kesten, D Colby** (1995//). Multi-organ donor transmission of hepatitis C virus to five solid organ transplant recipients and lack of transmission to corneal transplant recipients. *Clinical and diagnostic virology*, 3(2), 113
- M Krajden, J Zhao, C Bourke, V Scalia, P Gill, W Lau** (1996//). Detection of hepatitis C virus by PCR in second-generation enzyme immunoassay-seropositive blood donors by using matched pairs of fresh frozen plasma and pilot tube sera. *Journal of clinical microbiology*, 34(9), 2191
- M Leruez-Ville, Q T Nguyen, P Cohen, S Cocco, M Nouyou, F Ferriere, P Deny** (1998//). Large-scale analysis of hepatitis C virus serological typing assay: effectiveness and limits. *Journal of medical virology*, 55(1), 18
- M Luppi, M Grazia Ferrari, G Bonaccorsi, G Longo, F Narni, P Barozzi, R Marasca, C Mussini, G Torelli** (1996//). Hepatitis C virus infection in subsets of neoplastic lymphoproliferations not associated with cryoglobulinemia. *Leukemia*, 10(2), 351
- M Makuwa, S Souquiere, P Telfer, E Leroy, O Bourry, P Rouquet, S Clifford, E J Wickings, P Roques, F Simon** (2003//). Occurrence of hepatitis viruses in wild-born non-human primates: a 3 year (1998-2001) epidemiological survey in Gabon. *Journal of medical primatology*, 32(6), 307
- M Maniez-Montreuil, F Dubois** (2000//). [Interpretation of hepatitis C virus serology: immunoblot and genome amplification]. *Transfusion clinique et biologique : journal de la Societe francaise de transfusion sanguine*, 7 Suppl 1(#issue#), 25s
- M Moorthy, H D Daniel, G Kurian, P Abraham** (2008//). An evaluation of saliva as an alternative to plasma for the detection of hepatitis C virus antibodies. *Indian journal of medical microbiology*, 26(4), 327
- M N al Nasser** (1992//). Intrafamilial transmission of hepatitis C virus (HCV): a major mode of spread in the Saudi Arabia population. *Annals of tropical paediatrics*, 12(2), 211
- M Nishioka, S A Morshed, K Kono, T Himoto, S Parveen, K Arima, S Watanabe, M P Manns** (1997//). Frequency and significance of antibodies to P450IID6 protein in Japanese patients with chronic hepatitis C. *Journal of hepatology*, 26(5), 992
- M Nishioka, S A Morshed, S Parveen, K Kono, H Matsuoka, M P Manns** (1997//). Antibodies to P450IID6, SLA, PDH-E2 and BCKD-E2 in Japanese patients with chronic hepatitis. *Journal of gastroenterology and hepatology*, 12(12), 862
- M Ohmiya, J Hayashi, N Furusyo, K Ueno, Y Kishihara, S Nabeshima, S Kashiwagi** (1997//). Large dose natural interferon alpha therapy for patients with chronic hepatitis C. *Fukuoka igaku zasshi = Hukuoka acta medica*, 88(12), 380
- M Oketani, H Kawabata, S Imamura, E Maeda, H Tsubouchi, T Arima** (1993//). Development of a specific enzyme-linked immunosorbent assay for the hepatitis C virus antibody using clone 14. *Gastroenterologia Japonica*, 28(1), 56
- M P Busch, J C Wilber, P Johnson, L Tobler, C S Evans** (1992//). Impact of specimen handling and storage on detection of hepatitis C virus RNA. *Transfusion*, 32(5), 420
- M P Busch, K K Watanabe, J W Smith, S W Hermansen, R A Thomson** (2000//). False-negative testing errors in routine viral marker screening of blood donors. For the Retrovirus Epidemiology Donor Study. *Transfusion*, 40(5), 585
- M Pirisi, P Ferroni, C Fabris, P Toniutto, G Soardo, D Vitulli, V Gasparini, E Bartoli** (1995//). Anti-envelope antibodies in anti-hepatitis C virus (HCV) positive patients with and without liver disease. *Infection*, 23(1), 24
- M Psychogiou, A Katsoulidou, E Vaindirli, B Francis, S R Lee, A Hatzakis** (1997//). Immunologic events during the incubation period of hepatitis C virus infection: the role of antibodies to E2 glycoprotein. Multicentre Hemodialysis Cohort Study on Viral Hepatitis. *Transfusion*, 37(8), 858
- M Puoti, A Zonaro, A Ravaggi, M G Marin, F Castelnuovo, E Cariani** (1992//). Hepatitis C virus RNA and antibody response in the clinical course of acute hepatitis C virus infection. *Hepatology (Baltimore, Md.)*, 16(4), 877
- M R Biasin, G Fiordalisi, I Zanella, A Cavicchini, G Marchelle, D Infantolino** (1997//). A DNA

hybridization method for typing hepatitis C virus genotype 2c. *Journal of virological methods*, 65(2), 307

**M Rioche, P Dubreuil, A Kouassi-Samgare, V Akran, P Nordmann, J Pillot** (1997//). [Incidence of sporadic hepatitis E in Ivory Coast based on still problematic serology]. *Bulletin of the World Health Organization*, 75(4), 349

**M Roggendorf, M Lu, H Meisel, M Riffelmann, E Schreier, S Viazov** (1996//). Rational use of diagnostic tools in hepatitis C. *Journal of hepatology*, 24(2 Suppl), 26

**M Saito, A Hasegawa, T Kashiwakuma, M Kohara, M Sugi, K Miki, T Yamamoto, H Mori, Y Ohta, E Tanaka** (1992//). Performance of an enzyme-linked immunosorbent assay system for antibodies to hepatitis C virus with two new antigens (c11/c7). *Clinical chemistry*, 38(12), 2434

**M Tacke, K Kiyosawa, K Stark, V Schlueter, B Ofenloch-Haehnle, G Hess, A M Engel** (1997//). Detection of antibodies to a putative hepatitis G virus envelope protein. *Lancet (London, England)*, 349(9048), 318

**M Tacke, S Schmolke, V Schlueter, S Sauleda, J I Esteban, E Tanaka, K Kiyosawa, H J Alter, U Schmitt, G Hess, B Ofenloch-Haehnle, A M Engel** (1997//). Humoral immune response to the E2 protein of hepatitis G virus is associated with long-term recovery from infection and reveals a high frequency of hepatitis G virus exposure among healthy blood donors. *Hepatology (Baltimore, Md.)*, 26(6), 1626

**M Tordjeman, V Rabillon, D Abouth, C Trepo, A Hoffenbach, G Somme** (1993//). Specific detection of anti-HBc antibodies with an enzyme immunoassay using recombinant HBcAg and monoclonal antibodies. *Journal of virological methods*, 43(1), 21

**M Tsopanomichalou, M Ergazaki, S Linardopoulos, E Kouroumalis, D Spandidos** (1997//). Detection of hepatitis C virus in sera and genotyping according to the 5' non-coding region. *Oncology reports*, 4(6), 1171

**M U Mondelli, A Cerino, F Bono, A Cividini, A Maccabruni, M Arico, A Malfitano, G Barbarini, V Piazza, L Minoli** (1994//). Hepatitis C virus (HCV) core serotypes in chronic HCV infection. *Journal of clinical microbiology*, 32(10), 2523

**M U Mondelli, I Zorzoli, A Cerino, A Cividini, M Bissolati, L Segagni, V Perfetti, E Anesi, P Garini, G Merlini** (1998//). Clonality and specificity of cryoglobulins associated with HCV:

pathophysiological implications. *Journal of hepatology*, 29(6), 879

**M Vazquez-Del Mercado, L V Sanchez-Orozco, B A Pauley, J Y F Chan, E K L Chan, A Panduro, M Maldonado Gonzalez, M A Jimenez-Luevanos, B T Martin-Marquez, C A Palafox-Sanchez, I P Davalos-Rodriguez, M Salazar-Paramo, L Gonzalez-Lopez, J I Gamez-Nava, M Satoh** (2010//). Autoantibodies to a miRNA-binding protein Argonaute2 (Su antigen) in patients with hepatitis C virus infection. *Clinical and experimental rheumatology*, 28(6), 842

**M W Fried, J O Draguesku, M Shindo, L H Simpson, S M Banks, J H Hoofnagle, A M Di Bisceglie** (1993//). Clinical and serological differentiation of autoimmune and hepatitis C virus-related chronic hepatitis. *Digestive diseases and sciences*, 38(4), 631

**M Warny, R Brenard, C Cornu, J P Tomasi, A P Geubel** (1993//). Anti-neutrophil antibodies in chronic hepatitis and the effect of alpha-interferon therapy. *Journal of hepatology*, 17(3), 294

**M Watanabe, S Ohkoshi, H Tawaraya, T Miyajima, K Shimotohno, T Kamimura, H Asakura** (1994//). Hepatitis C viral markers in patients who received blood that was positive for hepatitis C virus core antibody, with genetic evidence of hepatitis C virus transmission. *Transfusion*, 34(2), 125

**M Wirz, G Gentili** (1994//). Detection of anti-HCV antibodies in immunoglobulin preparations by recombinant immunoblot assay. *Biologicals : journal of the International Association of Biological Standardization*, 22(1), 7

**M Y Kuo, L J Hahn, C Y Hong, J H Kao, D S Chen** (1993//). Low prevalence of hepatitis C virus infection among dentists in Taiwan. *Journal of medical virology*, 40(1), 10

**M Y Yu, B L Mason, D L Tankersley** (1994//). Detection and characterization of hepatitis C virus RNA in immune globulins. *Transfusion*, 34(7), 596

**M Zaier, M S Gallah, B Houissa, S Abdelkefi, L Ghachem, M Bouslama, H Miled, S Yacoub** (2002//). [Role of ALAT level in preventing post-transfusional hepatitis. Prospective study of 1,180 blood donors in Tunisia]. *La Tunisie medicale*, 80(8), 455

**M Zeremski, J Makeyeva, K Arasteh, D C Des Jarlais, A H Talal** (2012//). Hepatitis C virus-specific immune responses in noninjecting drug users. *Journal of viral hepatitis*, 19(8), 554

1  
2  
3  
4  
5  
6  
7  
8  
9  
10  
11  
12  
13  
14  
15  
16  
17  
18  
19  
20  
21  
22  
23  
24  
25  
26  
27  
28  
29  
30  
31  
32  
33  
34  
35  
36  
37  
38  
39  
40  
41  
42  
43  
44  
45  
46  
47  
48  
49  
50  
51  
52  
53  
54  
55  
56  
57  
58  
59  
60

**Ma Somsouk, Deston E Langfield, John M Inadomi, Hal F Jr Yee** (2008//). A cost-identification analysis of screening and surveillance of hepatitis C infection in a prospective cohort of dialysis patients. *Digestive diseases and sciences*, 53(4), 1093

**Magali Bouvier-Alias, Keyur Patel, Harel Dahari, Stephanie Beaucourt, Patrick Larderie, Lawrence Blatt, Christophe Hezode, Gaston Picchio, Daniel Dhumeaux, Avidan U Neumann, John G McHutchison, Jean-Michel Pawlotsky** (2002//). Clinical utility of total HCV core antigen quantification: a new indirect marker of HCV replication. *Hepatology (Baltimore, Md.)*, 36(1), 211

**Magdalena Letowska, Ewa Brojer, Maria Mikulska, Agnieszka Gronowska, Aleksandra Rosiek** (2004//). Hepatitis C core antigen in Polish blood donors. *Transfusion*, 44(7), 1067

**Mahdieh Javaherian, Zarin Sharifnia, Robabeh Taheripanah, Mojgan Bandepour, Mohammad Soleimani, Bahram Kazemi** (2014//). Using recombinant Chlamydia trachomatis OMP2 as antigen in diagnostic ELISA test. *Iranian journal of microbiology*, 6(1), 8

**Mahrukh Akbar Shaheen, Muhammad Idrees** (2015//). Evidence-based consensus on the diagnosis, prevention and management of hepatitis C virus disease. *World journal of hepatology*, 7(3), 616

**Mahsa Alaee, Peyman Rajabi, Zohreh Sharifi, Mohammad Morad Farajollahi** (2014//). Immunoreactivity assessment of hepatitis C virus NS3 protease and NS5A proteins expressed in TOPO cloning system. *Journal of microbiology, immunology, and infection = Wei mian yu gan ran za zhi*, 47(4), 282

**Malika Ait-Goughoulte, Tatsuo Kanda, Keith Meyer, Jan S Ryerse, Ratna B Ray, Ranjit Ray** (2008//). Hepatitis C virus genotype 1a growth and induction of autophagy. *Journal of virology*, 82(5), 2241

**Manuel Fuentes, Cesar Mateo, Ana Rodriguez, Mercedes Casqueiro, Juan C Tercero, Hans H Riese, Roberto Fernandez-Lafuente, Jose M Guisan** (2006//). Detecting minimal traces of DNA using DNA covalently attached to superparamagnetic nanoparticles and direct PCR-ELISA. *Biosensors & bioelectronics*, 21(8), 1574

**Marc-Oliver Riener, Frank Stenner, Heike Liewen, Christopher Soll, Stefan Breitenstein, Bernhard Cornelius Pestalozzi, Panagiotis Samaras, Nicole Probst-Hensch, Claus Hellerbrand, Beat Mullhaupt, Pierre-Alain**

**Clavien, Marcus Bahra, Peter Neuhaus, Peter Wild, Florian Fritzsche, Holger Moch, Wolfram Jochum, Glen Kristiansen** (2009//). Golgi phosphoprotein 2 (GOLPH2) expression in liver tumors and its value as a serum marker in hepatocellular carcinomas. *Hepatology (Baltimore, Md.)*, 49(5), 1602

**Marcel Miedouge, Florence Legrand-Abrevanel, Colette Lalanne, Karine Saune, Jacques Izopet** (2009//). Laboratory evaluation of the UniCel DxI 800 analyser (Beckman Coulter) for detecting HBV and HCV serological markers. *Journal of clinical virology : the official publication of the Pan American Society for Clinical Virology*, 44(2), 134

**Marcia Bessa, Itatiana Ferreira Rodart, Gisele Barreto Lopes Menezes, Theomira Mauadi de Azevedo Carmo, Daniel A Athanzio, Mitermayer G Reis** (2009//). Limited evidence of HCV transmission in stable heterosexual couples from Bahia, Brazil. *The Brazilian journal of infectious diseases : an official publication of the Brazilian Society of Infectious Diseases*, 13(4), 262

**Margret Oethinger, Donald R Mayo, JoAnne Falcone, Pankaj K Barua, Brigitte P Griffith** (2005//). Efficiency of the ortho VITROS assay for detection of hepatitis C virus-specific antibodies increased by elimination of supplemental testing of samples with very low sample-to-cutoff ratios. *Journal of clinical microbiology*, 43(5), 2477

**Maria Cristina Medici, Giuliano Furlini, Anna Rodella, Antonio Fuertes, Alessia Monachetti, Adriana Calderaro, Silvia Galli, Luigina Terlenghi, Magdalena Olivares, Patrizia Bagnarelli, Andrea Costantini, Flora De Conto, Maria Sainz, Claudio Galli, Nino Manca, Maria Paola Landini, Giuseppe Dettori, Carlo Chezzi** (2011//). Hepatitis C virus core antigen: analytical performances, correlation with viremia and potential applications of a quantitative, automated immunoassay. *Journal of clinical virology : the official publication of the Pan American Society for Clinical Virology*, 51(4), 264

**Maria F Pirillo, Luciana Bassani, Elena A P Germinario, Maria Grazia Mancini, Joseph Vyankandondera, Pius Okong, Stefano Vella, Marina Giuliano** (2007//). Seroprevalence of hepatitis B and C viruses among HIV-infected pregnant women in Uganda and Rwanda. *Journal of medical virology*, 79(12), 1797

**Maria G Isagulians, Konstantin Iakimchouk, Natalia V Petrakova, Marina A Yermalovich, Anne Kjerrstrom Zuber, Vladimir I Kashuba, Sergey V Belikov, Soren Andersson, Sergey N Kochetkov, Dennis M Klinman, Britta Wahren** (2004//). Gene immunization may induce

secondary antibodies reacting with DNA. *Vaccine*, 22(11-12), 1576

**Maria G Isagulians, Natalia V Petrakova, Vladislav V Mokhonov, Katja Pokrovskaya, Yulia G Suzdaltzeva, Alexander V Krivonos, Alexei D Zaberezhny, Mansur M Garaev, Valeri D Smirnov, Erik Nordenfelt** (2003//). DNA immunization efficiently targets conserved functional domains of protease and ATPase/helicase of nonstructural 3 protein (NS3) of human hepatitis C virus. *Immunology letters*, 88(1), 1

**Maria J Gomara, Leticia Fernandez, Teresa Perez, Guadalupe Ercilla, Isabel Haro** (2010//). Assessment of synthetic chimeric multiple antigenic peptides for diagnosis of GB virus C infection. *Analytical biochemistry*, 396(1), 51

**Maria J Gomara, Leticia Fernandez, Teresa Perez, Solveig Tenckhoff, Aurora Casanovas, Hans L Tillmann, Isabel Haro** (2011//). Diagnostic value of anti-GBV-C antibodies in HIV-infected patients. *Chemical biology & drug design*, 78(2), 277

**Maria L Lozano, Maria J Candela, Horacio Cano, Isabel Zuazu, Vicente Vicente** (2004//). Detection of free hepatitis C virus core antigen by enzyme-linked immunosorbent assay is not suitable for screening of granulocyte colony-stimulating factor-mobilized hematopoietic progenitor donors. *Transfusion*, 44(12), 1755

**Maria P Dore, Giuseppe Realdi, Daniela Mura, David Y Graham, Antonia R Sepulveda** (2002//). Helicobacter infection in patients with HCV-related chronic hepatitis, cirrhosis, and hepatocellular carcinoma. *Digestive diseases and sciences*, 47(7), 1638

**Marie-Anne Petit, Colette Jolivet-Reynaud, Estelle Peronnet, Yvonne Michal, Christian Trepo** (2003//). Mapping of a conformational epitope shared between E1 and E2 on the serum-derived human hepatitis C virus envelope. *The Journal of biological chemistry*, 278(45), 44385

**Marie-Luise Berres, Beate Schlosser, Thomas Berg, Christian Trautwein, Hermann E Wasmuth** (2012//). Soluble urokinase plasminogen activator receptor is associated with progressive liver fibrosis in hepatitis C infection. *Journal of clinical gastroenterology*, 46(4), 334

**Marion Vermeulen, Nico Lelie, Wendy Sykes, Robert Crookes, Johanna Swanevelder, Lilian Gaggia, Martin Le Roux, Eben Kuun, Sam Gulube, Ravi Reddy** (2009//). Impact of individual-donation nucleic acid testing on risk of

human immunodeficiency virus, hepatitis B virus, and hepatitis C virus transmission by blood transfusion in South Africa. *Transfusion*, 49(6), 1115

**Markus Linnemann, Christoph Geisen, Sabine Menn, Christian Herzberg, Robert Dinsler, Klaus Wielckens** (2002//). Comparison of three dsDNA-ELISAs with regard to their efficiency in the diagnosis of systemic lupus erythematosus. *Clinical laboratory*, 48(1-2), 45

**Martha Minopetrou, Emilia Hadziyannis, Melanie Deutsch, Maria Tampaki, Asimina Georgiadou, Eleni Dimopoulou, Dimitrios Vassilopoulos, John Koskinas** (2013//). Hepatitis C virus (HCV)-related cryoglobulinemia: cryoglobulin type and anti-HCV profile. *Clinical and vaccine immunology : CVI*, 20(5), 698

**Maryam Moini, Mazyar Ziyaeyan, Shapoor Aghaei, Mohammad Mahdi Sagheb, Seyed Alireza Taghavi, Mahsa Moeini, Marzieh Jamalidoust, Laleh Hamidpour** (2013//). Hepatitis C virus (HCV) Infection Rate among Seronegative Hemodialysis Patients Screened by Two Methods; HCV Core Antigen and Polymerase Chain Reaction. *Hepatitis monthly*, 13(6), e9147

**Masahiro Kimura, Ke-ita Tatsumi, Hisato Tada, Yukiko Izumi, Akira Kaneko, Michio Kato, Manabu Masuzawa, Masaki Ikemoto, Yoshiyasu Yabusaki, Yoh Hidaka, Nobuyuki Amino** (2002//). Anti-CYP2D6 antibodies detected by quantitative radioligand assay and relation to antibodies to liver-specific arginase in patients with autoimmune hepatitis. *Clinica chimica acta; international journal of clinical chemistry*, 316(1-2), 155

**Masahito Uemura, Yoshihiro Fujimura, Masanori Matsumoto, Hiromichi Ishizashi, Seiji Kato, Tomomi Matsuyama, Ayami Isonishi, Masatoshi Ishikawa, Masato Yagita, Chie Morioka, Hitoshi Yoshiji, Tatsuhiro Tsujimoto, Norio Kurumatani, Hiroshi Fukui** (2008//). Comprehensive analysis of ADAMTS13 in patients with liver cirrhosis. *Thrombosis and haemostasis*, 99(6), 1019

**Masaya Sugiyama, Tatsuji Kimura, Shigeo Naito, Motokazu Mukaide, Takanori Shinauchi, Masakatsu Ueno, Kiyooki Ito, Kazumoto Murata, Masashi Mizokami** (2012//). Development of specific and quantitative real-time detection PCR and immunoassays for lambda3-interferon. *Hepatology research : the official journal of the Japan Society of Hepatology*, 42(11), 1089

**Matteo Ruggeri, Silvia Coretti, Antonio Gasbarrini, Americo Cicchetti** (2013//).



Economic assessment of an anti-HCV screening program in Italy. *Value in health : the journal of the International Society for Pharmacoeconomics and Outcomes Research*, 16(6), 965

**Maximilian Schoniger-Hekele, Katrin Ramskogler, Doris Hartl, Otto M Lesch, Christian Muller** (2006//). Exclusion of trisialo-transferrin from carbohydrate-deficient transferrin measurement: advantage in patients with chronic liver disease?. *Wiener medizinische Wochenschrift (1946)*, 156(7-8), 216

**Maysaa El-Sayed Zaki, Mohammad Hosam El-Deen Zaghloul, Othman El Sayed** (2006//). Acute sporadic hepatitis E in children: diagnostic relevance of specific immunoglobulin M and immunoglobulin G compared with nested reverse transcriptase PCR. *FEMS immunology and medical microbiology*, 48(1), 16

**Mehnaaz Sultan Khuroo, Naira Sultan Khuroo, Mohammad Sultan Khuroo** (2015//). Diagnostic accuracy of point-of-care tests for hepatitis C virus infection: a systematic review and meta-analysis. *PloS one*, 10(3), e0121450

**Meital Gal-Tanamy, Romy Zemel, Yevgeny Berdichevsky, Larissa Bachmatov, Ran Tur-Kaspa, Itai Benhar** (2005//). HCV NS3 serine protease-neutralizing single-chain antibodies isolated by a novel genetic screen. *Journal of molecular biology*, 347(5), 991

**Mel Krajden, Rainer Ziermann, Asphani Khan, Annie Mak, Kimmy Leung, David Hendricks, Lorraine Comanor** (2002//). Qualitative detection of hepatitis C virus RNA: comparison of analytical sensitivity, clinical performance, and workflow of the Cobas Amplicor HCV test version 2.0 and the HCV RNA transcription-mediated amplification qualitative assay. *Journal of clinical microbiology*, 40(8), 2903

**Michael Eisenhut** (2013//). Neopterin in Diagnosis and Monitoring of Infectious Diseases. *Journal of biomarkers*, 2013(#issue#), 196432

**Michael P Busch, Simone A Glynn, Susan L Stramer, D Michael Strong, Sally Caglioti, David J Wright, Brandee Pappalardo, Steven H Kleinman, NHLBI-REDS NAT Study Group** (2005//). A new strategy for estimating risks of transfusion-transmitted viral infections based on rates of detection of recently infected donors. *Transfusion*, 45(2), 254

**Michela E Burlone, Andrea Cerutti, Rosalba Minisini, Carlo Smirne, Elisa Boccato, Elisa Ceriani, Giovanni Rizzo, Olivia Bargiacchi, Simone Bocchetta, Giuseppa Occhino, Mario**

**Pirisi** (2013//). IL28B polymorphism, blood interferon-alpha concentration, and disease stage of HCV mono-infected and HCV-HIV co-infected patients. *Current HIV research*, 11(1), 50

**Minxin Wang, Xiaojing Zou, Deying Tian, Song Hu, Libin Jiang** (2015//). Role of Dendritic Cell-Specific ICAM-3-Grabbing Nonintegrin on Dendritic Cells in the Recognition of Hepatitis B Virus. *Viral immunology*, 28(6), 331

**Mohamed Hashem, Hanaa El-Karaksy, Mohamed T Shata, Maha Sobhy, Heba Helmy, Suzan El-Naghi, Gehan Galal, Zainab Z Ali, Gamal Esmat, Sayed F Abdelwahab, G Thomas Strickland, Samer S El-Kamary** (2011//). Strong hepatitis C virus (HCV)-specific cell-mediated immune responses in the absence of viremia or antibodies among uninfected siblings of HCV chronically infected children. *The Journal of infectious diseases*, 203(6), 854

**Mohamed R El-Shanshory, Ibrahim A Kabbash, Hanan H Soliman, Hala M Nagy, Said H Abdou** (2013//). Prevalence of hepatitis C infection among children with beta-thalassaemia major in Mid Delta, Egypt: a single centre study. *Transactions of the Royal Society of Tropical Medicine and Hygiene*, 107(4), 224

**Mohammad Ali Assarehzadegan, Mehri Ghafourian Boroujerdnia, Khodamorad Zandian** (2012//). Prevalence of hepatitis B and C infections and HCV genotypes among haemophilia patients in ahvaz, southwest iran. *Iranian Red Crescent medical journal*, 14(8), 470

**Mohammad Javad Zahedi, Sodaif Darvish Moghaddam, Seyed Moayed Alavian, Mahdieh Dalili** (2012//). Seroprevalence of Hepatitis Viruses B, C, D and HIV Infection Among Hemodialysis Patients in Kerman Province, South-East Iran. *Hepatitis monthly*, 12(5), 339

**Mohammad Mehdi Mir-Nasseri, Ashraf Mohammadkhani, Hamid Tavakkoli, Esmaeil Ansari, Hossein Poustchi** (2011//). Incarceration is a major risk factor for blood-borne infection among intravenous drug users: Incarceration and blood borne infection among intravenous drug users. *Hepatitis monthly*, 11(1), 19

**Mostafa K El Awady, Maha A El-Demellawy, Samy B Khalil, Dalia Galal, Said A Goueli** (2002//). Synthetic peptide-based immunoassay as a supplemental test for HCV infection. *Clinica chimica acta; international journal of clinical chemistry*, 325(1-2), 39

**Mostafa K El Awady, Yasmine S El Abd, Hussein A Shoeb, Ashraf A Tabll, Alaa El Din M S Hosny,**

**Reem M El Shenawy, Khaled Atef, Noha G Bader El Din, Mahmoud M Bahgat** (2006//). Circulating viral core and E1 antigen levels as supplemental markers for HCV chronic hepatitis. *Virology journal*, 3(#issue#), 67

**Mt Cabezas-Fernandez, Mi Cabeza-Barrera** (2012//). Introduction of an automated system for the diagnosis and quantification of hepatitis B and hepatitis C viruses. *The open virology journal*, 6(#issue#), 122

**Muhammad Idrees** (2008//). Development of an improved genotyping assay for the detection of hepatitis C virus genotypes and subtypes in Pakistan. *Journal of virological methods*, 150(1-2), 50

**Muhammad Z Yousaf, Muhammad Idrees, Zafar Saleem, Irshad U Rehman, Muhammad Ali** (2011//). Expression of core antigen of HCV genotype 3a and its evaluation as screening agent for HCV infection in Pakistan. *Virology journal*, 8(#issue#), 364

**Myeong Hee Kim, So Young Kang, Woo In Lee** (2013//). Evaluation of a new rapid test kit to detect hepatitis C virus infection. *Journal of virological methods*, 193(2), 379

**N Abuaf, F Lunel, P Giral, E Borotto, S Laperche, R Poupon, P Opolon, J M Hureau, J C Homberg** (1993//). Non-organ specific autoantibodies associated with chronic C virus hepatitis. *Journal of hepatology*, 18(3), 359

**N Agarwal, K Chatterjee, P Coshic, M Borgohain** (2013//). Nucleic acid testing for blood banks: an experience from a tertiary care centre in New Delhi, India. *Transfusion and apheresis science : official journal of the World Apheresis Association : official journal of the European Society for Haemapheresis*, 49(3), 482

**N Berry, A Chakravarti, P Kar, B C Das, Santhanam, M D Mathur** (1998//). Association of hepatitis C virus & hepatitis B virus in chronic liver disease. *The Indian journal of medical research*, 108(#issue#), 255

**N C Tassopoulos, A Hatzakis, I Delladetsima, M G Koutelou, A Todoulos, V Miriagou** (1992//). Role of hepatitis C virus in acute non-A, non-B hepatitis in Greece: a 5-year prospective study. *Gastroenterology*, 102(3), 969

**N Campo, R Brizzolara, N Sinelli, F Torre, R Russo, G Deferrari, A Picciotto** (2000//). TT virus infection in haemodialysis patients. *Nephrology, dialysis, transplantation : official publication of the European Dialysis and Transplant Association* -

*European Renal Association*, 15(11), 1823

**N Choudhury, Sunita Tulsiani, Priti Desai, Ripal Shah, Ankit Mathur, V Harimoorthy** (2011//). Serial follow-up of repeat voluntary blood donors reactive for anti-HCV ELISA. *Asian journal of transfusion science*, 5(1), 26

**N Choudhury, V Ramesh, S Saraswat, S Naik** (1995//). Effectiveness of mandatory transmissible diseases screening in Indian blood donors. *The Indian journal of medical research*, 101(#issue#), 229

**N de Leeuw, W J Melchers, A H Balk, N de Jonge, J M Galama** (1999//). Study on microbial persistence in end-stage idiopathic dilated cardiomyopathy. *Clinical infectious diseases : an official publication of the Infectious Diseases Society of America*, 29(3), 522

**N Kerkar, Y Ma, M Hussain, L Muratori, C Targett, R Williams, F B Bianchi, G Mieli-Vergani, D Vergani** (1999//). A novel assay for detecting antibodies to cytochrome P4502D6, the molecular target of liver kidney microsomal antibody type 1. *Journal of immunological methods*, 223(2), 227

**N L Arnold, B A Slade, M M Jones, M A Popovskiy** (1994//). Donor follow-up of influenza vaccine-related multiple viral enzyme immunoassay reactivity. *Vox sanguinis*, 67(2), 191

**N Penton, A Musacchio, J M Rivera, J Roca, M Ponce, D Rodriguez, A Caballero, Y I Tallo, R E Narciandi** (2003//). Antigenicity of a recombinant NS3 protein representative of ATPase/helicase domain from hepatitis C virus. *Clinical biochemistry*, 36(1), 41

**N S Silverman, M Snyder, R L Hodinka, P McGillen, G Knee** (1995//). Detection of hepatitis C virus antibodies and specific hepatitis C virus ribonucleic acid sequences in cord bloods from a heterogeneous prenatal population. *American journal of obstetrics and gynecology*, 173(5), 1396

**N Yuki, N Hayashi, H Hagiwara, T Takehara, M Oshita, A Kasahara, H Fusamoto, T Kamada** (1993//). Serodiagnosis of chronic hepatitis C in Japan by second-generation recombinant immunoblot assay. *Journal of hepatology*, 17(2), 170

**N Yuki, N Hayashi, H Hagiwara, T Takehara, M Oshita, A Kasahara, H Fusamoto, T Kamada** (1992//). Improved serodiagnosis of chronic hepatitis C in Japan by a second-generation enzyme-linked immunosorbent assay. *Journal of medical virology*, 37(3), 237



**Nada Vasiljevic, Nevena Veljkovic, Tatjana Kosec, Xue-Zhong Ma, Sanja Glisic, Jelena Prljic, Ana Djordjevic Vujcic, Ljiljana Markovic, Donald R Branch** (2011//). A bioinformatics approach to identify natural autoantibodies from healthy blood donors' sera reactive with the HCV NS5A-derived peptide by immunoassay. *Viral immunology*, 24(2), 69

**Naicui Zhai, Xiumei Chi, Tianyang Li, Hongxiao Song, Haijun Li, Xia Jin, Ian Nicholas Crispe, Lishan Su, Junqi Niu, Zhengkun Tu** (2015//). Hepatitis C virus core protein triggers expansion and activation of CD4(+)CD25(+) regulatory T cells in chronic hepatitis C patients. *Cellular & molecular immunology*, 12(6), 743

**Nasar Khan, Muhammad Akmal, Muhammad Hayat, Muhammad Umar, Atta Ullah, Iqbal Ahmed, Kashif Rahim, Sadar Ali, Sulaiman Bahadar, Shamim Saleha** (2014//). Geographic distribution of hepatitis C virus genotypes in pakistan. *Hepatitis monthly*, 14(10), e20299

**Natalie C Weber, Michael E Klepser, Julie M Akers, Donald G Klepser, Alex J Adams** (2016//). Use of CLIA-waived point-of-care tests for infectious diseases in community pharmacies in the United States. *Expert review of molecular diagnostics*, 16(2), 253

**Nawal Abd EL-Baky, Sanaa H Omar, Horeya EL-Badry, El-Rashdy M Redwan** (2008//). Efficacy comparison of gel-based, membrane and glass array techniques to detect human antibodies isotypes among the Egyptian HCV-patients. *Human antibodies*, 17(3-4), 63

**Ndieme Ndongo, Pascale Berthillon, Pierre Pradat, Claude Vieux, Isabelle Bordes, Francoise Berby, Marianne Maynard, Fabien Zoulim, Christian Trepo, Marie-Anne Petit** (2010//). Association of anti-E1E2 antibodies with spontaneous recovery or sustained viral response to therapy in patients infected with hepatitis C virus. *Hepatology (Baltimore, Md.)*, 52(5), 1531

**Neeraj Shah, Anupa Mishra, Dhaval Chauhan, C Vora, N R Shah** (2010//). Study on effectiveness of transfusion program in thalassemia major patients receiving multiple blood transfusions at a transfusion centre in Western India. *Asian journal of transfusion science*, 4(2), 94

**Nelson Acosta-Rivero, Santiago Duenas-Carrera, Liz Alvarez-Lajonchere, Juan Morales-Grillo** (2004//). HCV core protein-expressing DNA vaccine induces a strong class I-binding peptide DTH response in mice. *Biochemical and biophysical research communications*, 314(3), 781

**Nick E Spanakis, George A Garinis, Evangelos C Alexopoulos, George P Patrinos, Panayotis G Menounos, Alexandra Sklavounou, Evangelos N Manolis, Vassilis G Gorgoulis, Dimitrios Valis** (2002//). Cytokine serum levels in patients with chronic HCV infection. *Journal of clinical laboratory analysis*, 16(1), 40

**Nicola Coppola, Raffaella Pisapia, Gilda Tonziello, Addolorata Masiello, Salvatore Martini, Marianonietta Pisaturo, Vincenzo Messina, Caterina Sagnelli, Margherita Macera, Giuseppe Signoriello, Evangelista Sagnelli** (2009//). Improvement in the aetiological diagnosis of acute hepatitis C: a diagnostic protocol based on the anti-HCV-IgM titre and IgG Avidity Index. *Journal of clinical virology : the official publication of the Pan American Society for Clinical Virology*, 46(3), 222

**Nidhi Subhash Chandra, Asha Sharma, Ramesh Roop Rai, Bharti Malhotra** (2012//). Contribution of hepatitis E virus in acute sporadic hepatitis in north western India. *The Indian journal of medical research*, 136(3), 477

**Ning Wang, Xue-Qin Gao, Jin-Xiang Han** (2004//). Simultaneous detection of HBV and HCV by multiplex PCR normalization. *World journal of gastroenterology*, 10(16), 2439

**Noam Yarom, Nurit Dagon, Eilat Shinar, Meir Gorsky** (2007//). Association between hepatitis C virus infection and oral lichen planus in Israeli patients. *The Israel Medical Association journal : IMAJ*, 9(5), 370

**Noemie Lacroix, Helene Barraud, Claudine Gillet, Paolo Di Patrizio, Jean Pierre Bronowicki, Raymund Schwan, Vincent Laprevote** (2016//). [Which place for point-of-care screening tests in the diagnosis of hepatitis C infection among drug users?]. *Presse medicale (Paris, France : 1983)*, 45(4 Pt 1), 431

**Noha Irani-Hakime, Hanady Samaha, Wassim Almawi, Edgar Nasr, Jacques Mokhbat, Maroun Abou Jaoude, Jocelyn Daccache, Elias Rahal** (2003//). Prevalence of hepatitis C virus isolate genotypes from chronically infected Lebanese patients: a hospital-based study. *Le Journal medical libanais. The Lebanese medical journal*, 51(3), 121

**Noor Muhammad, M Ayub Jan** (2005//). Frequency of hepatitis "C" in Buner, NWFP. *Journal of the College of Physicians and Surgeons--Pakistan : JCPSP*, 15(1), 11

**Norma I Rallon, Vincent Soriano, Susanna Naggie, Clara Restrepo, John McHutchison,**

- 1  
2  
3  
4  
5  
6  
7  
8  
9  
10  
11  
12  
13  
14  
15  
16  
17  
18  
19  
20  
21  
22  
23  
24  
25  
26  
27  
28  
29  
30  
31  
32  
33  
34  
35  
36  
37  
38  
39  
40  
41  
42  
43  
44  
45  
46  
47  
48  
49  
50  
51  
52  
53  
54  
55  
56  
57  
58  
59  
60
- Eugenia Vispo, Jose M Benito** (2012//). Impact of IL28B gene polymorphisms on interferon-lambda3 plasma levels during pegylated interferon-alpha/ribavirin therapy for chronic hepatitis C in patients coinfecting with HIV. *The Journal of antimicrobial chemotherapy*, 67(5), 1246
- Nagu T.J.,Bakari M.,Matee M.** (2008//). Hepatitis A, B and C viral co-infections among HIV-infected adults presenting for care and treatment at Muhimbili National Hospital in Dar es Salaam, Tanzania *BMC public health*, 8(#issue#), 416
- Nakagawa T.,Seki T.,Shiro T.,Wakabayashi M.,Itoh T.,Tagawa Y.,Shiozaki Y.,Inoue K.,Okamura A.** (1994//). Usefulness of the high sensitivity PIVKA-II measurement method in diagnosis of hepatocellular carcinoma: A comparison with the conventional method *International Hepatology Communications*, 2(2), 94
- Nakamoto Y.,Kaneko S.,Takizawa H.,Kikumoto Y.,Takano M.,Himeda Y.,Kobayashi K.** (2003//). Analysis of the CD8-positive T cell response in Japanese patients with chronic hepatitis C using HLA-A\*2402 Peptide tetramers *Journal of Medical Virology*, 70(1), 51
- Nakatsuji Y.,Matsumoto A.,Tanaka E.,Ogata H.,Kiyosawa K.** (1992//). Detection of chronic hepatitis C virus infection by four diagnostic systems: First-generation and second-generation enzyme-linked immunosorbent assay, second-generation recombinant immunoblot assay and nested polymerase chain reaction analysis *Hepatology*, 16(2), 300
- Ng Y.-Y.,Lee S.-D.,Wu S.-C.,Liu W.-T.,Chia W.-L.,Huang T.-P.** (1993//). The need for second-generation antihepatitis C virus testing in uremic patients on continuous ambulatory peritoneal dialysis *Peritoneal Dialysis International*, 13(2), 132
- Nielsen M.J.,Kazankov K.,Leeming D.J.,Karsdal M.A.,Krag A.,Barrera F.,McLeod D.,George J.,Gronbaek H.** (2015//). Markers of collagen remodeling detect clinically significant fibrosis in chronic hepatitis C patients *PLoS ONE*, 10(9), no pagination
- Nikolaeva I.A.,Mahboudi F.,Chevalier A.,Khalili G.,Khadem A.,Somova A.V.,Buguruca S.T.,Sidorovich I.G.** (2003//). Evaluation of a New Anti-HIV1/2 ELISA-HIV 1/2 REC Diagnostic Kit Based on E. coli Derived Soluble Recombinant Proteins: Experience of an International Study *Iranian Journal of Medical Sciences*, 28(1), 37
- Noor Haslina M.N.,Khairiah Y.,Zakuan Zainy D.,Shafini M.Y.,Rosnah B.,Marini R.** (2012//). Seroprevalence of hepatitis c virus infection among blood donors in a teaching hospital in northeastern Malaysia *Southeast Asian Journal of Tropical Medicine and Public Health*, 43(3), 668
- O'Brien J.M.,Kruzel K.E.,Wandell M.G.,Vinogradov I.V.,Sheagren J.N.,Frank A.P.** (2001//). Detection of hepatitis C antibody with at-home collection kits using an innovative laboratory algorithm *Infectious Diseases in Clinical Practice*, 10(9), 474
- Okanoue T.,Itoh Y.,Minami M.,Sakamoto S.,Yasui K.,Sakamoto M.,Nishioji K.,Murakami Y.** (1999//). Interferon therapy lowers the rate of progression to hepatocellular carcinoma in chronic hepatitis C but not significantly in an advanced stage: A retrospective study in 1148 patients *Journal of Hepatology*, 30(4), 653
- Okrongly D.** (2004//). The ADVIA Centaur immunoassay system--designed for infectious disease testing *Journal of clinical virology : the official publication of the Pan American Society for Clinical Virology*, 30 Suppl 1(#issue#), S19
- Onuchukwu C.E.,Ojuawo A.,Ernest S.K.** (2013//). Risk factors for hepatitis C virus antibody seropositivity among children with sickle cell Anaemia in Ilorin, Nigeria *African Journal of Clinical and Experimental Microbiology*, 14(3), 127
- Onyekwere C.A.,Hameed L.** (2015//). Hepatitis B and C virus prevalence and association with demographics: report of population screening in Nigeria *Tropical Doctor*, 45(4), 231
- Ooi B.G.,Sinniah M.,Ismail S.,Baharuddin R.** (1996//). Application of the Serodia-HCV particle agglutination for the detection of antibodies to hepatitis C virus *The Malaysian journal of pathology*, 18(2), 89
- O Delpuech, D B Buffello-Le Guillou, E Rubinstein, C Feray, M A Petit** (2001//). The hepatitis C virus (HCV) induces a long-term increase in interleukin-10 production by human CD4+ T cells (H9). *European cytokine network*, 12(1), 69
- O G Shaker, N Hantar, S El-Tahlawi, A El-Tawdi, H El-Hadidi, S Hantar, A El-Refai, R William** (2009//). Detection of myxovirus resistance protein A in lichen planus lesions and its relationship to hepatitis C virus. *The British journal of dermatology*, 160(5), 980
- O Kurauchi, T Furui, A Itakura, H Ishiko, M Sugiyama, Y Ohno, H Ando, A Tanamura, T Ishida, A Nawa** (1993//). Studies on transmission of hepatitis C virus from mother-to-child in the perinatal period. *Archives of gynecology and*

1  
2  
3  
4  
5  
6  
7  
8  
9  
10  
11  
12  
13  
14  
15  
16  
17  
18  
19  
20  
21  
22  
23  
24  
25  
26  
27  
28  
29  
30  
31  
32  
33  
34  
35  
36  
37  
38  
39  
40  
41  
42  
43  
44  
45  
46  
47  
48  
49  
50  
51  
52  
53  
54  
55  
56  
57  
58  
59  
60

*obstetrics*, 253(3), 121

**O Minenkova, N Gargano, A De Tomassi, F Bellintani, A Pucci, P Fortugno, E Fuscaldi, A Pessi, M Rapicetta, M Miceli, P Iudicone, R Cortese, F Felici, P Monaci** (2001//). ADAM-HCV, a new-concept diagnostic assay for antibodies to hepatitis C virus in serum. *European journal of biochemistry / FEBS*, 268(17), 4758

**O O M Daramola, A O George, A O Ogunbiyi** (2002//). Hepatitis C virus and lichen planus in Nigerians: any relationship?. *International journal of dermatology*, 41(4), 217

**O S Khalil, T F Zurek, J Tryba, C F Hanna, R Hollar, C Pepe, K Genger, C Brentz, B Murphy, N Abunimeh** (1991//). Abbott prism: a multichannel heterogeneous chemiluminescence immunoassay analyzer. *Clinical chemistry*, 37(9), 1540

**O V Masalova, S N Atanadze, E I Samokhvalov, N V Petrakova, T I Kalinina, V D Smirnov, Y E Khudyakov, H A Fields, A A Kushch** (1998//). Detection of hepatitis C virus core protein circulating within different virus particle populations. *Journal of medical virology*, 55(1), 1

**Okjin Kim, Sung-Soon Kim, Mi-Sun Park, Soon-Deok Suh, Min-Woo Lee, Ki-Soo Kim, Jae-Deuk Yoon, Joo-Shil Lee** (2003//). Seroprevalence of sexually transmitted viruses in Korean populations including HIV-seropositive individuals. *International journal of STD & AIDS*, 14(1), 46

**Olga Khokhlova, Ara Reizis, Lidya Serebrovskaya, Natalia Gerasimova, Vadim Pokrovskiy** (2014//). Plasmacytoid Dendritic cells (pDCs) in HIV-infected and HIV/HCV-co-infected patients receiving successful treatment. *Journal of the International AIDS Society*, 17(4 Suppl 3), 19642

**Ottavia Spiga, Maria G Padula, Maria Scarselli, Arianna Ciutti, Andrea Bernini, Vincenzo Venditti, Filippo Prischi, Chiara Falciani, Luisa Lozzi, Luisa Bracci, Piero E Valensin, Cinzia Caudai, Neri Niccolai** (2006//). Structurally driven selection of human hepatitis C virus mimotopes. *Antiviral therapy*, 11(7), 917

**P Berthoux, C Dejean, S Cecillon, M Batie, F Berthoux** (1998//). High prevalence of hepatitis G virus (HGV) infection in renal transplantation. *Nephrology, dialysis, transplantation : official publication of the European Dialysis and Transplant Association - European Renal Association*, 13(11), 2909

**P Bjorkman, A Widell, B Veress, H Verbaan, G Hoffmann, S Elmstahl, S Lindgren** (2001//). GB virus C/hepatitis G virus infection in patients

investigated for chronic liver disease and in the general population in southern Sweden. *Scandinavian journal of infectious diseases*, 33(8), 611

**P Bovet, C Yersin, P Herminie, D Lavanchy, P C Frei** (1999//). Decrease in the prevalence of hepatitis B and a low prevalence of hepatitis C virus infections in the general population of the Seychelles. *Bulletin of the World Health Organization*, 77(11), 923

**P Cacoub, N Boukli, P Hausfater, A Garbarg-Chenon, P Ghillani, V Thibault, L Musset, J M Hureau, J C Piette** (1998//). Parvovirus B19 infection, hepatitis C virus infection, and mixed cryoglobulinaemia. *Annals of the rheumatic diseases*, 57(7), 422

**P Coursaget, Y Buisson, N Enogat, R Bercion, J M Baudet, P Delmaire, D Prigent, J Desrame** (1998//). Outbreak of enterically-transmitted hepatitis due to hepatitis A and hepatitis E viruses. *Journal of hepatology*, 28(5), 745

**P Del Porto, G Puntoriero, C Scotta, A Nicosia, E Piccolella** (2000//). High prevalence of hypervariable region 1-specific and -cross-reactive CD4(+) T cells in HCV-infected individuals responsive to IFN-alpha treatment. *Virology*, 269(2), 313

**P Dentico, A Volpe, R Buongiorno, G Fiore, M Carbone, C Manno, G Pastore, O Schiraldi** (1993//). Detection of antibodies to HCV in haemodialysis patients using two second generation ELISA tests. *The Italian journal of gastroenterology*, 25(1), 19

**P Dentico, R Sacco, A Volpe, C Ranieri, S Carabellese, M Carbone, C Casalino, R Buongiorno** (2000//). Hepatitis C virus serotypes in haemodialysis patients in South-East Italy. *Scandinavian journal of infectious diseases*, 32(2), 143

**P Ferroni, G Mascolo, M Zaninetti, D Colzani, F Pregliasco, M Pirisi, F Barbone, V Gasparini** (1993//). Identification of four epitopes in hepatitis C virus core protein. *Journal of clinical microbiology*, 31(6), 1586

**P G McIntyre, E A McCrudden, B C Dow, S O Cameron, M A McMillan, M E Allison, J D Briggs** (1994//). Hepatitis C virus infection in renal dialysis patients in Glasgow. *Nephrology, dialysis, transplantation : official publication of the European Dialysis and Transplant Association - European Renal Association*, 9(3), 291

**P G McIntyre, J Laszlo, K Appleyard, G R Ogden**

(1996//). Modified enzyme immunoassay to detect hepatitis C virus antibodies in oral fluid. *European journal of clinical microbiology & infectious diseases : official publication of the European Society of Clinical Microbiology*, 15(11), 882

**P Gupta, N Jagya, S B Pabhu, H Durgapal, S K Acharya, S K Panda** (2012//). Immunohistochemistry for the diagnosis of hepatitis E virus infection. *Journal of viral hepatitis*, 19(2), e177

**P Lamprecht, O Gutzeit, E Csernok, A Gause, G Longombardo, A L Zignego, W L Gross, C Ferri** (2003//). Prevalence of ANCA in mixed cryoglobulinemia and chronic hepatitis C virus infection. *Clinical and experimental rheumatology*, 21(6 Suppl 32), S89

**P Leal, K Stein, W Rosenberg** (1999//). What is the cost utility of screening for hepatitis C virus (HCV) in intravenous drug users?. *Journal of medical screening*, 6(3), 124

**P Leon, J A Lopez, C Elola, S R Lee, M Calmann, J M Echevarria** (1998//). Use of overlapping synthetic peptides to characterize samples from blood donors with indeterminate results to hepatitis C virus core antigen. *Vox sanguinis*, 75(1), 32

**P Liu, Z X Shi, Y C Zhang, Z C Xu, H S Shu, X Y Zhang** (1997//). A prospective study of a serum-pooling strategy in screening blood donors for antibody to hepatitis C virus. *Transfusion*, 37(7), 732

**P M Kaiguri, F A Okoth, F Lida, N Matsumura, J Tuei, E G Mathenge, A Kasomo, E Ileri, G M Kamati, V O Osidiana, N R Owino, J M Kuiundu, A W Njuguna, P M Tukei, M Yano, T Fujino, H Yatsushashi, M Koga, R Hamada, T Fukui, M Nagatomo** (1996//). Detection of HBV-DNA and HCV-RNA viral sequences by polymerase chain reaction in selected Kenyan samples and the relationship to HBV seromarkers. *African journal of health sciences*, 3(2), 51

**P M Richalet-Secordel, F Poisson, M H Van Regenmortel** (1996//). Uses of biosensor technology in the development of probes for viral diagnosis. *Clinical and diagnostic virology*, 5(2-3), 111

**P Manzini, P L Calvo, M R Brunetto, M Baldi, M L Abate, F Oliveri, F Negro, F Balzola, G Saracco, G Verme** (1993//). Clinical significance of the antibody to the putative core protein of hepatitis C virus in patients with chronic liver disease. *Liver*, 13(4), 222

**P Marcellin, J F Colin, M Martinot-Peignoux, B N Pham, V Lefort, A B Picault, C Degott, S Erlinger, J P Benhamou** (1993//). Hepatitis C virus infection in anti-HIV positive and negative French homosexual men with chronic hepatitis: comparison of second- and third-generation anti-HCV testing. *Liver*, 13(6), 319

**P Muratori, L Muratori, F Cassani, P Terlizzi, M Lenzi, L Rodrigo, F B Bianchi** (2002//). Anti-multiple nuclear dots (anti-MND) and anti-SP100 antibodies in hepatic and rheumatological disorders. *Clinical and experimental immunology*, 127(1), 172

**P N Lelie, H T Cuypers, H W Reesink, C L van der Poel, I Winkel, E Bakker, P J van Exel-Oehlers, D Vallari, J P Allain, L Mimms** (1992//). Patterns of serological markers in transfusion-transmitted hepatitis C virus infection using second-generation HCV assays. *Journal of medical virology*, 37(3), 203

**P Parvaz, E Guichard, P Chevallier, J Ritter, C Trepo, M Sepetjan** (1994//). Hepatitis C: description of a highly sensitive method for clinical detection of viral RNA. *Journal of virological methods*, 47(1-2), 83

**P Schneeberger, H van der Nat, W van Dijk, A van Loon** (1994//). Diagnosis of hepatitis C virus infection using two second-generation enzyme immunoassays with a recombinant immunoblot assay for confirmation. *European journal of clinical microbiology & infectious diseases : official publication of the European Society of Clinical Microbiology*, 13(2), 118

**P Simmonds, J Mellor, A Craxi, J M Sanchez-Tapias, A Alberti, J Prieto, M Colombo, M G Rumi, O Lo Iacano, S Ampurdanes-Mingall, X Forn-Bernhardt, L Chemello, M P Civeira, C Frost, G Dusheiko** (1996//). Epidemiological, clinical and therapeutic associations of hepatitis C types in western European patients. *Journal of hepatology*, 24(5), 517

**P Simmonds, K A Rose, S Graham, S W Chan, F McOmish, B C Dow, E A Follett, P L Yap, H Marsden** (1993//). Mapping of serotype-specific, immunodominant epitopes in the NS-4 region of hepatitis C virus (HCV): use of type-specific peptides to serologically differentiate infections with HCV types 1, 2, and 3. *Journal of clinical microbiology*, 31(6), 1493

**P Tangkijvanich, A Janchai, N Charuruks, P Kullavanijaya, A Theamboonlers, P Hirsch, Y Poovorawan** (2000//). Clinical associations and prognostic significance of serum anti-p53 antibodies in Thai patients with hepatocellular carcinoma. *Asian Pacific journal of allergy and*



*immunology / launched by the Allergy and Immunology Society of Thailand, 18(4), 237*

**P V Holland** (1994//). Overview: diagnostic tests for viral infections transmitted by blood. *Nuclear medicine and biology, 21(3), 407*

**Paraskevi Mina, Sarah P Georgiadou, Christos Rizos, George N Dalekos, Eirini I Rigopoulou** (2010//). Prevalence of occult hepatitis B virus infection in haemodialysis patients from central Greece. *World journal of gastroenterology, 16(2), 225*

**Patrick A Ott, Beate R Berner, Bernhard A Herzog, Robert Guerkov, Nicole L Yonkers, Ivana Durinovic-Bello, Magdalena Tary-Lehmann, Paul V Lehmann, Donald D Anthony** (2004//). CD28 costimulation enhances the sensitivity of the ELISPOT assay for detection of antigen-specific memory effector CD4 and CD8 cell populations in human diseases. *Journal of immunological methods, 285(2), 223*

**Pauline Tremeaux, Sebastien Lhomme, Sabine Chapuy-Regaud, Jean-Marie Peron, Laurent Alric, Nassim Kamar, Jacques Izopet, Florence Abravanel** (2016//). Performance of an antigen assay for diagnosing acute hepatitis E virus genotype 3 infection. *Journal of clinical virology : the official publication of the Pan American Society for Clinical Virology, 79(#issue#), 1*

**Peggy Schwarz, Pavel Strnad, Guido von Figura, Alfred Janetzko, Pierre Krayenbuhl, Guido Adler, Hasan Kulaksiz** (2011//). A novel monoclonal antibody immunoassay for the detection of human serum hepcidin. *Journal of gastroenterology, 46(5), 648*

**Penelopie Koraka, Herve Zeller, Matthias Niedrig, Albert D M E Osterhaus, Jan Groen** (2002//). Reactivity of serum samples from patients with a flavivirus infection measured by immunofluorescence assay and ELISA. *Microbes and infection / Institut Pasteur, 4(12), 1209*

**Peter D Burbelo, Kathryn H Ching, Thomas L Mattson, Jason S Light, Lisa R Bishop, Joseph A Kovacs** (2007//). Rapid antibody quantification and generation of whole proteome antibody response profiles using LIPS (luciferase immunoprecipitation systems). *Biochemical and biophysical research communications, 352(4), 889*

**Philip W Tuke, Paul R Grant, James Waite, Alan D Kitchen, Roger P Eglin, Richard S Tedder** (2008//). Hepatitis C virus window-phase infections: closing the window on hepatitis C virus. *Transfusion, 48(4), 594*

**Prem H Thurairajah, Doha Hegazy, Andrew Demaine, Edward R Kaminski, Matthew E Cramp** (2011//). Loss of virus-specific T-cell responses in HCV exposed uninfected injection drug users with drug rehabilitation. *The Journal of infectious diseases, 203(6), 847*

**Pahuja S., Sharma M., Baitha B., Jain M.** (2007//). Prevalance and trends of markers of hepatitis C virus hepatitis B virus and human immunodeficiency virus in Delhi blood donors: A hospital based study *Japanese Journal of Infectious Diseases, 60(6), 389*

**Pancher M., Desire N., Ngo Y., Akhavan S., Pallier C., Poynard T., Thibault V.** (2015//). Coexistence of circulating HBsAg and anti-HBs antibodies in chronic hepatitis B carriers is not a simple analytical artifact and does not influence HBsAg quantification *Journal of clinical virology : the official publication of the Pan American Society for Clinical Virology, 62(#issue#), 32*

**Papatheodoridis G.V., Delladetsima J.K., Katsoulidou A., Sypsa V., Albrecht M., Michel G., Hatzakis A., Tassopoulos N.C.** (1997//). Significance of IgM anti-HCVcore level in chronic hepatitis C *Journal of Hepatology, 27(1), 36*

**Park Y.M., Kim I.S., Lee C.D., Kim B.S.** (1991//). Seroprevalence of antibody against hepatitis C virus (anti-HCV) in various groups of individuals in Korea *Gastroenterologia Japonica, 26(SUPPL. 3), 159*

**Parvez T., Anwar M.S.** (2002//). Diagnostic value of alpha-fetoprotein in liver cancer *Medical Forum Monthly, 13(1), 19*

**Peoc'h K., Dubel L., Saladin M., Johanet C.** (1998//). Biological evaluation of a new ELISA for the detection of anti- thyroglobulin antibodies (Autozyme(TM) TAB anti-Tg BYK France). Comparison with haemagglutination test *Immuno-Analyse et Biologie Specialisee, 13(6), 366*

**Pereira L.M., Martelli C.M., Moreira R.C., Merchan-Hamman E., Stein A.T., Cardoso M.R., Figueiredo G.M., Montarroyos U.R., Braga C., Turchi M.D., Coral G., Crespo D., Lima M.L., Alencar L.C., Costa M., dos Santos A.A., Ximenes R.A.** (2013//). Prevalence and risk factors of Hepatitis C virus infection in Brazil, 2005 through 2009: a cross-sectional study *BMC infectious diseases, 13(#issue#), no pagination*

**Perniola R., De Rinaldis C., Leo G.** (1999//). Third-generation assays for hepatitis C antibodies: a four-year study of pattern changes in patients with chronic and past infection *Panminerva medica, 41(4), 291*



**Petrik J., Pearson G.J.M., Allain J.-P.** (1997//). High throughput PCR detection of HCV based on semiautomated multisample RNA capture *Journal of Virological Methods*, 64(2), 147

**Pichardo E.M., Olsen S., Brown Jr. R.S.** (2009//). Viral hepatitis and renal failure *Current Hepatitis Reports*, 8(3), 119

**Piro L., Solinas S., Luciani M., Casale A., Bighiani T., Santonocito D., Girelli G.** (2008//). Prospective study of the meaning of indeterminate results of the recombinant immunoblot assay for hepatitis C virus in blood donors *Blood transfusion = Trasfusione del sangue*, 6(2), 107

**Ponamgi S.P.D., Chandra M., Naresh Kumar Y., Rahamathulla S., Narasu L., Habibullah C.M., Khaja M.N.** (2009//). Genotype analysis and assessment of antigenic sensitivity for recombinant HCV proteins by indigenous SIBA for detection of Hepatitis C Virus infection: A comparison with 3rd EIA and RT-PCR *Indian Journal of Biotechnology*, 8(1), 33

**Poovorawan Y., Theamboonlers A., Chumdermpadetsuk S., Thong C.P.** (1994//). Comparative results in detection of HCV antibodies by using a rapid HCV test, ELISA and immunoblot *The Southeast Asian journal of tropical medicine and public health*, 25(4), 647

**Prezzi C., Nuzzo M., Meola A., Delmastro P., Galfre G., Cortese R., Nicosia A., Monaci P.** (1996//). Selection of antigenic and immunogenic mimics of hepatitis C virus using sera from patients *Journal of Immunology*, 156(11), 4504

**Puoti M., Sandrini S., Zaltron S.** (1995//). Impact of hepatitis C virus infection on patients with chronic renal failure *Journal of Nephrology*, 8(6), 291

**Qian K.-P., Natov S.N., Pereira B.J.G., Lau J.Y.-N.** (2000//). Hepatitis C virus mixed genotype infection in patients on haemodialysis *Journal of Viral Hepatitis*, 7(2), 153

**Q Meng, C Wong, A Rangachari, S Tamatsukuri, M Sasaki, E Fiss, L Cheng, T Ramankutty, D Clarke, H Yawata, Y Sakakura, T Hirose, C Impraim** (2001//). Automated multiplex assay system for simultaneous detection of hepatitis B virus DNA, hepatitis C virus RNA, and human immunodeficiency virus type 1 RNA. *Journal of clinical microbiology*, 39(8), 2937

**Qifeng Song, Guozhen Liu, Shaohui Hu, Yan Zhang, Yong Tao, Yuning Han, Haipan Zeng, Wei Huang, Fang Li, Peng Chen, Jianhui Zhu, Chaojun**

**Hu, Shulan Zhang, Yongzhe Li, Heng Zhu, Lin Wu** (2010//). Novel autoimmune hepatitis-specific autoantigens identified using protein microarray technology. *Journal of proteome research*, 9(1), 30

**Qiu-Ju Gao, Dian-Wu Liu, Shi-Yong Zhang, Min Jia, Li-Min Wang, Li-Hong Wu, Shu-Yun Wang, Li-Xin Tong** (2009//). Polymorphisms of some cytokines and chronic hepatitis B and C virus infection. *World journal of gastroenterology*, 15(44), 5610

**Quan-Cheng Kan, Zu-Jiang Yu, Yan-Chang Lei, Lian-Jie Hao, Dong-Liang Yang** (2003//). Lethiferous effects of a recombinant vector carrying thymidine kinase suicide gene on 2.2.15 cells via a self-modulating mechanism. *World journal of gastroenterology*, 9(10), 2216

**Quan-Chu Wang, Zhi-Hua Feng, Yong-Xing Zhou, Qing-He Nie** (2005//). Induction of hepatitis C virus-specific cytotoxic T and B cell responses by dendritic cells expressing a modified antigen targeting receptor. *World journal of gastroenterology*, 11(4), 557

**R A Sinico, M L Ribero, A Fornasieri, P Renoldi, J Zhou, M Fasola, G Portera, G Arrigo, A Gibelli, G D'Amico** (1995//). Hepatitis C virus genotype in patients with essential mixed cryoglobulinaemia. *QJM : monthly journal of the Association of Physicians*, 88(11), 805

**R Cable, S Badon, C Pray, M A Popovsky** (1997//). Limited utility of alanine aminotransferase screening of hepatitis C antibody-screened blood donors. *Transfusion*, 37(2), 206

**R D Aach, C E Stevens, F B Hollinger, J W Mosley, D A Peterson, P E Taylor, R G Johnson, L H Barbosa, G J Nemo** (1991//). Hepatitis C virus infection in post-transfusion hepatitis. An analysis with first- and second-generation assays. *The New England journal of medicine*, 325(19), 1325

**R Firdaus, K Saha, P C Sadhukhan** (2013//). Rapid immunoassay alone is insufficient for the detection of hepatitis C virus infection among high-risk population. *Journal of viral hepatitis*, 20(4), 290

**R Heimer, K Khoshnood, B Jariwala-Freeman, B Duncan, Y Harima** (1996//). Hepatitis in used syringes: the limits of sensitivity of techniques to detect hepatitis B virus (HBV) DNA, hepatitis C virus (HCV) RNA, and antibodies to HBV core and HCV antigens. *The Journal of infectious diseases*, 173(4), 997

**R Koike, T Iizuka, T Watanabe, N Miyasaka** (2001//). The GOR gene product cannot cross-

react with hepatitis C virus in humans. *Clinical and experimental immunology*, 124(3), 429

**R Lesniewski, G Okasinski, R Carrick, C Van Sant, S Desai, R Johnson, J Scheffel, B Moore, I Mushahwar** (1995//). Antibody to hepatitis C virus second envelope (HCV-E2) glycoprotein: a new marker of HCV infection closely associated with viremia. *Journal of medical virology*, 45(4), 415

**R Nagayama, F Tsuda, H Okamoto, Y Wang, T Mitsui, T Tanaka, Y Miyakawa, M Mayumi** (1993//). Genotype dependence of hepatitis C virus antibodies detectable by the first-generation enzyme-linked immunosorbent assay with C100-3 protein. *The Journal of clinical investigation*, 92(3), 1529

**R Panigrahi, S Majumder, M Gooptu, A Biswas, S Datta, P K Chandra, A Banerjee, S Chakrabarti, D Bandopadhyay, B K De, R Chakravarty** (2012//). Occult HBV infection among anti-HBc positive HIV-infected patients in apex referral centre, Eastern India. *Annals of hepatology*, 11(6), 870

**R R Lesniewski, K M Boardway, J M Casey, S M Desai, S G Devare, T K Leung, I K Mushahwar** (1993//). Hypervariable 5'-terminus of hepatitis C virus E2/NS1 encodes antigenically distinct variants. *Journal of medical virology*, 40(2), 150

**R S Ross, S O Viazov, S Hoffmann, M Roggendorf** (2001//). Performance characteristics of a transcription-mediated nucleic acid amplification assay for qualitative detection of hepatitis C virus RNA. *Journal of clinical laboratory analysis*, 15(6), 308

**R S Ross, S Viazov, S Salloum, P Hilgard, G Gerken, M Roggendorf** (2010//). Analytical performance characteristics and clinical utility of a novel assay for total hepatitis C virus core antigen quantification. *Journal of clinical microbiology*, 48(4), 1161

**R S Tedder, P Tuke, N Wallis, M Wright, L Nicholson, P R Grant** (2013//). Therapy-induced clearance of HCV core antigen from plasma predicts an end of treatment viral response. *Journal of viral hepatitis*, 20(1), 65

**R Simo, C Hernandez, J Genesca, R Jordi, J Mesa** (1996//). High prevalence of hepatitis C virus infection in diabetic patients. *Diabetes care*, 19(9), 998

**R Stefan Ross, Oumaima Stambouli, Nico Gruner, Ulrich Marcus, Wei Cai, Weidong Zhang, Ruth Zimmermann, Michael Roggendorf** (2013//). Detection of infections with hepatitis B virus, hepatitis C virus, and human

immunodeficiency virus by analyses of dried blood spots--performance characteristics of the ARCHITECT system and two commercial assays for nucleic acid amplification. *Virology journal*, 10(#issue#), 72

**R Tuveri, C Rothschild, S Pol, D Reijasse, T Persico, C Gazengel, C Brechot, V Thiers** (1997//). Hepatitis C virus genotypes in French haemophiliacs: kinetics and reappraisal of mixed infections. *Journal of medical virology*, 51(1), 36

**R U Khan, C Y Tong, S Bloom, I T Gilmore, C H Toh, P H Bolton-Maggs, N J Beeching, C A Hart** (1997//). Evaluation of two simplified methods for genotyping hepatitis C virus. *Journal of medical virology*, 52(1), 35

**Rafael Antonio Marin y Lopez, Sagrario Romero-Estrella, Lilia Infante-Ramirez, Jorge Saul Mendez-Aquino, Patricia Berron-Ruiz, Norma Angelica Morales-Alfaro, Raul Vivar, Etelvina Carrada, Maria del Refugio Rivera-Rendon, Sergio Arturo Sanchez-Guerrero** (2004//). Hepatitis C seroprevalence in accepted versus deferred blood-donor candidates evaluated by medical history and self-exclusion form. *Transfusion*, 44(9), 1344

**Raj Nath Makroo, Mohit Chowdhry, Aakanksha Bhatia, Minimol Antony** (2015//). Evaluation of the Procleix Ultrio Plus ID NAT assay for detection of HIV 1, HBV and HCV in blood donors. *Asian journal of transfusion science*, 9(1), 29

**Rajesh Kumar, Sonia Gupta, Amarjit Kaur, Manvi Gupta** (2015//). Individual donor-nucleic acid testing for human immunodeficiency virus-1, hepatitis C virus and hepatitis B virus and its role in blood safety. *Asian journal of transfusion science*, 9(2), 199

**Rajesh N Gacche, Sadiq K Al-Mohani** (2012//). Seroprevalence and Risk Factors for Hepatitis C Virus Infection among General Population in Central Region of Yemen. *Hepatitis research and treatment*, 2012(#issue#), 689726

**Rajiv G Tawar, Che C Colpitts, Jorg Timm, Tanja Fehm, Michael Roggendorf, Helga Meisel, Nicolas Meyer, Francois Habersetzer, Francois-Loic Cosset, Thomas Berg, Mirjam B Zeisel, Thomas F Baumert** (2015//). Acute hepatitis C virus infection induces anti-host cell receptor antibodies with virus-neutralizing properties. *Hepatology (Baltimore, Md.)*, 62(3), 726

**Rhoda Ashley Morrow, David Friedrich, Amalia Meier, Lawrence Corey** (2005//). Use of "biokit HSV-2 Rapid Assay" to improve the positive predictive value of Focus HerpeSelect HSV-2 ELISA.

*BMC infectious diseases*, 5(#issue#), 84

**Richard Njouom, Mathurin Cyrille Tejiokem, Marie Claire Endegue Zanga, Regis Pouillot, Ahidjo Ayouba, Christophe Pasquier, Eric Nerrienet** (2006//). A cost-effective algorithm for the diagnosis of Hepatitis C virus infection and prediction of HCV viremia in Cameroon. *Journal of virological methods*, 133(2), 223

**Roger Chou, Elizabeth C Clark, Mark Helfand, U.S. Preventive Services Task Force** (2004//). Screening for hepatitis C virus infection: a review of the evidence for the U.S. Preventive Services Task Force. *Annals of internal medicine*, 140(6), 465

**Rong-Li Piao, David R Brigstock, Jie Zhu, Man-Li Zhang, Run-Ping Gao** (2012//). Clinical significance of connective tissue growth factor in hepatitis B virus-induced hepatic fibrosis. *World journal of gastroenterology*, 18(18), 2280

**Rong-Yuan Huang, Hao-Teng Chang, Chung-Yu Lan, Tun-Wen Pai, Chao-Nan Wu, Chung-Mei Ling, Margaret Dah-Tsyng Chang** (2008//). Development and evaluation of a sensitive enzyme-linked oligonucleotide-sorbent assay for detection of polymerase chain reaction-amplified hepatitis C virus of genotypes 1-6. *Journal of virological methods*, 151(2), 211

**Rongzhen Xu, Xiaoxian Gan, Yongming Fang, Shu Zheng, Qi Dong** (2007//). A simple, rapid, and sensitive integrated protein microarray for simultaneous detection of multiple antigens and antibodies of five human hepatitis viruses (HBV, HCV, HDV, HEV, and HGV). *Analytical biochemistry*, 362(1), 69

**Rosa Divella, Antonio Mazzocca, Cosimo Gadaleta, Giovanni Simone, Angelo Paradiso, Michele Quaranta, Antonella Daniele** (2012//). Influence of plasminogen activator inhibitor-1 (SERPINE1) 4G/5G polymorphism on circulating SERPINE-1 antigen expression in HCC associated with viral infection. *Cancer genomics & proteomics*, 9(4), 193

**Rushna Firdaus, Kallol Saha, Aritra Biswas, Provash Chandra Sadhukhan** (2015//). Current molecular methods for the detection of hepatitis C virus in high risk group population: A systematic review. *World journal of virology*, 4(1), 25

**Radzimski C., Probst C., Teegen B., Rentzsch K., Blocker I.M., Dahnrich C., Schlumberger W., Stocker W., Bogdanos D.P., Komorowski L.** (2013//). Development of a recombinant cell-based indirect immunofluorescence assay for the determination of autoantibodies against soluble

liver antigen in autoimmune hepatitis *Clinical & developmental immunology*, 2013(#issue#), 572815

**Rahman M.U., Khan S.A., Lodhi Y.** (2008//). Unconfirmed reactive screening tests and their impact on donor management *Pakistan Journal of Medical Sciences*, 24(4), 517

**Ramadan R.A., Madkour M.A., El-Nagarr M.M., Abourawash S.N.** (2014//). Serum clusterin as a marker for diagnosing hepatocellular carcinoma *Alexandria Journal of Medicine*, 50(3), 227

**Ratcliff R.M., Chang G., Kok T., Sloots T.P.** (2007//). Molecular diagnosis of medical viruses *Current Issues in Molecular Biology*, 9(2), 87

**Ravera G., Colombi T., Rosso E., Franceschini M.** (1994//). Comparison between two methods for recognition and characterization of anti-HCV (hepatitis C virus) antibodies *Journal of Preventive Medicine and Hygiene*, 35(3-4), 101

**Ray S., Reddy P.J., Choudhary S., Raghu D., Srivastava S.** (2011//). Emerging nanoproteomics approaches for disease biomarker detection: A current perspective *Journal of Proteomics*, 74(12), 2660

**Reesink H.W., van der Poel C.L., Bresters D., Cuypers H.T., Zaaijer H., Lelie P.N.** (1993//). Testing for HCV markers *Developments in biological standardization*, 81(#issue#), 77

**Regev A., Schiff E.R.** (2000//). Viral hepatitis A, B, and C *Clinics in Liver Disease*, 4(1), 47

**Rioche M., Dubreuil P., Kouassi-Samgare A., Akran V., Nordmann P., Pillot J.** (1997//). Frequency of sporadic viral hepatitis E in Cote d'Ivoire based on still questionable serology *Bulletin of the World Health Organization*, 75(4), 349

**Rizvi M., Azam M., Ajmal M.R., Shukla I., Malik A.** (2011//). Prevalence of leptospira in acute hepatitis syndrome and assessment of IL-8 and TNF-alpha level in leptospiral hepatitis *Annals of Tropical Medicine and Parasitology*, 105(7), 499

**Rodriguez-Medina J.R., Carrasquillo E.A., Sarriera J.E., Medina R., Oharriz J.J., Rubio C.E.** (1993//). Hepatitis C viral RNA amplification by the polymerase chain reaction allows detection of false positive HCV ELISAs among patients with non-A, non-B hepatitis *Puerto Rico health sciences journal*, 12(1), 35

**Roth W.K., Seifried E.** (2002//). The German

experience with NAT *Transfusion Medicine*, 12(4), 255

**Rotily M.,Loubiere S.,Nixon J.,Bourliere M.,Halfon P.,Moatti J.P.** (1997//). Should hepatitis C be screened? Socioeconomic analysis of different screening strategies for chronic hepatitis C in French population *Gastroenterologie clinique et biologique*, 21(1 Pt 2), S33

**Rotily M.,Roze S.** (2013//). What is the impact of disease prevalence upon health technology assessment? *Best Practice and Research: Clinical Gastroenterology*, 27(6), 853

**Rowan B.P.,Smith A.,Gleeson D.,Hunt L.P.,Warnes T.W.** (1994//). Hepatitis C virus in autoimmune liver disease in the UK: Aetiological agent or artefact? *Gut*, 35(4), 542

**Ruggieri A.,Harada T.,Matsuura Y.,Miyamura T.** (1997//). Sensitization to Fas-mediated apoptosis by hepatitis C virus core protein *Virology*, 229(1), 68

**Ryff J.-C.** (1997//). Clinical investigation of the immunogenicity of interferon-alpha2a *Journal of Interferon and Cytokine Research*, 17(SUPPL. 1), S29

**Saad Y.,El-Serafy M.,Eldin M.S.,Abdellatif Z.,Khatab H.,Elbaz T.,Elgarem H.** (2013//). New genetic markers for diagnosis of hepatitis C related hepatocellular carcinoma in Egyptian patients *Journal of Gastrointestinal and Liver Diseases*, 22(4), 419

**Sabet L.P.,Taheri T.,Memarnejadian A.,Azad T.M.,Asgari F.,Rahimnia R.,Alavian S.M.,Rafati S.,Rad K.S.** (2014//). Immunogenicity of multi-epitope DNA and peptide vaccine candidates based on core, E2, NS3 and NS5B HCV epitopes in BALB/c mice #journal#, 14(10), no pagination

**Sabry A.,El-Agroudy A.,Sheashaa H.,El-husseini A.,Taha N.M.,Elbaz M.,El-Shahat F.,Sobh M.** (2005//). Histological characterization of HCV-associated glomerulopathy in Egyptian patients *International Urology and Nephrology*, 37(2), 355

**Sakudo A.,Onodera T.** (2012//). Virus capture using anionic polymer-coated magnetic beads (Review) *International Journal of Molecular Medicine*, 30(1), 3

**Sanmarco M.,Soler C.,Christides C.,Raoult D.,Weiller P.J.,Gerolami V.,Bernard D.** (1997//). Prevalence and clinical significance of igg isotype anti-beta2-glycoprotein I antibodies in antiphospholipid syndrome: A comparative study with anticardiolipin antibodies *Journal of Laboratory and Clinical Medicine*, 129(5), 499

**Sansonno D.,Dammacco F.** (1992//). A method for detecting specific anti-C100 protein antibodies of IgM isotype in hepatitis C virus infection *International journal of clinical & laboratory research*, 22(1), 40

**Sansonno D.,Iacobelli A.R.,Cornacchiulo V.,Lauletta G.,Distasi M.A.,Gatti P.,Dammacco F.** (1996//). Immunochemical and biomolecular studies of circulating immune complexes isolated from patients with acute and chronic hepatitis C virus infection *European Journal of Clinical Investigation*, 26(6), 465

**Sazama K.** (1995//). Existing problems in the testing for infectious diseases *Immunological Investigations*, 24(1-2), 131

**Schennach H.,Meyersbach P.,Schonitzer D.,Fuchs D.** (2000//). Additional neopterin screening to improve safety of blood donations *Pteridines*, 11(3), 76

**Schirren C.A.,Jung M.-C.,Gerlach J.T.,Worzfeld T.,Baretton G.,Mamin M.,Hubert Gruener N.,Houghton M.,Pape G.R.** (2000//). Liver-derived hepatitis C virus (HCV)-specific CD4+ T cells recognize multiple HCV epitopes and produce interferon gamma *Hepatology*, 32(3), 597

**Schmeding M.,Kienlein S.,Rocken C.,Neuhaus R.,Neuhaus P.,Heidenhain C.,Neumann U.P.** (2010//). ELISA-based detection of C4d after liver transplantation - A helpful tool for differential diagnosis between acute rejection and HCV-recurrence? *Transplant Immunology*, 23(4), 156

**Schmilovitz-Weiss H.,Levy M.,Thompson N.,Dusheiko G.** (1993//). Viral markers in the treatment of hepatitis B and C *Gut*, 34(SUPPL. 2), S26

**Scognamiglio P.,Accapezzato D.,Casciaro M.A.,Cacciani A.,Artini M.,Bruno G.,Chircu M.L.,Sidney J.,Southwood S.,Abrignani S.,Sette A.,Barnaba V.** (1999//). Presence of effector CD8+ T cells in hepatitis C virus-exposed healthy seronegative donors *Journal of Immunology*, 162(11), 6681

**Seeff L.B.** (1997//). Natural history of hepatitis C *Hepatology*, 26(3 SUPPL.), 21S

**Sekiguchi T.,Umemura T.,Fujimori N.,Shibata S.,Ichikawa Y.,Kimura T.,Joshita S.,Komatsu M.,Matsumoto A.,Tanaka E.,Ota M.** (2015//). Serum cell death biomarkers for prediction of liver fibrosis and poor prognosis in primary biliary cirrhosis *PLoS ONE*, 10(6), no pagination



- 1  
2  
3  
4  
5  
6  
7  
8  
9  
10  
11  
12  
13  
14  
15  
16  
17  
18  
19  
20  
21  
22  
23  
24  
25  
26  
27  
28  
29  
30  
31  
32  
33  
34  
35  
36  
37  
38  
39  
40  
41  
42  
43  
44  
45  
46  
47  
48  
49  
50  
51  
52  
53  
54  
55  
56  
57  
58  
59  
60
- Seremba E.,Ocama P.,Opio C.K.,Kagimu M.,Thomas D.L.,Yuan H.J.,Attar N.,Lee W.M.** (2010//). Poor performance of hepatitis C antibody tests in hospital patients in Uganda *Journal of medical virology*, 82(8), 1371
- Serfaty L.,Nousbaum J.B.,Elghouzzi M.H.,Giral P.,Legendre C.,Poupon R.** (1995//). Prevalence, severity, and risk factors of liver disease in blood donors positive in a second-generation anti-hepatitis C virus screening test *Hepatology*, 21(3), 725
- Setoguchi Y.,Yamamoto K.,Ozaki I.,Wada I.,Hara T.,Fujio N.,Mizuta T.,Sakai T.,Nagumo F.,Tadano J.** (1992//). Overlap and discrepancy between tests for anti-C100, anti-GOR and anti-CP9 in patients with chronic liver disease and inhabitants in Saga, Japan *Gastroenterologia Japonica*, 27(4), 502
- Shah H.A.,Heathcote J.,Feld J.J.** (2013//). A Canadian screening program for hepatitis C: Is now the time? *CMAJ*, 185(15), 1325
- Shameem Banu A.S.,Latha P.,Kaveri K.,Jayakumar S.** (2011//). Serum neopterin estimation as an indicator for safe blood transfusion *Journal of Clinical and Diagnostic Research*, 5(8), 1555
- Sharma B.,Srinivasan R.,Chawla Y.K.,Kapil S.,Saini N.,Singla B.,Chakraborty A.,Kalra N.,Duseja A.,Dhiman R.K.** (2010//). Clinical utility of prothrombin induced by vitamin K absence in the detection of hepatocellular carcinoma in Indian population *Hepatology International*, 4(3), 569
- Sharvadze L.,Nelson K.E.,Imnadze P.,Karchava M.,Tsertsvadze T.** (2008//). Prevalence of HCV and genotypes distribution in general population of Georgia *Georgian medical news*, #volume#(165), 71
- Sherman M.** (2011//). Hepatocellular Carcinoma: Screening and Staging *Clinics in Liver Disease*, 15(2), 323
- Shivkumar S.,Peeling R.,Jafari Y.,Joseph L.,Pai N.P.** (2012//). Accuracy of rapid and point-of-care screening tests for hepatitis C: A systematic review and meta-analysis *Annals of Internal Medicine*, 157(8), 558
- Shopnick R.I.,Bolivar E.,Brettler D.B.** (1996//). Hepatitis C seropositivity in HIV-negative children with severe haemophilia *Haemophilia*, 2(2), 100
- Shrestha A.C.,Ghimre P.,Tiware B.R.,Rajkarnikar M.** (2009//). Transfusion-transmissible infections among blood donors in Kathmandu, Nepal *Journal of Infection in Developing Countries*, 3(10), 794
- Silva L.D.,Rocha A.M.C.,Rocha G.A.,de Moura S.B.,Rocha M.M.N.P.,Dani R.,de Melo F.F.,Guerra J.B.,de Castro L.P.F.,Mendes G.S.,de Abreu Ferrari T.C.,Lima A.S.,Queiroz D.M.M.** (2011//). The presence of *Helicobacter pylori* in the liver depends on the Th1, Th17 and Treg cytokine profile of the patient *Memorias do Instituto Oswaldo Cruz*, 106(6), 748
- Simavli S.,Ozlu T.,Kucukbayrak B.** (2014//). Age specific prevalence of hepatitis B and hepatitis C among pregnant women in the northwestern region of Turkey *Indian Journal of Gastroenterology*, 33(3), 293
- Simon N.** (1995//). Hepatitis C virus infection in hemodialysis *Pathologie-biologie*, 43(8), 735
- Sinniah M.,Ooi B.G.** (1993//). Hepatitis C--the Malaysian story *Singapore medical journal*, 34(2), 132
- Snijdewind I.J.M.,Van Kampen J.J.A.,Fraaij P.L.A.,Van der Ende M.E.,Osterhaus A.D.M.E.,Gruters R.A.** (2012//). Current and future applications of dried blood spots in viral disease management *Antiviral Research*, 93(3), 309
- Soares A.,Cunha R.,Rodrigues F.,Ribeiro H.** (2009//). Smooth muscle autoantibodies with F-actin specificity *Autoimmunity Reviews*, 8(8), 713
- Solgi G.,Ghannad M.S.,Khalilian A.,Majlesi A.,Hajiloo M.** (2015//). Molecular epidemiology of hepatitis C virus and its relation with persistence or clearance of infection in Hamadan, West-Iran *Iranian Journal of Microbiology*, 7(2), 109
- Soliman H.H.,Nagy H.,Kotb N.,Alm El-Din M.A.** (2012//). The role of chemokine CC ligand 20 in patients with liver cirrhosis and hepatocellular carcinoma *International Journal of Biological Markers*, 27(2), 125
- Sookoian S.,Castano G.** (2002//). Evaluation of a third generation anti-HCV assay in predicting viremia in patients with positive HCV antibodies *Annals of hepatology : official journal of the Mexican Association of Hepatology*, 1(4), 179
- Souto F.J.,Fontes C.J.,Martelli C.M.,Turchi M.D.,Martins R.M.,Andrade A.L.** (1999//). Hepatitis C virus prevalence among an immigrant community to the southern Amazon, Brazil *Memorias do Instituto Oswaldo Cruz*, 94(6), 719
- Stevenson D.L.,Harris A.G.,Neal K.R.,Irving W.L.** (1996//). The presence of rheumatoid factor in sera from anti-HCV positive blood donors interferes with the detection of HCV-specific IgM *Journal of Hepatology*, 25(5), 621



1  
2  
3  
4 **Stezinar Levicnik S.,Rahne Potokar U.** (2012//).  
5 Blood donors screening for infection markers in  
6 Slovenia in the period 1991-2010 *Zdravniski*  
7 *Vestnik*, 81(SUPPL.2), 257

8  
9 **Stinton L.M.,Bentow C.,Mahler M.,Norman**  
10 **G.L.,Eksteen B.,Mason A.L.,Kaplan G.G.,Lindkvist**  
11 **B.,Hirschfield G.M.,Milkiewicz P.,Cheung**  
12 **A.,Janssen H.L.,Fritzler M.J.** (2014//). PR3-ANCA:  
13 a promising biomarker in primary sclerosing  
14 cholangitis (PSC) *PLoS one*, 9(11), e112877

15 **Stramer S.L.,Krysztof D.E.,Brodsky J.P.,Fickett**  
16 **T.A.,Reynolds B.,Dodd R.Y.,Kleinman S.H.**  
17 (2013//). Comparative analysis of triplex nucleic  
18 acid test assays in United States blood donors  
19 *Transfusion*, 53(10 PART 2), 2525

20  
21 **Sue M.J.,Yeap S.K.,Omar A.R.,Tan S.W.** (2014//).  
22 Application of PCR-ELISA in molecular diagnosis  
23 *BioMed Research International*, 2014(#issue#), no  
24 pagination

25 **Sutti S.,Vidali M.,Mombello C.,Sartori M.,Albano**  
26 **E.** (2010//). Conformational anti-cytochrome  
27 P4502E1 (CYP2E1) auto-antibodies contribute to  
28 necro-inflammatory injury in chronic hepatitis C  
29 *Journal of Viral Hepatitis*, 17(10), 685

30  
31 **Sutton A.J.,Edmunds W.J.,Sweeting M.J.,Gill O.N.**  
32 (2008  
33 **S Diaz, P Liu, W L Kuhnert, M Healy, A M Prince,**  
34 **M M El-Nageh** (2008//). Development of the  
35 International Consortium for Blood Safety (ICBS)  
36 HCV panels. *Eastern Mediterranean health journal =*  
37 *La revue de sante de la Mediterranee orientale = al-*  
38 *Majallah al-s.ih.h.ayah li-sharq al-mutawassit.*, 14(2),  
39 427

40 **S Dourakis, J Brown, U Kumar, P Karayiannis, P**  
41 **Kernoff, J Chiba, H Ohba, T Miyamura, I Saito, J**  
42 **Monjardino** (1992//). Serological response and  
43 detection of viraemia in acute hepatitis C virus  
44 infection. *Journal of hepatology*, 14(2-3), 370

45 **S E Bassett, D L Thomas, K M Brasky, R E**  
46 **Lanford** (1999//). Viral persistence, antibody to  
47 E1 and E2, and hypervariable region 1 sequence  
48 stability in hepatitis C virus-inoculated  
49 chimpanzees. *Journal of virology*, 73(2), 1118

50 **S Erensoy** (2001//). Diagnosis of hepatitis C virus  
51 (HCV) infection and laboratory monitoring of its  
52 therapy. *Journal of clinical virology : the official*  
53 *publication of the Pan American Society for Clinical*  
54 *Virology*, 21(3), 271

55  
56 **S Garcovich, A Ruggeri, M D'Agostino, F Ardito, C**  
57 **De Simone, G Delogu, G Fadda** (2012//). Clinical  
58 applicability of Quantiferon-TB-Gold testing in

psoriasis patients during long-term anti-TNF-alpha  
treatment: a prospective, observational study.  
*Journal of the European Academy of Dermatology*  
*and Venereology : JEADV*, 26(12), 1572

**S Gharagozloo, J Khoshnoodi, F Shokri** (2001//).  
Hepatitis C virus infection in patients with essential  
mixed cryoglobulinemia, multiple myeloma and  
chronic lymphocytic leukemia. *Pathology oncology*  
*research : POR*, 7(2), 135

**S H Caldwell, X Li, R M Rourk, A Millar, K M**  
**Sosnowski, M Sue, A S Barritt, R W McCallum, E**  
**R Schiff** (1993//). Hepatitis C infection by  
polymerase chain reaction in alcoholics: false-  
positive ELISA results and the influence of infection  
on a clinical prognostic score. *The American journal*  
*of gastroenterology*, 88(7), 1016

**S Horiuchi, W Ampofo, Y Koyanagi, A Yamashita,**  
**M Waki, A Matsumoto, M Yamamoto, N**  
**Yamamoto** (1998//). High-level production of  
alternatively spliced soluble interleukin-6 receptor  
in serum of patients with adult T-cell  
leukaemia/HTLV-I-associated myelopathy.  
*Immunology*, 95(3), 360

**S I Strasser, B C Smith, K J Watson, P J Coghlan, S**  
**A Locarnini, P V Desmond** (1995//). Evaluation of  
blood donors with equivocal hepatitis C serological  
results. *The Medical journal of Australia*, 162(9),  
459

**S Katiyar, B C Dash, V Thakur, R C Gupta, S K**  
**Sarin, B C Das** (2000//). P53 tumor suppressor  
gene mutations in hepatocellular carcinoma  
patients in India. *Cancer*, 88(7), 1565

**S Kawano, M Tanaka, S Fujiyama, S Sato, Y**  
**Taura, M Goto, H Chikazawa, T Sato** (1994//).  
Clinical usefulness of an assay for hepatitis C virus  
core in the diagnosis of non-A, non-B hepatitis and  
monitoring of the response to interferon therapy.  
*Journal of gastroenterology and hepatology*, 9(3),  
217

**S Kawano, S Fujiyama, S Sato, K Yoshida, J**  
**Shibata, H Murata, T Kawahara, K Mizuno, S**  
**Nonaka, T Sato** (1991//). Detection of antibodies  
to hepatitis C virus (anti-HCV) in patients with  
various liver diseases, by an ELISA (KCL-163) test  
consisting of synthetic peptides corresponding to  
an HCV genome. *Gastroenterologia Japonica*, 26  
Suppl 3(#issue#), 218

**S Kawano, S Fujiyama, S Sato, M Tanaka, M Goto,**  
**Y Taura, T Sato, T Kawahara, K Mizuno, S**  
**Nonaka** (1992//). Clinical evaluation of three anti-  
HCV ELISAs in patients with various liver diseases.  
*Digestive diseases and sciences*, 37(8), 1268

- 1  
2  
3  
4  
5  
6  
7  
8  
9  
10  
11  
12  
13  
14  
15  
16  
17  
18  
19  
20  
21  
22  
23  
24  
25  
26  
27  
28  
29  
30  
31  
32  
33  
34  
35  
36  
37  
38  
39  
40  
41  
42  
43  
44  
45  
46  
47  
48  
49  
50  
51  
52  
53  
54  
55  
56  
57  
58  
59  
60
- S Kumar, R K Ratho, Y K Chawla, A Chakraborti** (2006//). Virological investigation of a hepatitis E epidemic in North India. *Singapore medical journal*, 47(9), 769
- S Lou, X Qiu, G Tegmeier, S Leitz, J Brackett, K Cousineau, A Varma, H Seballos, S Kundu, S Kuemmerle, J C Hunt** (1997//). Immunoassays to study prevalence of antibody against GB virus C in blood donors. *Journal of virological methods*, 68(1), 45
- S M Cooper, G Kirtschig, K J M Jeffery, F Wojnarowska** (2004//). No association between hepatitis B or C viruses and vulval lichen planus in a UK population. *BJOG : an international journal of obstetrics and gynaecology*, 111(3), 271
- S Magrin, A Craxi, C Fabiano, G Fiorentino, L Marino, P Almasio, G B Pinzello, U Palazzo, M Vitale, A Maggio** (1992//). Serum hepatitis C virus (HCV)-RNA and response to alpha-interferon in anti-HCV positive chronic hepatitis. *Journal of medical virology*, 38(3), 200
- S Mishiro, Y Hoshi, K Takeda, A Yoshikawa, T Gotanda, K Takahashi, Y Akahane, H Yoshizawa, H Okamoto, F Tsuda** (1990//). Non-A, non-B hepatitis specific antibodies directed at host-derived epitope: implication for an autoimmune process. *Lancet (London, England)*, 336(8728), 1400
- S N Natov, J Y Lau, B A Bouthot, B V Murthy, R Ruthazer, C H Schmid, A S Levey, B J Pereira** (1998//). Serologic and virologic profiles of hepatitis C infection in renal transplant candidates. New England Organ Bank Hepatitis C Study Group. *American journal of kidney diseases : the official journal of the National Kidney Foundation*, 31(6), 920
- S Nagata, H Ishii, H Yokoyama, S Kato, S Moriya, K Maruyama, H Takahashi, M Tsuchiya** (1993//). Influence of HCV infection and its subtypes on clinical course of alcoholic liver disease. *Gastroenterologia Japonica*, 28 Suppl 5(#issue#), 91
- S Nedjar, R M Biswas, I K Hewlett** (1991//). Co-amplification of specific sequences of HCV and HIV-1 genomes by using the polymerase chain reaction assay: a potential tool for the simultaneous detection of HCV and HIV-1. *Journal of virological methods*, 35(3), 297
- S Nicholson, D E Leslie, T Efandis, C K Fairley, I D Gust** (1991//). Hepatitis C antibody testing: problems associated with non-specific binding. *Journal of virological methods*, 33(3), 311
- S Nishiguchi, T Kuroki, T Ueda, K Fukuda, T Takeda, S Nakajima, S Shiomi, K Kobayashi, S Otani, N Hayashi** (1992//). Detection of hepatitis C virus antibody in the absence of viral RNA in patients with autoimmune hepatitis. *Annals of internal medicine*, 116(1), 21
- S O Cameron, K S Wilson, T Good, J McMenamin, B McCarron, A Pithie, R Fox** (1999//). Detection of antibodies against hepatitis C virus in saliva: a marker of viral replication. *Journal of viral hepatitis*, 6(2), 141
- S P D Ponamgi, S Rahamathulla, Y N Kumar, M Chandra, N Lakshmi, C M Habibullah, M N Khaja** (2009//). Prevalence of hepatitis C virus (HCV) coinfection in HIV infected individuals in south India and characterization of HCV genotypes. *Indian journal of medical microbiology*, 27(1), 12
- S P Parker, W D Cubitt, A E Ades** (1997//). A method for the detection and confirmation of antibodies to hepatitis C virus in dried blood spots. *Journal of virological methods*, 68(2), 199
- S Pol, V Thiers, F Driss, A Devergie, P Berthelot, C Brechot, E Gluckman** (1993//). Lack of evidence for a role of HCV in hepatitis-associated aplastic anaemia. *British journal of haematology*, 85(4), 808
- S Pol, V Thiers, J B Nausbaum, C Legendre, P Berthelot, H Kreis, C Brechot** (1995//). The changing relative prevalence of hepatitis C virus genotypes: evidence in hemodialyzed patients and kidney recipients. *Gastroenterology*, 108(2), 581
- S Polywka, R Laufs** (1991//). Hepatitis C virus antibodies among different groups at risk and patients with suspected non-A, non-B hepatitis. *Infection*, 19(2), 81
- S R Lee, G D Yearwood, G B Guillon, L A Kurtz, M Fischl, T Friel, C A Berne, K W Kardos** (2010//). Evaluation of a rapid, point-of-care test device for the diagnosis of hepatitis C infection. *Journal of clinical virology : the official publication of the Pan American Society for Clinical Virology*, 48(1), 15
- S Ramalingam, P G Babu, G Chandy, G Kurien, P Thomas, G Sridharan** (1998//). Importance of RT-PCR for detection of hepatitis C virus among different patient groups. *The Indian journal of medical research*, 108(#issue#), 85
- S Ramia** (1995//). Hepatitis C virus: molecular virology and its implications for serologic diagnosis. *Saudi journal of kidney diseases and transplantation : an official publication of the Saudi Center for Organ Transplantation, Saudi Arabia*, 6(2), 190

- 1  
2  
3  
4  
5  
6  
7  
8  
9  
10  
11  
12  
13  
14  
15  
16  
17  
18  
19  
20  
21  
22  
23  
24  
25  
26  
27  
28  
29  
30  
31  
32  
33  
34  
35  
36  
37  
38  
39  
40  
41  
42  
43  
44  
45  
46  
47  
48  
49  
50  
51  
52  
53  
54  
55  
56  
57  
58  
59  
60
- S Ramia, F Ramlawi, M Kanaan, S Klayme, R Naman** (2005//). Frequency and significance of antibodies against hepatitis B core (anti-HBc) antigen as the only serological marker for hepatitis B infection in Lebanese blood donors. *Epidemiology and infection*, 133(4), 695
- S S Bernvil, V J Andrews, A A Kariem** (1991//). Hepatitis C antibody prevalence in Saudi Arabian blood donor population. *Annals of Saudi medicine*, 11(5), 563
- S S Bernvil, V J Andrews, F Sasich** (1994//). Second-generation anti-HCV screening in a Saudi Arabian donor population. *Vox sanguinis*, 66(1), 33
- S Saab, M Brezina, G Gitnick, P Martin, H F Jr Yee** (2001//). Hepatitis C screening strategies in hemodialysis patients. *American journal of kidney diseases : the official journal of the National Kidney Foundation*, 38(1), 91
- S Saitoh, K Ikeda, I Koida, A Tsubota, Y Arase, K Chayama, H Kumada** (1994//). Serum des-gamma-carboxyprothrombin concentration determined by the avidin-biotin complex method in small hepatocellular carcinomas. *Cancer*, 74(11), 2918
- S Saraswat, K Banerjee, N Chaudhury, T Mahant, P Khandekar, R K Gupta, S Naik** (1996//). Post-transfusion hepatitis type B following multiple transfusions of HBsAg-negative blood. *Journal of hepatology*, 25(5), 639
- S Sato, S Fujiyama, M Tanaka, K Yamasaki, I Kuramoto, S Kawano, T Sato, K Mizuno, S Nonaka** (1994//). Coinfection of hepatitis C virus in patients with chronic hepatitis B infection. *Journal of hepatology*, 21(2), 159
- S Sato, S Fujiyama, S Kawano, T Sato, K Mizuno, S Nonaka** (1991//). Evaluation of the KCL-163 ELISA test for detecting antibodies against hepatitis C virus in patients with non-A, non-B chronic hepatitis. *Gastroenterologia Japonica*, 26 Suppl 3(#issue#), 216
- S Slavenburg, F M Verduyn-Lunel, J T Hermesen, W J G Melchers, R H M te Morsche, J P H Drenth** (2008//). Prevalence of hepatitis C in the general population in the Netherlands. *The Netherlands journal of medicine*, 66(1), 13
- S Songsivilai, T Dharakul, D Kanistanon** (1996//). Hepatitis C virus genotypes in patients with hepatocellular carcinoma and cholangiocarcinoma in Thailand. *Transactions of the Royal Society of Tropical Medicine and Hygiene*, 90(5), 505
- S Tisminetzky, M Gerotto, P Pontisso, L Chemello, L E Prescott, K A Rose, F Baralle, P Simmonds, A Alberti** (1995//). Comparison of genotyping and serotyping methods for the identification of hepatitis C virus types. *Journal of virological methods*, 55(3), 303
- S U Mehta, S Mishiro, K Sekiguchi, T Leung, G J Dawson, L M Pandy, D A Peterson, S G Devare** (1992//). Immune response to GOR, a marker for non-A, non-B hepatitis and its correlation with hepatitis C virus infection. *Journal of clinical immunology*, 12(3), 178
- S Viazov, A Zibert, K Ramakrishnan, A Widell, A Cavicchini, E Schreier, M Roggendorf** (1994//). Typing of hepatitis C virus isolates by DNA enzyme immunoassay. *Journal of virological methods*, 48(1), 81
- S W Chan, J M Bye, P Jackson, J P Allain** (1996//). Human recombinant antibodies specific for hepatitis C virus core and envelope E2 peptides from an immune phage display library. *The Journal of general virology*, 77 ( Pt 10)(#issue#), 2531
- Sabahattin Ocak, Hasan Kaya, Meryem Cetin, Edip Gali, Muge Ozturk** (2006//). Seroprevalence of hepatitis B and hepatitis C in patients with thalassemia and sickle cell anemia in a long-term follow-up. *Archives of medical research*, 37(7), 895
- Said H S Al Dhahry, Shahina Daar, Jameel C Nograles, Situsekara M W W B Rajapakse, Fadhila S S Al Toqi, Geraldine Z Kaminski** (2002//). Fluctuating antibody response in a cohort of hepatitis C patients. *Journal for scientific research. Medical sciences / Sultan Qaboos University*, 4(1-2), 33
- Salwa Bdour** (2002//). Hepatitis C virus infection in Jordanian haemodialysis units: serological diagnosis and genotyping. *Journal of medical microbiology*, 51(8), 700
- Samantha J Shepherd, Joy Kean, Sharon J Hutchinson, Sheila O Cameron, David J Goldberg, William F Carman, Rory N Gunson, Celia Aitken** (2013//). A hepatitis C avidity test for determining recent and past infections in both plasma and dried blood spots. *Journal of clinical virology : the official publication of the Pan American Society for Clinical Virology*, 57(1), 29
- Sami A Gabr, Ahmad H Alghadir** (2014//). Prediction of fibrosis in hepatitis C patients: assessment using hydroxyproline and oxidative stress biomarkers. *Virusdisease*, 25(1), 91
- Samir El-Masry, Mahmoud Lotfy, Mohamed El-Shahat, Gamal Badra** (2006//). Serum laminin

assayed by Slot-Blot-ELISA in patients with combined viral hepatitis C and schistosomiasis. *Clinical biochemistry*, 39(6), 652

**Sandra Beinhardt, Judith H Aberle, Michael Strasser, Emina Dulic-Lakovic, Andreas Maieron, Anna Kreil, Karoline Rutter, Albert F Staettermayer, Christian Datz, Thomas M Scherzer, Robert Strassl, Martin Bischof, Rudolf Stauber, Gerd Bodlaj, Hermann Laferl, Heidemarie Holzmann, Petra Steindl-Munda, Peter Ferenci, Harald Hofer** (2012//). Serum level of IP-10 increases predictive value of IL28B polymorphisms for spontaneous clearance of acute HCV infection. *Gastroenterology*, 142(1), 78

**Sandrine Loubiere, Jean-Paul Moatti** (2003//). Cost-effectiveness of hepatitis C screening of blood donations. *Expert review of pharmacoeconomics & outcomes research*, 3(1), 47

**Sangeeta Pahuja, Santosh Kumar Gupta, Mukta Pujani, Manjula Jain** (2014//). Treponema pallidum hemagglutination assay seroreactivity among healthy Indian donors and its association with other transfusion transmitted diseases. *Asian journal of transfusion science*, 8(2), 109

**Sangeeta Pathak, M Chandrashekhar** (2013//). Transfusion transmittable infections - Seroprevalence among blood donors in a tertiary care hospital of Delhi. *Asian journal of transfusion science*, 7(2), 116

**Sansan Lin, Phillip Arcangel, Angelica Medina-Selby, Doris Coit, Philip Ng, Steve Nguyen, Colin McCoin, Alex Gyenes, Celine Hu, Laura Tandeske, Bruce Phelps, David Chien** (2005//). Design of novel conformational and genotype-specific antigens for improving sensitivity of immunoassays for hepatitis C virus-specific antibodies. *Journal of clinical microbiology*, 43(8), 3917

**Sara Mohammadzadeh, Farzin Roohvand, Soheila Ajdary, Parastoo Ehsani, Ali Hatef Salmanian** (2015//). Heterologous Expression of Hepatitis C Virus Core Protein in Oil Seeds of Brassica napus L. *Jundishapur journal of microbiology*, 8(11), e25462

**Sayed F Abdelwahab, Zainab Zakaria, Maha Sobhy, Eman Rewisha, Mohamed A Mahmoud, Mahmoud A Amer, Mariarosaria Del Sorbo, Stefania Capone, Alfredo Nicosia, Antonella Folgore, Mohamed Hashem, Samer S El-Kamary** (2012//). Hepatitis C virus-multispecific T-cell responses without viremia or seroconversion among Egyptian health care workers at high risk of infection. *Clinical and vaccine immunology : CVI*, 19(5), 780

**Sayeh Ezzikouri, Kiminori Kimura, Hajime Sunagozaka, Shuichi Kaneko, Kazuaki Inoue, Tomohiro Nishimura, Tsunekazu Hishima, Michinori Kohara, Kyoko Tsukiyama-Kohara** (2015//). Serum DHCR24 Auto-antibody as a new Biomarker for Progression of Hepatitis C. *EBioMedicine*, 2(6), 604

**Semra Paydas, Melek Ergin, Kahraman Tanriverdi, Sinan Yavuz, Umut Disel, Nil Banu Kilic, Seyda Erdogan, Berksoy Sahin, Ilhan Tuncer, Refik Burgut** (2004//). Detection of hepatitis C virus RNA in paraffin-embedded tissues from patients with non-Hodgkin's lymphoma. *American journal of hematology*, 76(3), 252

**Seong-Jun Kim, Jung-Hee Kim, Yeon-Gu Kim, Ho-Soo Lim, Jong-Won Oh** (2004//). Protein kinase C-related kinase 2 regulates hepatitis C virus RNA polymerase function by phosphorylation. *The Journal of biological chemistry*, 279(48), 50031

**Sergei Viazov, Stefan S Ross, Karen K Kyuregyan, Joerg Timm, Christoph Neumann-Haefelin, Olga V Isaeva, Oksana E Popova, Petr N Dmitriev, Fathia El Sharkawi, Robert Thimme, Michail I Michailov, Michael Roggendorf** (2010//). Hepatitis C virus recombinants are rare even among intravenous drug users. *Journal of medical virology*, 82(2), 232

**Sergey A Shiryaev, Ilian A Radichev, Boris I Ratnikov, Alexander E Aleshin, Katarzyna Gawlik, Boguslaw Stec, Christian Frisch, Achim Knappik, Alex Y Strongin** (2010//). Isolation and characterization of selective and potent human Fab inhibitors directed to the active-site region of the two-component NS2B-NS3 proteinase of West Nile virus. *The Biochemical journal*, 427(3), 369

**Sergio Batista-dos-Santos, Milene Raiol, Sidney Santos, Maristela G Cunha, Andrea Ribeiro-dos-Santos** (2012//). Real-time PCR diagnosis of Plasmodium vivax among blood donors. *Malaria journal*, 11(#issue#), 345

**Seung Gyu Yun, Jin Woo Jang, Jong Han Lee, Chae Seung Lim, Jinhong Kim, Yeona Ki, Minjoung Jo, Soyoun Kim** (2015//). Evaluation of Novel Multiplex Antibody Kit for Human Immunodeficiency Virus 1/2 and Hepatitis C Virus Using Sol-Gel Based Microarray. *BioMed research international*, 2015(#issue#), 837296

**Shahab Saqib, Muhammad Zuhaib Khan, Sayed Irtiza Hussain Shah Gardyzi, Javaria Qazi** (2016//). Prevalence and epidemiology of blood borne pathogens in health care workers of Rawalpindi/Islamabad. *JPM. The Journal of the Pakistan Medical Association*, 66(2), 170



**Shahila Parween, Pradip Nahar** (2016//). Ultraminaturized assay for rapid, low cost detection and quantification of clinical and biochemical samples. *Biomedical microdevices*, 18(2), 33

**Shali Shi, Xiaoyan Yu, Yimin Gao, Binbin Xue, Xinjiao Wu, Xiaohong Wang, Darong Yang, Haizhen Zhu** (2014//). Inhibition of hepatitis C virus production by aptamers against the core protein. *Journal of virology*, 88(4), 1990

**Shaoxia Xu, Qiaofeng Wang, Weihong Zhang, Zhifeng Qiu, Jingtao Cui, Wenjuan Yan, Anping Ni** (2015//). Seroprevalence of the Hepatitis B, Hepatitis C, and Human Immunodeficiency Viruses and *Treponema pallidum* at the Beijing General Hospital from 2010 to 2014: A Cross-Sectional Study. *PLoS one*, 10(10), e0140854

**Shaoyong Li, Lianne E M Vriend, Imad A Nasser, Yury Popov, Nezam H Afdhal, Margaret J Koziel, Detlef Schuppan, Mark A Exley, Nadia Alatrakchi** (2012//). Hepatitis C virus-specific T-cell-derived transforming growth factor beta is associated with slow hepatic fibrogenesis. *Hepatology (Baltimore, Md.)*, 56(6), 2094

**Shazia Rafique, Muhammad Idrees, Amjad Ali, Muhammad Iqbal** (2014//). Studies on the role of neutralizing antibodies against envelope genes in resolving HCV pseudo-particles infection. *Molecular biology reports*, 41(6), 3945

**Shiji Wu, Yanling Liu, Liming Cheng, Botao Yin, Jing Peng, Ziyong Sun** (2011//). Clinical evaluation of the signal-to-cutoff ratios of hepatitis C virus antibody screening tests used in China. *Journal of medical virology*, 83(11), 1930

**Shilpee Choudhry, V G Ramachandran, Shukla Das, S N Bhattacharya, Narendra Singh Mogha** (2009//). Serological profile of HSV-2 in patients attending STI clinic: evaluation of diagnostic utility of HSV-2 IgM detection. *Indian journal of pathology & microbiology*, 52(3), 353

**Shinobu Kitazume, Ritsuko Oka, Kazuko Ogawa, Satoshi Futakawa, Yoshiaki Hagiwara, Hajime Takikawa, Michio Kato, Akinori Kasahara, Eiji Miyoshi, Naoyuki Taniguchi, Yasuhiro Hashimoto** (2009//). Molecular insights into beta-galactoside alpha2,6-sialyltransferase secretion in vivo. *Glycobiology*, 19(5), 479

**Shirley Owusu-Ofori, Jillian Temple, Francis Sarkodie, Margaret Anokwa, Daniel Candotti, Jean-Pierre Allain** (2005//). Predonation screening of blood donors with rapid tests: implementation and efficacy of a novel approach to

blood safety in resource-poor settings. *Transfusion*, 45(2), 133

**Shivaram Chandrashekar** (2014//). Half a decade of mini-pool nucleic acid testing: Cost-effective way for improving blood safety in India. *Asian journal of transfusion science*, 8(1), 35

**Shuang-Yuan Kuang, Suree Lekawanvijit, Niwat Maneekarn, Satawat Thongsawat, Kimberly Brodovicz, Kenrad Nelson, John D Groopman** (2005//). Hepatitis B 1762T/1764A mutations, hepatitis C infection, and codon 249 p53 mutations in hepatocellular carcinomas from Thailand. *Cancer epidemiology, biomarkers & prevention : a publication of the American Association for Cancer Research, cosponsored by the American Society of Preventive Oncology*, 14(2), 380

**Silvia de Sanjose, Yolanda Benavente, Claire M Vajdic, Eric A Engels, Lindsay M Morton, Paige Bracci, John J Spinelli, Tongzhang Zheng, Yawei Zhang, Silvia Franceschi, Renato Talamini, Elizabeth A Holly, Andrew E Grulich, James R Cerhan, Patricia Hartge, Wendy Cozen, Paolo Boffetta, Paul Brennan, Marc Maynadie, Pierluigi Cocco, Ramon Bosch, Lenka Foretova, Anthony Staines, Nikolaus Becker, Alexandra Nieters** (2008//). Hepatitis C and non-Hodgkin lymphoma among 4784 cases and 6269 controls from the International Lymphoma Epidemiology Consortium. *Clinical gastroenterology and hepatology : the official clinical practice journal of the American Gastroenterological Association*, 6(4), 451

**Silvia Garazzino, Carmelina Calitri, Antonella Versace, Alda Alfarano, Carlo Scolfaro, Chiara Bertaina, Simona Vatrano, Federica Mignolo, Francesco Licciardi, Clara Gabiano, Pier-Angelo Tovo** (2014//). Natural history of vertically acquired HCV infection and associated autoimmune phenomena. *European journal of pediatrics*, 173(8), 1025

**Soheir Abdel Latif Eissa, Lobna Mostafa Abdel Meguid, Samir Morqus Ebeid, Randa Mohamed Abou Elfetouh, Gamal Mohamed Abdel Moneim** (2007//). National Cancer Institute Experience in Healthy Egyptian Blood Donors as Regards Blood Group Frequencies and Seroprevalence of Hepatitis B Virus, Hepatitis C Virus&HIV: 10 Year Evaluation. *Journal of the Egyptian National Cancer Institute*, 19(1), 71

**Soheir S Mansy, Mona M Nosseir, Mona A Zoheiry, Moetaz H Hassanein, Mohammed F Guda, May M Othman, Hoda AbuTalab** (2014//). Value of reelin for assessing hepatic fibrogenesis in a group of Egyptian HCV infected patients. *Clinical chemistry and laboratory medicine : CCLM / FESCC*,



52(9), 1319

**Stefan Kraus, Michael Kleines, Jorg Albers, Lars Blohm, Gundula Piechotta, Christiane Puttmann, Stefan Barth, Jorg Nahring, Eric Nebling** (2011//). Quantitative measurement of human anti-HCV Core immunoglobulins on an electrical biochip platform. *Biosensors & bioelectronics*, 26(5), 1895

**Stella Gabeta, Gary L Norman, Christos Liaskos, Panagiotis A Papamichalis, Theodoros Zografos, Athanasios Garagounis, Eirini I Rigopoulou, George N Dalekos** (2007//). Diagnostic relevance and clinical significance of the new enhanced performance M2 (MIT3) ELISA for the detection of IgA and IgG antimitochondrial antibodies in primary biliary cirrhosis. *Journal of clinical immunology*, 27(4), 378

**Stephane Chevaliez, Alexandre Soulier, Lila Poiteau, Magali Bouvier-Alias, Jean-Michel Pawlotsky** (2014//). Clinical utility of hepatitis C virus core antigen quantification in patients with chronic hepatitis C. *Journal of clinical virology : the official publication of the Pan American Society for Clinical Virology*, 61(1), 145

**Stephane Chevaliez, Jean-Michel Pawlotsky** (2012//). Virology of hepatitis C virus infection. *Best practice & research. Clinical gastroenterology*, 26(4), 381

**Stephane Chevaliez, Jean-Michel Pawlotsky** (2005//). [Screening and diagnosis of hepatitis B and C]. *La Revue du praticien*, 55(6), 615

**Stephen R Lee, Keith W Kardos, Eugene Schiff, Cheryl A Berne, Karam Mounzer, Alpha T Banks, Harvey A Tatum, Timothy J Friel, Michael P Demicco, William M Lee, Scott E Eder, Alexander Monto, Graham D Yearwood, Geraldine B Guillon, Lisa A Kurtz, Mark Fischl, Jay Lynn Unangst, Laura Kriebel, Gary Feiss, Michele Roehler** (2011//). Evaluation of a new, rapid test for detecting HCV infection, suitable for use with blood or oral fluid. *Journal of virological methods*, 172(1-2), 27

**Steven K Herrine, Beckie Michael, Wai Li Ma, Simona Rossi, Stephen R Dunn, Theresa Hyslop** (2002//). Development of an HCV infection risk stratification algorithm for patients on chronic hemodialysis. *The American journal of gastroenterology*, 97(10), 2619

**Subhash Medhi, Sai K Potukuchi, Sunil K Polipalli, Shyam S Swargiary, Purabi Deka, Anis Chaudhary, Anish Choudhary, Nargis Begum, Zahid Hussain, R S Ahlawat, Premashis Kar** (2008//). Diagnostic utility of hepatitis C virus core

antigen in hemodialysis patients. *Clinical biochemistry*, 41(7-8), 447

**Surabhi Tyagi, Alok Tyagi** (2013//). Possible Correlation of Transfusion Transmitted Diseases with Rh type and ABO Blood Group System. *Journal of clinical and diagnostic research : JCDR*, 7(9), 1930

**Susana Vitozzi, Pascal Lapierre, Idriss Djilali-Saiah, Fernando Alvarez** (2002//). Autoantibody detection in type 2 autoimmune hepatitis using a chimera recombinant protein. *Journal of immunological methods*, 262(1-2), 103

**Susana Vitozzi, Pascal Lapierre, Idriss Djilali-Saiah, Gabriel Marceau, Kathie Beland, Fernando Alvarez** (2004//). Anti-soluble liver antigen (SLA) antibodies in chronic HCV infection. *Autoimmunity*, 37(3), 217

**Susmita Maity, Srijita Nandi, Subrata Biswas, Salil Kumar Sadhukhan, Malay Kumar Saha** (2012//). Performance and diagnostic usefulness of commercially available enzyme linked immunosorbent assay and rapid kits for detection of HIV, HBV and HCV in India. *Virology journal*, 9(#issue#), 290

**Susumu Imaoka, Noriko Obata, Toyoko Hiroi, Mayuko Osada-Oka, Rie Hara, Shuhei Nishiguchi, Yoshihiko Funae** (2005//). A new epitope of CYP2D6 recognized by liver kidney microsomal autoantibody from Japanese patients with autoimmune hepatitis. *Biological & pharmaceutical bulletin*, 28(12), 2240

**Suzan D Pas, Roel H R A Streefkerk, Mark Pronk, Robert A de Man, Matthias F Beersma, Albert D M E Osterhaus, Annemiek A van der Eijk** (2013//). Diagnostic performance of selected commercial HEV IgM and IgG ELISAs for immunocompromised and immunocompetent patients. *Journal of clinical virology : the official publication of the Pan American Society for Clinical Virology*, 58(4), 629

**Syria Laperche, C Micha Nubling, Susan L Stramer, Ewa Brojer, Piotr Grabarczyk, Hiroshi Yoshizawa, Vytenis Kalibatas, Magdy El Elkyabi, Faten Moftah, Annie Girault, Harry van Drimmelen, Michael P Busch, Nico Lelie** (2015//). Sensitivity of hepatitis C virus core antigen and antibody combination assays in a global panel of window period samples. *Transfusion*, 55(10), 2489

**Syria Laperche, Genevieve Boukatou, Leonard Kouegnigan, Yacouba Nebie, Mohamed Ould Boulahi, Claude Tayou Tagny, Rakia Yahaya, Jean-Baptiste Tapko, Edward Murphy, Jean Jacques Lefrere** (2009//). Transfusion safety on

the African continent: an international quality control of virus testing in blood banks. *Transfusion*, 49(8), 1600

**Syria Laperche, Nadine Le Marrec, Annie Girault, Francoise Bouchardeau, Annabelle Servant-Delmas, Michele Maniez-Montreuil, Pierre Gallian, Thierry Levayer, Pascal Morel, Nicole Simon** (2005//). Simultaneous detection of hepatitis C virus (HCV) core antigen and anti-HCV antibodies improves the early detection of HCV infection. *Journal of clinical microbiology*, 43(8), 3877

**Syria Laperche, Nadine Le Marrec, Nicole Simon, Francoise Bouchardeau, Christine Defer, Michele Maniez-Montreuil, Thierry Levayer, Jean-Pierre Zappitelli, Jean-Jacques Lefrere** (2003//). A new HCV core antigen assay based on disassociation of immune complexes: an alternative to molecular biology in the diagnosis of early HCV infection. *Transfusion*, 43(7), 958

**Syria Laperche, Francophone African Group for Research in Blood Transfusion** (2013//). Multinational assessment of blood-borne virus testing and transfusion safety on the African continent. *Transfusion*, 53(4), 816

**T A Cha, J Kolberg, B Irvine, M Stempien, E Beall, M Yano, Q L Choo, M Houghton, G Kuo, J H Han** (1991//). Use of a signature nucleotide sequence of hepatitis C virus for detection of viral RNA in human serum and plasma. *Journal of clinical microbiology*, 29(11), 2528

**T Bizollon, S N Ahmed, S Guichard, P Chevallier, M Adham, C Ducerf, J Baulieux, C Trepo** (2000//). Anti-hepatitis C virus core IgM antibodies correlate with hepatitis C recurrence and its severity in liver transplant patients. *Gut*, 47(5), 698

**T Dao, I Lecointe, F Galateau, F Freymuth, A Rideau, J C Verwaerde, A Valla** (1993//). [Contribution of liver biopsy and serology of hepatitis C virus to the diagnosis of a moderate and prolonged elevation of aminotransferases]. *Gastroenterologie clinique et biologique*, 17(1), 37

**T G Morales, R E Sampliner, A Bhattacharyya, M J Alter** (1995//). Liver histology in anti-HCV-positive persons with normal or minimally elevated aminotransferases. *Journal of clinical gastroenterology*, 21(4), 301

**T Goeser, H M Muller, C Solbach, K Gmelin, F Kurzen, B Kommerell, L Theilmann** (1994//). Prevalence and serological manifestation of hepatitis C virus infection in patients with hepatitis non-A, non-B: a follow-up study. *Presse medicale*

(Paris, France : 1983), 23(17), 793

**T Heintges, L Mohr, C Niederau, F Scheffele, F Hensel, D Haussinger** (1998//). Quantitative hepatitis C RNA-polymerase chain reaction and detection with DNA-ELISA. *Hepato-gastroenterology*, 45(23), 1684

**T Karamitros, A Kakkanas, A Katsoulidou, V Sypsa, G Dalagiorgou, P Mavromara, A Hatzakis** (2012//). Detection of specific antibodies to HCV-ARF/CORE+1 protein in patients treated with pegylated interferon plus ribavirin. *Journal of viral hepatitis*, 19(3), 182

**T Kashiwakuma, A Hasegawa, T Kajita, A Takata, H Mori, Y Ohta, E Tanaka, K Kiyosawa, T Tanaka, S Tanaka, N Hattori, M Kohara** (1996//). Detection of hepatitis C virus specific core protein in serum of patients by a sensitive fluorescence enzyme immunoassay (FEIA). *Journal of immunological methods*, 190(1), 79

**T Konry, A Novoa, Y Shemer-Avni, N Hanuka, S Cosnier, Arielle Lepellec, R S Marks** (2005//). Optical fiber immunosensor based on a poly(pyrrole-benzophenone) film for the detection of antibodies to viral antigen. *Analytical chemistry*, 77(6), 1771

**T L Fong, G C Kanel, A Conrad, B Valinluck, F Charboneau, R H Adkins** (1994//). Clinical significance of concomitant hepatitis C infection in patients with alcoholic liver disease. *Hepatology (Baltimore, Md.)*, 19(3), 554

**T L Wright, H Hollander, X Pu, M J Held, P Lipson, S Quan, A Polito, M M Thaler, P Bacchetti, B F Scharschmidt** (1994//). Hepatitis C in HIV-infected patients with and without AIDS: prevalence and relationship to patient survival. *Hepatology (Baltimore, Md.)*, 20(5), 1152

**T M Chan, A S Lok, I K Cheng, R T Chan** (1993//). Prevalence of hepatitis C virus infection in hemodialysis patients: a longitudinal study comparing the results of RNA and antibody assays. *Hepatology (Baltimore, Md.)*, 17(1), 5

**T M McHugh, M K Viele, E S Chase, D J Recktenwald** (1997//). The sensitive detection and quantitation of antibody to HCV by using a microsphere-based immunoassay and flow cytometry. *Cytometry*, 29(2), 106

**T Matsubara, R Sumazaki, H Takita** (1995//). Mother-to-infant transmission of hepatitis C virus: a prospective study. *European journal of pediatrics*, 154(12), 973

**T Mazda, K Nakata, M Bannai, T Miyamura, J**

- Chiba, H Ohba, Y Kaminuma, T Katayama** (1993//). Follow-up study of anti-hepatitis C virus antibodies in blood donors implicated in post-transfusion non-A, non-B hepatitis. *Transfusion medicine (Oxford, England)*, 3(2), 149
- T Orth, G Gerken, K H Meyer Zum Buschenfelde, W J Mayet** (1997//). Antineutrophil nuclear antibodies (ANNA) in primary biliary cirrhosis: their prevalence and antigen specificity. *Zeitschrift fur Gastroenterologie*, 35(2), 113
- T Perez-Gracia, F Galan, C Fernandez-Gutierrez, J A Giron, M Rodriguez-Iglesias** (1999//). Relationship of hepatitis C viremia to HIV state and to infection by specific hepatitis C genotypes. *Liver*, 19(4), 288
- T Peters, L Mohr, F Scheffele, H J Schlayer, S Preisler, H Berthold, W Gerok, J Rasenack** (1994//). Antibodies and viremia in acute post-transfusion hepatitis C: a prospective study. *Journal of medical virology*, 42(4), 420
- T Tallo, M Lappalainen, V Tefanova, I Priimagi** (2000//). Distribution of hepatitis C virus genotypes in patients with chronic hepatitis C in northern Estonia. *Acta virologica*, 44(3), 175
- T Tanaka, K Tsukiyama-Kohara, K Yamaguchi, S Yagi, S Tanaka, A Hasegawa, Y Ohta, N Hattori, M Kohara** (1994//). Significance of specific antibody assay for genotyping of hepatitis C virus. *Hepatology (Baltimore, Md.)*, 19(6), 1347
- T Weinstein, R Tur-Kaspa, A Chagnac, A Korzets, Y Ori, D Zevin, M Herman, U Gafer** (2001//). Hepatitis C infection in dialysis patients in Israel. *The Israel Medical Association journal : IMAJ*, 3(3), 174
- Takeji Umemura, Richard Y-H Wang, Cathy Schechterly, J Wai-Kuo Shih, Kendo Kiyosawa, Harvey J Alter** (2006//). Quantitative analysis of anti-hepatitis C virus antibody-secreting B cells in patients with chronic hepatitis C. *Hepatology (Baltimore, Md.)*, 43(1), 91
- Talat J H Rizvi, Hassan Fatima** (2003//). Frequency of hepatitis C in obstetric cases. *Journal of the College of Physicians and Surgeons--Pakistan : JCPSP*, 13(12), 688
- Tatsuji Kimura, Akinori Rokuhara, Akihiro Matsumoto, Shintaro Yagi, Eiji Tanaka, Kendo Kiyosawa, Noboru Maki** (2003//). New enzyme immunoassay for detection of hepatitis B virus core antigen (HBcAg) and relation between levels of HBcAg and HBV DNA. *Journal of clinical microbiology*, 41(5), 1901
- Tatsuji Kimura, Akinori Rokuhara, Yoko Sakamoto, Shintaro Yagi, Eiji Tanaka, Kendo Kiyosawa, Noboru Maki** (2002//). Sensitive enzyme immunoassay for hepatitis B virus core-related antigens and their correlation to virus load. *Journal of clinical microbiology*, 40(2), 439
- Timo Rath, Lisa Hage, Marion Kugler, Katrin Menendez Menendez, Reinhart Zchoval, Lutz Naehrlich, Richard Schulz, Martin Roderfeld, Elke Roeb** (2013//). Serum proteome profiling identifies novel and powerful markers of cystic fibrosis liver disease. *PLoS one*, 8(3), e58955
- Tingxiu Xiang, Zheng Jiang, Jian Zheng, Chaoyu Lo, Harry Tsou, Guosheng Ren, Jun Zhang, Ailong Huang, Guoqi Lai** (2012//). A novel double antibody sandwich-lateral flow immunoassay for the rapid and simple detection of hepatitis C virus. *International journal of molecular medicine*, 30(5), 1041
- Tobias Hitziger, Michael Schmidt, Volkmar Schottstedt, Holger Hennig, Alexandra Schumann, Stefan Ross, Mengji Lu, Erhard Seifried, Michael Roggendorf** (2009//). Cellular immune response to hepatitis C virus (HCV) in nonviremic blood donors with indeterminate anti-HCV reactivity. *Transfusion*, 49(7), 1306
- Tohti Amet, Marwan Ghabril, Naga Chalasani, Daniel Byrd, Ningjie Hu, Ayslinn Grantham, Ziqing Liu, Xuebin Qin, Johnny J He, Qigui Yu** (2012//). CD59 incorporation protects hepatitis C virus against complement-mediated destruction. *Hepatology (Baltimore, Md.)*, 55(2), 354
- Torsten Feldt, Fred Stephen Sarfo, Alexander Zoufaly, Richard Odame Phillips, Gerd Burchard, Jan van Lunzen, Johannes Jochum, David Chadwick, Charles Awasom, Lisa Claussen, Christian Drosten, Jan Felix Drexler, Anna Maria Eis-Hubinger** (2013//). Hepatitis E virus infections in HIV-infected patients in Ghana and Cameroon. *Journal of clinical virology : the official publication of the Pan American Society for Clinical Virology*, 58(1), 18
- Toyoichiro Kudo, Aiko Kido, Yukiko Nishiyama, Hiroshi Koganeya, Takako Okuda, Motoshige Nabeshima, Yoshitsugu Iinuma, Satoshi Ichiyama** (2004//). Whole-blood counting immunoassay as a short-turnaround test for detection of hepatitis B surface antigen, anti-hepatitis C virus antibodies, and anti-Treponema pallidum antibodies. *Journal of clinical microbiology*, 42(9), 4250
- Tagliavini S.A., Mikawa A.Y., Yamanaka H., Henrique-Silva F., Costa P.I.** (2008//). Polysiloxane-poly(propylene oxide) hybrid discs as solid phase in anti-HCV detection using a

recombinant core protein *Talanta*, 75(2), 461

**Takamatsu J., Tsuda F., Okudaira M.** (1998//). Infection with GB virus C, hepatitis C and B viruses in 1,044 cases autopsied at the Medical Examiner's Office in Tokyo *Journal of Medical Virology*, 55(2), 123

**Takano S., Omata M., Ohto M., Satomura Y.** (1993//). Prospective assessment of donor blood screening for antibody to hepatitis C virus and high-titer antibody to HBcAg as a means of preventing posttransfusion hepatitis *Hepatology*, 18(2), 235

**Takao Y., Yamada A., Yutani S., Sata M., Itoh K.** (2004//). Antibody reactive to a hepatitis C virus (HCV)-derived peptide capable of inducing HLA-A2 restricted cytotoxic T lymphocytes is detectable in a majority of HCV-infected individuals without HLA-A2 restriction *Microbiology and Immunology*, 48(7), 507

**Taliani G., Badolato M.C., Lecce R., De Bac C., De Marzio E., Balsano C., Artini M., Levrero M.** (1992//). Recombinant immunoblot assay for hepatitis C virus antibody in chronic hepatitis *Archives of virology. Supplementum*, 4(#issue#), 232

**Taura N., Ichikawa T., Miyaaki H., Ozawa E., Tsutsumi T., Tsuruta S., Kato Y., Goto T., Kinoshita N., Fukushima M., Kato H., Ohata K., Ohba K., Masuda J., Hamasaki K., Yatsushiro H., Nakao K.** (2013//). Frequency of elevated biomarkers in patients with cryptogenic hepatocellular carcinoma *Medical Science Monitor*, 19(1), 742

**Tejada-Strop A., Drobeniuc J., Mixson-Hayden T., Forbi J.C., Le N.-T., Li L., Mei J., Terrault N., Kamili S.** (2015//). Disparate detection outcomes for anti-HCV IgG and HCV RNA in dried blood spots *Journal of virological methods*, 212(#issue#), 66

**Terjung B., Bogsch F., Klein R., Sohne J., Reichel C., Wasmuth J.C., Beuers U., Sauerbruch T., Spengler U.** (2004//). Diagnostic accuracy of atypical p-ANCA in autoimmune hepatitis using ROC- and multivariate regression analysis *European journal of medical research*, 9(9), 439

**Terzic D., Brmbolic B., Jevtovic D., Dupanovic B., Korac M., Selemovic D., Svirtlih N., Draskovic N., Mugosa B., Boricic I., Terzic Z.** (2008//). Liver enlargement associated with opportunistic infections in patients with human immunodeficiency virus infection *Journal of Gastrointestinal and Liver Diseases*, 17(4), 401

**Tong W., Gao W., Fei R., Feng B., Tao Q.** (1999//). Development of a universal immunoenzyme quantitative assay for detecting amplified products of nucleic acid and its preliminary application in hepatitis C virus *Chinese medical journal*, 112(5), 392

**Torane V., Shastri J.** (2008//). Comparison of ELISA and rapid screening tests for the diagnosis of HIV, hepatitis B and hepatitis C among healthy blood donors in a tertiary care hospital in Mumbai *Indian Journal of Medical Microbiology*, 26(3), 284

**Trepo C.** (1990//). Hepatitis virus C: from discovery to applications in public health *La Revue du praticien*, 40(18), 1631

**Trerotoli P., Fransvea E., Angelotti U., Antonaci G., Lupo L., Mazzocca A., Mangia A., Antonaci S., Giannelli G.** (2009//). Tissue expression of Squamous Cellular Carcinoma Antigen (SCCA) is inversely correlated to tumor size in HCC *Molecular Cancer*, 8(#issue#), no pagination

**Tseliou P., Spiliotakara A., Dimitracopoulos G.O., Christofidou M.** (2000//). Detection of hepatitis B virus DNA in blood units with anti-HBc as the only positive serological marker *Haematologia*, 30(3), 159

**Tsertsvadze T., Sharvadze L., Dzigua L., Dolmazashvili E., Nelson K.E.** (2008//). Acute/recent HCV infection. Clinical course, viral replication kinetics and disease outcome *Georgian medical news*, #volume#(165), 43

**Umemura T., Tanaka E., Ota M., Orii K., Yoshizawa K., Imai H., Sodeyama T., Kiyosawa K.** (1999//). TT virus infection in an area of high-endemicity for hepatitis C *Hepatology Research*, 13(3), 212

**Ummate I., Denué B.A., Kida I.M., Ohioma O.J., Baba D.B., Goni W.** (2014//). Risk factors for hepatitis C virus sero-positivity among haemodialysis patients receiving care at kidney centre in a tertiary health facility in Maiduguri, Nigeria *The Pan African medical journal*, 19(#issue#), 305

**Ur Rahman M., Akhtar G.N., Qadeer M., Shams T., Usmani A., Lodhi Y.** (2003//). Safe blood begins with safe donors *Pakistan Journal of Medical Sciences*, 19(3), 161

**Urbes F., Fruchart J.-S., Gras-Masse H., Melnyk O.** (2002//). C-terminal glyoxylyl peptides for sensitive enzyme-linked immunosorbent assays *Letters in Peptide Science*, 8(3-5), 253

**U B Hellstrom, S P Sylvan, R H Decker, A Sonnerborg** (1993//). Immunoglobulin M



1  
2  
3 reactivity towards the immunologically active  
4 region sp75 of the core protein of hepatitis C virus  
5 (HCV) in chronic HCV infection. *Journal of medical*  
6 *virology*, 39(4), 325

7  
8 **U L Mathiesen, B Ekermo, U Foberg, L Franzen,**  
9 **A Fryden, R Norlin, L G Pettersson, H Sterling, A**  
10 **Widell, G Bodemar** (1992//). Anti-hepatitis C  
11 virus screening will reduce the incidence of post-  
12 transfusion hepatitis C also in low-risk areas.  
13 *Scandinavian journal of gastroenterology*, 27(6),  
14 443

15 **U Magriples, P Bernstein, E Snyder, J A Copel**  
16 (1998//). Can risk factor screening predict  
17 hepatitis C antibody reactivity?. *American journal of*  
18 *perinatology*, 15(6), 395

19  
20 **U Schacker, H P Bermayer, V Boehler, D Ionescu,**  
21 **M Zapata, H Grauer, K Rai** (1995//). Rapid HCV  
22 RNA detection by PCR followed by a new non-  
23 radioactive liquid hybridisation assay and  
24 comparison with RIBA. *Journal of medical virology*,  
25 46(4), 304

26 **U Sengler, T Reinhard, O Adams, W Gerlich, R**  
27 **Sundmacher** (2001//). Testing of corneoscleral  
28 discs and their culture media of seropositive  
29 donors for hepatitis B and C virus genomes.  
30 *Graefe's archive for clinical and experimental*  
31 *ophthalmology = Albrecht von Graefes Archiv fur*  
32 *klinische und experimentelle Ophthalmologie*,  
33 239(10), 783

34 **U Wienhues, E Faatz, W Melchior, H Bayer**  
35 (1993//). Boehringer Mannheim modular test  
36 concepts in HIV and hepatitis immunoassays.  
37 *Clinical biochemistry*, 26(4), 295

38  
39 **U Zimmermann, L Love-Homan, P Gessner, D**  
40 **Clark, G Klock, F C Johlin, G A Neil** (1995//).  
41 Generation of a human monoclonal antibody to  
42 hepatitis C virus, JRA1 by activation of peripheral  
43 blood lymphocytes and hypo-osmolar  
44 electrofusion. *Human antibodies and hybridomas*,  
45 6(2), 77

46 **Uluhan Sili, Abdurrahman Kaya, Selda Aydin,**  
47 **Nur Hondur, Ali Mert, Fehmi Tabak, Resat**  
48 **Ozaras, Recep Ozturk** (2015//). HCV-specific  
49 lymphocyte responses in individuals with positive  
50 anti-HCV but negative HCV-RNA. *Journal of clinical*  
51 *virology : the official publication of the Pan*  
52 *American Society for Clinical Virology*, 67(#issue#),  
53 73

54 **Umberto Basile, Francesca Gulli, Eleonora Torti,**  
55 **Nicoletta De Matthaeis, Luigi Colacicco, Paola**  
56 **Cattani, Gian Lodovico Rapaccini** (2015//). Anti-  
57 nuclear antibody detection in cryoprecipitates:  
58 distinctive patterns in hepatitis C virus-infected

patients. *Digestive and liver disease : official journal*  
59 *of the Italian Society of Gastroenterology and the*  
60 *Italian Association for the Study of the Liver*, 47(1),  
50

**Usha K Sharma, Susan L Stramer, David J**  
**Wright, Simone A Glynn, Sigurd Hermansen,**  
**George B Schreiber, Steven H Kleinman, Michael**  
**P Busch, Retrovirus Epidemiology Donor Study**  
(2003//). Impact of changes in viral marker  
screening assays. *Transfusion*, 43(2), 202

**V Bhattacharjee, L E Prescott, I Pike, B Rodgers,**  
**H Bell, A R El-Zayadi, M C Kew, J Conradie, C K**  
**Lin, H Marsden** (1995//). Use of NS-4 peptides to  
identify type-specific antibody to hepatitis C virus  
genotypes 1, 2, 3, 4, 5 and 6. *The Journal of general*  
*virology*, 76 ( Pt 7)(#issue#), 1737

**V Gonzalez, E Martro, C Folch, A Esteve, L Matas,**  
**A Montoliu, J R Grifols, F Bolao, C Tural, R Muga,**  
**J V Parry, V Ausina, J Casabona** (2008//).  
Detection of hepatitis C virus antibodies in oral  
fluid specimens for prevalence studies. *European*  
*journal of clinical microbiology & infectious diseases*  
*: official publication of the European Society of*  
*Clinical Microbiology*, 27(2), 121

**V J Martlew, P Carey, C Y Tong, J V Parry, F J**  
**Belda, K L Barlow, P Chu, Q Syed** (2000//). Post-  
transfusion HIV infection despite donor screening:  
a report of three cases. *The Journal of hospital*  
*infection*, 44(2), 93

**Vana Sypsa, Mina Psychogiou, Antigoni**  
**Katsoulidou, Gregory Skoutelis, Spiridon**  
**Moutafis, Valsamakis Hadjiconstantinou, John**  
**Kakavas, Viktoria Kalapothaki, John Boletis,**  
**Angelos Hatzakis** (2005//). Incidence and  
patterns of hepatitis C virus seroconversion in a  
cohort of hemodialysis patients. *American journal*  
*of kidney diseases : the official journal of the*  
*National Kidney Foundation*, 45(2), 334

**Vinaya Rao, Fabrizio Fabrizi, Phillip Pennell,**  
**Eugene Schiff, Maria de Medina, Jeannine R**  
**Lane, Paul Martin, Linda Ivor** (2010//).  
Improved detection of hepatitis C virus infection by  
transcription-mediated amplification technology in  
dialysis population. *Renal failure*, 32(6), 721

**Vinca Icard, Olivier Diaz, Caroline Scholtes,**  
**Laure Perrin-Cocon, Christophe Ramiere, Ralf**  
**Bartenschlager, Francois Penin, Vincent**  
**Lotteau, Patrice Andre** (2009//). Secretion of  
hepatitis C virus envelope glycoproteins depends  
on assembly of apolipoprotein B positive  
lipoproteins. *PLoS one*, 4(1), e4233

**Vincent Aubert, Isabelle Graf Pisler, Francois**  
**Spertini** (2008//). Improved diagnoses of



1  
2  
3 autoimmune hepatitis using an anti-actin ELISA.  
4 *Journal of clinical laboratory analysis*, 22(5), 340

5  
6 **Vincent Leroy, Frederique Monier, Serge**  
7 **Bottari, Candice Trocme, Nathalie Sturm, Marie-**  
8 **Noelle Hilleret, Francoise Morel, Jean-Pierre**  
9 **Zarski** (2004//). Circulating matrix  
10 metalloproteinases 1, 2, 9 and their inhibitors  
11 TIMP-1 and TIMP-2 as serum markers of liver  
12 fibrosis in patients with chronic hepatitis C:  
13 comparison with PIIINP and hyaluronic acid. *The*  
14 *American journal of gastroenterology*, 99(2), 271

15 **Violaine Eyraud, Olivier Chazouilleres, Eric**  
16 **Ballot, Christophe Corpechot, Raoul Poupon,**  
17 **Catherine Johanet** (2009//). Significance of  
18 antibodies to soluble liver antigen/liver pancreas: a  
19 large French study. *Liver international : official*  
20 *journal of the International Association for the Study*  
21 *of the Liver*, 29(6), 857

22 **Van der Poel C.L., Reesink H.W.** (1991//). The  
23 impact of hepatitis C virus to blood transfusion  
24 services *European Journal of Gastroenterology and*  
25 *Hepatology*, 3(8), 597

26 **Vassilaki N., Mavromara P.** (2009//). The HCV  
27 ARFP/F/Core+1 protein: Production and functional  
28 analysis of an unconventional viral product *IUBMB*  
29 *Life*, 61(7), 739

30 **Vockel A.** (2005//). Response from Abbott to the  
31 two previous articles *Journal of Clinical Virology*,  
32 34(3), 216

33  
34 **Vos S., van Rossum I., Burns L., Knol D., Scheltens**  
35 **P., Soinenen H., Wahlund L.-O., Hampel H., Tsolaki**  
36 **M., Minthon L., Handels R., L'Italien G., van der**  
37 **Flier W., Aalten P., Teunissen C., Barkhof**  
38 **F., Blennow K., Wolz R., Rueckert D., Verhey**  
39 **F., Visser P.J.** (2012//). Test sequence of CSF and  
40 MRI biomarkers for prediction of AD in subjects  
41 with MCI *Neurobiology of Aging*, 33(10), 2272

42 **Wahib A.A., el-Nasr M.S., Mangoud A.M., el-Shazly**  
43 **A.M., Morsy A.T.** (2006//). The liver profile in  
44 patients with hepatitis C virus and/or fascioliasis  
45 *Journal of the Egyptian Society of Parasitology*,  
46 36(2), 405

47 **Wai C.-T., Fontana R.J.** (2004//). Clinical  
48 significance of hepatitis B virus genotypes, variants,  
49 and mutants *Clinics in Liver Disease*, 8(2), 321

50 **Wandtke T., Wozniak J., Kopinski P.** (2015//).  
51 Aptamers in diagnostics and treatment of viral  
52 infections *Viruses*, 7(2), 751

53 **Wang N.-Y., Zhang D., Zhao W., Fang G.-X., Shi Y.-**  
54 **L., Duan M.-H.** (2009//). Clinical application of an  
55 enzyme-linked immunosorbent assay detecting

hepatoma-specific gamma-glutamyltransferase  
*Hepatology Research*, 39(10), 979

**Wang W.-W., Ang S.F., Kumar R., Heah C., Utama**  
**A., Tania N.P., Li H., Tan S.H., Poo D., Choo**  
**S.P., Chow W.C., Tan C.K., Toh H.C.** (2013//).  
Identification of Serum Monocyte Chemoattractant  
Protein-1 and Prolactin as Potential Tumor  
Markers in Hepatocellular Carcinoma *PLoS ONE*,  
8(7), no pagination

**Wang X., Norris J.L., Liu Y., Reilly K.H., Wang Dr. N.**  
(2012//). Health-related attitudes and risk factors  
for sexually transmitted infections of Chinese  
women who have sex with women *Chinese Medical*  
*Journal*, 125(16), 2819

**Wei L., Yang R.-F., Xie Q., Shang J., Kong F.-Y., Zhang**  
**H.-Y., Rao H.-Y., Jin Q., Cong X., Liu Y.-Y., Kang Y.**  
(2014//). Hepatitis C virus core antigen, an earlier  
and stronger predictor on sustained virological  
response in patients with genotype 1 HCV infection  
*BMC gastroenterology*, 14(#issue#), 47

**Weisbord J.S., Trepka M.J., Zhang G., Smith**  
**I.P., Brewer T.** (2003//). Prevalence of and risk  
factors for hepatitis C virus infection among STD  
clinic clientele in Miami, Florida *Sexually*  
*transmitted infections*, 79(1), E1

**Wiwanitkit V.** (2012//). Serological screening test  
as a tool for early prevention of cancerous  
disorders *Jundishapur Journal of Microbiology*, 5(4),  
601

**Wolf F.H., Fuchs S.C., Brandao A.B.** (2011//).  
Absence of occult hepatitis B among blood donors  
in southern Brazil *Brazilian Journal of Infectious*  
*Diseases*, 15(2), 159

**Wong S.N., Campos J.R., Cua I.H.Y., Jamias**  
**J.D., Labio M.E.D., Tan J.L., Ong J.P., Salvana A.D., Go**  
**A.O., Payawal D.A.** (2015//). The 2014 hepatology  
society of the Philippines consensus statements on  
the diagnosis and treatment of hepatitis C  
*Phillippine Journal of Internal Medicine*, 53(1), 1

**Worman H.J.** (1997//). Molecular biological  
methods in diagnosis and treatment of liver  
diseases *Clinical Chemistry*, 43(8 SUPPL.), 1476

**Wozniakowska-Gesicka T., Zeman**  
**K., Wisniewska-Ligier M., Kups J., Puchala**  
**B., Glowacka E., Mixa D., Mixa A., Dworniak D.**  
(1998//). Serum levels of IL-1beta, IL-6, TNF-alpha  
and sTNFRp55 in children with chronic hepatitis C  
in respect to HCV genotype *International Review of*  
*Allergology and Clinical Immunology*, 4(2), 94

**W A Al-Kubaisy, K T Al-Naib, M Habib** (2006//).  
Seroprevalence of hepatitis C virus specific

antibodies among Iraqi children with thalassaemia. *Eastern Mediterranean health journal = La revue de sante de la Mediterranee orientale = al-Majallah al-s.ih.h.ayah li-sharq al-mutawassit.*, 12(1-2), 204

**W E Hitzler, S Runkel** (2001//). Routine HCV PCR screening of blood donations to identify early HCV infection in blood donors lacking antibodies to HCV. *Transfusion*, 41(3), 333

**W K Roth, M Weber, E Seifried** (1999//). Feasibility and efficacy of routine PCR screening of blood donations for hepatitis C virus, hepatitis B virus, and HIV-1 in a blood-bank setting. *Lancet (London, England)*, 353(9150), 359

**W L Irving, S Day, D Bennett, R P Eglin, P Flanagan, P Nuttall, V James** (1993//). Use of anti-GOR testing in the screening of blood donors for hepatitis C virus infection. *Vox sanguinis*, 65(1), 38

**W Prohaska, C Wolff, K Schluter, W Koster-Eiserfunke, M M Korner, K Kleesiek** (1992//). Immunoglobulin preparations from hepatitis C antibody-positive plasma donors: influence on diagnosis and risk of infection in heart transplant recipients. *The Clinical investigator*, 70(7), 573

**W Zhai, J Davies, D Z Shang, S W Chan, J P Allain** (1999//). Human recombinant single-chain antibody fragments, specific for the hypervariable region 1 of hepatitis C virus, from immune phage-display libraries. *Journal of viral hepatitis*, 6(2), 115

**Wen Wang, Lan-Juan Zhao, Yan Wang, Qing-Yuan Tao, Mark A Feitelson, Ping Zhao, Hao Ren, Zhong-Tian Qi** (2011//). Application of HBx-induced anti-URGs as early warning biomarker of cirrhosis and HCC. *Cancer biomarkers : section A of Disease markers*, 11(1), 29

**Wu-Shiung Huang, Sheng-Nan Lu, Jing-Houng Wang, Chuan-Mo Lee, Hung-Da Tung, Tsung-Ming Chen, Chi-Sin ChangChien** (2005//). Prediction of viremia for cases of hepatitis C virus (HCV) infection using a third-generation anti-HCV enzyme immunoassay test. *Hepato-gastroenterology*, 52(63), 893

**X De Lamballerie** (1996//). Serological and molecular biology screening techniques for HVC infection. *Nephrology, dialysis, transplantation : official publication of the European Dialysis and Transplant Association - European Renal Association*, 11 Suppl 4(#issue#), 9

**X Fornas, M D Maluenda, F X Lopez-Labrador, S Ampurdanes, E Olmedo, J Costa, P Simmonds, J M Sanchez-Tapias, M T Jimenez De Anta, J Rodes** (1996//). Comparative study of three methods for

genotyping hepatitis C virus strains in samples from Spanish patients. *Journal of clinical microbiology*, 34(10), 2516

**X Zavitsanos, A Hatzakis, E Kaklamani, A Tzonou, N Toupadaki, C Broeksma, J Chrispeels, H Troonen, S Hadziyannis, C C Hsieh** (1992//). Association between hepatitis C virus and hepatocellular carcinoma using assays based on structural and nonstructural hepatitis C virus peptides. *Cancer research*, 52(19), 5364

**Xiao-Min Xin, Gui-Qiu Li, Ying-Yu Jin, Min Zhuang, Di Li** (2008//). Combination of small interfering RNAs mediates greater suppression on hepatitis B virus cccDNA in HepG2.2.15 cells. *World journal of gastroenterology*, 14(24), 3849

**Xin Lu, Min Yao, Jian-Min Zhang, Jing Yang, Ying-Feng Lei, Xiao-Jun Huang, Zhan-Sheng Jia, Li Ma, Hai-Yun Lan, Zhi-Kai Xu, Wen Yin** (2014//). Identification of peptides that bind hepatitis C virus envelope protein E2 and inhibit viral cellular entry from a phage-display peptide library. *International journal of molecular medicine*, 33(5), 1312

**Xin-Xin Zhang, Qiang Deng, Shen-Ying Zhang, Jing Liu, Qian Cai, Zhi-Meng Lu, Yuan Wang** (2003//). Broadly cross-reactive mimotope of hypervariable region 1 of hepatitis C virus derived from DNA shuffling and screened by phage display library. *Journal of medical virology*, 71(4), 511

**Xiuying Liu, Xiumei Chi, Qiaoling Gong, Lei Gao, Yuqiang Niu, Xiaojing Chi, Min Cheng, Youhui Si, Maorong Wang, Jin Zhong, Junqi Niu, Wei Yang** (2015//). Association of serum level of growth differentiation factor 15 with liver cirrhosis and hepatocellular carcinoma. *PLoS one*, 10(5), e0127518

**Xiao X., Zhai J., Zeng J., Tian C., Wu H., Yu Y.** (2013//). Comparative evaluation of a triplex nucleic acid test for detection of HBV DNA, HCV RNA, and HIV-1 RNA, with the Procleix Tigris System *Journal of Virological Methods*, 187(2), 357

**Yamasaki Y., Narain S., Hernandez L., Barker T., Ikeda K., Segal M.S., Richards H.B., Chan E.K., Reeves W.H., Satoh M.** (2006//). Autoantibodies against the replication protein A complex in systemic lupus erythematosus and other autoimmune diseases *Arthritis research & therapy*, 8(4), R111

**Yan J., Dennin R.H.** (2000//). A high frequency of GBV - C/HGV coinfection in hepatitis C patients in Germany *World Journal of Gastroenterology*, 6(6), 833

**Yang G., Vyas G.N.** (1996//). Immunodiagnosis of

viral hepatitis A to E and non-A to -E *Clinical and Diagnostic Laboratory Immunology*, 3(3), 247

**Yang J., Ji S., Zhang Y., Wang J.** (2013//). Helicobacter hepaticus infection in primary hepatocellular carcinoma tissue *Singapore Medical Journal*, 54(8), 451

**Yang Y.P., Liu C.B., Jin D.Y., Zhan M.Y., Tang Q., Xia N.S., Cao J.Y., Li J.Y.** (1994//). cDNA cloning of c33-c antigen gene derived from NS3 region of Chinese HCV genome, expression in Escherichia coli and development of HCV EIA second-generation diagnostic kit *Science in China. Series B, Chemistry, life sciences & earth sciences*, 37(2), 190

**Yao C., Fu Q., Xiao W.H., Dong W., Yi Y.L.** (1993//). Detection of HCV infection by cPCR in patients with acute leukemia *Chinese medical journal*, 106(9), 647

**Yao P., Hu X., Hu D.** (2000//). Study of hepatitis C virus specific immune responses in anti-HCV positive patients without hepatitis C viremia *Zhonghua shi yan he lin chuang bing du xue za zhi = Zhonghua shiyan he linchuang bingduxue zazhi = Chinese journal of experimental and clinical virology*, 14(3), 227

**Yilmaz A., Alagozlu H., Ozdemir O., Arici S.** (2014//). Effects of the Chemokine receptor 5 (CCR5)-delta32 mutation on hepatitis C virus-specific immune responses and liver tissue pathology in HCV infected patients *Hepatitis Monthly*, 14(7), no pagination

**Yoshida C.F., Takahashi Y., Vanderborght B.O., Rouzere C.D., Franca M.S., Takahashi C., Takamizawa A., Yoshida I., Schatzmayr H.G.** (1993//). Antibodies against non-structural c100/3 and structural core antigen of hepatitis C virus (HCV) in hemodialysis patients *Revista do Instituto de Medicina Tropical de Sao Paulo*, 35(4), 315

**Yoshida H., Ishikawa H., Honda S., Miura Y., Ogata M.** (1992//). False positive reaction of heat-inactivated sera in enzyme-linked immunosorbent assay for antibody to hepatitis C virus *Fukushima journal of medical science*, 38(1), 35

**Yoshikawa A., Gotanda Y., Itabashi M., Minegishi K., Kanemitsu K., Nishioka K.** (2005//). Hepatitis B NAT virus-positive blood donors in the early and late stages of HBV infection: Analyses of the window period and kinetics of HBV DNA *Vox Sanguinis*, 88(2), 77

**Yuk C.S., Lee H.K., Kim H.T., Choi Y.K., Lee B.C., Chun B.H., Chung N.** (2004//). Development and evaluation of a protein microarray chip for

diagnosis of hepatitis C virus *Biotechnology letters*, 26(20), 1563

**Yunomura K., Sugaya H., Harada T., Tsuda F., Okamoto H.** (1994//). Type-specific antibodies to hepatitis C virus in patients with chronic hepatitis C for predicting response to interferon alfa *International Hepatology Communications*, 2(4), 201

**Y Akahane, M Kojima, Y Sugai, M Sakamoto, Y Miyazaki, T Tanaka, F Tsuda, S Mishiro, H Okamoto, Y Miyakawa, M Mayumi** (1994//). Hepatitis C virus infection in spouses of patients with type C chronic liver disease. *Annals of internal medicine*, 120(9), 748

**Y Bayraktar, M Bayraktar, A Gurakar, T I Hassanein, D H Van Thiel** (1997//). A comparison of the prevalence of autoantibodies in individuals with chronic hepatitis C and those with autoimmune hepatitis: the role of interferon in the development of autoimmune diseases. *Hepato-gastroenterology*, 44(14), 417

**Y Lazizi, E Elfassi, J Pillot** (1992//). Detection of hepatitis C virus sequences in sera with controversial serology by nested polymerase chain reaction. *Journal of clinical microbiology*, 30(4), 931

**Y Nakamoto, S Kaneko, H Ohno, M Honda, M Unoura, S Murakami, K Kobayashi** (1996//). B-cell epitopes in hypervariable region 1 of hepatitis C virus obtained from patients with chronic persistent hepatitis. *Journal of medical virology*, 50(1), 35

**Y Suzuki, C Matsumoto, J Watanabe, N Yahagi, K Nishioka** (1993//). Low temperature dependent IgG3 subclass antibody with low avidity to C100-3 antigen derived from hepatitis C virus in voluntary blood donors. *Japanese journal of medical science & biology*, 46(2), 57

**Y Watanabe, S Harada, I Saito, T Miyamura** (1991//). Prevalence of antibody against the core protein of hepatitis C virus in patients with hepatocellular carcinoma. *International journal of cancer*, 48(3), 340

**Yalena Amador-Canizares, Liz Alvarez-Lajonchere, Ivis Guerra, Ingrid Rodriguez-Alonso, Gillian Martinez-Donato, Julian Triana, Eddy E Gonzalez-Horta, Angel Perez, Santiago Duenas-Carrera** (2008//). Induction of IgA and sustained deficiency of cell proliferative response in chronic hepatitis C. *World journal of gastroenterology*, 14(44), 6844

**Yan-Shen Shan, Yu-Hsiang Hsieh, Pin-Wen Lin**

(2007//). Telomerase activity in tumor and remnant liver as predictor of recurrence and survival in hepatocellular carcinoma after resection. *World journal of surgery*, 31(5), 1121

**Yan-Wei Zhong, Jun Cheng, Gang Wang, Shuang-Shuang Shi, Li Li, Ling-Xia Zhang, Ju-Mei Chen** (2002//). Preparation of human single chain Fv antibody against hepatitis C virus E2 protein and its identification in immunohistochemistry. *World journal of gastroenterology*, 8(5), 863

**Yasunobu Fukuda, Hiroshi Yotsuyanagi, Seido Ooka, Taichi Sekine, Junki Koike, Toshifumi Takano, Michihiro Suzuki, Fumio Itoh, Kusuki Nishioka, Tomohiro Kato** (2004//). Identification of a new autoantibody in patients with chronic hepatitis. *Human immunology*, 65(12), 1530

**Yi-Wei Tang, Haijing Li, Ann Roberto, Diane Warner, Belinda Yen-Lieberman** (2004//). Detection of hepatitis C virus by a user-developed reverse transcriptase-PCR and use of amplification products for subsequent genotyping. *Journal of clinical virology : the official publication of the Pan American Society for Clinical Virology*, 31(2), 148

**Yinon Shapira, Nancy Agmon-Levin, Yves Renaudineau, Bat Sheva Porat-Katz, Ori Barzilai, Maya Ram, Pierre Youinou, Yehuda Shoenfeld** (2012//). Serum markers of infections in patients with primary biliary cirrhosis: evidence of infection burden. *Experimental and molecular pathology*, 93(3), 386

**Yoann Morice, Maxime Ratinier, Ahmed Miladi, Stephane Chevaliez, Georgios Germanidis, Heiner Wedemeyer, Syria Laperche, Jean-Pierre Lavergne, Jean-Michel Pawlotsky** (2009//). Seroconversion to hepatitis C virus alternate reading frame protein during acute infection. *Hepatology (Baltimore, Md.)*, 49(5), 1449

**Yoichi Hiasa, Jason T Blackard, Wenyu Lin, Yoshitaka Kamegaya, Norio Horiike, Morikazu Onji, Emmett V Schmidt, Raymond T Chung** (2006//). Cell-based models of sustained, interferon-sensitive hepatitis C virus genotype 1 replication. *Journal of virological methods*, 132(1-2), 195

**Yong Zhou, Shao-Duo Yan, Shuai-Zheng Jia, Hai-Ping Wang, Qiu-Xia Fu, Juan Du, Xiao-Hui Wang, Sheng-Qiang Liang, Jin-Gang Zhang, Lin-Sheng Zhan** (2012//). Noninvasive molecular imaging of interferon beta activation in mouse liver. *Liver international : official journal of the International Association for the Study of the Liver*, 32(3), 383

**Yuan Tian, Heng-Hui Zhang, Lai Wei, Shao-Cai Du, Hong-Song Chen, Ran Fei, Feng Liu** (2007//).

The functional evaluation of dendritic cell vaccines based on different hepatitis C virus nonstructural genes. *Viral immunology*, 20(4), 553

**Yukari Takao, Akira Yamada, Shigeru Yutani, Hiroko Takedatsu, Takeharu Ono, Kojyu Etoh, Yi Wang, Susumu Suzuki, Tatsuya Ide, Kunitada Shimotohno, Michio Sata, Kyogo Itoh** (2007//). Identification of new immunogenic peptides in conserved regions of hepatitis C virus (HCV) 1b with the potentiality to generate cytotoxic T lymphocytes in HCV1b(+) HLA-A24(+) patients. *Hepatology research : the official journal of the Japan Society of Hepatology*, 37(3), 186

**Yukiko Kanno, Hiroshi Watanabe, Atsushi Takahashi, Kazumichi Abe, Hiromasa Ohira** (2014//). Anti-phosphoenolpyruvate carboxylase 2 antibody in patients with autoimmune hepatitis. *Hepatology research : the official journal of the Japan Society of Hepatology*, 44(9), 1019

**Yun Zhou, Futao Zhao, Lin Chen, Li Ma, Yu Wang, Yu He, Zhiyuan Ma, Haili Liu, Yonghong Guo, Ying Zhang, Zhiqiang Yao, Chunqiu Hao, Zhansheng Jia** (2013//). Development of a dendritic cell vaccine encoding multiple cytotoxic T lymphocyte epitopes targeting hepatitis C virus. *International journal of molecular medicine*, 32(4), 901

**Yves Riviere, Thomas Montange, Genevieve Janvier, Caroline Marnata, Ludovic Durrieu, Marie-Laure Chaix, Maria Isagulians, Odile Launay, Jean-Louis Bresson, Stanislas Pol** (2012//). Hepatitis C virus-specific cellular immune responses in individuals with no evidence of infection. *Virology journal*, 9(issue#), 76

**Z Amoura, S Koutouzov, H Chabre, P Cacoub, I Amoura, L Musset, J F Bach, J C Piette** (2000//). Presence of antinucleosome autoantibodies in a restricted set of connective tissue diseases: antinucleosome antibodies of the IgG3 subclass are markers of renal pathogenicity in systemic lupus erythematosus. *Arthritis and rheumatism*, 43(1), 76

**Z M Stoecker, M Fogel, A Smirov, D Ergas, Y Lurie, D D Bass, D Geltner, S D Malnick** (2000//). Anticardiolipin autoantibodies in serum samples and cryoglobulins of patients with chronic hepatitis C infection. *Annals of the rheumatic diseases*, 59(6), 483

**Z X Zhang, Z B Yun, M Chen, A Sonnerborg, M Sallberg** (1995//). Evaluation of a multiple peptide assay for typing of antibodies to the hepatitis C virus: relation to genomic typing by the polymerase chain reaction. *Journal of medical virology*, 45(1), 50



**Z Y Zhu, O Minenkova, F Bellintani, A De Tomassi, L Urbanelli, F Felici, P Monaci** (2000//). 'In vitro evolution' of ligands for HCV-specific serum antibodies. *Biological chemistry*, 381(3), 245

**Zaccheaus A Jeremiah, Halima Idris, Babajide B Ajayi, Anthony C U Ezimah, Mohammed B Malah, Maryceline M Baba** (2011//). Isolated anti-HBc-IgM antibody among blood donors in the semi-arid region of Nigeria. *Human antibodies*, 20(3-4), 77

**Zhejia Zhang, Linyong Xu, Zhiming Wang** (2011//). Screening serum biomarkers for early primary hepatocellular carcinoma using a phage display technique. *Journal of clinical laboratory analysis*, 25(6), 402

**Zhigang Hu, Mei Li, Jie Liu, Lei Yu, Yifeng Xue, Yu Chen** (2015//). Detection of Hepatitis B Virus Large Surface Protein Using a Time-Resolved Immunofluorometric Assay. *Journal of clinical laboratory analysis*, 29(6), 498

**Zhongsheng Guo, Henghui Zhang, Huiying Rao, Dong Jiang, Xu Cong, Bo Feng, Jianghua Wang, Lai Wei, Hongsong Chen** (2012//). DCs pulsed with novel HLA-A2-restricted CTL epitopes against hepatitis C virus induced a broadly reactive anti-HCV-specific T lymphocyte response. *PLoS one*, 7(6), e38390

**Zoltan Lukacs, Alexandra Dietrich, Rainer Ganschow, Alfried Kohlschutter, Rudolf Kruithof** (2005//). Simultaneous determination of HIV antibodies, hepatitis C antibodies, and hepatitis B antigens in dried blood spots--a feasibility study using a multi-analyte immunoassay. *Clinical chemistry and laboratory medicine*, 43(2), 141  
*of the Saudi Center for Organ Transplantation, Saudi Arabia*, 25(6), 1315  
//). The cost-effectiveness of screening and treatment for hepatitis C in prisons in England and Wales: A cost-utility analysis *Journal of Viral Hepatitis*, 15(11), 797

**Zaman A., Rosen H.R., Ingram K., Corless C.L., Oh E., Smith K.** (2007//). Assessment of FIBROspect II to Detect Hepatic Fibrosis in Chronic Hepatitis C Patients *American Journal of Medicine*, 120(3), 280

**Zekri A.-R., Youssef A.S.E.-D., Bakr Y.M., Gabr R.M., El-Rouby M.N.E.-D., Hammad I., Ahmed E.A.E.-M., Marzouk H.A.E.-H., Nabil M.M., Hamed H.A.E.-H., Aly Y.H., Zachariah K.S., Esmat G.** (2015//). Serum biomarkers for early detection of hepatocellular carcinoma associated with HCV infection in Egyptian patients *Asian Pacific journal of cancer prevention : APJCP*, 16(3), 1281

**Zekri A.-R.N., Bahnassy A.A., El-Din H.M.A., Morsy H.M., Shaarawy S., Moharram N.Z., Daoud S.S.** (2011//). Serum levels of beta-catenin as a potential marker for genotype 4/hepatitis C-associated hepatocellular carcinoma *Oncology Reports*, 26(4), 825

**Zekri A.-R.N., Bahnassy A.A., Khaled H.M., Mansour O., Attia M.A.** (1995//). Comparative analysis of different PCR techniques for detection of HCV in hepatocellular carcinoma patients *Cancer Journal*, 8(6), 331

**Zervou E.K., Boumba D.S., Liaskos Ch., Georgiadou S., Tsianos E.V., Dalekos G.N.** (2003//). Low prevalence of HCV, HIV, and HTLV-I/II infection markers in northwestern Greece: Results of a 3-year prospective donor study (1995-1997) *European Journal of Internal Medicine*, 14(1), 39

**Zhang H.-Q., Li S.-B., Wang G.-H., Chen K., Song X.-G., Feng X.-Y.** (2007//). Detection of hepatitis C virus core antigen for early diagnosis of hepatitis C virus infection in plasma donor in China *World Journal of Gastroenterology*, 13(19), 2738

**Zhang K., Wang L., Sun Y., Zhang R., Lin G., Xie J., Li J.** (2014//). Improving the safety of blood transfusion by using a combination of two screening assays for hepatitis C virus *Transfusion medicine (Oxford, England)*, 24(5), 297

**Zhang W., Dong S.-F., Sun S.-H., Wang Y., Li G.-D., Qu D.** (2006//). Coimmunization with IL-15 plasmid enhances the longevity of CD8 T cells induced by DNA encoding hepatitis B virus core antigen *World Journal of Gastroenterology*, 12(29), 4727

**Zhang W., Huang J., Zhou M.F., Chen L.Y., Ding Y.P., Cao H.J., Geng Y.Y., Wang S.Q.** (2005//). Protein chip for detection of different HCV antibodies: preparation, quality control, and clinical evaluation *Molecular diagnosis : a journal devoted to the understanding of human disease through the clinical application of molecular biology*, 9(2), 81

**Zhao L.-J., Zhang X.-L., Zhao P., Cao J., Cao M.-M., Zhu S.-Y., Liu H.-Q., Qi Z.-T.** (2006//). Up-regulation of ERK and p38 MAPK signaling pathways by hepatitis C virus E2 envelope protein in human T lymphoma cell line *Journal of Leukocyte Biology*, 80(2), 424

**Zhao Q., Dennin R.H.** (1993//). Investigations on the selection of primers suitable for reverse transcription and polymerase chain reaction in hepatitis C (HCV) diagnosis, and correlation to the



anti-HCV status *Klinisches Labor*, 39(9), 637

**Zhevachevsky N.G., Nomokonova N.Yu., Beklemishev A.B., Belov G.F.** (2000//). Dynamic study of HBsAg and HBeAg in saliva samples from patients with hepatitis B infection: Diagnostic and epidemiological significance *Journal of Medical Virology*, 61(4), 433

**Zibert A., Dudziak P., Schreier E., Roggendorf M.** (1997//). Characterization of antibody response to hepatitis C virus protein E2 and significance of hypervariable region 1-specific antibodies in viral neutralization *Archives of Virology*, 142(3), 523

## 2. What TYPE OF PUBLICATION is it?

**J P Allain** (1998//). The status of hepatitis C virus screening. *Transfusion medicine reviews*, 12(1), 46

**Janot C.** (1994//). ELISA kits for detection of anti-HCV antibodies. "Viral Hepatitis" Working Group of the French Society of Blood Transfusion *Transfusion clinique et biologique : journal de la Societe francaise de transfusion sanguine*, 1(1), 47

**Lambert N.** (2007//). Value of HCV antigen-antibody combined HCV assay in hepatitis C diagnosis *Advances in Transfusion Safety Volume IV, Developments in Biologicals*, 127(#issue#), 113

**Neelam Marwaha, Suchet Sachdev** (2014//). Current testing strategies for hepatitis C virus infection in blood donors and the way forward. *World journal of gastroenterology*, 20(11), 2948

**Nelson K.E., Shan H.** (2008//). Confirmatory testing of hepatitis C virus-positive enzyme immunoassay results in limited-resource countries: Should it be attempted? *Transfusion*, 48(6), 1239

**Roberio Amorim de Almeida Ponde** (2013//). Enzyme-linked immunosorbent/chemiluminescence assays, recombinant immunoblot assays and nucleic acid tests in the diagnosis of HCV infection. *European journal of clinical microbiology & infectious diseases : official publication of the European Society of Clinical Microbiology*, 32(8), 985

## 3. Is the STUDY POPULATION comprised of asymptomatic, non-pregnant adults (aged 18+ years) with unknown liver enzyme values at average risk of HCV infection?

**Alexandru S., Antipa C., Ionescu R., Tanasescu C.** (1998//). Comparison between reverse

transcription-polymerase chain reaction and immune enzyme assays in the diagnosis of hepatitis C virus infection *Romanian journal of internal medicine = Revue roumaine de medecine interne*, 36(1-2), 57

**Ali A., Lal A.** (2010//). False positivity of serological tests for hepatitis C virus *Journal of Ayub Medical College, Abbottabad : JAMC*, 22(2), 43

**A Da Porto, P Poli, P Calzavara, M R Castelletto, A Adami, C Cascone, G P Amici, T Teodori, L Okolicsanyi** (1992//). Comparison between first- and second-generation test for anti-hepatitis C virus antibodies in hemodialysis patients. *Nephron*, 61(3), 367

**A K Reddy, K V Dakshinamurty, V Lakshmi** (2006//). Utility of HCV core antigen ELISA in the screening for hepatitis C virus infection in patients on hemodialysis. *Indian journal of medical microbiology*, 24(1), 55

**A Schnuriger, S Dominguez, M-A Valantin, R Tubiana, C Duvivier, J Ghosn, A Simon, C Katlama, V Thibault** (2006//). [Early detection of hepatitis C virus infection using a new combined antigen-antibody detection assay: potential use in HIV co-infected individuals]. *Pathologie-biologie*, 54(10), 578

**A Widell, A S Mansson, G Sundstrom, B G Hansson, E Nordenfelt** (1991//). Hepatitis C virus RNA in blood donor sera detected by the polymerase chain reaction: comparison with supplementary hepatitis C antibody assays. *Journal of medical virology*, 35(4), 253

**Alexandre Macedo de Oliveira, Kathryn L White, Brady D Beecham, Dennis P Leschinsky, Brett P Foley, Janel Dockter, Cristina Giachetti, Thomas J Safranek** (2006//). Sensitivity of second-generation enzyme immunoassay for detection of hepatitis C virus infection among oncology patients. *Journal of clinical virology : the official publication of the Pan American Society for Clinical Virology*, 35(1), 21

**Ana M Contreras, Claudia M Tornero-Romo, Jose G Toribio, Alfredo Celis, Axel Orozco-Hernandez, P Kristian Rivera, Claudia Mendez, M Isabel Hernandez-Lugo, Laura Olivares, Martha A Alvarado** (2008//). Very low hepatitis C antibody levels predict false-positive results and avoid supplemental testing. *Transfusion*, 48(12), 2540

**B J Pereira, T L Wright, C H Schmid, C F Bryan, R C Cheung, E S Cooper, H Hsu, R Heyn-Lamb, J A Light, D J Norman** (1994//). Screening and confirmatory testing of cadaver organ donors for

hepatitis C virus infection: a U.S. National Collaborative Study. *Kidney international*, 46(3), 886

**Busch M.P., Tobler L.H., Tegtmeier G., Polito A., Quan S., Hirschler N.V., Dockter J., Giachetti C., Mimms L.** (2000//). Use of third-generation hepatitis C virus (HCV) enzyme immunoassay (EIA) to resolve second-generation HCV EIA-reactive and second-generation recombinant immunoblot assay-indeterminate blood samples: Data to support current food and drug administration guidance on HCV lookback *Transfusion*, 40(1), 10

**Cecille A., Wendling M.J., Panabieres O., Gut J.P.** (1999//). Retrospective study of RIBA-3 pattern in 68 patients with controversial results by third-generation hepatitis C virus ELISA assays *Pathologie Biologie*, 47(5), 508

**Contreras A.M., Tinoco E., Celis A., Novelo B., Romero M.V.P., Carrada E., Jimenez-Mendez R., Morales A.B., Garcia I.O., Rodriguez Carbajal O., Hernandez Lugo M.I., Olivares L.P., Gonzalez C.R., Hernandez S.R., Mercado Suarez M.F., Martinez Perry S., Herrera Aguilar J., Amaton R., Lopez Arroyo J.L., Aguirre Aguirre I.J., Garcia Ramos V.H., Gonzalez Santos M.A., Juarez Terrazas J.L., Gutierrez Almanza J., Rivas M.V., Herrera G.C., Del Rio L.T.V., Miranda J.R., Vargas Maldonado T.M., Mariscal C.G., Malagon A., Del Carmen Mavil Lara L., Barbosa R., De Jesus Pichardo M., De Lourdes Pandura R., Palomares B., Chongo Alfaro M.L.** (2007//). Hepatitis C antibody intraassay correlation: Is retest in duplicate necessary? *Transfusion*, 47(9), 1686

**Caroline E Mullis, Oliver Laeyendecker, Steven J Reynolds, Ponsiano Ocama, Jeffrey Quinn, Iga Boaz, Ronald H Gray, Gregory D Kirk, David L Thomas, Thomas C Quinn, Lara Stabinski** (2013//). High frequency of false-positive hepatitis C virus enzyme-linked immunosorbent assay in Rakai, Uganda. *Clinical infectious diseases : an official publication of the Infectious Diseases Society of America*, 57(12), 1747

**Catherine Gaudy, Catherine Thevenas, Jean Tichet, Nicole Mariotte, Alain Goudeau, Frederic Dubois** (2005//). Usefulness of the hepatitis C virus core antigen assay for screening of a population undergoing routine medical checkup. *Journal of clinical microbiology*, 43(4), 1722

**D Bresters, H T Cuypers, H W Reesink, W P Schaasberg, C L van der Poel, E P Mauser-Bunschoten, M Houghton, Q L Choo, G Kuo, R Lesniewski** (1992//). Enhanced sensitivity of a second generation ELISA for antibody to hepatitis C virus. *Vox sanguinis*, 62(4), 213

**D Robert Dufour, Mageli Talastas, Maria D A Fernandez, Barbara Harris, Doris B Strader, Leonard B Seeff** (2003//). Low-positive anti-hepatitis C virus enzyme immunoassay results: an important predictor of low likelihood of hepatitis C infection. *Clinical chemistry*, 49(3), 479

**D Y Chien, P Arcangel, A Medina-Selby, D Coit, M Baumeister, S Nguyen, C George-Nascimento, A Gyenes, G Kuo, P Valenzuela** (1999//). Use of a novel hepatitis C virus (HCV) major-epitope chimeric polypeptide for diagnosis of HCV infection. *Journal of clinical microbiology*, 37(5), 1393

**Dalekos G.N., Zervou E.K., Bouba D.S., Tsianos E.V.** (1996//). Frequency of viraemia due to hepatitis C virus among individuals with indeterminate results after RIBA-II HCV test. A preliminary study *Hellenic Journal of Gastroenterology*, 9(2), 160

**E Kocabas, N Aksaray, E Alhan, A Tanyeli, F Koksal, F Yarkin** (1997//). Hepatitis B and C virus infections in Turkish children with cancer. *European journal of epidemiology*, 13(8), 869

**F G Gabriel, C G Teo** (1994//). Peptide based enzyme immunoassays for detecting hepatitis C antibodies in sera of people at high risk. *Journal of clinical pathology*, 47(4), 357

**Francois Rouet, Luc Deleplancque, Berthold Bivigou Mboumba, Jeanne Sica, Augustin Mouinga-Ondeme, Florian Liegeois, Alain Goudeau, Frederic Dubois, Catherine Gaudy-Graffin** (2015//). Usefulness of a fourth generation ELISA assay for the reliable identification of HCV infection in HIV-positive adults from Gabon (Central Africa). *PloS one*, 10(1), e0116975

**Fu-Rong Ren, Qiu-Shuang Lv, Hui Zhuang, Jing-Jing Li, Xiao-Yan Gong, Guo-Jing Gao, Chang-Li Liu, Jing-Xing Wang, Fu-Zhu Yao, You-Rong Zheng, Fa-Ming Zhu, Mei-Hei-Li Tiemuer, Xu-Hua Bai, Hua Shan** (2005//). Significance of the signal-to-cutoff ratios of anti-hepatitis C virus enzyme immunoassays in screening of Chinese blood donors. *Transfusion*, 45(11), 1816

**Fabrizi F., Raffaele I., Guarnori I., Bacchini G., Marai P., Erba G., Locatelli F.** (1995//). Comparison of second-generation screening and confirmatory assays with recombinant antigens and synthetic peptides against antibodies to hepatitis C virus: A study in penal patients *Nephron*, 69(4), 444

**Fierz W.** (1997//). Serologic testing for HBsAg, hepatitis C and HIV 1 and 2 using the COBAS core II immunochemistry analyser *Clinical Laboratory*,

43(3), 147

**Filice G., Patruno S., Campisi D., Chiesa A., Orsolini P., Debiaggi M., Bruno R., Tinelli M.** (1993//). Specificity and sensitivity of 3rd generation EIA for detection of HCV antibodies among intravenous drug-users *The new microbiologica : official journal of the Italian Society for Medical, Odontoiatric, and Clinical Microbiology (SIMMOC)*, 16(1), 35

**G E Abdelnour, G M Matar, H M Sharara, A M Abdelnoor** (1997//). Detection of anti-hepatitis C-virus antibodies and hepatitis C-virus RNA in Lebanese hemodialysis patients. *European journal of epidemiology*, 13(8), 863

**G J Kotwal, B M Baroudy, I K Kuramoto, F F McDonald, G M Schiff, P V Holland, J B Zeldis** (1992//). Detection of acute hepatitis C virus infection by ELISA using a synthetic peptide comprising a structural epitope. *Proceedings of the National Academy of Sciences of the United States of America*, 89(10), 4486

**Hussein M.M., Mooij J.M., Hegazy M.S., Bamaga M.S.** (2007//). The impact of polymerase chain reaction assays for the detection of hepatitis C virus infection in a hemodialysis unit *Saudi journal of kidney diseases and transplantation : an official publication of the Saudi Center for Organ Transplantation, Saudi Arabia*, 18(1), 107

**H B Krarup, S E Jacobsen, K Varming, A M Drewes, P H Madsen** (1998//). Performance of hepatitis C virus (HCV) antibody test systems in relation to HCV-RNA detection in the diagnosis of HCV infection. *Danish medical bulletin*, 45(1), 89

**H Maniwa, Y Miyake, T Oda, R Li, T Yokoyama, K Sugiyama** (1997//). Second generation hepatitis C virus antibody-positive rate in children: investigation of the route of hepatitis C virus infection in children with no history of transfusion. *Acta paediatrica Japonica; Overseas edition*, 39(5), 550

**H Vrieling, C L van der Poel, H W Reesink, P N Lelie** (1995//). Comparison of two anti-hepatitis C virus enzyme-linked immunosorbent assays: Wellcozyme VK45 and Ortho 2.0. *Infusionstherapie und Transfusionsmedizin*, 22(3), 164

**Hao-Hsi Kao, Kuo-Su Chen, Chih-Lang Lin, Jia-Jang Chang, Chien-Hung Lee** (2015//). Utilization of Signal-to-Cutoff Ratio of Hepatitis C Virus Antibody Assay in Predicting HCV Viremia among Hemodialysis Patients. *Nephron*, 130(2), 127

**Helge Myrnel, Vasanthan Navaratnam, Birgitta Asjo** (2005//). Detection of antibodies to hepatitis C virus: false-negative results in an automated chemiluminescent microparticle immunoassay

(ARCHITECT Anti-HCV) compared to a microparticle enzyme immunoassay (AxSYM HCV Version 3.0). *Journal of clinical virology : the official publication of the Pan American Society for Clinical Virology*, 34(3), 211

**J Ding, T Akira, Y Noriko, T Mikihiro, D Takayasu** (1998//). Study of hepatitis C virus genotype in Guizhou area of southwestern China. *Chinese medical journal*, 111(2), 128

**J M Pawlotsky, I Lonjon, C Hezode, B Raynard, F Darthuy, J Remire, C J Soussy, D Dhumeaux** (1998//). What strategy should be used for diagnosis of hepatitis C virus infection in clinical laboratories?. *Hepatology (Baltimore, Md.)*, 27(6), 1700

**J T Wang, T H Wang, J C Sheu, S J Tsai, Y S Hsieh, D T Lin, C Y Wang, D S Chen** (1993//). Hepatitis C virus infection in volunteer blood donors in Taiwan. Evaluation by hepatitis C antibody assays and the polymerase chain reaction. *Archives of pathology & laboratory medicine*, 117(2), 152

**Jeannette M Watterson, Paulina Stallcup, David Escamilla, Patrick Chernay, Alfred Reyes, Sylvia C Trevino** (2007//). Evaluation of the Ortho-Clinical Diagnostics Vitros ECi Anti-HCV test: comparison with three other methods. *Journal of clinical laboratory analysis*, 21(3), 162

**Jose M Echevarria, Ana Avellon, Gesa Jonas, Michael Hausmann, Angela Vockel, Hans-Peter Kapprell** (2006//). Sensitivity of a modified version of the ARCHITECT Anti-HCV test in detecting samples with immunoblot-confirmed, low-level antibody to hepatitis C virus. *Journal of clinical virology : the official publication of the Pan American Society for Clinical Virology*, 35(4), 368

**Juan I Esteban, Josef van Helden, Flora Alborino, Philippe Burgisser, Cristina Cellerai, Giuseppe Pantaleo, Adolfo Eiras, Maria I Rodriguez, Valeria Ghisetti, Michael Gleich, Roland Imdahl, Claudia Kaiser, Petra Moller, Olaf Wetitzky, Manuel Segovia, Harald Schennach, Annelies Muhlbacher** (2013//). Multicenter evaluation of the Elecsys anti-HCV II assay for the diagnosis of hepatitis C virus infection. *Journal of medical virology*, 85(8), 1362

**Janot C., Courouge A.M., Barin F., Lunel-Fabiani F., Trepo C., Botte C.** (1994//). Screening tests of anti-HCV antibodies used in France. Analysis of sensitivity *Transfusion clinique et biologique : journal de la Societe francaise de transfusion sanguine*, 1(4), 295

**Kim Y.S., Lee H.S., Ahn Y.O.** (1999//). Factors associated with positive predictability of the anti-

HCV ELISA method with confirmatory RT-PCR  
*Journal of Korean medical science*, 14(6), 629

**King S., Adjei-Asante K., Appiah L., Adinku D., Beloukas A., Atkins M., Sarfo S.F., Chadwick D., Phillips R.O., Geretti A.M.** (2015//). Antibody screening tests variably overestimate the prevalence of hepatitis C virus infection among HIV-infected adults in Ghana *Journal of Viral Hepatitis*, 22(5), 461

**Kaori Morota, Ryo Fujinami, Hideki Kinukawa, Taiji Machida, Kenichi Ohno, Haruhisa Saegusa, Katsumichi Takeda** (2009//). A new sensitive and automated chemiluminescent microparticle immunoassay for quantitative determination of hepatitis C virus core antigen. *Journal of virological methods*, 157(1), 8

**Liu D., Steele J., Lloyd Jones S., Leslie D., Pedersen J., Baird R.** (1996//). Comparative evaluation of Abbott and Murex antibody assays and Roche Amplicor PCR for diagnosis of human hepatitis C *Serodiagnosis and Immunotherapy in Infectious Disease*, 8(2), 121

**L Mazzotta, G Landucci, L Pfanner, A Carlini, D Angelini, R Giusti, A Antonelli** (1992//). Comparison between first and second generation tests to determine the frequency of anti-HCV antibodies in uremic patients in replacement dialytic therapy. *Nephron*, 61(3), 354

**M Beld, M Penning, M van Putten, V Lukashov, A van den Hoek, M McMorro, J Goudsmit** (1999//). Quantitative antibody responses to structural (Core) and nonstructural (NS3, NS4, and NS5) hepatitis C virus proteins among seroconverting injecting drug users: impact of epitope variation and relationship to detection of HCV RNA in blood. *Hepatology (Baltimore, Md.)*, 29(4), 1288

**M de Medina, C Ortiz, C Krenc, J Leete, D Vallari, M Hill, S LaRue, M Jimenez, W Anderson, E Schiff** (1992//). Improved detection of antibodies to hepatitis C virus in dialysis patients using a second-generation enzyme immunoassay. *American journal of kidney diseases : the official journal of the National Kidney Foundation*, 20(6), 589

**M Schroter, P Schafer, B Zollner, S Polywka, R Laufs, H H Feucht** (2001//). Strategies for reliable diagnosis of hepatitis C infection: the need for a serological confirmatory assay. *Journal of medical virology*, 64(3), 320

**Marcel Miedouge, Karine Saune, Nassim Kamar, Martine Rieu, Lionel Rostaing, Jacques Izopet** (2010//). Analytical evaluation of HCV core antigen and interest for HCV screening in haemodialysis patients. *Journal of clinical virology : the official*

*publication of the Pan American Society for Clinical Virology*, 48(1), 18

**Mario J Grijalva, Rosa F Chiriboga, Hans Vanhassel, Laura Arcos-Teran** (2005//). Improving the safety of the blood supply in Ecuador through external performance evaluation of serological screening of blood donors. *Journal of clinical virology : the official publication of the Pan American Society for Clinical Virology*, 34 Suppl 2(#issue#), S47

**Mifumi Kita, Matsuo Deguchi, Masanori Kagita, Nori Yoshioka, Eiji Kobayashi, Mikio Watanabe, Seishi Asari, Kiyoharu Yamanaka, Yoshinori Iwatani** (2009//). Clinical utility and characteristics of nine anti-HCV antibody screening reagents used in Japan. *Clinical laboratory*, 55(1-2), 9

**N Bouzgarrou, I Fodha, S Ben Othman, A Achour, F Grattard, A Trabelsi, B Pozzetto** (2005//). Evaluation of a total core antigen assay for the diagnosis of hepatitis C virus infection in hemodialysis patients. *Journal of medical virology*, 77(4), 502

**Nasreen Khan, Sali Aswad, Hamid Shidban, Mehbobeh Aghajani, Ralph Mendez, Robert Mendez, Lorraine Comanor** (2004//). Improved detection of HCV Infection in hemodialysis patients using a new HCV RNA qualitative assay: experience of a transplant center. *Journal of clinical virology : the official publication of the Pan American Society for Clinical Virology*, 30(2), 175

**Nouhoum Bouare, Dolores Vaira, Andre Gothot, Jean Delwaide, Sebastien Bontems, Laurence Seidel, Paul Gerard, Christiane Gerard** (2012//). Prevalence of HIV and HCV infections in two populations of Malian women and serological assays performances. *World journal of hepatology*, 4(12), 365

**Nubling C.M., Unger G., Chudy M., Raia S., Lower J.** (2002//). Sensitivity of HCV core antigen and HCV RNA detection in the early infection phase *Transfusion*, 42(8), 1037

**Odari E.O., Budambula N.L., Nitschko H.** (2014//). Evaluation of an antigen-antibody "combination" enzyme linked immunosorbent assay for diagnosis of hepatitis C virus infections *Ethiopian journal of health sciences*, 24(4), 343

**Oguchi H., Miyasaka M., Tokunaga S., Hora K., Ichikawa S., Ochi T., Yamada K., Nagasawa M., Kanno Y., Aizawa T., Watanabe H., Yoshizawa S., Sato K., Terashima M., Yoshie T., Oguchi S., Tanaka E., Kiyosawa K., Furuta S.** (1992//). Hepatitis virus infection (HBV and HCV) in eleven



Japanese hemodialysis units *Clinical Nephrology*, 38(1), 36

**Panigrahi A.K., Nayak B., Dixit R., Acharya S.K., Panda S.K.** (1998//). Evaluation of third generation anti-HCV enzyme immunoassays *Tropical gastroenterology : official journal of the Digestive Diseases Foundation*, 19(3), 105

**P Dentico, A Volpe, R Buongiorno, C Manno, S Carabellese, L Monno, G Pastore** (1995//). HCV third generation test in hemodialysis patients. *The Italian journal of gastroenterology*, 27(6), 300

**P Goubau, M Reynders, K Beuselinck, F Nevens, K Peerlinck, J Desmyter** (1997//). Confirmatory strategy of hepatitis C serology based on two screening assays in a diagnostic setting. *Acta clinica Belgica*, 52(1), 31

**P Leon, J A Lopez, C Domingo, J M Echevarria** (1993//). Evaluation of laboratory assays for screening antibody to hepatitis C virus. *Transfusion*, 33(3), 268

**Raghuraman S., Subramaniam T., Daniel D., Sridharan G., Abraham P.** (2003//). Occurrence of false positives during testing for antibodies to hepatitis C virus among volunteer blood donors in India *Journal of Clinical Microbiology*, 41(4), 1788

**Reesink H.W., van der Poel C.L., Cuypers H.T., Lelie P.N.** (1992//). HCV and blood transfusion *Archives of virology. Supplementum*, 4(#issue#), 241

**Rochlani M., Lewis J.H., Ramsey G.E., Bontempo F.A., Shah G., Bowman R.A., Van Thiel D.H., Starzl T.E.** (1992//). Hepatitis C testing: Comparison of Ortho's EIA and RIBA II tests in 1,182 patients undergoing primary liver transplantation *American Journal of Clinical Pathology*, 98(1), 8

**R Paolini, P Marson, M Vicarioto, G Ongaro, M Viero, A Girolami** (1994//). Anti-hepatitis C virus serology in patients affected with congenital coagulation defects: a comparative study using three second generation ELISA tests. *Transfusion science*, 15(3), 303

**R Soffredini, M Rumi, P Lampertico, A Aroldi, A Tarantino, C Ponticelli, M Colombo** (1996//). Increased detection of antibody to hepatitis C virus in renal transplant patients by third-generation assays. *American journal of kidney diseases : the official journal of the National Kidney Foundation*, 28(3), 437

**Recep Kesli, Hakki Polat, Yuksel Terzi, Muhammet Guzel Kurtoglu, Yavuz Uyar** (2011//). Comparison of a newly developed

automated and quantitative hepatitis C virus (HCV) core antigen test with the HCV RNA assay for clinical usefulness in confirming anti-HCV results. *Journal of clinical microbiology*, 49(12), 4089

**S Lee, J McHutchinson, B Francis, R DiNello, A Polito, S Quan, M Nelles** (1992//). Improved detection of antibodies to hepatitis C virus using a second generation ELISA. *Advances in experimental medicine and biology*, 312(#issue#), 183

**S Polywka, P Kaars-Wiele, E Schroeter, J Mandler, R Laufs** (1992//). Detection of antibodies to HCV: comparison of a c100-3 EIA and the 2nd generation EIA. *Beitrage zur Infusionstherapie = Contributions to infusion therapy*, 30(#issue#), 42

**S Uyttendaele, H Claeys, W Mertens, H Verhaert, C Vermeylen** (1994//). Evaluation of third-generation screening and confirmatory assays for HCV antibodies. *Vox sanguinis*, 66(2), 122

**Server Yagci, Elizaveta Padalko** (2012//). Comparison of monolisa HCV Ag/Ab ULTRA with two anti-HCV assays for the detection of HCV infection in hospital setting. *Current microbiology*, 64(2), 148

**Sinyoung Kim, Jeong-Ho Kim, Seoyoung Yoon, Youn-Hee Park, Hyon-Suk Kim** (2008//). Clinical performance evaluation of four automated chemiluminescence immunoassays for hepatitis C virus antibody detection. *Journal of clinical microbiology*, 46(12), 3919

**Tabler L.H., Tegtmeyer G., Stramer S.L., Qnan S., Dockter J., Giachetti C., Busch M.P.** (2000//). Lookback on donors who are repeatedly reactive on first-generation hepatitis C virus assays: Justification and rational implementation *Transfusion*, 40(1), 15

**Vanhommerig J.W., van de Laar T.J., Koot M., van Rooijen M.S., Schinkel J., Speksnijder A.G., Prins M., de Vries H.J., Bruisten S.M.** (2015//). Evaluation of a hepatitis C virus (HCV) antigen assay for routine HCV screening among men who have sex with men infected with HIV *Journal of virological methods*, 213(#issue#), 147

**Vidales-Braz B.M., Da Silva N.M.O., Lobato R., Germano F.N., Da Mota L.D., Barros E.J.G., De Martinez A.M.B.** (2015//). Detection of hepatitis C virus in patients with terminal renal disease undergoing dialysis in southern Brazil: Prevalence, risk factors, genotypes, and viral load dynamics in hemodialysis patients *Virology Journal*, 12(1), no pagination

**V A dos Santos, R S Azevedo, M E Camargo, V A**



1  
2  
3 **Alves** (1999//). Serodiagnosis of hepatitis C virus.  
4 Effect of new evaluation of cutoff values for  
5 enzyme-linked immunosorbent assay in Brazilian  
6 patients. *American journal of clinical pathology*,  
7 112(3), 418

8  
9 **V Lakshmi, A K Reddy, K V Dakshinamurty**  
10 (2007//). Evaluation of commercially available  
11 third-generation anti-hepatitis C virus enzyme-  
12 linked immunosorbent assay in patients on  
13 haemodialysis. *Indian journal of medical*  
14 *microbiology*, 25(2), 140

15 **Vincenzo Bossi, Claudio Galli** (2004//).  
16 Quantitative signal of anti-HCV by an automated  
17 assay predicts viremia in a population at high  
18 prevalence of hepatitis C virus infection. *Journal of*  
19 *clinical virology : the official publication of the Pan*  
20 *American Society for Clinical Virology*, 30(1), 45

21 **W Prohaska, E Schroeter, P Kaars-Wiele, K**  
22 **Kleesiek** (1992//). Enzyme immunoassays for  
23 anti-hepatitis C virus antibodies improved  
24 specificity and analytical sensitivity by combination  
25 of three different recombinant viral proteins in  
26 second generation tests. *European journal of*  
27 *clinical chemistry and clinical biochemistry : journal*  
28 *of the Forum of European Clinical Chemistry*  
29 *Societies*, 30(7), 397

30 **Wafaa M El-Emshaty, Douaa Raafat, Doaa M**  
31 **Elghannam, Niveen Saudy, Ehab E Eltoraby, Abd**  
32 **Elhameed A Metwalli** (2011//). Diagnostic  
33 Performance of an Immunoassay for Simultaneous  
34 Detection of Hcv Core Antigen and Antibodies  
35 among Haemodialysis Patients. *Brazilian journal of*  
36 *microbiology : [publication of the Brazilian Society*  
37 *for Microbiology]*, 42(1), 303

38 **Watson H.G., Ludlam C.A., Rebus S., Zhang**  
39 **L.Q., Peutherer J.F., Simmonds P.** (1992//). Use of  
40 several second generation serological assays to  
41 determine the true prevalence of hepatitis C virus  
42 infection in haemophiliacs treated with non-virus  
43 inactivated factor VIII and IX concentrates *British*  
44 *Journal of Haematology*, 80(4), 514

45 **Yoo S.J., Wang L.L., Ning H.-C., Tao C.M., Hirankarn**  
46 **N., Kuakarn S., Yang R., Han T.H., Chan**  
47 **R.C., Hussain B.M., Hussin H., Muliaty D., Shen**  
48 **L., Liu H., Wei L.** (2015//). Evaluation of the  
49 Elecsys() Anti-HCV II assay for routine hepatitis C  
50 virus screening of different Asian Pacific  
51 populations and detection of early infection *Journal*  
52 *of clinical virology : the official publication of the*  
53 *Pan American Society for Clinical Virology*,  
54 64(#issue#), 20

#### 55 56 **4. Is the (screening) INDEX TEST** 57 **one of the following?** 58 59 60

**A Giulivi, M T Aye, E Gray, V Scalia, P Gill, G**  
**Cheng** (1992//). Anti-hepatitis C virus (HCV)  
screening at a Canadian Red Cross center:  
significance of a positive c100 HCV enzyme-linked  
immunosorbent assay. *Transfusion*, 32(4), 309

**A Palacios, L Taylor, L Haue, R B Luftig, K A**  
**Visona** (1999//). Development of low cost  
peptide-based anti-hepatitis C virus screening and  
confirmatory assays: comparison with  
commercially available tests. *Journal of medical*  
*virology*, 58(3), 221

**A Sato, N Ida, M Ishikawa, K Tanahashi, H**  
**Nakamura, Y Sho, T Arima, T Kunitomo**  
(1993//). A sensitive serodiagnosis of hepatitis C  
virus (HCV) infection with two non-fused peptides:  
comparison of antibody responses detected with a  
newly developed assay and a commercial second-  
generation test. *Microbiology and immunology*,  
37(4), 295

**Bludau H., Thome-Kromer B., Braun**  
**H.B., Gultekin H., Knoller B., Borelli G., Scudeller**  
**G., Galli C.** (1995//). Evaluation of a fully  
automated IMx HCV assay for the detection of  
antibody to hepatitis C virus *Klinisches Labor*,  
41(10), 777

**B C Dow, I Coote, H Munro, F McOmish, P L Yap,**  
**P Simmonds, E A Follett** (1993//). Confirmation  
of hepatitis C virus antibody in blood donors.  
*Journal of medical virology*, 41(3), 215

**D Mvere, N T Constantine, E Katsawde, O**  
**Tobaiwa, S Dambire, P Corcoran** (1996//). Rapid  
and simple hepatitis assays: encouraging results  
from a blood donor population in Zimbabwe.  
*Bulletin of the World Health Organization*, 74(1), 19

**G J Dawson, R R Lesniewski, J L Stewart, K M**  
**Boardway, R A Gutierrez, L Pendy, R G Johnson,**  
**X Alcalde, K V Rote, S G Devare** (1991//).  
Detection of antibodies to hepatitis C virus in U.S.  
blood donors. *Journal of clinical microbiology*,  
29(3), 551

**Gessoni G., Manoni F., Dolci L., Valverde S., Antico**  
**F., Piacentini I.** (1997//). Relevance of anti-HCV  
antibody (IgG and IgM) and HCV-RNA in diagnosis  
of HCV infection *Alpe Adria Microbiology Journal*,  
6(1-2), 35

**H Vrieling, H W Reesink, P J van den Burg, H L**  
**Zaaijer, H T Cuypers, P N Lelie, C L van der Poel**  
(1997//). Performance of three generations of anti-  
hepatitis C virus enzyme-linked immunosorbent  
assays in donors and patients. *Transfusion*, 37(8),  
845

**H Y Zhang, I K Kuramoto, D Mamish, K Sazama, P V Holland, J B Zeldis** (1993//). Hepatitis C virus in blood samples from volunteer donors. *Journal of clinical microbiology*, 31(3), 606

**Janot C., Courouze A.M., Boudart D., Cotte C., Elghouzzi M.H., Jullien A.M., Lemaire J.M., Maisonneuve P., Maniez-Montreuil M., Mattlinger B.** (1992//). Analytical study of the Abbott and Ortho tests for screening and confirmation of anti-HCV antibodies. Le groupe de Travail "Hepatitis virales" de la Societe Francaise de Transfusion Sanguine *Revue francaise de transfusion et d'hemobiologie : bulletin de la Societe nationale de transfusion sanguine*, 35(3), 171

**Jha J., Arankalle V.A., Banerjee K.** (1995//). Hepatitis C virus RNA positivity among RIBA-3 indeterminates *Vox sanguinis*, 69(2), 145

**J C Sheu, J T Wang, T H Wang, C Y Wang, P M Yang, G T Huang, L N Shih, H S Lee, D S Chen** (1993//). Prevalence of hepatitis C viral infection in a community in Taiwan. Detection by synthetic peptide-based assay and polymerase chain reaction. *Journal of hepatology*, 17(2), 192

**J D Callahan, N T Constantine, P Kataaha, X Zhang, K C Hyams, J Bansal** (1993//). Second generation hepatitis C virus assays: performance when testing African sera. *Journal of medical virology*, 41(1), 35

**J G McHutchison, J L Person, S Govindarajan, B Valinluck, T Gore, S R Lee, M Nelles, A Polito, D Chien, R DiNello** (1992//). Improved detection of hepatitis C virus antibodies in high-risk populations. *Hepatology (Baltimore, Md.)*, 15(1), 19

**Jung-Ah Kwon, Hyeseon Lee, Kap No Lee, Kwangchun Chae, Seram Lee, Dong-Ki Lee, Soyoun Kim** (2008//). High diagnostic accuracy of antigen microarray for sensitive detection of hepatitis C virus infection. *Clinical chemistry*, 54(2), 424

**Kolho E.** (1992//). Specificity and sensitivity of first and second generation anti-HCV ELISA in a low prevalence population *Transfusion medicine (Oxford, England)*, 2(3), 239

**Kolho E., Naukkarinen R., Krusius T.** (1994//). Specificity and sensitivity of two second-generation enzyme-linked immunosorbent assays for antibodies to hepatitis C virus in blood donor screening *Transfusion*, 34(1), 85

**K L MacDonald, W A Mills, R C Wood, M Hanson, W Kline, R J Bowman, H F Polesky, A E Williams, M T Osterholm** (1994//). Evaluation of clinical and laboratory aspects of antibody tests for

detection of hepatitis C virus infection in blood donors and recipients from a low-risk population. *Transfusion*, 34(3), 202

**Polito A.J., DiNello R.K., Quan S., Andrews W., Rose J., Lee F., Nelles M., Lee S.** (1992//). New-generation RIBA hepatitis C strip immunoblot assays *Beitrag zur Infusionstherapie = Contributions to infusion therapy*, 30(#issue#), 17

**M Bonaguide-Magniaux, C Pilette, F Oberti, M L Bidet, P Cales** (1996//). [Follow-up of blood donors with positive serology for hepatitis C virus and their recipients is insufficient]. *Gastroenterologie clinique et biologique*, 20(8-9), 663

**M H Sayers, D R Gretch** (1993//). Recombinant immunoblot and polymerase chain reaction testing in volunteer whole blood donors screened by a multi-antigen assay for hepatitis C virus antibodies. *Transfusion*, 33(10), 809

**N Yuki, N Hayashi, T Kamada** (1993//). Detection of HCV infection with second-generation assays. *Lancet (London, England)*, 341(8854), 1216

**R K Chaudhary, C Maclean** (1993//). Detection of antibody to hepatitis C virus by second-generation enzyme immunoassay. *American journal of clinical pathology*, 99(6), 702

**S C Anderson, T Hathaway, I K Kuramoto, P V Holland, R Gilcher, T Koch, S Hojvat** (1995//). Comparison of two second-generation anti-hepatitis C virus ELISA on 21431 US blood donor samples. *Journal of viral hepatitis*, 2(1), 55

**S K Aoki, I K Kuramoto, S Anderson, V Schoening, R Rodriguez, L Fernando, K Sazama, P V Holland** (1994//). Evidence that use of a second-generation hepatitis C antibody assay prevents additional cases of transfusion-transmitted hepatitis. *Journal of viral hepatitis*, 1(1), 73

**S Kleinman, H Alter, M Busch, P Holland, G Tegtmeier, M Nelles, S Lee, E Page, J Wilber, A Polito** (1992//). Increased detection of hepatitis C virus (HCV)-infected blood donors by a multiple-antigen HCV enzyme immunoassay. *Transfusion*, 32(9), 805

**S R Lee, C L Wood, M J Lane, B Francis, C Gust, C M Higgs, M J Nelles, A Polito, R DiNello, D Achord** (1995//). Increased detection of hepatitis C virus infection in commercial plasma donors by a third-generation screening assay. *Transfusion*, 35(10), 845

**T J Tucker, M Voigt, A Bird, S Robson, B Gibbs, J**

**Kannemeyer, M Galloway, R E Kirsch, H Smuts** (1997//). Hepatitis C virus infection rate in volunteer blood donors from the Western Cape-- comparison of screening tests and PCR. *South African medical journal = Suid-Afrikaanse tydskrif vir geneeskunde*, 87(5), 603

**T Kodama, S Ichiyama, K Sato, T Nada, N Nakashima** (1998//). Evaluation of a membrane filter assay system, Ortho HCV Ab Quick Pack, for detection of anti-hepatitis C virus antibody. *Journal of clinical microbiology*, 36(5), 1439

**T Tanaka, J Y Lau, M Mizokami, E Orito, E Tanaka, K Kiyosawa, K Yasui, Y Ohta, A Hasegawa, S Tanaka** (1995//). Simple fluorescent enzyme immunoassay for detection and quantification of hepatitis C viremia. *Journal of hepatology*, 23(6), 742

**Y Lazizi** (1994//). Discordance between four second-generation enzyme immunoassay kits in anti-hepatitis C virus screening. The Study Group of the Laboratoires de Virologie des Centres Hospitaliers Universitaires francais. *European journal of clinical microbiology & infectious diseases : official publication of the European Society of Clinical Microbiology*, 13(3), 280

**Weise W., Backer U., Seidl S., Flacke H., Sondag D., Pirene H., Schroeter E., Troonen H., Broeksma C., Heyermann H.** (1992//). Abbott HCV EIA 2nd generation: a new screening assay *Beitrag zur Infusionstherapie = Contributions to infusion therapy*, 30(#issue#), 34

## 5. Is the (comparator) REFERENCE TEST one of the following?

**Nahed Ismail, Geoffrey E Fish, Michael B Smith** (2004//). Laboratory evaluation of a fully automated chemiluminescence immunoassay for rapid detection of HBsAg, antibodies to HBsAg, and antibodies to hepatitis C virus. *Journal of clinical microbiology*, 42(2), 610

## 6. Does the study report on the following OUTCOMES? (Tick all that apply)

## 7. Is the SETTING representative of primary care?

**Pierre Zachary, Murielle Ullmann, Saadi Djeddi, Nicolas Meyer, Marie-Josée Wendling, Evelyne Schvoerer, Françoise Stoll-Keller, Jean-Pierre Gut** (2005//). Evaluation of three commercially

available hepatitis C virus antibody detection assays under the conditions of a clinical virology laboratory. *Journal of clinical virology : the official publication of the Pan American Society for Clinical Virology*, 34(3), 207

## 8. Does the study take place in a country with a LOW OR MODERATE (<3.5%) PREVALENCE of chronic HCV infection?

### Level 2: Full Text Review

#### 1. Is the full-text article available for review?

#### 2. What language is this article written in?

**Ecemis T., Akcali S., Erbay Dundar P., Sanlidag T.** (2012//). The threshold value of anti-HCV test in the diagnosis of HCV infection *Turkiye Klinikleri Journal of Medical Sciences*, 32(6), 1648

**Suslov A.P., Kuzin S.N., Golosova T.V., Shalunova N.V., Malyshev N.A., Sadikova N.V., Vavilova L.M., Somova A.V., Musina E.E., Ivanova M.V., Kipor T.T., Timonin I.M., Kuzina L.E., Godkov M.A., Bajenov A.I., Nesterenko V.G.** (2002//). Limits of diagnostic accuracy of anti-hepatitis C virus antibodies detection by ELISA and immunoblot assay *Russian journal of immunology : RJI : official journal of Russian Society of Immunology*, 7(2), 175

#### 3. Is it or does it include an original validation study of a blood-based qualitative immunoassay for hepatitis C?

**Kaur H., Manjari M., Thaman R.G., Singh G.** (2012//). Prevalence of markers of Hepatitis C virus among the blood donors *Journal of Clinical and Diagnostic Research*, 6(6), 959

#### 4. What TYPE OF PUBLICATION is it?

#### 5. Is the STUDY POPULATION comprised of asymptomatic, non-pregnant adults (aged 18+ years) with unknown HCV status and

## unknown liver enzyme values, and at average risk of HCV infection?

**A D Kitchen, N V Tucker** (1995//). The specificity of anti-HCV supplementary assays. *Vox sanguinis*, 69(2), 100

**Annemarie Berger, Holger Rabenau, Regina Allwinn, Hans Wilhelm Doerr** (2008//). Evaluation of the new ARCHITECT anti-HCV screening test under routine laboratory conditions. *Journal of clinical virology : the official publication of the Pan American Society for Clinical Virology*, 43(2), 158

**B Seignerres, F Descamps, R Croise, V Barlet, M Bouvier-Alias, S Chevaliez, J M Pawlotsky, W Abdelhady, M Rafik, A M Avellon, J M Echevarria, M Hausmann, J-M Dugua** (2016//). Multicenter clinical evaluation of the new 3rd generation assay for detection of antibodies against hepatitis C virus on the VIDAS() system. *Journal of clinical virology : the official publication of the Pan American Society for Clinical Virology*, 78(#issue#), 20

**Benjamin Maasoumy, Birgit Bremer, Regina Raupach, Patrick Lehmann, Michael P Manns, Markus Cornberg, Heiner Wedemeyer** (2014//). How to interpret borderline HCV antibody test results: a comparative study investigating four different anti-HCV assays. *Viral immunology*, 27(1), 7

**C Berasain, M Garcia-Granero, J I Riezu-Boj, M P Civeira, J Prieto, F Borrás-Cuesta** (1993//). Detection of anti-hepatitis C virus antibodies by ELISA using synthetic peptides. *Journal of hepatology*, 18(1), 80

**C Colin, D Lanoir, S Touzet, L Meyaud-Kraemer, F Bailly, C Trepo, HEPATITIS Group** (2001//). Sensitivity and specificity of third-generation hepatitis C virus antibody detection assays: an analysis of the literature. *Journal of viral hepatitis*, 8(2), 87

**D Lavanchy, C Mayerat, B Morel, P Schneider, C Zufferey, J J Gonvers, A Pecoud, P C Frei** (1994//). Evaluation of third-generation assays for detection of anti-hepatitis C virus (HCV) antibodies and comparison with presence of HCV RNA in blood donors reactive to c100-3 antigen. *Journal of clinical microbiology*, 32(9), 2272

**D Lavanchy, J Steinmann, A Moritz, P C Frei** (1996//). Evaluation of a new automated third-generation anti-HCV enzyme immunoassay. *Journal of clinical laboratory analysis*, 10(5), 269

**D Robert Dufour, Mageli Talastas, Maria D A Fernandez, Barbara Harris** (2003//). Chemiluminescence assay improves specificity of hepatitis C antibody detection. *Clinical chemistry*, 49(6 Pt 1), 940

**Dinesh O Shah, Chi D Chang, Lily X Jiang, Kevin Y Cheng, A Scott Muerhoff, Robin A Gutierrez, Thomas P Leary, Suresh M Desai, Irene V Batac-Herman, Vince A Salbilla, Alla S Haller, James L Stewart, George J Dawson** (2003//). Combination HCV core antigen and antibody assay on a fully automated chemiluminescence analyzer. *Transfusion*, 43(8), 1067

**Elliot Eli Dogbe, Fareed Arthur** (2015//). Diagnostic accuracy of blood centers in the screening of blood donors for viral markers. *The Pan African medical journal*, 20(#issue#), 119

**F Ansaldi, B Bruzzone, G Testino, M Bassetti, R Gasparini, P Crovari, G Icardi** (2006//). Combination hepatitis C virus antigen and antibody immunoassay as a new tool for early diagnosis of infection. *Journal of viral hepatitis*, 13(1), 5

**F Ferrer, M J Candela, C Garcia, L Martinez, J Rivera, V Vicente** (1997//). A comparative study of two third-generation anti-hepatitis C virus ELISAs. *Haematologica*, 82(6), 690

**F Hmaied, M Ben Mamou, Z Arrouji, A Slim, S Ben Redjeb** (2007//). [Use of combined detection of hepatitis C virus core antigen and antibodies to reduce the serological window-phase]. *Pathologie-biologie*, 55(2), 121

**G Icardi, F Ansaldi, B M Bruzzone, P Durando, S Lee, C de Luigi, P Crovari** (2001//). Novel approach to reduce the hepatitis C virus (HCV) window period: clinical evaluation of a new enzyme-linked immunosorbent assay for HCV core antigen. *Journal of clinical microbiology*, 39(9), 3110

**H Cano, M J Candela, M L Lozano, V Vicente** (2003//). Application of a new enzyme-linked immunosorbent assay for detection of total hepatitis C virus core antigen in blood donors. *Transfusion medicine (Oxford, England)*, 13(5), 259

**H Hennig, P Schlenke, H Kirchner, I Bauer, B Schulte-Kellinghaus, H Bludau** (2000//). Evaluation of newly developed microparticle enzyme immunoassays for the detection of HCV antibodies. *Journal of virological methods*, 84(2), 181

**H Vrieling, H L Zaaijer, H W Reesink, C L van der Poel, H T Cuypers, P N Lelie** (1995//). Sensitivity and specificity of three third-generation anti-



hepatitis C virus ELISAs. *Vox sanguinis*, 69(1), 14

**K Aoyagi, C Ohue, K Iida, T Kimura, E Tanaka, K Kiyosawa, S Yagi** (1999//). Development of a simple and highly sensitive enzyme immunoassay for hepatitis C virus core antigen. *Journal of clinical microbiology*, 37(6), 1802

**L H Tobler, S R Lee, S L Stramer, J Peterson, R Kochesky, K Watanabe, S Quan, A Polito, M P Busch** (2000//). Performance of second- and third-generation RIBAs for confirmation of third-generation HCV EIA-reactive blood donations. Retrovirus Epidemiology Donor Study. *Transfusion*, 40(8), 917

**M Tsopanomichalou, M Ergazaki, D A Spandidos** (1997//). Evaluation of western blot in routine diagnosis of hepatitis C virus. *The International journal of biological markers*, 12(1), 35

**M da Silva Cardoso, K Koerner, S Epple, B Kubanek** (1993//). Prevalence of HCV-RNA-positive blood donors and correlation to ELISA and RIBA status. *Annals of hematology*, 66(3), 147

**M Schroter, H H Feucht, P Schafer, B Zollner, S Polywka, R Laufs** (1999//). Definition of false-positive reactions in screening for hepatitis C virus antibodies. *Journal of clinical microbiology*, 37(1), 233

**Menha Swellam, Magda Sayed Mahmoud, Adel Abdel-Fatah Ali** (2011//). Diagnosis of hepatitis C virus infection by enzyme-linked immunosorbent assay and reverse transcriptase-nested polymerase chain reaction: a comparative evaluation. *IUBMB life*, 63(6), 430

**Mohsan Saeed, Ryosuke Suzuki, Madoka Kondo, Hideki Aizaki, Takanobu Kato, Toshiaki Mizuochi, Takaji Wakita, Haruo Watanabe, Tetsuro Suzuki** (2009//). Evaluation of hepatitis C virus core antigen assays in detecting recombinant viral antigens of various genotypes. *Journal of clinical microbiology*, 47(12), 4141

**Par A., Kantor I., Barcsay E., Hollos I., Mezey I., Brojnas J., Takacs M., Hejjas M., Illes M., Szontagh L.** (1991//). Prevalence of antibody to hepatitis C virus in blood donors, high-risk groups and patients with liver diseases in Hungary. A multicentre study using ABBOTT EIA test and a comparison with an ORTHO ELISA test system *Acta medica Hungarica*, 48(3-4), 167

**P Bonanni, G C Icardi, A M Raffo, M Ferrari Bravo, A Roccatagliata, P Crovari** (1996//). Analytical and laboratory evaluation of a new fully-automated third generation enzyme immunoassay for the detection of antibodies to the hepatitis C

virus. *Journal of virological methods*, 62(2), 113

**P Kiely, D Wilson** (2000//). Results of HCV screening of volunteer blood donors with a chemiluminescent immunoassay and a second- or third-generation EIA: overlap of false-positive reactivity and its impact on donor management. *Transfusion*, 40(5), 580

**P Vermeersch, M Van Ranst, K Lagrou** (2010//). Evaluation of the use of a combined HCV antigen/antibody assay in routine laboratory practice. *Acta clinica Belgica*, 65(4), 245

**Philip Kiely, Kyall Walker, Susan Parker, Anthea Cheng** (2010//). Analysis of sample-to-cutoff ratios on chemiluminescent immunoassays used for blood donor screening highlights the need for serologic confirmatory testing. *Transfusion*, 50(6), 1344

**Pierpaolo Valcavi, Maria Cristina Medici, Francesca Casula, Maria Cristina Arcangeletti, Flora De Conto, Federica Pinardi, Adriana Calderaro, Carlo Chezzi, Giuseppe Dettori** (2004//). Evaluation of a total hepatitis C virus (HCV) core antigen assay for the detection of antigenaemia in anti-HCV positive individuals. *Journal of medical virology*, 73(3), 397

**S K Dhaliwal, L E Prescott, B C Dow, F Davidson, H Brown, P L Yap, E A Follett, P Simmonds** (1996//). Influence of viraemia and genotype upon serological reactivity in screening assays for antibody to hepatitis C virus. *Journal of medical virology*, 48(2), 184

**S R Lee, J Peterson, P Niven, C Bahl, E Page, R DeLeys, D Giordano-Schmidt, D Baggett, G Green** (2001//). Efficacy of a hepatitis C virus core antigen enzyme-linked immunosorbent assay for the identification of 'window-phase' blood donations. *Vox sanguinis*, 80(1), 19

**Son H.C., Yoon M.S., Kim Y.J., Kim I.H., Kim Y.S.** (2002//). Type-specific antibody for hepatitis C virus detected by use of NS-4 peptide and hepatitis C virus genome in Korea *Rinsho byori. The Japanese journal of clinical pathology*, 50(5), 533

**Susan L Stramer, Roger Y Dodd, Jaye P Brodsky** (2013//). The value of screening signal-to-cutoff ratios for hepatitis C virus antibody confirmation. *Transfusion*, 53(7), 1497

**T P Leary, R A Gutierrez, A S Muerhoff, L G Birkenmeyer, S M Desai, G J Dawson** (2006//). A chemiluminescent, magnetic particle-based immunoassay for the detection of hepatitis C virus core antigen in human serum or plasma. *Journal of*



1  
2  
3  
4  
5  
6  
7  
8  
9  
10  
11  
12  
13  
14  
15  
16  
17  
18  
19  
20  
21  
22  
23  
24  
25  
26  
27  
28  
29  
30  
31  
32  
33  
34  
35  
36  
37  
38  
39  
40  
41  
42  
43  
44  
45  
46  
47  
48  
49  
50  
51  
52  
53  
54  
55  
56  
57  
58  
59  
60

*medical virology*, 78(11), 1436

**Dow B.C., Follett E.A.C., Munro H., Buchanan I., Roy K., McOmish F., Yap P.L., Simmonds P.** (1994//). Failure of 2nd- and 3rd-generation HCV ELISA and RIBA to detect HCV polymerase chain reaction - Positive donations [2] *Vox Sanguinis*, 67(2), 236

**Hofmann H., Konczer A.** (1993//). Commercial test kits in diagnosis of hepatitis C *Serodiagnosis and Immunotherapy in Infectious Disease*, 5(2), 76

**Mixson-Hayden T., Dawson G.J., Teshale E., Le T., Cheng K., Drobeniuc J., Ward J., Kamili S.** (2015//). Performance of ARCHITECT HCV core antigen test with specimens from US plasma donors and injecting drug users *Journal of clinical virology : the official publication of the Pan American Society for Clinical Virology*, 66(#issue#), 15

**Muerhoff A.S., Jiang L., Shah D.O., Gutierrez R.A., Patel J., Garolis C., Kyrk C.R., Leckie G., Frank A., Stewart J.L., Dawson G.J.** (2002//). Detection of HCV core antigen in human serum and plasma with an automated chemiluminescent immunoassay *Transfusion*, 42(3), 349

**Oh E.-J., Chang J., Yang J.-Y., Kim Y., Park Y.-J., Han K.** (2013//). Different signal-to-cut-off ratios from three automated anti-hepatitis C virus chemiluminescence immunoassays in relation to results of recombinant immunoblot assays and nucleic acid testing *Blood Transfusion*, 11(3), 471

**Re V., Gallego S., Trevino E., Barbas G., Dominguez C., Elbarcha O., Bepre H., Contigiani M.** (2005//). Evaluation of five screening tests licensed in Argentina for detection of hepatitis C virus antibodies *Memorias do Instituto Oswaldo Cruz*, 100(3), 303

**Shirachi M., Sata M., Suzuki H., Fukuizumi K., Tanikawa K., Itoh Y., Mizumoto T., Kondoh S., Kasahara M., Manabe S.** (1998//). Evaluation of third generation anti-HCV test kit (SYNPEP HCV-EIA II) using sera of inhabitants from HCV hyperendemic area *The Kurume medical journal*, 45(1), 81

**Uyttendaele S., Claeys H., Mertens W., Verhuert H., Vermeylen C.** (1994//). Evaluation of third-generation screening and confirmatory assays for HCV antibodies *Vox Sanguinis*, 66(2), 122

**6. Is the (screening) INDEX TEST one of the following commercially-available immunoassays?**

**Alter H.J., Tegtmeier G.E., Jett B.W., Quan S., Shih J.W., Bayer W.L., Polito A.** (1991//). The use of a recombinant immunoblot assay in the interpretation of anti-hepatitis C virus reactivity among prospectively followed patients, implicated donors, and random donors *Transfusion*, 31(8), 771

**B Betlach, S Anderson, R Rodriguez, K Kuramoto, K Sazama, P V Holland** (1992//). Comparison of two approved enzyme immunoassays for the detection of antibodies to the hepatitis C virus in 5216 United States blood donors. *Transfusion*, 32(2), 191

**Diallo A., Lazizi Y., Le Guenno B., Pillot J.** (1991//). Non-specific reactions of the ELISA kit for the detection of blood donors infected with hepatitis C virus *Presse Medicale*, 20(8), 383

**C J Tibbs, S J Palmer, R Coker, S K Clark, G M Parsons, S Hojvat, D Peterson, J E Banatvala** (1991//). Prevalence of hepatitis C in tropical communities: the importance of confirmatory assays. *Journal of medical virology*, 34(3), 143

**Galel S.A., Strong D.M., Tegtmeier G.E., Holland P.V., Kuramoto I.K., Kemper M., Pietrelli L., Gallarda J.** (2002//). Comparative yield of HCV RNA testing in blood donors screened by 2.0 versus 3.0 antibody assays *Transfusion*, 42(11), 1507

**J P Allain, A Kitchen, S Aloysius, I Reeves, J Petrik, J A Barbara, L M Williamson** (1996//). Safety and efficacy of hepatitis C virus antibody screening of blood donors with two sequential screening assays. *Transfusion*, 36(5), 401  
**Ornopia G.L., Kuramoto K.** (1995//). Detection of anti-hepatitis C virus using chemiluminescence *Journal of Viral Hepatitis*, 2(4), 215

**W Prohaska, C Wolff, E Lechler, K Kleesiek** (1991//). High rate of false positives in blood donor screening for antibodies to hepatitis C virus. Cause of underestimation of virus transmission rate?. *Klinische Wochenschrift*, 69(7), 294

**7. STUDY DESIGN: was the REFERENCE TEST applied to both: 1) subjects who tested NEGATIVE on the INDEX TEST, AND 2) subjects who tested POSITIVE on the INDEX TEST?**

**Ali Acar, Sabri Kemahli, Husnu Altunay, Erdogan Kosan, Oral Oncul, Levent Gorenek, Saban Cavuslu** (2010//). The significance of repeat testing in Turkish blood donors screened with HBV, HCV and HIV immunoassays and the importance of S/CO ratios in the interpretation of

HCV/HIV screening test results and as a determinant for further confirmatory testing. *Transfusion medicine (Oxford, England)*, 20(3), 152

**Bruhn R., Lelie N., Busch M., Kleinman S., Vermeulen M., Reddy R., Bird A., Cable R., Goubran H., Mofthah F., El Ekiaby M., Ghiazza P., Manzini P., Favilli F., Peduzzi C., Roig R., Alvarez M., Sauleda S., Niederhauser C., Levicnik S., Nograski P., Wessberg S., Elkblom S., Lankinen M., Ulm H., Harritshoj L., Nielsen C., Jorgensen S., Erikstrup C., O'Riordan J., Brojer E., Grabarczyk P., Gdowska J., Piotrowski D., Lam S., Teo D., Chua S.S., Lin C.K., Tsoi W.C., Bon A.H., Peng S.L.T., Flanagan P., Brown S., Kiely P., Margaritis A.** (2015//). Relative efficacy of nucleic acid amplification testing and serologic screening in preventing hepatitis C virus transmission risk in seven international regions *Transfusion*, 55(6), 1195

**Clive R Seed, Angelo R Margaritis, Wayne V Bolton, Philip Kiely, Susan Parker, Lisa Piscitelli, Australian Red Cross Blood Service Virology Subcommittee of the National Donor and Product Safety Committee** (2003//). Improved efficiency of national HIV, HCV, and HTLV antibody testing algorithms based on sequential screening immunoassays. *Transfusion*, 43(2), 226

**F Alborino, A Burighel, F-W Tiller, J van Helden, C Gabriel, A Raineri, R Catapano, H Stekel** (2011//). Multicenter evaluation of a fully automated third-generation anti-HCV antibody screening test with excellent sensitivity and specificity. *Medical microbiology and immunology*, 200(2), 77

**Gesa Jonas, Claudia Pelzer, Christian Beckert, Michael Hausmann, Hans-Peter Kapprell** (2005//). Performance characteristics of the ARCHITECT anti-HCV assay. *Journal of clinical virology : the official publication of the Pan American Society for Clinical Virology*, 34(2), 97

**J Petitjean Lecherbonnier, S Gouarin, J Dina, A Vabret, F Freymuth** (2007//). [Hepatitis C virus screening: performances characteristics of a commercial automated chemiluminescent microparticle immunoassay (CMIA-ARCHITECT anti-HCV)]. *Pathologie-biologie*, 55(10), 512

**Lei Li, Pei-Jer Chen, Ming-Hung Chen, Kin-Fu Chak, Kuo-Sin Lin, Su-Jen Lin Tsai** (2008//). A pilot study for screening blood donors in Taiwan by nucleic acid amplification technology: detecting occult hepatitis B virus infections and closing the serologic window period for hepatitis C virus. *Transfusion*, 48(6), 1198

**Linda Sommese, Carmela Iannone, Francesco Cacciatore, Gustavo De Iorio, Claudio Napoli** (2014//). Comparison between screening and confirmatory serological assays in blood donors in a region of South Italy. *Journal of clinical laboratory analysis*, 28(3), 198

**Mohamed Abdel-Hamid, Mai El-Daly, Sherif El-Kafrawy, Nabil Mikhail, G Thomas Strickland, Alan D Fix** (2002//). Comparison of second- and third-generation enzyme immunoassays for detecting antibodies to hepatitis C virus. *Journal of clinical microbiology*, 40(5), 1656

**P Zachary, M Ullmann, S Djeddi, M-J Wendling, E Schvoerer, F Stoll-Keller, J-P Gut** (2004//). [Evaluation of two commercial enzyme immunoassays for diagnosis of hepatitis C in the conditions of a virology laboratory]. *Pathologie-biologie*, 52(9), 511

**Pieter Vermeersch, Marc Van Ranst, Katrien Lagrou** (2008//). Validation of a strategy for HCV antibody testing with two enzyme immunoassays in a routine clinical laboratory. *Journal of clinical virology : the official publication of the Pan American Society for Clinical Virology*, 42(4), 394

**Recep Kesli, M Ozdemir, M G Kurtoglu, M Baykan, B Baysal** (2009//). Evaluation and comparison of three different anti-hepatitis C virus antibody tests based on chemiluminescence and enzyme-linked immunosorbent assay methods used in the diagnosis of hepatitis C infections in Turkey. *The Journal of international medical research*, 37(5), 1420

**Ruifeng Yang, Wenli Guan, Qian Wang, Yan Liu, Lai Wei** (2013//). Performance evaluation and comparison of the newly developed Elecsys anti-HCV II assay with other widely used assays. *Clinica chimica acta; international journal of clinical chemistry*, 426(#issue#), 95

**Steven H Kleinman, Susan L Stramer, Jaye P Brodsky, Sally Caglioti, Michael P Busch** (2006//). Integration of nucleic acid amplification test results into hepatitis C virus supplemental serologic testing algorithms: implications for donor counseling and revision of existing algorithms. *Transfusion*, 46(5), 695

**Yuan-Hung Kuo, Kuo-Chin Chang, Jing-Houng Wang, Pei-Shan Tsai, Shu-Feng Hung, Chao-Hung Hung, Chien-Hung Chen, Sheng-Nan Lu** (2012//). Is hepatitis C virus core antigen an adequate marker for community screening?. *Journal of clinical microbiology*, 50(6), 1989

1  
2  
3  
4  
5  
6  
7

**8. Is the (comparator) REFERENCE TEST one of the following commercially-available assays?**

8  
9  
10  
11  
12

O'Flynn N.,Jilg W.,McQuillan T.,Bauer I.,Heyermann M.,Schulte-Kellinghaus B.,Moller D. (1997//). New HCV assay on the Abbott AxSYM random access analyzer *Clinical Laboratory*, 43(5),403

13  
14  
15  
16

**9. Does the study report on the following OUTCOMES?**

17  
18  
19  
20  
21  
22  
23

M Schmidt, A Jimenez, A Muhlbacher, S Oota, L Blanco, T Sakuldamrongpanich, H Schennach, E Seifried (2015//). Head-to-head comparison between two screening systems for HBsAG, anti-HBc, anti-HCV and HIV combination immunoassays in an international, multicentre evaluation study. *Vox sanguinis*, 109(2), 114

24  
25  
26  
27

**10. Is the SETTING representative of primary care?**

28  
29  
30  
31  
32  
33  
34  
35  
36  
37  
38  
39  
40  
41  
42  
43  
44  
45  
46  
47  
48  
49  
50  
51  
52  
53  
54  
55  
56  
57  
58  
59  
60

**11. Does the study take place in a country with a LOW OR MODERATE (<3.5%) PREVALENCE of chronic HCV infection?**

| QUADAS-2                                                                                                                                               | Demoyel, 2004                                                                                                                                                                                            | Tashkandy, 2007                                                                                                                                                                                                                                                            | Bemouda, 2009                                                                                                                                                                                                                                                                                                                                                                         | Rao, 2009                                                                                                                                                                                                                                                                                                                                                                    | Oi, 2009                                                                                                                                                                                                                                                                                             | Kosan, 2010                                                                                                                                                                                                                                                            | Park, 2012                                                                                                       | Sommese, 2014                                                                                                    | Arora, 2016                                                                                                                                                                |
|--------------------------------------------------------------------------------------------------------------------------------------------------------|----------------------------------------------------------------------------------------------------------------------------------------------------------------------------------------------------------|----------------------------------------------------------------------------------------------------------------------------------------------------------------------------------------------------------------------------------------------------------------------------|---------------------------------------------------------------------------------------------------------------------------------------------------------------------------------------------------------------------------------------------------------------------------------------------------------------------------------------------------------------------------------------|------------------------------------------------------------------------------------------------------------------------------------------------------------------------------------------------------------------------------------------------------------------------------------------------------------------------------------------------------------------------------|------------------------------------------------------------------------------------------------------------------------------------------------------------------------------------------------------------------------------------------------------------------------------------------------------|------------------------------------------------------------------------------------------------------------------------------------------------------------------------------------------------------------------------------------------------------------------------|------------------------------------------------------------------------------------------------------------------|------------------------------------------------------------------------------------------------------------------|----------------------------------------------------------------------------------------------------------------------------------------------------------------------------|
| Study population                                                                                                                                       | 5,228 individuals; 5,015 random blood donors and 213 hospitalized patients                                                                                                                               | 106 male blood donors                                                                                                                                                                                                                                                      | 8,326 adults from the general population with unknown HCV serology underwent initial screening with ELISA v3.0                                                                                                                                                                                                                                                                        | 2,559 individuals; 2,082 blood donors (Beijing Red Cross Blood Center) and 477 patients (Peking University Hepatology Institute, including various HCV genotypes, non-C hepatitis, pregnant women, and lipidemia sera)                                                                                                                                                       | 1,200 potential volunteer blood donors underwent screening with ELISA v4.0: 677 females, 523 males, mean age: 32.8 years, age range 18-52 year; sample stratified by two Cambodian provinces (600 each)                                                                                              | 18,200 volunteer blood donors: 546 (3%) were women, 17,654 (97%) were men, 18,198 (99.9%) were first-time donors, mean age: 40 years, age range: 18-60 years                                                                                                           | 1,011 sera from individuals undergoing routine HCV screening                                                     | 840 volunteer blood donors; Second University of Naples; January to June 2013                                    | 21,115 blood donors; blood bank; January 2013 to March 2014                                                                                                                |
| Index test(s)                                                                                                                                          | CLIA (ADVIA Centaur® HCV assay)                                                                                                                                                                          | ELISA v3.0 (Abbott Murex anti-HCV)                                                                                                                                                                                                                                         | ELISA v3.0 (Abbott Murex anti-HCV)                                                                                                                                                                                                                                                                                                                                                    | ELISA v4.0 (EiAgen, Adaltis)                                                                                                                                                                                                                                                                                                                                                 | ELISA v4.0 (Monolisa™, BioRad)                                                                                                                                                                                                                                                                       | ELISA v3.0 (Innotest HCV Ab III, Innogenetics, Belgium)                                                                                                                                                                                                                | CLIA (Vitros Anti-HCV assay, UK)                                                                                 | CMIA (Architect i200SR, Abbott, Germany)                                                                         | ELISA v4.0 (Monolisa BioRad Ag-Ab Ultra)                                                                                                                                   |
| Reference test(s)                                                                                                                                      | MEIA (Abbott AxSYM® HCV v.3.0 assay)                                                                                                                                                                     | LIA (INNO-LIA HCVAb III Update, INNOGENETICS, Belgium) and RT-PCR (High Pure Viral Nucleic Acid reagent set, Roche Molecular Biochemicals)                                                                                                                                 | MEIA (Abbott AxSYM® HCV v.3.0 assay) and RT-PCR (Roche Amplicor HCV® v2.0)                                                                                                                                                                                                                                                                                                            | ELISA v3.0 (Ortho HCV 3.0 ELISA)                                                                                                                                                                                                                                                                                                                                             | CMIA (Abbott)                                                                                                                                                                                                                                                                                        | NAT (Procleix Ultrio kit, Chiron, USA)                                                                                                                                                                                                                                 | ECLIA (Elecys anti-HCV test, Roche, Germany)                                                                     | ECLIA (Cobas e411, Roche, Germany)                                                                               | NAT (Procleix Ultrio kit, Chiron, USA)                                                                                                                                     |
| DOMAIN 1: PATIENT SELECTION                                                                                                                            |                                                                                                                                                                                                          |                                                                                                                                                                                                                                                                            |                                                                                                                                                                                                                                                                                                                                                                                       |                                                                                                                                                                                                                                                                                                                                                                              |                                                                                                                                                                                                                                                                                                      |                                                                                                                                                                                                                                                                        |                                                                                                                  |                                                                                                                  |                                                                                                                                                                            |
| Describe methods of patient selection:                                                                                                                 | Not described                                                                                                                                                                                            | All samples were collected at the Immunology and Serology Department at the Al-Noor Specialist Hospital, Makkah, Saudi Arabia. We excluded all samples from patients with diabetes or other endocrine diseases and autoimmune diseases.                                    | 8,326 adults from the general population with unknown HCV serology underwent initial screening with ELISA v3.0. Initial blood specimen collection took place in work settings, from December 2005 to April 2007 (16 months). A subset of 161 ELISA-positives and 100 ELISA-negatives were called back to undergo the reference standard (verification bias); 3/161 lost to follow-up. | 2,559 individuals; 2,082 blood donors (Beijing Red Cross Blood Center) and 477 patients (Peking University Hepatology Institute, including various HCV genotypes, non-C hepatitis, pregnant women, and lipidemia sera)                                                                                                                                                       | 1,200 potential volunteer blood donors underwent screening with ELISA. A subset of 80 ELISA-positive and 40 ELISA-negative were selected to undergo the reference test (verification bias)                                                                                                           | Turkish Red Crescent Capa Blood Centre of Istanbul; intermittently from February 2007 to March 2008; individuals underwent a mandatory physical exam (no exclusion criteria specified) prior to blood drawing;                                                         | Individuals undergoing "routine HCV screening"; sera collected between August 2009 and January 2011              | "we selected a group of 840 samples from volunteer blood donors"                                                 | "we reviewed the donor screening data for anti-HCV from January 2013 to May 2014". Presumably, all donors during this time period are included.                            |
| Was a consecutive or random sample of patients enrolled?                                                                                               | Unclear                                                                                                                                                                                                  | Unclear                                                                                                                                                                                                                                                                    | Unclear                                                                                                                                                                                                                                                                                                                                                                               | Unclear                                                                                                                                                                                                                                                                                                                                                                      | Unclear                                                                                                                                                                                                                                                                                              | Unclear                                                                                                                                                                                                                                                                | Unclear                                                                                                          | Unclear                                                                                                          | Yes                                                                                                                                                                        |
| Was a case-control design avoided?                                                                                                                     | Yes                                                                                                                                                                                                      | Yes                                                                                                                                                                                                                                                                        | Yes                                                                                                                                                                                                                                                                                                                                                                                   | Yes                                                                                                                                                                                                                                                                                                                                                                          | Yes                                                                                                                                                                                                                                                                                                  | Yes                                                                                                                                                                                                                                                                    | Yes                                                                                                              | Yes                                                                                                              | Yes                                                                                                                                                                        |
| Did the study avoid inappropriate exclusions?                                                                                                          | Yes                                                                                                                                                                                                      | No                                                                                                                                                                                                                                                                         | Yes                                                                                                                                                                                                                                                                                                                                                                                   | Yes                                                                                                                                                                                                                                                                                                                                                                          | Yes                                                                                                                                                                                                                                                                                                  | Yes                                                                                                                                                                                                                                                                    | Yes                                                                                                              | Unclear                                                                                                          | Yes                                                                                                                                                                        |
| Could the selection of patients have introduced bias?                                                                                                  | Unclear risk                                                                                                                                                                                             | Unclear risk                                                                                                                                                                                                                                                               | High risk; due to verification bias, but easily correctable statistically                                                                                                                                                                                                                                                                                                             | Low risk                                                                                                                                                                                                                                                                                                                                                                     | High risk; due to verification bias, but easily correctable statistically                                                                                                                                                                                                                            | Low risk                                                                                                                                                                                                                                                               | Low risk                                                                                                         | Low risk                                                                                                         | Low risk                                                                                                                                                                   |
| Describe included patients (prior testing, presentation, intended use of index test and setting):                                                      | 5,015 random blood donors and 213 hospitalized patients; the 213 (4.1%) hospitalized patients do not reflect the setting or population of the review question.                                           | 106 male blood donors                                                                                                                                                                                                                                                      | 8,326 adults from the general population with unknown HCV serology                                                                                                                                                                                                                                                                                                                    | 477 / 2,559 (18.6%) patients did not meet our inclusion criteria in that they were sampled from a hepatology clinic and their HCV status was known at the outset                                                                                                                                                                                                             | 1,200 potential volunteer blood donors underwent screening with ELISA                                                                                                                                                                                                                                | 18,200 volunteer blood donors: 546 (3%) were women, 17,654 (97%) were men, 18,198 (99.9%) were first-time donors, mean age: 40 years, age range: 18-60 years; individuals underwent a mandatory physical exam (no exclusion criteria specified) prior to blood drawing | 1,011 sera from individuals undergoing routine HCV screening                                                     | 840 volunteer blood donors: 275 (32.7%) were women, 564 (67.3%) men, mean age: 37.7 years (SD 12.5 years)        | 21,115 blood donors; presumably all consecutive blood donors during the study period                                                                                       |
| Is there concern that the included patients do not match the review question?                                                                          | Low concern                                                                                                                                                                                              | Low concern                                                                                                                                                                                                                                                                | Low concern                                                                                                                                                                                                                                                                                                                                                                           | High concern                                                                                                                                                                                                                                                                                                                                                                 | Low concern                                                                                                                                                                                                                                                                                          | Low concern                                                                                                                                                                                                                                                            | Low concern                                                                                                      | Low concern                                                                                                      | Low concern                                                                                                                                                                |
| DOMAIN 2: INDEX TEST(S)                                                                                                                                |                                                                                                                                                                                                          |                                                                                                                                                                                                                                                                            |                                                                                                                                                                                                                                                                                                                                                                                       |                                                                                                                                                                                                                                                                                                                                                                              |                                                                                                                                                                                                                                                                                                      |                                                                                                                                                                                                                                                                        |                                                                                                                  |                                                                                                                  |                                                                                                                                                                            |
| Describe the index test and how it was conducted and interpreted:                                                                                      | CLIA (ADVIA Centaur® HCV assay); no further description                                                                                                                                                  | ELISA v3.0 (Abbott Murex anti-HCV)                                                                                                                                                                                                                                         | ELISA v3.0 (Abbott Murex anti-HCV)                                                                                                                                                                                                                                                                                                                                                    | ELISA v4.0 (EiAgen, Adaltis)                                                                                                                                                                                                                                                                                                                                                 | ELISA v4.0 (Monolisa™, BioRad)                                                                                                                                                                                                                                                                       | ELISA v3.0 (Innotest HCV Ab III, Innogenetics, Belgium); done "in parallel" with the reference test                                                                                                                                                                    | CLIA (Vitros Anti-HCV assay, UK)                                                                                 | CMIA (Architect i200SR, Abbott, Germany)                                                                         | ELISA v4.0 (Monolisa BioRad Ag-Ab Ultra)                                                                                                                                   |
| Were the index test results interpreted without knowledge of the results of the reference standard?                                                    | Unclear                                                                                                                                                                                                  | Unclear                                                                                                                                                                                                                                                                    | Unclear                                                                                                                                                                                                                                                                                                                                                                               | Yes; the EiAgen and Ortho tests were always run "side-by-side"                                                                                                                                                                                                                                                                                                               | Yes                                                                                                                                                                                                                                                                                                  | Unclear                                                                                                                                                                                                                                                                | Unclear                                                                                                          | Unclear                                                                                                          | Unclear                                                                                                                                                                    |
| If a threshold was used, was it pre-specified?                                                                                                         | Yes. "The presence or absence of antibodies to HCV is determined by comparing the sample index to the cut-off. Samples with an index value greater than 1.0 are considered to be reactive for anti-HCV." | Unclear; presumably used as per the kit manufacturer's instructions.                                                                                                                                                                                                       | Unclear; presumably used as per the kit manufacturer's instructions.                                                                                                                                                                                                                                                                                                                  | Yes. "Both ELISA yield their final results as ratios of the specimen signal (in relative light units) to the cut-off value (signal-to-cut-off ratio, S/CO). S/CO ratios ≥1.0 were considered reactive for anti-HCV antibodies while those <1.0 were considered nonreactive. Specimen preparation and testing were carried out according to the manufacturers' instructions." | Yes. "The CMIA analysis of anti-HCV is based on the signal to cut-off ration (S/CO). An S/CO value less than 1.00 is classified as negative, and a value higher than 1.00 is classified as positive. Units with ratios in the range of 0.90-1.00 are classified as equivocal and re-analyzed twice." | Unclear; presumably used as per the kit manufacturer's instructions.                                                                                                                                                                                                   | Yes. "A signal to cut-off ration (S/CO) greater than 1.0 was regarded as positive."                              | Yes. "For all assays, S/CO ratios ≥1 were considered as initial reactive (IR)."                                  | Yes. "Samples with an S/CO ratio of ≥1.0 are defined by the manufacturer as positive."                                                                                     |
| Could the conduct or interpretation of the index test have introduced bias?                                                                            | Unclear risk                                                                                                                                                                                             | Unclear risk                                                                                                                                                                                                                                                               | Unclear risk                                                                                                                                                                                                                                                                                                                                                                          | Low risk                                                                                                                                                                                                                                                                                                                                                                     | Low risk                                                                                                                                                                                                                                                                                             | Unclear risk                                                                                                                                                                                                                                                           | Low risk                                                                                                         | Low risk                                                                                                         | Low risk                                                                                                                                                                   |
| Is there concern that the index test, its conduct, or interpretation differ from the review question?                                                  | Low concern                                                                                                                                                                                              | Low concern                                                                                                                                                                                                                                                                | Low concern                                                                                                                                                                                                                                                                                                                                                                           | Low concern                                                                                                                                                                                                                                                                                                                                                                  | Low concern                                                                                                                                                                                                                                                                                          | Low concern                                                                                                                                                                                                                                                            | Low concern                                                                                                      | Low concern                                                                                                      | Low concern                                                                                                                                                                |
| DOMAIN 3: REFERENCE STANDARD(S)                                                                                                                        |                                                                                                                                                                                                          |                                                                                                                                                                                                                                                                            |                                                                                                                                                                                                                                                                                                                                                                                       |                                                                                                                                                                                                                                                                                                                                                                              |                                                                                                                                                                                                                                                                                                      |                                                                                                                                                                                                                                                                        |                                                                                                                  |                                                                                                                  |                                                                                                                                                                            |
| Describe the reference standard and how it was conducted and interpreted:                                                                              | MEIA (Abbott AxSYM® HCV v.3.0 assay) detects antibodies only, cannot distinguish between acute, chronic or resolved (~15%) HCV infection                                                                 | 1) LIA (INNO-LIA HCVAb III Update, INNOGENETICS, Belgium) – cannot differentiate between current and resolved infection; and 2) RT-PCR (High Pure Viral Nucleic Acid reagent set, Roche Molecular Biochemicals) – can differentiate between current and resolved infection | 1) MEIA (Abbott AxSYM® HCV v.3.0 assay) – cannot differentiate between current and resolved infection; 2) RT-PCR (Roche Amplicor HCV® v2.0) – able to differentiate between current and resolved infection                                                                                                                                                                            | ELISA v3.0 (Ortho HCV 3.0 ELISA) – Cannot differentiate between current and resolved infection                                                                                                                                                                                                                                                                               | CMIA (Abbott)                                                                                                                                                                                                                                                                                        | NAT (Procleix Ultrio kit, Chiron, USA); done "in parallel" with the index test                                                                                                                                                                                         | ECLIA (Elecys anti-HCV test, Roche, Germany)                                                                     | ECLIA (Cobas e411, Roche, Germany)                                                                               | NAT (Procleix Ultrio kit, Chiron, USA)                                                                                                                                     |
| Is the reference standard likely to correctly classify the target condition (i.e., HCV infection)?                                                     | Yes; but unlike PCR/NAT this reference standard would fail to identify false-positives due to resolved infection                                                                                         | Yes (for PCR)                                                                                                                                                                                                                                                              | Yes (for PCR)                                                                                                                                                                                                                                                                                                                                                                         | Yes; but unlike PCR/NAT this reference standard would fail to identify false-positives due to resolved infection                                                                                                                                                                                                                                                             | Yes; but unlike PCR/NAT this reference standard would fail to identify false-positives due to resolved infection                                                                                                                                                                                     | Yes                                                                                                                                                                                                                                                                    | Yes; but unlike PCR/NAT this reference standard would fail to identify false-positives due to resolved infection | Yes; but unlike PCR/NAT this reference standard would fail to identify false-positives due to resolved infection | Yes                                                                                                                                                                        |
| Were the reference standard results interpreted without knowledge of the results of the index test?                                                    | Unclear                                                                                                                                                                                                  | Unclear                                                                                                                                                                                                                                                                    | Unclear                                                                                                                                                                                                                                                                                                                                                                               | Yes; the EiAgen and Ortho tests were always run "side-by-side"                                                                                                                                                                                                                                                                                                               | Yes; the subsample of blood units was "blindly re-analyzed" in Norway                                                                                                                                                                                                                                | Unclear                                                                                                                                                                                                                                                                | Unclear                                                                                                          | Unclear                                                                                                          | Unclear                                                                                                                                                                    |
| Could the reference standard, its conduct, or its interpretation have introduced bias?                                                                 | High risk                                                                                                                                                                                                | Unclear risk                                                                                                                                                                                                                                                               | Unclear risk                                                                                                                                                                                                                                                                                                                                                                          | High risk                                                                                                                                                                                                                                                                                                                                                                    | High risk                                                                                                                                                                                                                                                                                            | Low risk                                                                                                                                                                                                                                                               | High risk                                                                                                        | High risk                                                                                                        | Low risk                                                                                                                                                                   |
| Is there concern that the target condition as defined by the reference standard does not match the review question?                                    | Serious concern                                                                                                                                                                                          | Low concern (for PCR)                                                                                                                                                                                                                                                      | Low concern (for PCR)                                                                                                                                                                                                                                                                                                                                                                 | Serious concern                                                                                                                                                                                                                                                                                                                                                              | Serious concern                                                                                                                                                                                                                                                                                      | Low concern                                                                                                                                                                                                                                                            | Serious concern                                                                                                  | Serious concern                                                                                                  | Low concern                                                                                                                                                                |
| DOMAIN 4: FLOW AND TIMING                                                                                                                              |                                                                                                                                                                                                          |                                                                                                                                                                                                                                                                            |                                                                                                                                                                                                                                                                                                                                                                                       |                                                                                                                                                                                                                                                                                                                                                                              |                                                                                                                                                                                                                                                                                                      |                                                                                                                                                                                                                                                                        |                                                                                                                  |                                                                                                                  |                                                                                                                                                                            |
| Describe any patients who did not receive the index test(s) and/or reference standard or who were excluded from the 2x2 table (refer to flow diagram): | 2 patients with equivocal positive results were excluded from the authors' specificity calculation, but we will include them                                                                             | All patients received ELISA, LIA, and RT-PCR.                                                                                                                                                                                                                              | A subset of 161 ELISA-positives and 100 ELISA-negatives were called back to undergo the reference standard (verification bias); 3/161 lost to follow-up                                                                                                                                                                                                                               | None                                                                                                                                                                                                                                                                                                                                                                         | A subset of 80 ELISA-positive and 40 ELISA-negative were selected to undergo the reference test (verification bias)                                                                                                                                                                                  | None                                                                                                                                                                                                                                                                   | None                                                                                                             | None                                                                                                             | None                                                                                                                                                                       |
| Describe the time interval and any interventions between index test(s) and reference standard:                                                         | Not specified; presumably, both tests were applied to the same blood samples                                                                                                                             | All samples were aliquoted into two portions; one was kept at 70°C until processing for RT-PCR and the other was subjected to HCV antibody detection by ELISA and LIA methods                                                                                              | time interval between tests not specified                                                                                                                                                                                                                                                                                                                                             | The EiAgen and Ortho tests were always run "side-by-side"                                                                                                                                                                                                                                                                                                                    | Both tests were applied to the same blood samples                                                                                                                                                                                                                                                    | For each subject, two sets of blood samples were collected: one for serological testing and one for NAT testing                                                                                                                                                        | Not specified; presumably, all sera underwent both the index and reference test                                  | Serum samples of the 840 blood donors were tested in parallel using the index and reference tests                | All samples were screened with the index and reference tests in parallel; 3 pilot tube samples were collected with each donation - one was used for NAT, another for ELISA |
| Was there an appropriate interval between index test(s) and reference standard?                                                                        | Yes                                                                                                                                                                                                      | Yes                                                                                                                                                                                                                                                                        | Unclear                                                                                                                                                                                                                                                                                                                                                                               | Yes                                                                                                                                                                                                                                                                                                                                                                          | Yes                                                                                                                                                                                                                                                                                                  | Yes                                                                                                                                                                                                                                                                    | Yes                                                                                                              | Yes                                                                                                              | Yes                                                                                                                                                                        |
| Did all patients receive a reference standard?                                                                                                         | Yes                                                                                                                                                                                                      | Yes                                                                                                                                                                                                                                                                        | No; verification bias is present                                                                                                                                                                                                                                                                                                                                                      | Yes                                                                                                                                                                                                                                                                                                                                                                          | No; verification bias is present                                                                                                                                                                                                                                                                     | Yes                                                                                                                                                                                                                                                                    | Yes                                                                                                              | Yes                                                                                                              | Yes                                                                                                                                                                        |
| Did patients receive the same reference standard?                                                                                                      | Yes                                                                                                                                                                                                      | Yes                                                                                                                                                                                                                                                                        | Yes                                                                                                                                                                                                                                                                                                                                                                                   | Yes                                                                                                                                                                                                                                                                                                                                                                          | Yes                                                                                                                                                                                                                                                                                                  | Yes                                                                                                                                                                                                                                                                    | Yes                                                                                                              | Yes                                                                                                              | Yes                                                                                                                                                                        |
| Were all patients included in the analysis?                                                                                                            | Yes                                                                                                                                                                                                      | Yes                                                                                                                                                                                                                                                                        | No; 3/161 lost to follow-up                                                                                                                                                                                                                                                                                                                                                           | Yes                                                                                                                                                                                                                                                                                                                                                                          | Yes                                                                                                                                                                                                                                                                                                  | Yes                                                                                                                                                                                                                                                                    | Yes                                                                                                              | Yes                                                                                                              | Yes                                                                                                                                                                        |
| Could the patient flow have introduced bias?                                                                                                           | Low risk                                                                                                                                                                                                 | Low risk                                                                                                                                                                                                                                                                   | High risk; the differential sampling of 158/161 (98%) ELISA-positive and 100/8,165 (1%) ELISA-negative persons; Sn and Sp reported in the article are not adjusted for differential sampling leading to large verification bias; this is easily correctable statistically                                                                                                             | Low risk                                                                                                                                                                                                                                                                                                                                                                     | High risk; the differential sampling of 80/176 (45%) ELISA-positive and 40/1,024 (4%) ELISA-negative persons; Sn and Sp reported in the article are not adjusted for differential sampling leading to large verification bias; this is easily correctable statistically                              | Low risk                                                                                                                                                                                                                                                               | Low risk                                                                                                         | Low risk                                                                                                         | Low risk                                                                                                                                                                   |

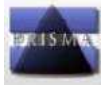

# PRISMA 2009 Checklist

1  
2  
3  
4  
5  
6  
7  
8  
9  
10  
11  
12  
13  
14  
15  
16  
17  
18  
19  
20  
21  
22  
23  
24  
25  
26  
27  
28  
29  
30  
31  
32  
33  
34  
35  
36  
37  
38  
39  
40  
41  
42  
43  
44  
45  
46  
47  
48  
49

| Section/topic                      | #  | Checklist item                                                                                                                                                                                                                                                                                              | Reported on page # |
|------------------------------------|----|-------------------------------------------------------------------------------------------------------------------------------------------------------------------------------------------------------------------------------------------------------------------------------------------------------------|--------------------|
| <b>TITLE</b>                       |    |                                                                                                                                                                                                                                                                                                             |                    |
| Title                              | 1  | Identify the report as a systematic review, meta-analysis, or both.                                                                                                                                                                                                                                         | 1                  |
| <b>ABSTRACT</b>                    |    |                                                                                                                                                                                                                                                                                                             |                    |
| Structured summary                 | 2  | Provide a structured summary including, as applicable: background; objectives; data sources; study eligibility criteria, participants, and interventions; study appraisal and synthesis methods; results; limitations; conclusions and implications of key findings; systematic review registration number. | 2                  |
| <b>INTRODUCTION</b>                |    |                                                                                                                                                                                                                                                                                                             |                    |
| Rationale                          | 3  | Describe the rationale for the review in the context of what is already known.                                                                                                                                                                                                                              | 3                  |
| Objectives                         | 4  | Provide an explicit statement of questions being addressed with reference to participants, interventions, comparisons, outcomes, and study design (PICOS).                                                                                                                                                  | 3                  |
| <b>METHODS</b>                     |    |                                                                                                                                                                                                                                                                                                             |                    |
| Protocol and registration          | 5  | Indicate if a review protocol exists, if and where it can be accessed (e.g., Web address), and, if available, provide registration information including registration number.                                                                                                                               | 5                  |
| Eligibility criteria               | 6  | Specify study characteristics (e.g., PICOS, length of follow-up) and report characteristics (e.g., years considered, language, publication status) used as criteria for eligibility, giving rationale.                                                                                                      | 5                  |
| Information sources                | 7  | Describe all information sources (e.g., databases with dates of coverage, contact with study authors to identify additional studies) in the search and date last searched.                                                                                                                                  | 6                  |
| Search                             | 8  | Present full electronic search strategy for at least one database, including any limits used, such that it could be repeated.                                                                                                                                                                               | Appendix B         |
| Study selection                    | 9  | State the process for selecting studies (i.e., screening, eligibility, included in systematic review, and, if applicable, included in the meta-analysis).                                                                                                                                                   | 5                  |
| Data collection process            | 10 | Describe method of data extraction from reports (e.g., piloted forms, independently, in duplicate) and any processes for obtaining and confirming data from investigators.                                                                                                                                  | 6                  |
| Data items                         | 11 | List and define all variables for which data were sought (e.g., PICOS, funding sources) and any assumptions and simplifications made.                                                                                                                                                                       | 6                  |
| Risk of bias in individual studies | 12 | Describe methods used for assessing risk of bias of individual studies (including specification of whether this was done at the study or outcome level), and how this information is to be used in any data synthesis.                                                                                      | 6                  |
| Summary measures                   | 13 | State the principal summary measures (e.g., risk ratio, difference in means).                                                                                                                                                                                                                               | 6                  |
| Synthesis of results               | 14 | Describe the methods of handling data and combining results of studies, if done, including measures of consistency (e.g., $I^2$ ) for each meta-analysis. <b>For Peer Review Only</b>                                                                                                                       | 6                  |



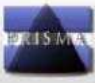

# PRISMA 2009 Checklist

1  
2  
3  
4  
5  
6  
7  
8  
9  
10  
11  
12  
13  
14  
15  
16  
17  
18  
19  
20  
21  
22  
23  
24  
25  
26  
27  
28  
29  
30  
31  
32  
33  
34  
35  
36  
37  
38  
39  
40  
41  
42  
43  
44  
45  
46  
47  
48  
49

| Section/topic                 | #  | Checklist item                                                                                                                                                                                           | Reported on page # |
|-------------------------------|----|----------------------------------------------------------------------------------------------------------------------------------------------------------------------------------------------------------|--------------------|
| Risk of bias across studies   | 15 | Specify any assessment of risk of bias that may affect the cumulative evidence (e.g., publication bias, selective reporting within studies).                                                             | 6                  |
| Additional analyses           | 16 | Describe methods of additional analyses (e.g., sensitivity or subgroup analyses, meta-regression), if done, indicating which were pre-specified.                                                         | N/A                |
| <b>RESULTS</b>                |    |                                                                                                                                                                                                          |                    |
| Study selection               | 17 | Give numbers of studies screened, assessed for eligibility, and included in the review, with reasons for exclusions at each stage, ideally with a flow diagram.                                          | Figure 1           |
| Study characteristics         | 18 | For each study, present characteristics for which data were extracted (e.g., study size, PICOS, follow-up period) and provide the citations.                                                             | Table 2            |
| Risk of bias within studies   | 19 | Present data on risk of bias of each study and, if available, any outcome level assessment (see item 12).                                                                                                | Appendix D         |
| Results of individual studies | 20 | For all outcomes considered (benefits or harms), present, for each study: (a) simple summary data for each intervention group (b) effect estimates and confidence intervals, ideally with a forest plot. | Table 3            |
| Synthesis of results          | 21 | Present results of each meta-analysis done, including confidence intervals and measures of consistency.                                                                                                  | N/A                |
| Risk of bias across studies   | 22 | Present results of any assessment of risk of bias across studies (see Item 15).                                                                                                                          | Table 5            |
| Additional analysis           | 23 | Give results of additional analyses, if done (e.g., sensitivity or subgroup analyses, meta-regression [see Item 16]).                                                                                    | N/A                |
| <b>DISCUSSION</b>             |    |                                                                                                                                                                                                          |                    |
| Summary of evidence           | 24 | Summarize the main findings including the strength of evidence for each main outcome; consider their relevance to key groups (e.g., healthcare providers, users, and policy makers).                     | 8                  |
| Limitations                   | 25 | Discuss limitations at study and outcome level (e.g., risk of bias), and at review-level (e.g., incomplete retrieval of identified research, reporting bias).                                            | 9                  |
| Conclusions                   | 26 | Provide a general interpretation of the results in the context of other evidence, and implications for future research.                                                                                  | 9                  |
| <b>FUNDING</b>                |    |                                                                                                                                                                                                          |                    |
| Funding                       | 27 | Describe sources of funding for the systematic review and other support (e.g., supply of data); role of funders for the systematic review.                                                               | 9                  |

From: Moher D, Liberati A, Tetzlaff J, Altman DG, The PRISMA Group (2009). Preferred Reporting Items for Systematic Reviews and Meta-Analyses: The PRISMA Statement. PLoS Med 6(6): e1000097. doi:10.1371/journal.pmed1000097
